# Supplementary material for: Demographic and genetic factors in the recovery or demise of ex situ populations following a severe bottleneck in fifteen species of Hawaiian tree snails
Source: PeerJ. 2015 Nov 12;3:e1406. doi: 10.7717/peerj.1406 (PMC4647602; doi:10.7717/peerj.1406)
Supplement: Supplemental Information 1 [file peerj-03-1406-s005.xls]

## Sheet: Sheet1
GENUS	SPECIES	ID	YEAR COLLECTED	DATE COLLECTED	BIRTHDATE	BIRTHYEAR	LENGTH	Age Class	Calc1	Age_Calc	WIDTH	Generation	CAGE	AgeAtDeath	Maturity	AliveAtMaturity?
Achatinella	apexfulva	1	1995	1995-02-01	1987-07-08	1987	19	NonKeiki	8	7.57534		FOUNDER	Poamoho	non-juvenile	1993-07-06	yes
Achatinella	apexfulva	3	2001	2001-02-27	1991-10-13	1991	21.2	NonKeiki	10.2	9.38356	14.06	FOUNDER	Poamoho	non-juvenile	1997-10-11	yes
Achatinella	apexfulva		1995	1995-02-01	1992-12-28	1992	13	NonKeiki	2	2.09589		FOUNDER	Poamoho	non-juvenile	1998-12-27	no
Achatinella	apexfulva	5	2001	2001-12-06	1994-01-18	1994	19.38	NonKeiki	8.38	7.88767	12.37	FOUNDER	Poamoho	non-juvenile	2000-01-17	yes
Achatinella	apexfulva	4	2001	2001-02-20	1995-11-21 19:12:00	1995	16.97	NonKeiki	5.97	5.2526	13.25	FOUNDER	Poamoho	non-juvenile	2001-11-19 19:12:00	no
Achatinella	apexfulva	2	2001	2001-01-03	1997-12-13	1997	14.76	NonKeiki	3.76	3.06027	10.78	FOUNDER	Poamoho	non-juvenile	2003-12-12	no
Achatinella	apexfulva	23	2006	2006-11-13	1998-07-17	1998	19.92	NonKeiki	8.92	8.33151	13.06	FOUNDER	Poamoho	non-juvenile	2004-07-15	yes
Achatinella	apexfulva	20	2005	2005-03-22	1998-10-08	1998	17.64	NonKeiki	6.64	6.45753	12.45	F1	Poamoho	non-juvenile	2004-10-06	yes
Achatinella	apexfulva	22	2006	2006-05-02	2000-01-14	2000	17.45	NonKeiki	6.45	6.30137	11.36	F1	Poamoho	non-juvenile	2006-01-12	yes
Achatinella	apexfulva	8	2001	2001-10-10	2000-03-16	2000	12.04	NonKeiki	1.04	1.56986	9.5	F1	Poamoho	non-juvenile	2006-03-15	no
Achatinella	apexfulva	26	2007	2007-04-02	2000-04-21	2000	18.24	NonKeiki	7.24	6.95068	12.69	F1	Poamoho	non-juvenile	2006-04-20	yes
Achatinella	apexfulva	10	2002	2002-03-11	2000-10-24	2000	11.69	NonKeiki	0.69	1.37808	9.71	F1	Poamoho	non-juvenile	2006-10-23	no
Achatinella	apexfulva	31	2008	2008-01-07	2000-11-12	2000	18.49	NonKeiki	7.49	7.15616	11.6	F1	Poamoho	non-juvenile	2006-11-11	yes
Achatinella	apexfulva	33	2008	2008-02-20	2000-11-29	2000	18.58	NonKeiki	7.58	7.23014	12.45	F1	Poamoho	non-juvenile	2006-11-28	yes
Achatinella	apexfulva	24	2007	2007-03-05	2001-01-18	2001	17.24	NonKeiki	6.24	6.12877	13.04	F1	Poamoho	non-juvenile	2007-01-17	yes
Achatinella	apexfulva	7	2001	2001-12-06	2001-03-27 06:00:00	2001	9.56	Keiki	4.06	0.695205	8.07	F1	Poamoho	juvenile	2007-03-26 06:00:00	no
Achatinella	apexfulva	9	2001	2001-12-31	2001-06-14	2001	8.7	Keiki	3.2	0.547945	6.5	F1	Poamoho	juvenile	2007-06-13	no
Achatinella	apexfulva	12	2002	2002-03-25	2001-07-29 21:00:00	2001	9.31	Keiki	3.81	0.652397	7.26	F1	Poamoho	juvenile	2007-07-28 21:00:00	no
Achatinella	apexfulva	15	2002	2002-06-17	2001-08-23 12:00:00	2001	10.26	Keiki	4.76	0.815068	8.08	F1	Poamoho	juvenile	2007-08-22 12:00:00	no
Achatinella	apexfulva	6	2001	2001-12-06	2001-09-18 21:00:00	2001	6.75	Keiki	1.25	0.214041	5.34	F1	Poamoho	juvenile	2007-09-17 21:00:00	no
Achatinella	apexfulva	30	2008	2008-01-07	2001-09-20	2001	17.45	NonKeiki	6.45	6.30137	12.9	F1	Poamoho	non-juvenile	2007-09-19	yes
Achatinella	apexfulva	16	2002	2002-08-26	2001-12-05 21:00:00	2001	9.71	Keiki	4.21	0.72089	7.56	F1	Poamoho	juvenile	2007-12-04 21:00:00	no
Achatinella	apexfulva	11	2002	2002-03-11	2001-12-09 18:00:00	2001	6.96	Keiki	1.46	0.25	5.7	F1	Poamoho	juvenile	2007-12-08 18:00:00	no
Achatinella	apexfulva	13	2002	2002-04-22	2002-03-20 12:00:00	2002	6.02	Keiki	0.52	0.0890411	4.85	F1	Poamoho	juvenile	2008-03-18 12:00:00	no
Achatinella	apexfulva	27	2007	2007-04-30	2002-04-22	2002	16.65	NonKeiki	5.65	5.02466	11.66	F1	Poamoho	non-juvenile	2008-04-20	no
Achatinella	apexfulva	17	2002	2002-10-31	2002-08-23 06:00:00	2002	6.6	Keiki	1.1	0.188356	5.14	F1	Poamoho	juvenile	2008-08-21 06:00:00	no
Achatinella	apexfulva	18	2003	2003-03-07	2003-01-25 09:00:00	2003	6.15	Keiki	0.65	0.111301	4.51	F1	Poamoho	juvenile	2009-01-23 09:00:00	no
Achatinella	apexfulva	19	2004	2004-05-17	2004-05-17	2004	3.6	Keiki	0	0	3.8	F1	Poamoho	juvenile	2010-05-16	no
Achatinella	apexfulva	32	2008	2008-01-24	2004-06-04	2004	15.82	NonKeiki	4.82	3.6411	11.89	F1	Poamoho	non-juvenile	2010-06-03	no
Achatinella	apexfulva	21	2006	2006-03-20	2006-02-23 15:00:00	2006	5.89	Keiki	0.39	0.0667808	3.91	F1	Poamoho	juvenile	2012-02-22 15:00:00	no
Achatinella	apexfulva	25	2007	2007-03-05	2006-10-13 12:00:00	2006	7.78	Keiki	2.28	0.390411	6.61	F1	Poamoho	juvenile	2012-10-11 12:00:00	no
Achatinella	apexfulva	28	2008	2008-05-24	2006-11-06	2006	12	NonKeiki	1	1.54795	8.4	F1	Poamoho	non-juvenile	2012-11-04	no
Achatinella	apexfulva	29	2007	2007-08-06	2007-01-11 03:00:00	2007	8.81	Keiki	3.31	0.566781	6.85	F1	Poamoho	juvenile	2013-01-09 03:00:00	no
Achatinella	apexfulva	ALIVE	2014	2014-06-11	2008-02-08	2008	17.5	NonKeiki	6.5	6.34247	12.3	F1	Poamoho	non-juvenile	2014-02-06	yes
