# Supplementary material for: Demographic and genetic factors in the recovery or demise of ex situ populations following a severe bottleneck in fifteen species of Hawaiian tree snails
Source: PeerJ. 2015 Nov 12;3:e1406. doi: 10.7717/peerj.1406 (PMC4647602; doi:10.7717/peerj.1406)
Supplement: Supplemental Information 5 [file peerj-03-1406-s009.xls]

## Sheet: Sheet1
GENUS	SPECIES	ID	YEAR COLLECTED	DATE COLLECTED	BIRTHDATE	BIRTHYEAR	LENGTH	Age Class	Calc1	Age_Calc	WIDTH	Generation	CAGE	Maturity	AliveAtMaturity?	Shell Corrosion?	DATE COLLECTED	1998	1999	2000	2001	2002	2003	2004	2005	2006	2007	2008	2009	2010	2011	2012	SUMMat	LivedToMaturity?
Achatinella	fuscobasis	0	1991	1991-03-26	1987-01-25	1987	15.78	NonKeiki	5.78	4.16712	10.5	FOUNDER		1990-07-25 12:00:00	Yes
Achatinella	fuscobasis	0	1991	1991-03-26	1988-07-30	1988	13.02	NonKeiki	3.02	2.65479	9.67	FOUNDER		1992-07-29	No
Achatinella	fuscobasis	9	1991	1991-09-04	1988-07-18	1988	13.89	NonKeiki	3.89	3.13151	8	FOUNDER	POP1A Adult	1992-07-17	No
Achatinella	fuscobasis	5	1993	1993-01-03	1988-10-31	1988	15.8	NonKeiki	5.8	4.17808	9.99	FOUNDER	POP2 Adult B	1992-04-30 12:00:00	Yes
Achatinella	fuscobasis	0	1991	1991-12-10	1989-06-24	1989	12.67	NonKeiki	2.67	2.46301	8.78	FOUNDER	POP2 Adult B	1993-06-23	No
Achatinella	fuscobasis	1	1993	1993-06-11	1989-08-06	1989	15.2	NonKeiki	5.2	3.84932	10	FOUNDER	POP1A Adult	1993-02-03 12:00:00	Yes
Achatinella	fuscobasis	4	1996	1996-11-14	1990-06-11 12:00:00	1990	17.93	NonKeiki	7.93	6.43151	11.55	FOUNDER	POP1	1993-12-10	Yes
Achatinella	fuscobasis	0	1997	1997-01-12	1990-03-13	1990	18.2	NonKeiki	8.2	6.8411	13	FOUNDER	POP1	1993-09-10 12:00:00	Yes
Achatinella	fuscobasis	0	1997	1997-10-29	1990-12-17 14:24:00	1990	18.24	NonKeiki	8.24	6.86959	12.51	FOUNDER	POP1A	1994-06-17 02:24:00	Yes
Achatinella	fuscobasis	0	1991	1991-05-29	1991-05-29	1991	2.05	Keiki	0	0	2	F1	POP1A Adult	1995-05-28	No
Achatinella	fuscobasis	0	1991	1991-05-29	1991-05-29	1991	2.45	Keiki	0	0	2.22	F1	Pop 2	1995-05-28	No
Achatinella	fuscobasis	0	1991	1991-08-16	1991-08-16	1991	3	Keiki	0	0	2.89	F1	Pop 2	1995-08-15	No
Achatinella	fuscobasis	0	1991	1991-12-10	1991-12-10	1991	2.84	Keiki	0	0	2.5	F1		1995-12-09	No
Achatinella	fuscobasis	0	1991	1991-12-10	1991-12-10	1991	2.89	Keiki	0	0	2.3	F1		1995-12-09	No
Achatinella	fuscobasis	0	1994	1994-04-13	1991-03-19	1991	13.78	NonKeiki	3.78	3.07123	8.89	F1		1995-03-18	No
Achatinella	fuscobasis	8	1994	1994-11-22	1991-05-03	1991	14.67	NonKeiki	4.67	3.5589	8.06	F1		1994-10-31 12:00:00	Yes
Achatinella	fuscobasis	6	1995	1995-11-11	1991-03-10	1991	16.1	NonKeiki	6.1	4.67671	10.01	F1	POP2 Adult B	1994-09-07 12:00:00	Yes
Achatinella	fuscobasis	0	1996	1996-01-13	1991-10-23	1991	15.89	NonKeiki	5.89	4.2274	9.78	F1	POP2 Adult B	1995-04-22 12:00:00	Yes
Achatinella	fuscobasis	0	1996	1996-01-29	1991-06-19	1991	16	NonKeiki	6	4.61644	10.78	F1	Pop 1	1994-12-17 12:00:00	Yes
Achatinella	fuscobasis	2	1996	1996-08-14	1991-02-15 09:36:00	1991	16.84	NonKeiki	6.84	5.49753	11.1	F1	POP 2	1994-08-15 21:36:00	Yes
Achatinella	fuscobasis	0	1997	1997-02-28	1991-09-18 04:48:00	1991	16.77	NonKeiki	6.77	5.45151	11.63	F1	POP1	1995-03-18 16:48:00	Yes
Achatinella	fuscobasis	0	1997	1997-09-15	1991-01-02 09:36:00	1991	18.01	NonKeiki	8.01	6.70575	10.32	F1	POP 2	1994-07-02 21:36:00	Yes
Achatinella	fuscobasis	0	1997	1997-12-08	1991-07-20 12:00:00	1991	17.87	NonKeiki	7.87	6.39041	11.53	F1	POP1A	1995-01-18	Yes
Achatinella	fuscobasis	0	1992	1992-08-20	1992-08-20	1992	3	Keiki	0	0	2.89	F1		1996-08-19	No
Achatinella	fuscobasis	0	1992	1992-09-13	1992-09-13	1992	2.56	Keiki	0	0	2.33	F1		1996-09-12	No
Achatinella	fuscobasis	0	1992	1992-09-13	1992-09-13	1992	3.56	Keiki	0	0	3	F1		1996-09-12	No
Achatinella	fuscobasis	0	1992	1992-09-28	1992-09-28	1992	2.45	Keiki	0	0	2.33	F1	Pop 2	1996-09-27	No
Achatinella	fuscobasis	0	1993	1993-03-04	1992-11-25 18:21:10	1992	5.67	Keiki	1.67	0.269138	4	F1		1996-11-24 18:21:10	No
Achatinella	fuscobasis	0	1993	1993-04-15	1992-04-11	1992	10.02	NonKeiki	0.02	1.01096	7.9	F1		1996-04-10	No
Achatinella	fuscobasis	0	1999	1999-08-02	1992-04-24 09:36:00	1992	18.81	NonKeiki	8.81	7.27562	11.55	F1	POP1B	1995-10-23 21:36:00	Yes
Achatinella	fuscobasis	0	1993	1993-02-12	1993-02-12	1993	3.89	Keiki	0	0	3.34	F1		1997-02-11	No
Achatinella	fuscobasis	0	1993	1993-03-25	1993-03-25	1993	2.45	Keiki	0	0	2.3	F1		1997-03-24	No
Achatinella	fuscobasis	0	1993	1993-03-25	1993-03-25	1993	3	Keiki	0	0	2.89	F1		1997-03-24	No
Achatinella	fuscobasis	0	1993	1993-04-15	1993-04-15	1993	3.34	Keiki	0	0	2.96	F1		1997-04-14	No
Achatinella	fuscobasis	0	1993	1993-04-27	1993-04-27	1993	3.34	Keiki	0	0	3	F1		1997-04-26	No
Achatinella	fuscobasis	3	1996	1996-05-03	1993-10-25	1993	12.78	NonKeiki	2.78	2.52329	7.89	F1	POP2 Adult B	1997-10-24	No
Achatinella	fuscobasis	7	1997	1997-04-14	1993-07-17	1993	15.01	NonKeiki	5.01	3.74521	10.55	F1	Pop 1	1997-01-14 12:00:00	Yes
Achatinella	fuscobasis	0	1997	1997-07-07	1993-06-25	1993	15.54	NonKeiki	5.54	4.03562	10.63	F1	POP1A	1996-12-23 12:00:00	Yes
Achatinella	fuscobasis	0	1997	1997-07-21	1993-04-30	1993	15.89	NonKeiki	5.89	4.2274	10	F1	POP2 Adult B	1996-10-28 12:00:00	Yes
Achatinella	fuscobasis	0	1999	1999-05-24	1993-06-19	1993	17.2	NonKeiki	7.2	5.93151	10.55	F1	POP1B	1996-12-17 12:00:00	Yes
Achatinella	fuscobasis	0	1995	1995-01-31	1994-03-05 05:38:49	1994	9.64	Keiki	5.64	0.908944	8.16	F1	POP 2	1998-03-04 05:38:49	No
Achatinella	fuscobasis	0	1995	1995-07-05	1994-11-09 08:28:14	1994	8.04	Keiki	4.04	0.651088	7.78	F1		1998-11-08 08:28:14	No
Achatinella	fuscobasis	0	2000	2000-08-03	1994-05-09 12:00:00	1994	17.65	NonKeiki	7.65	6.23973	11.1	F1	POP1A	1997-11-07	Yes
Achatinella	fuscobasis	0	1995	1995-02-16	1995-02-16	1995	3.2	Keiki	0	0	3.61	F1	POP 2	1999-02-15	No
Achatinella	fuscobasis	0	1995	1995-03-16	1995-03-16	1995	2.03	Keiki	0	0	2	F1	POP2 Adult B	1999-03-15	No
Achatinella	fuscobasis	0	1995	1995-04-30	1995-03-15 02:49:24	1995	4.78	Keiki	0.78	0.125705	3.99	F1	POP1A Keiki	1999-03-14 02:49:24	No
Achatinella	fuscobasis	0	1995	1995-05-15	1995-05-10 07:03:31	1995	4.08	Keiki	0.08	0.0128928	4.05	F1	POP1	1999-05-09 07:03:31	No
Achatinella	fuscobasis	0	1995	1995-07-05	1995-07-05	1995	3.01	Keiki	0	0	2.99	F1	POP2 Adult B	1999-07-04	No
Achatinella	fuscobasis	0	1995	1995-08-31	1995-08-31	1995	2.78	Keiki	0	0	2	F1		1999-08-30	No
Achatinella	fuscobasis	0	1995	1995-08-31	1995-08-31	1995	3	Keiki	0	0	2.89	F1		1999-08-30	No
Achatinella	fuscobasis	0	1995	1995-10-16	1995-10-16	1995	3.56	Keiki	0	0	3.03	F1	POP2 Adult B	1999-10-15	No
Achatinella	fuscobasis	0	1996	1996-03-04	1995-05-16 01:24:42	1995	8.98	Keiki	4.98	0.802579	6.67	F1		1999-05-15 01:24:42	No
Achatinella	fuscobasis	0	1997	1997-10-13	1995-05-22	1995	12.55	NonKeiki	2.55	2.39726	10.83	F1	POP1A	1999-05-21	No
Achatinella	fuscobasis	0	2001	2001-03-12	1995-04-20 12:00:00	1995	17.15	NonKeiki	7.15	5.89726	10.73	F1	POP1B	1998-10-19	Yes
Achatinella	fuscobasis	0	2001	2001-03-12	1995-01-23	1995	17.5	NonKeiki	7.5	6.13699	11.65	F1	POP1B	1998-07-23 12:00:00	Yes
Achatinella	fuscobasis	79	2001	2001-03-27	1995-03-19	1995	17.34	NonKeiki	7.34	6.0274	11.34	F1	POP2 Adult	1998-09-16 12:00:00	Yes
Achatinella	fuscobasis	74	2001	2001-05-10	1995-11-18 14:24:00	1995	16.81	NonKeiki	6.81	5.47781	10.24	F1	POP2	1999-05-19 02:24:00	Yes
Achatinella	fuscobasis	84	2001	2001-08-03	1995-05-14 12:00:00	1995	17.63	NonKeiki	7.63	6.22603	10.56	F1	POP2 Adult	1998-11-12	Yes
Achatinella	fuscobasis	65	2001	2001-09-26	1995-10-28	1995	17.18	NonKeiki	7.18	5.91781	10.72	F1	POP1A	1999-04-27 12:00:00	Yes
Achatinella	fuscobasis	116	2001	2001-11-20	1995-06-20	1995	17.92	NonKeiki	7.92	6.42466	11.16	F1	POP2 Adult	1998-12-18 12:00:00	Yes
Achatinella	fuscobasis	69	2001	2001-12-06	1995-10-14	1995	17.52	NonKeiki	7.52	6.15068	11.59	F1	POP 2	1999-04-13 12:00:00	Yes
Achatinella	fuscobasis	0	1998	1998-05-11	1996-07-27	1996	11.44	NonKeiki	1.44	1.78904	8.38	F1	POP1B	2000-07-26	No
Achatinella	fuscobasis	83	2001	2001-08-03	1996-03-30 14:24:00	1996	16.61	NonKeiki	6.61	5.3463	11	F1	POP 2	1999-09-29 02:24:00	Yes
Achatinella	fuscobasis	68	2001	2001-09-11	1996-03-28 19:12:00	1996	16.78	NonKeiki	6.78	5.45808	15	F1	POP1A	1999-09-27 07:12:00	Yes
Achatinella	fuscobasis	77	2001	2001-10-23	1996-07-16	1996	16.5	NonKeiki	6.5	5.27397	10.35	F1	POP2 Adult	2000-01-14 12:00:00	Yes
Achatinella	fuscobasis	0	2001	2001-12-06	1996-05-15 09:36:00	1996	16.94	NonKeiki	6.94	5.56329	9.91	F1	1A Adult	1999-11-13 21:36:00	Yes
Achatinella	fuscobasis	64	2002	2002-01-17	1996-04-03	1996	17	NonKeiki	7	5.79452	10.8	F1	POP2 Adult	1999-10-02 12:00:00	Yes
Achatinella	fuscobasis	73	2002	2002-01-30	1996-09-17	1996	16.65	NonKeiki	6.65	5.3726	10.96	F1	POP2 Adult	2000-03-17 12:00:00	Yes
Achatinella	fuscobasis	0	2002	2002-06-04	1996-06-07 12:00:00	1996	17.29	NonKeiki	7.29	5.99315	11.19	F1	1B Wigwam	1999-12-07	Yes
Achatinella	fuscobasis	0	2002	2002-06-07	1996-02-19	1996	17.74	NonKeiki	7.74	6.30137	11.7	F1	POP1A Adult	1999-08-19 12:00:00	Yes
Achatinella	fuscobasis	0	2002	2002-06-17	1996-03-02 12:00:00	1996	17.73	NonKeiki	7.73	6.29452	11.41	F1	POP1A	1999-09-01	Yes
Achatinella	fuscobasis	67	2002	2002-06-17	1996-02-11 12:00:00	1996	17.81	NonKeiki	7.81	6.34932	10.19	F1	1B Sweatlodge	1999-08-12	Yes
Achatinella	fuscobasis	120	2002	2002-09-29	1996-10-25	1996	17.2	NonKeiki	7.2	5.93151	10.96	F1	1A	2000-04-24 12:00:00	Yes
Achatinella	fuscobasis	0	2002	2002-10-25	1996-08-27	1996	17.54	NonKeiki	7.54	6.16438	12.06	F1	POP1A	2000-02-25 12:00:00	Yes
Achatinella	fuscobasis	0	2003	2003-01-16	1996-08-17 12:00:00	1996	17.91	NonKeiki	7.91	6.41781	11.41	F1	POP1A	2000-02-16	Yes
Achatinella	fuscobasis	133	2003	2003-02-14	1996-04-19 04:48:00	1996	18.18	NonKeiki	8.18	6.82685	10.74	F1	1B Sweatlodge	1999-10-18 16:48:00	Yes
Achatinella	fuscobasis	71	2001	2001-08-03	1997-06-20	1997	15.7	NonKeiki	5.7	4.12329	10.75	F2	POP 2	2000-12-18 12:00:00	Yes
Achatinella	fuscobasis	70	2001	2001-08-28	1997-12-12	1997	14.95	NonKeiki	4.95	3.71233	10	F2	POP2 Adult	2001-06-11 12:00:00	Yes
Achatinella	fuscobasis	55	2001	2001-09-11	1997-07-09	1997	15.8	NonKeiki	5.8	4.17808	10.15	F2	POP2 Adult	2001-01-06 12:00:00	Yes
Achatinella	fuscobasis	82	2001	2001-09-23	1997-07-31	1997	15.75	NonKeiki	5.75	4.15068	10.2	F2	POP2 Adult	2001-01-28 12:00:00	Yes
Achatinella	fuscobasis	39	2001	2001-11-20	1997-11-08	1997	15.54	NonKeiki	5.54	4.03562	11.05	F2	1A Adult	2001-05-08 12:00:00	Yes
Achatinella	fuscobasis	54	2001	2001-12-20	1997-04-07	1997	16.15	NonKeiki	6.15	4.70685	10.9	F2	1A Adult	2000-10-05 12:00:00	Yes
Achatinella	fuscobasis	71?	2001	2001-12-20	1997-03-18 04:48:00	1997	16.24	NonKeiki	6.24	4.7611	10.27	F2	POP 2	2000-09-15 16:48:00	Yes
Achatinella	fuscobasis	0	2002	2002-01-03	1997-11-02	1997	15.79	NonKeiki	5.79	4.1726	10.75	F2	POP2 Adult	2001-05-02 12:00:00	Yes
Achatinella	fuscobasis	86	2002	2002-02-27	1997-12-17	1997	15.84	NonKeiki	5.84	4.2	10.63	F2	POP1A	2001-06-16 12:00:00	Yes
Achatinella	fuscobasis	85	2002	2002-03-13	1997-05-09 09:36:00	1997	16.38	NonKeiki	6.38	4.84548	10.5	F2	1A Adult	2000-11-06 21:36:00	Yes
Achatinella	fuscobasis	57	2002	2002-03-25	1997-08-13	1997	16	NonKeiki	6	4.61644	10.45	F2	POP2 Adult	2001-02-10 12:00:00	Yes
Achatinella	fuscobasis	0	2002	2002-04-12	1997-07-29	1997	16.15	NonKeiki	6.15	4.70685	16.54	F2	1A	2001-01-26 12:00:00	Yes
Achatinella	fuscobasis	0	2002	2002-05-22	1997-10-05 14:24:00	1997	16.02	NonKeiki	6.02	4.62849	11.34	F2	POP1A	2001-04-05 02:24:00	Yes
Achatinella	fuscobasis	61	2002	2002-06-18	1997-01-31 14:24:00	1997	16.66	NonKeiki	6.66	5.37918	11.31	F2	POP2	2000-08-01 02:24:00	Yes
Achatinella	fuscobasis	100	2002	2002-10-28	1997-04-06 09:36:00	1997	16.94	NonKeiki	6.94	5.56329	10.47	F2	POP2	2000-10-04 21:36:00	Yes
Achatinella	fuscobasis	0	2002	2002-11-21	1997-12-26 09:36:00	1997	16.48	NonKeiki	6.48	4.90575	10.86	F2	POP1A Keiki	2001-06-25 21:36:00	Yes
Achatinella	fuscobasis	126	2003	2003-01-13	1997-01-21 12:00:00	1997	17.27	NonKeiki	7.27	5.97945	12.04	F2	1B Wigwam	2000-07-22	Yes
Achatinella	fuscobasis	127	2003	2003-01-30	1997-09-02 14:24:00	1997	16.71	NonKeiki	6.71	5.41205	10.89	F2	None	2001-03-03 02:24:00	Yes
Achatinella	fuscobasis	128	2003	2003-02-13	1997-08-11 14:24:00	1997	16.86	NonKeiki	6.86	5.51068	10.3	F2	POP1A	2001-02-09 02:24:00	Yes
Achatinella	fuscobasis	0	2003	2003-02-14	1997-01-16	1997	17.42	NonKeiki	7.42	6.08219	11.41	F2	POP2 Adult	2000-07-16 12:00:00	Yes
Achatinella	fuscobasis	0	2003	2003-04-07	1997-06-02	1997	17.08	NonKeiki	7.08	5.84932	11.25	F2	POP1A	2000-11-30 12:00:00	Yes
Achatinella	fuscobasis	155	2003	2003-08-11	1997-09-16	1997	17.16	NonKeiki	7.16	5.90411	10.65	F2	1B Sweatlodge	2001-03-16 12:00:00	Yes
Achatinella	fuscobasis	146	2003	2003-09-18	1997-10-24	1997	17.16	NonKeiki	7.16	5.90411	7.8	F2	POP1A	2001-04-23 12:00:00	Yes
Achatinella	fuscobasis	150	2003	2003-09-18	1997-05-29 12:00:00	1997	17.75	NonKeiki	7.75	6.30822	10.3	F2	POP1A	2000-11-27	Yes
Achatinella	fuscobasis	152	2003	2003-10-24	1997-05-28	1997	17.9	NonKeiki	7.9	6.41096	11.4	F2	1B Sweatlodge	2000-11-25 12:00:00	Yes
Achatinella	fuscobasis	0	2003	2003-11-27	1997-11-28	1997	17.3	NonKeiki	7.3	6	10.05	F2	1B Sweatlodge	2001-05-28 12:00:00	Yes
Achatinella	fuscobasis	158	2004	2004-01-13	1997-02-28	1997	18.25	NonKeiki	8.25	6.87671	10.95	F2	POP2 Adult B	2000-08-28 12:00:00	Yes
Achatinella	fuscobasis	142	2004	2004-02-13	1997-06-04	1997	18	NonKeiki	8	6.69863	10.6	F2	POP1A Keiki	2000-12-02 12:00:00	Yes
Achatinella	fuscobasis	0	2004	2004-02-24	1997-12-22	1997	17.56	NonKeiki	7.56	6.17808	12.15	F2	None	2001-06-21 12:00:00	Yes
Achatinella	fuscobasis	0	2004	2004-09-15	1997-10-06	1997	18.35	NonKeiki	8.35	6.94795	16.61	F2	POP2 Adult B	2001-04-05 12:00:00	Yes
Achatinella	fuscobasis	167	2004	2004-10-25	1997-04-23 14:24:00	1997	19.14	NonKeiki	9.14	7.51068	10.95	F2	1A Adult	2000-10-22 02:24:00	Yes
Achatinella	fuscobasis	0	2005	2005-01-18	1997-09-07 14:24:00	1997	18.94	NonKeiki	8.94	7.36822	12.46	F2	POP2 Adult B	2001-03-08 02:24:00	Yes
Achatinella	fuscobasis	72	2001	2001-11-20	1998-10-22	1998	13.8	NonKeiki	3.8	3.08219	10.5	F2	POP2 Adult	2002-10-21	No
Achatinella	fuscobasis	60	2002	2002-01-03	1998-11-25	1998	13.85	NonKeiki	3.85	3.10959	9.8	F2	1B Wigwam	2002-11-24	No
Achatinella	fuscobasis	92	2002	2002-03-15	1998-09-27	1998	14.5	NonKeiki	4.5	3.46575	10.5	F2	POP2	2002-03-27 12:00:00	No
Achatinella	fuscobasis	78	2001	2001-12-06	1998-05-05	1998	14.73	NonKeiki	4.73	3.59178	10.08	F2	1A Adult	2001-11-02 12:00:00	Yes
Achatinella	fuscobasis	62	2002	2002-01-30	1998-05-16	1998	14.95	NonKeiki	4.95	3.71233	10.41	F2	POP2 Adult	2001-11-13 12:00:00	Yes
Achatinella	fuscobasis	90	2002	2002-02-13	1998-05-10	1998	15.05	NonKeiki	5.05	3.76712	10.31	F2	1B Wigwam	2001-11-07 12:00:00	Yes
Achatinella	fuscobasis	76	2002	2002-03-15	1998-06-19	1998	15	NonKeiki	5	3.73973	10.61	F2	POP2 Keiki	2001-12-17 12:00:00	Yes
Achatinella	fuscobasis	63	2002	2002-03-25	1998-01-10	1998	15.85	NonKeiki	5.85	4.20548	9.95	F2	1A	2001-07-10 12:00:00	Yes
Achatinella	fuscobasis	0	2002	2002-04-10	1998-04-24	1998	15.41	NonKeiki	5.41	3.96438	9.8	F2	Wigwam	2001-10-22 12:00:00	Yes
Achatinella	fuscobasis	87	2002	2002-04-12	1998-03-19	1998	15.6	NonKeiki	5.6	4.06849	10.65	F2	POP2	2001-09-16 12:00:00	Yes
Achatinella	fuscobasis	89	2002	2002-04-18	1998-08-30	1998	14.81	NonKeiki	4.81	3.63562	11.08	F2	POP2 Keiki	2002-02-27 12:00:00	Yes
Achatinella	fuscobasis	91	2002	2002-05-09	1998-10-08	1998	14.72	NonKeiki	4.72	3.5863	10.15	F2	1A	2002-04-07 12:00:00	Yes
Achatinella	fuscobasis	0	2002	2002-06-07	1998-05-26	1998	15.54	NonKeiki	5.54	4.03562	11.76	F2	POP2	2001-11-23 12:00:00	Yes
Achatinella	fuscobasis	94	2002	2002-09-13	1998-10-23	1998	15.28	NonKeiki	5.28	3.89315	10.66	F2	POP2 Keiki	2002-04-22 12:00:00	Yes
Achatinella	fuscobasis	118	2002	2002-09-26	1998-02-14	1998	16	NonKeiki	6	4.61644	11.39	F2	1A	2001-08-14 12:00:00	Yes
Achatinella	fuscobasis	0	2002	2002-10-11	1998-09-09	1998	15.64	NonKeiki	5.64	4.09041	10.76	F2	POP2 Adult	2002-03-09 12:00:00	Yes
Achatinella	fuscobasis	95	2002	2002-10-28	1998-07-22	1998	15.97	NonKeiki	5.97	4.27123	10.89	F2	POP2	2002-01-19 12:00:00	Yes
Achatinella	fuscobasis	99	2002	2002-12-18	1998-11-02	1998	15.71	NonKeiki	5.71	4.12877	10.73	F2	Sweatlodge 1B	2002-05-02 12:00:00	Yes
Achatinella	fuscobasis	121	2003	2003-02-27	1998-06-30 09:36:00	1998	16.08	NonKeiki	6.08	4.66466	10.36	F2	POP1A	2001-12-28 21:36:00	Yes
Achatinella	fuscobasis	134	2003	2003-04-07	1998-06-01 04:48:00	1998	16.39	NonKeiki	6.39	4.85151	10.29	F2	POP1A	2001-11-29 16:48:00	Yes
Achatinella	fuscobasis	132	2003	2003-05-28	1998-02-03 14:24:00	1998	16.56	NonKeiki	6.56	5.31342	10.06	F2	1B Sweatlodge	2001-08-04 02:24:00	Yes
Achatinella	fuscobasis	129	2003	2003-06-12	1998-09-03 19:12:00	1998	16.26	NonKeiki	6.26	4.77315	10.85	F2	POP1A Adult	2002-03-04 07:12:00	Yes
Achatinella	fuscobasis	123	2003	2003-06-12	1998-01-06 09:36:00	1998	16.74	NonKeiki	6.74	5.43178	10.35	F2	POP1A Adult	2001-07-06 21:36:00	Yes
Achatinella	fuscobasis	131	2003	2003-06-30	1998-01-02 19:12:00	1998	16.83	NonKeiki	6.83	5.49096	10.7	F2	POP1A Adult	2001-07-03 07:12:00	Yes
Achatinella	fuscobasis	0	2003	2003-07-24	1998-09-19 09:36:00	1998	16.38	NonKeiki	6.38	4.84548	10.21	F2	POP2	2002-03-19 21:36:00	Yes
Achatinella	fuscobasis	139	2003	2003-09-18	1998-04-09 14:24:00	1998	16.76	NonKeiki	6.76	5.44493	10.22	F2	POP1A	2001-10-08 02:24:00	Yes
Achatinella	fuscobasis	151	2003	2003-09-23	1998-03-12	1998	16.9	NonKeiki	6.9	5.53699	11.5	F2	POP1A Keiki	2001-09-09 12:00:00	Yes
Achatinella	fuscobasis	153	2003	2003-10-02	1998-12-16	1998	16.3	NonKeiki	6.3	4.79726	10.75	F2	POP2 Adult	2002-06-15 12:00:00	Yes
Achatinella	fuscobasis	160	2004	2004-04-01	1998-10-13	1998	16.8	NonKeiki	6.8	5.47123	10.6	F2	Sweatlodge	2002-04-12 12:00:00	Yes
Achatinella	fuscobasis	0	2004	2004-04-11	1998-06-24 12:00:00	1998	17.01	NonKeiki	7.01	5.80137	10.05	F2	Sweatlodge	2001-12-23	Yes
Achatinella	fuscobasis	141	2004	2004-05-04	1998-03-14 12:00:00	1998	17.51	NonKeiki	7.51	6.14384	14.9	F2	POP1A Adult	2001-09-12	Yes
Achatinella	fuscobasis	161	2004	2004-06-10	1998-06-12	1998	17.3	NonKeiki	7.3	6	10	F2	POP1A	2001-12-10 12:00:00	Yes
Achatinella	fuscobasis	0	2004	2004-06-10	1998-01-13	1998	17.9	NonKeiki	7.9	6.41096	10.4	F2	POP1A	2001-07-13 12:00:00	Yes
Achatinella	fuscobasis	0	2004	2004-11-04	1998-11-06	1998	17.3	NonKeiki	7.3	6	10.49	F2	POP2 Adult	2002-05-06 12:00:00	Yes
Achatinella	fuscobasis	0	2005	2005-01-04	1998-11-04 12:00:00	1998	17.55	NonKeiki	7.55	6.17123	11.11	F2	POP2 Adult B	2002-05-05	Yes
Achatinella	fuscobasis	175	2005	2005-06-06	1998-12-30	1998	17.94	NonKeiki	7.94	6.43836	10.72	F2	1B Sweatlodge	2002-06-29 12:00:00	Yes
Achatinella	fuscobasis	0	1999	1999-02-16	1999-02-16	1999	2.85	Keiki	0	0	2.8	F2	POP1B	2003-02-15	No
Achatinella	fuscobasis	81	2001	2001-12-04	1999-04-14	1999	13	NonKeiki	3	2.64384	9.5	F2	Wigwam	2003-04-13	No
Achatinella	fuscobasis	80	2002	2002-04-10	1999-07-24	1999	13.13	NonKeiki	3.13	2.71507	9.99	F2	1B Wigwam	2003-07-23	No
Achatinella	fuscobasis	0	2002	2002-05-20	1999-06-10	1999	13.55	NonKeiki	3.55	2.94521	10.76	F2	1B Wigwam	2003-06-09	No
Achatinella	fuscobasis	88	2002	2002-06-06	1999-11-12	1999	12.86	NonKeiki	2.86	2.56712	10.06	F2	1A Keiki	2003-11-11	No
Achatinella	fuscobasis	0	2002	2002-07-02	1999-06-25	1999	13.69	NonKeiki	3.69	3.02192	9.71	F2	1B Wigwam	2003-06-24	No
Achatinella	fuscobasis	0	2002	2002-08-28	1999-11-03	1999	13.32	NonKeiki	3.32	2.81918	10.85	F2	POP1A	2003-11-02	No
Achatinella	fuscobasis	0	2002	2002-10-27	1999-10-10	1999	13.74	NonKeiki	3.74	3.04932	9.68	F2	POP1A Keiki	2003-10-09	No
Achatinella	fuscobasis	0	2003	2003-04-01	1999-11-15	1999	14.34	NonKeiki	4.34	3.37808	10.89	F2	None	2003-05-15 12:00:00	No
Achatinella	fuscobasis	97	2002	2002-10-25	1999-01-25	1999	15.02	NonKeiki	5.02	3.75068	10.96	F2	POP1A	2002-07-25 12:00:00	Yes
Achatinella	fuscobasis	0	2003	2003-04-07	1999-01-19	1999	15.87	NonKeiki	5.87	4.21644	11.19	F2	POP1A	2002-07-19 12:00:00	Yes
Achatinella	fuscobasis	0	2003	2003-06-12	1999-05-21	1999	15.59	NonKeiki	5.59	4.06301	10.2	F2	POP1A Adult	2002-11-18 12:00:00	Yes
Achatinella	fuscobasis	135	2003	2003-06-30	1999-04-27	1999	15.8	NonKeiki	5.8	4.17808	10.17	F2	POP1A Adult	2002-10-25 12:00:00	Yes
Achatinella	fuscobasis	0	2003	2003-08-29	1999-12-23	1999	14.9	NonKeiki	4.9	3.68493	9	F2	POP1A Keiki	2003-06-22 12:00:00	Yes
Achatinella	fuscobasis	148	2003	2003-09-11	1999-11-26	1999	15.1	NonKeiki	5.1	3.79452	10.94	F2	Sweatlodge	2003-05-26 12:00:00	Yes
Achatinella	fuscobasis	154	2003	2003-10-23	1999-11-10	1999	15.39	NonKeiki	5.39	3.95342	9.3	F2	POP1A Adult	2003-05-10 12:00:00	Yes
Achatinella	fuscobasis	0	2004	2004-03-11	1999-12-26	1999	15.86	NonKeiki	5.86	4.21096	10.55	F2	POP1A Adult	2003-06-25 12:00:00	Yes
Achatinella	fuscobasis	0	2004	2004-03-11	1999-05-26	1999	16.3	NonKeiki	6.3	4.79726	8.49	F2	Sweatlodge	2002-11-23 12:00:00	Yes
Achatinella	fuscobasis	0	2004	2004-06-10	1999-02-08	1999	16.6	NonKeiki	6.6	5.33973	9.4	F2	POP1A	2002-08-08 12:00:00	Yes
Achatinella	fuscobasis	0	2004	2004-08-04	1999-04-16	1999	16.55	NonKeiki	6.55	5.30685	10.53	F2	1A Adult	2002-10-14 12:00:00	Yes
Achatinella	fuscobasis	170	2004	2004-08-04	1999-03-27 19:12:00	1999	16.63	NonKeiki	6.63	5.35945	10.43	F2	Sweatlodge	2002-09-25 07:12:00	Yes
Achatinella	fuscobasis	???	2005	2005-01-02	1999-06-10	1999	16.95	NonKeiki	6.95	5.56986	10.8	F2	1B Sweatlodge	2002-12-08 12:00:00	Yes
Achatinella	fuscobasis	UK ends in 1	2005	2005-01-02	1999-06-10	1999	16.95	NonKeiki	6.95	5.56986	10.8	F2	1B Sweatlodge	2002-12-08 12:00:00	Yes
Achatinella	fuscobasis	186	2005	2005-01-18	1999-08-08 04:48:00	1999	16.77	NonKeiki	6.77	5.45151	9.75	F2	POP2 Adult B	2003-02-05 16:48:00	Yes
Achatinella	fuscobasis	0	2005	2005-02-13	1999-09-20	1999	16.7	NonKeiki	6.7	5.40548	10.85	F2	Wigwam	2003-03-20 12:00:00	Yes
Achatinella	fuscobasis	188	2005	2005-02-23	1999-10-07 04:48:00	1999	16.67	NonKeiki	6.67	5.38575	10.79	F2	POP2 Keiki	2003-04-06 16:48:00	Yes
Achatinella	fuscobasis	187	2005	2005-05-18	1999-07-19	1999	17.06	NonKeiki	7.06	5.83562	11.56	F2	POP2 Keiki	2003-01-16 12:00:00	Yes
Achatinella	fuscobasis	0	2005	2005-06-01	1999-11-04 14:24:00	1999	16.96	NonKeiki	6.96	5.57644	10.49	F2	Wigwam	2003-05-05 02:24:00	Yes
Achatinella	fuscobasis	178	2005	2005-06-01	1999-06-05 12:00:00	1999	17.29	NonKeiki	7.29	5.99315	10.68	F2	Wigwam	2002-12-04	Yes
Achatinella	fuscobasis	0	2005	2005-08-29	1999-11-14	1999	17	NonKeiki	7	5.79452	10.3	F2	1B Sweatlodge	2003-05-14 12:00:00	Yes
Achatinella	fuscobasis	238	2005	2005-08-29	1999-07-24 12:00:00	1999	17.45	NonKeiki	7.45	6.10274	10.6	F2	POP1A Adult	2003-01-22	Yes
Achatinella	fuscobasis	0	2006	2006-07-12	1999-09-20 09:36:00	1999	18.16	NonKeiki	8.16	6.8126	11.6	F2	OpenSpaces	2003-03-20 21:36:00	Yes
Achatinella	fuscobasis	0	2007	2007-01-17	1999-12-27 09:36:00	1999	18.51	NonKeiki	8.51	7.06192	11.09	F2	POP1A Keiki	2003-06-26 21:36:00	Yes
Achatinella	fuscobasis	0	2000	2000-08-03	2000-08-03	2000	3.4	Keiki	0	0	3	F2	POP1A	2004-08-02	No
Achatinella	fuscobasis	0	2000	2000-08-19	2000-03-19 01:24:42	2000	6.6	Keiki	2.6	0.419017	10.8	F2	POP1B	2004-03-18 01:24:42	No
Achatinella	fuscobasis	0	2001	2001-02-13	2000-12-15 14:07:03	2000	5.01	Keiki	1.01	0.162772	4.8	F2	POP2 Keiki	2004-12-14 14:07:03	No
Achatinella	fuscobasis	0	2001	2001-10-11	2000-08-02	2000	10.35	NonKeiki	0.35	1.19178	8.3	F2	POP 2	2004-08-01	No
Achatinella	fuscobasis	0	2002	2002-02-13	2000-11-13	2000	10.46	NonKeiki	0.46	1.25205	9.05	F2	1B Wigwam	2004-11-12	No
Achatinella	fuscobasis	66	2002	2002-03-25	2000-07-18	2000	11.25	NonKeiki	1.25	1.68493	8.28	F2	Wigwam	2004-07-17	No
Achatinella	fuscobasis	0	2002	2002-06-04	2000-07-23	2000	11.58	NonKeiki	1.58	1.86575	9.04	F2	1B Wigwam	2004-07-22	No
Achatinella	fuscobasis	56	2002	2002-06-17	2000-09-08	2000	11.41	NonKeiki	1.41	1.7726	8.81	F2	1B Sweatlodge	2004-09-07	No
Achatinella	fuscobasis	0	2002	2002-09-26	2000-07-13	2000	12.2	NonKeiki	2.2	2.20548	9.85	F2	POP1A	2004-07-12	No
Achatinella	fuscobasis	138	2003	2003-01-13	2000-05-23	2000	13	NonKeiki	3	2.64384	9.39	F2	1B Wigwam	2004-05-22	No
Achatinella	fuscobasis	145	2003	2003-01-15	2000-09-12	2000	12.45	NonKeiki	2.45	2.34247	8.61	F2	POP1A	2004-09-11	No
Achatinella	fuscobasis	0	2003	2003-02-14	2000-04-05	2000	13.4	NonKeiki	3.4	2.86301	10.26	F2	POP2 Adult	2004-04-04	No
Achatinella	fuscobasis	0	2003	2003-02-14	2000-04-05	2000	13.4	NonKeiki	3.4	2.86301	10.26	F2	POP2 Adult B	2004-04-04	No
Achatinella	fuscobasis	0	2003	2003-04-06	2000-07-27	2000	13.09	NonKeiki	3.09	2.69315	9.9	F2	POP1A Keiki	2004-07-26	No
Achatinella	fuscobasis	130	2003	2003-07-24	2000-04-17	2000	14.14	NonKeiki	4.14	3.26849	10.32	F2	POP2	2004-04-16	No	Y
Achatinella	fuscobasis	0	2003	2003-11-19	2000-10-30	2000	13.75	NonKeiki	3.75	3.05479	9.81	F2	POP1A Keiki	2004-10-29	No
Achatinella	fuscobasis	0	2004	2004-04-01	2000-12-13	2000	14.2	NonKeiki	4.2	3.30137	10.3	F2	POP2 Adult B	2004-06-12 12:00:00	No
Achatinella	fuscobasis	0	2003	2003-09-16	2000-03-08	2000	14.61	NonKeiki	4.61	3.52603	10.05	F2	POP2 Adult B	2003-09-06 12:00:00	Yes	Y
Achatinella	fuscobasis	140	2003	2003-09-18	2000-03-12	2000	14.6	NonKeiki	4.6	3.52055	8.99	F2	POP1A	2003-09-10 12:00:00	Yes
Achatinella	fuscobasis	159	2004	2004-01-13	2000-02-16	2000	15.31	NonKeiki	5.31	3.90959	9.68	F2	POP2 Adult B	2003-08-16 12:00:00	Yes	Y
Achatinella	fuscobasis	0	2004	2004-05-11	2000-05-05	2000	15.51	NonKeiki	5.51	4.01918	11.53	F2	POP1A Adult	2003-11-03 12:00:00	Yes
Achatinella	fuscobasis	149	2004	2004-05-11	2000-03-28	2000	15.7	NonKeiki	5.7	4.12329	11.51	F2	POP1A Adult	2003-09-26 12:00:00	Yes
Achatinella	fuscobasis	0	2004	2004-12-07	2000-03-25	2000	16.15	NonKeiki	6.15	4.70685	15.05	F2	POP2 Adult	2003-09-23 12:00:00	Yes
Achatinella	fuscobasis	307	2004	2004-12-20	2000-12-06	2000	15.55	NonKeiki	5.55	4.0411	9.45	F2	POP1A Keiki	2004-06-05 12:00:00	Yes
Achatinella	fuscobasis	0	2005	2005-01-31	2000-05-30	2000	16.1	NonKeiki	6.1	4.67671	10	F2	1B Sweatlodge	2003-11-28 12:00:00	Yes
Achatinella	fuscobasis	0	2005	2005-02-01	2000-11-15	2000	15.87	NonKeiki	5.87	4.21644	9.7	F2	POP1A Keiki	2004-05-15 12:00:00	Yes
Achatinella	fuscobasis	172	2005	2005-03-09	2000-12-03	2000	15.96	NonKeiki	5.96	4.26575	10.6	F2	POP2 Keiki	2004-06-02 12:00:00	Yes
Achatinella	fuscobasis	177	2005	2005-03-23	2000-05-01 19:12:00	2000	16.46	NonKeiki	6.46	4.8937	10.47	F2	POP2 Keiki	2003-10-31 07:12:00	Yes
Achatinella	fuscobasis	182	2005	2005-03-28	2000-07-16 04:48:00	2000	16.14	NonKeiki	6.14	4.70082	10.98	F2	POP1A Keiki	2004-01-14 16:48:00	Yes
Achatinella	fuscobasis	185	2005	2005-04-12	2000-07-26 19:12:00	2000	16.16	NonKeiki	6.16	4.71288	10.65	F2	POP2 Adult B	2004-01-25 07:12:00	Yes
Achatinella	fuscobasis	181	2005	2005-06-06	2000-09-11	2000	16.2	NonKeiki	6.2	4.73699	10.2	F2	POP1A Keiki	2004-03-11 12:00:00	Yes
Achatinella	fuscobasis	0	2005	2005-06-21	2000-10-18	2000	16.1	NonKeiki	6.1	4.67671	12.26	F2	POP2 Adult	2004-04-17 12:00:00	Yes
Achatinella	fuscobasis	184	2005	2005-06-28	2000-02-09 04:48:00	2000	16.67	NonKeiki	6.67	5.38575	10.08	F2	Wigwam	2003-08-09 16:48:00	Yes
Achatinella	fuscobasis	231	2005	2005-07-26	2000-01-01	2000	16.95	NonKeiki	6.95	5.56986	10.39	F2	POP2 Keiki	2003-07-01 12:00:00	Yes
Achatinella	fuscobasis	206	2005	2005-08-09	2000-09-20	2000	16.45	NonKeiki	6.45	4.88767	10.06	F2	POP2 Keiki	2004-03-20 12:00:00	Yes
Achatinella	fuscobasis	253	2005	2005-09-12	2000-03-13	2000	16.85	NonKeiki	6.85	5.50411	10.89	F2	1B Sweatlodge	2003-09-11 12:00:00	Yes
Achatinella	fuscobasis	251	2005	2005-09-28	2000-03-17	2000	16.9	NonKeiki	6.9	5.53699	9.9	F2	POP2 Adult	2003-09-15 12:00:00	Yes
Achatinella	fuscobasis	0	2006	2006-01-05	2000-07-06	2000	16.85	NonKeiki	6.85	5.50411	9.23	F2	POP1A Adult	2004-01-04 12:00:00	Yes
Achatinella	fuscobasis	0	2006	2006-01-05	2000-03-02	2000	17.08	NonKeiki	7.08	5.84932	10	F2	1B Sweatlodge	2003-08-31 12:00:00	Yes
Achatinella	fuscobasis	241	2006	2006-01-17	2000-06-24	2000	16.95	NonKeiki	6.95	5.56986	10.56	F2	POP1A Adult	2003-12-23 12:00:00	Yes
Achatinella	fuscobasis	220	2006	2006-03-09	2000-02-14	2000	17.4	NonKeiki	7.4	6.06849	9.56	F2	Wigwam	2003-08-14 12:00:00	Yes
Achatinella	fuscobasis	228	2006	2006-04-19	2000-02-20	2000	17.54	NonKeiki	7.54	6.16438	10.02	F2	Wigwam	2003-08-20 12:00:00	Yes
Achatinella	fuscobasis	0	2006	2006-06-19	2000-08-09	2000	17.1	NonKeiki	7.1	5.86301	9.88	F2	POP1A Keiki	2004-02-07 12:00:00	Yes
Achatinella	fuscobasis	0	2006	2006-09-02	2000-11-17	2000	17	NonKeiki	7	5.79452	10.8	F2	POP2 Keiki	2004-05-17 12:00:00	Yes
Achatinella	fuscobasis	265	2007	2007-06-04	2000-06-29 04:48:00	2000	18.33	NonKeiki	8.33	6.9337	10.81	F2	POP1A Keiki	2003-12-28 16:48:00	Yes
Achatinella	fuscobasis	0	2001	2001-01-03	2001-01-03	2001	3.84	Keiki	0	0	3.75	F2	POP 2	2005-01-02	No
Achatinella	fuscobasis	113	2001	2001-01-18	2001-01-12 02:49:24	2001	4.1	Keiki	0.1	0.016116	3.59	F2	POP1A	2005-01-11 02:49:24	No
Achatinella	fuscobasis	0	2001	2001-02-14	2001-02-14	2001	3.15	Keiki	0	0	3	F2	POP1 Keiki	2005-02-13	No
Achatinella	fuscobasis	0	2001	2001-02-27	2001-02-27	2001	2.87	Keiki	0	0	2.8	F2	POP1A Adult	2005-02-26	No
Achatinella	fuscobasis	0	2001	2001-03-12	2001-03-12	2001	3.9	Keiki	0	0	4.21	F2	1A Keiki	2005-03-11	No
Achatinella	fuscobasis	0	2001	2001-03-12	2001-02-17 01:24:42	2001	4.39	Keiki	0.39	0.0628525	4.91	F2	POP1A Keiki	2005-02-16 01:24:42	No
Achatinella	fuscobasis	0	2001	2001-03-23	2001-03-23	2001	3.4	Keiki	0	0	3.3	F2	POP 2	2005-03-22	No
Achatinella	fuscobasis	0	2001	2001-03-27	2001-02-16 18:21:10	2001	4.65	Keiki	0.65	0.104754	4.5	F2	1A Keiki	2005-02-15 18:21:10	No
Achatinella	fuscobasis	0	2001	2001-04-01	2001-04-01	2001	3.9	Keiki	0	0	3.7	F2	Sweatlodge	2005-03-31	No
Achatinella	fuscobasis	0	2001	2001-04-10	2001-04-07 01:24:42	2001	4.05	Keiki	0.05	0.00805802	3.99	F2	1A Keiki	2005-04-06 01:24:42	No
Achatinella	fuscobasis	12	2001	2001-04-10	2001-03-08 15:31:45	2001	4.55	Keiki	0.55	0.0886382	4	F2	1A Keiki	2005-03-07 15:31:45	No
Achatinella	fuscobasis	0	2001	2001-04-23	2001-03-22 19:45:52	2001	4.53	Keiki	0.53	0.085415	4.44	F2	POP1A Keiki	2005-03-21 19:45:52	No
Achatinella	fuscobasis	18	2001	2001-04-24	2001-03-30 21:10:35	2001	4.41	Keiki	0.41	0.0660757	4.3	F2	POP 2	2005-03-29 21:10:35	No
Achatinella	fuscobasis	17	2001	2001-04-24	2001-03-16 18:21:10	2001	4.65	Keiki	0.65	0.104754	4.35	F2	POP 2	2005-03-15 18:21:10	No
Achatinella	fuscobasis	16	2001	2001-04-24	2001-03-05 14:07:03	2001	4.84	Keiki	0.84	0.135375	4.64	F2	POP2 Keiki	2005-03-04 14:07:03	No
Achatinella	fuscobasis	0	2001	2001-05-10	2001-05-10	2001	3.9	Keiki	0	0	3.54	F2	POP2 Adult B	2005-05-09	No
Achatinella	fuscobasis	11	2001	2001-05-23	2001-05-20 01:24:42	2001	4.05	Keiki	0.05	0.00805802	4	F2	1A Keiki	2005-05-19 01:24:42	No
Achatinella	fuscobasis	15	2001	2001-05-24	2001-04-04 14:07:03	2001	4.84	Keiki	0.84	0.135375	4.32	F2	POP2 Keiki	2005-04-03 14:07:03	No
Achatinella	fuscobasis	0	2001	2001-06-05	2001-06-05	2001	3.65	Keiki	0	0	3.65	F2	POP 2	2005-06-04	No
Achatinella	fuscobasis	0	2001	2001-06-05	2001-04-16	2001	4.85	Keiki	0.85	0.136986	4.7	F2	POP1 Keiki	2005-04-15	No
Achatinella	fuscobasis	0	2001	2001-06-07	2001-04-09 04:14:07	2001	5	Keiki	1	0.16116	4.74	F2	None	2005-04-08 04:14:07	No
Achatinella	fuscobasis	0	2001	2001-06-19	2001-03-20 09:52:56	2001	5.54	Keiki	1.54	0.248187	4.71	F2	1A Keiki	2005-03-19 09:52:56	No
Achatinella	fuscobasis	0	2001	2001-07-20	2001-05-05 16:56:28	2001	5.28	Keiki	1.28	0.206285	4.6	F2	POP2 Keiki	2005-05-04 16:56:28	No
Achatinella	fuscobasis	0	2001	2001-08-28	2001-06-30 04:14:07	2001	5	Keiki	1	0.16116	4.75	F2	POP 2	2005-06-29 04:14:07	No
Achatinella	fuscobasis	0	2001	2001-09-11	2001-09-11	2001	3.9	Keiki	0	0	3.8	F2	POP 2	2005-09-10	No
Achatinella	fuscobasis	0	2001	2001-09-13	2001-09-13	2001	3.5	Keiki	0	0	3.55	F2	POP1 Keiki	2005-09-12	No
Achatinella	fuscobasis	104	2001	2001-09-13	2001-07-07 08:28:14	2001	5.15	Keiki	1.15	0.185334	4.73	F2	POP2 Keiki	2005-07-06 08:28:14	No
Achatinella	fuscobasis	0	2001	2001-09-25	2001-05-21 12:42:21	2001	6.15	Keiki	2.15	0.346495	5.05	F2	POP 2	2005-05-20 12:42:21	No
Achatinella	fuscobasis	0	2001	2001-09-27	2001-08-22 16:56:28	2001	4.6	Keiki	0.6	0.0966962	4.44	F2	POP 2	2005-08-21 16:56:28	No
Achatinella	fuscobasis	14	2001	2001-09-27	2001-06-18 09:52:56	2001	5.71	Keiki	1.71	0.275584	5.54	F2	POP2 Keiki	2005-06-17 09:52:56	No
Achatinella	fuscobasis	0	2001	2001-10-08	2001-10-08	2001	2.46	Keiki	0	0	2.3	F2	POP 2	2005-10-07	No
Achatinella	fuscobasis	0	2001	2001-10-23	2001-10-23	2001	1.95	Keiki	0	0	1.84	F2	POP2 Adult	2005-10-22	No
Achatinella	fuscobasis	0	2001	2001-10-23	2001-10-23	2001	2.35	Keiki	0	0	2	F2	POP2 Adult	2005-10-22	No
Achatinella	fuscobasis	10	2001	2001-10-24	2001-10-24	2001	3.8	Keiki	0	0	3.7	F2	1A Adult	2005-10-23	No
Achatinella	fuscobasis	0	2001	2001-11-20	2001-11-07 15:31:45	2001	4.21	Keiki	0.21	0.0338437	4.34	F2	POP2 Adult	2005-11-06 15:31:45	No
Achatinella	fuscobasis	19	2001	2001-12-06	2001-12-06	2001	4	Keiki	0	0	3.5	F2	1A Adult	2005-12-05	No
Achatinella	fuscobasis	0	2001	2001-12-18	2001-11-15 15:31:45	2001	4.55	Keiki	0.55	0.0886382	4.25	F2	1A Keiki	2005-11-14 15:31:45	No
Achatinella	fuscobasis	0	2001	2001-12-18	2001-08-25 07:03:31	2001	5.95	Keiki	1.95	0.314263	5.55	F2	1B Wigwam	2005-08-24 07:03:31	No
Achatinella	fuscobasis	0	2001	2001-12-18	2001-08-03 12:42:21	2001	6.32	Keiki	2.32	0.373892	5.04	F2	1B Wigwam	2005-08-02 12:42:21	No
Achatinella	fuscobasis	13	2001	2001-12-18	2001-05-29 01:24:42	2001	7.45	Keiki	3.45	0.556003	6.4	F2	1B Wigwam	2005-05-28 01:24:42	No
Achatinella	fuscobasis	0	2001	2001-12-18	2001-03-28 07:03:31	2001	8.5	Keiki	4.5	0.725222	6.8	F2	1B Wigwam	2005-03-27 07:03:31	No
Achatinella	fuscobasis	0	2001	2001-12-20	2001-08-19 15:31:45	2001	6.08	Keiki	2.08	0.335214	5.06	F2	POP 2	2005-08-18 15:31:45	No
Achatinella	fuscobasis	22	2001	2001-12-31	2001-10-27 07:03:31	2001	5.1	Keiki	1.1	0.177276	5.1	F2	1B Wigwam	2005-10-26 07:03:31	No
Achatinella	fuscobasis	21	2002	2002-01-03	2001-12-04 14:07:03	2001	4.5	Keiki	0.5	0.0805802	4.36	F2	POP2 Adult	2005-12-03 14:07:03	No
Achatinella	fuscobasis	20	2002	2002-01-03	2001-11-14	2001	4.85	Keiki	0.85	0.136986	4.61	F2	POP2	2005-11-13	No
Achatinella	fuscobasis	0	2002	2002-01-15	2001-08-20 08:28:14	2001	6.51	Keiki	2.51	0.404512	5.73	F2	Wigwam	2005-08-19 08:28:14	No
Achatinella	fuscobasis	0	2002	2002-01-16	2001-12-29 08:28:14	2001	4.3	Keiki	0.3	0.0483481	4.05	F2	1A Adult	2005-12-28 08:28:14	No
Achatinella	fuscobasis	111	2002	2002-01-30	2001-12-28 15:31:45	2001	4.55	Keiki	0.55	0.0886382	4.36	F2	1A Keiki	2005-12-27 15:31:45	No
Achatinella	fuscobasis	115	2002	2002-01-30	2001-12-05 02:49:24	2001	4.95	Keiki	0.95	0.153102	4.5	F2	1A Keiki	2005-12-04 02:49:24	No
Achatinella	fuscobasis	0	2002	2002-01-31	2001-12-26 16:56:28	2001	4.6	Keiki	0.6	0.0966962	4.55	F2	1A Adult	2005-12-25 16:56:28	No
Achatinella	fuscobasis	0	2002	2002-01-31	2001-11-04 22:35:17	2001	5.48	Keiki	1.48	0.238517	4.98	F2	1A Adult	2005-11-03 22:35:17	No
Achatinella	fuscobasis	110	2002	2002-03-15	2001-08-21 02:49:24	2001	7.5	Keiki	3.5	0.564061	6.1	F2	POP2	2005-08-20 02:49:24	No
Achatinella	fuscobasis	58	2002	2002-03-25	2001-01-24	2001	10.3	NonKeiki	0.3	1.16438	7.94	F2	1A	2005-01-23	No
Achatinella	fuscobasis	103	2002	2002-04-12	2001-12-13 14:07:03	2001	6.03	Keiki	2.03	0.327156	5.47	F2	POP1A	2005-12-12 14:07:03	No
Achatinella	fuscobasis	107	2002	2002-04-25	2001-08-14 11:17:38	2001	8.31	Keiki	4.31	0.694601	7.5	F2	POP2	2005-08-13 11:17:38	No
Achatinella	fuscobasis	102	2002	2002-04-25	2001-06-26 01:24:42	2001	9.15	Keiki	5.15	0.829976	7.15	F2	POP2	2005-06-25 01:24:42	No
Achatinella	fuscobasis	101	2002	2002-06-06	2001-09-26 15:31:45	2001	8.29	Keiki	4.29	0.691378	7.52	F2	1A Keiki	2005-09-25 15:31:45	No
Achatinella	fuscobasis	106	2002	2002-07-02	2001-08-13 01:24:42	2001	9.49	Keiki	5.49	0.88477	7.9	F2	1B Sweatlodge	2005-08-12 01:24:42	No
Achatinella	fuscobasis	93	2002	2002-07-18	2001-04-13	2001	10.48	NonKeiki	0.48	1.26301	8.39	F2	POP2 Keiki	2005-04-12	No
Achatinella	fuscobasis	147	2004	2004-01-16	2001-04-06	2001	13.25	NonKeiki	3.25	2.78082	9	F2	POP1A Keiki	2005-04-05	No
Achatinella	fuscobasis	163	2004	2004-06-08	2001-06-19	2001	13.6	NonKeiki	3.6	2.9726	9.7	F2	POP2 Adult	2005-06-18	No
Achatinella	fuscobasis	162	2004	2004-07-14	2001-11-02	2001	13.1	NonKeiki	3.1	2.69863	8.4	F2	1B Sweatlodge	2005-11-01	No
Achatinella	fuscobasis	166	2004	2004-07-19	2001-03-28	2001	14.22	NonKeiki	4.22	3.31233	9.69	F2	POP1A Adult	2004-09-25 12:00:00	No
Achatinella	fuscobasis	172	2004	2004-12-20	2001-07-14	2001	14.45	NonKeiki	4.45	3.43836	10	F2	Sweatlodge	2005-01-11 12:00:00	No
Achatinella	fuscobasis	174	2005	2005-05-12	2001-08-16	2001	15	NonKeiki	5	3.73973	9.1	F2	POP1A Keiki	2005-02-13 12:00:00	Yes
Achatinella	fuscobasis	180	2005	2005-05-17	2001-07-28	2001	15.12	NonKeiki	5.12	3.80548	9.66	F2	Wigwam	2005-01-25 12:00:00	Yes
Achatinella	fuscobasis	0	2005	2005-05-23	2001-06-08	2001	15.4	NonKeiki	5.4	3.9589	10.25	F2	1B Sweatlodge	2004-12-06 12:00:00	Yes
Achatinella	fuscobasis	311	2005	2005-06-20	2001-08-15	2001	15.2	NonKeiki	5.2	3.84932	9.85	F2	1B Sweatlodge	2005-02-12 12:00:00	Yes
Achatinella	fuscobasis	0	2005	2005-06-20	2001-07-06	2001	15.4	NonKeiki	5.4	3.9589	9.45	F2	POP1A Keiki	2005-01-03 12:00:00	Yes
Achatinella	fuscobasis	0	2005	2005-07-11	2001-09-25	2001	15.1	NonKeiki	5.1	3.79452	10.3	F2	POP2 Keiki	2005-03-25 12:00:00	Yes
Achatinella	fuscobasis	0	2005	2005-07-11	2001-06-07	2001	15.65	NonKeiki	5.65	4.09589	10.3	F2	POP2 Keiki	2004-12-05 12:00:00	Yes
Achatinella	fuscobasis	0	2005	2005-07-18	2001-07-10	2001	15.52	NonKeiki	5.52	4.02466	9.84	F2	POP1A Adult	2005-01-07 12:00:00	Yes
Achatinella	fuscobasis	205	2005	2005-08-09	2001-05-17	2001	15.9	NonKeiki	5.9	4.23288	10.2	F2	POP2 Keiki	2004-11-14 12:00:00	Yes
Achatinella	fuscobasis	223	2005	2005-08-15	2001-12-09	2001	14.9	NonKeiki	4.9	3.68493	9.48	F2	1B Sweatlodge	2005-06-08 12:00:00	Yes
Achatinella	fuscobasis	0	2005	2005-08-16	2001-08-14	2001	15.49	NonKeiki	5.49	4.00822	9.54	F2	POP1A Keiki	2005-02-11 12:00:00	Yes
Achatinella	fuscobasis	183	2005	2005-08-25	2001-09-20	2001	15.35	NonKeiki	5.35	3.93151	9.3	F2	POP1A Keiki	2005-03-20 12:00:00	Yes
Achatinella	fuscobasis	204	2005	2005-08-29	2001-07-22	2001	15.67	NonKeiki	5.67	4.10685	9.65	F2	POP1A Adult	2005-01-19 12:00:00	Yes
Achatinella	fuscobasis	247	2005	2005-08-29	2001-06-26	2001	15.8	NonKeiki	5.8	4.17808	9.7	F2	POP1A Adult	2004-12-24 12:00:00	Yes
Achatinella	fuscobasis	258	2005	2005-08-29	2001-06-16	2001	15.85	NonKeiki	5.85	4.20548	10.25	F2	POP2 Adult B	2004-12-14 12:00:00	Yes
Achatinella	fuscobasis	0	2005	2005-10-11	2001-07-19	2001	15.9	NonKeiki	5.9	4.23288	8.9	F2	POP1A Keiki	2005-01-16 12:00:00	Yes
Achatinella	fuscobasis	0	2005	2005-10-24	2001-10-20	2001	15.5	NonKeiki	5.5	4.0137	10.75	F2	POP2 Adult B	2005-04-19 12:00:00	Yes
Achatinella	fuscobasis	224	2005	2005-11-03	2001-12-09	2001	15.3	NonKeiki	5.3	3.90411	9.97	F2	POP2 Keiki	2005-06-08 12:00:00	Yes
Achatinella	fuscobasis	252	2005	2005-11-21	2001-10-28	2001	15.6	NonKeiki	5.6	4.06849	9.5	F2	1B Sweatlodge	2005-04-27 12:00:00	Yes
Achatinella	fuscobasis	0	2005	2005-11-21	2001-01-13	2001	16.4	NonKeiki	6.4	4.85753	10	F2	1B Sweatlodge	2004-07-13 12:00:00	Yes
Achatinella	fuscobasis	243	2005	2005-12-05	2001-12-31	2001	15.35	NonKeiki	5.35	3.93151	9.73	F2	POP1A Adult	2005-06-30 12:00:00	Yes
Achatinella	fuscobasis	259	2005	2005-12-06	2001-12-02	2001	15.5	NonKeiki	5.5	4.0137	9.01	F2	POP1A Keiki	2005-06-01 12:00:00	Yes
Achatinella	fuscobasis	240	2006	2006-01-03	2001-03-30	2001	16.25	NonKeiki	6.25	4.76712	10.3	F2	POP1A Keiki	2004-09-27 12:00:00	Yes
Achatinella	fuscobasis	0	2006	2006-01-13	2001-04-26 14:24:00	2001	16.17	NonKeiki	6.17	4.7189	10.85	F2	OpenSpaces	2004-10-25 02:24:00	Yes
Achatinella	fuscobasis	0	2006	2006-01-27	2001-03-10	2001	16.45	NonKeiki	6.45	4.88767	9.35	F2	Wigwam	2004-09-07 12:00:00	Yes
Achatinella	fuscobasis	0	2006	2006-02-02	2001-12-08	2001	15.76	NonKeiki	5.76	4.15616	10.43	F2	POP2 Adult B	2005-06-07 12:00:00	Yes
Achatinella	fuscobasis	213	2006	2006-02-08	2001-03-22	2001	16.45	NonKeiki	6.45	4.88767	9.8	F2	POP2 Keiki	2004-09-19 12:00:00	Yes
Achatinella	fuscobasis	0	2006	2006-04-05	2001-06-27 19:12:00	2001	16.26	NonKeiki	6.26	4.77315	10.8	F2	POP1A Keiki	2004-12-26 07:12:00	Yes
Achatinella	fuscobasis	0	2006	2006-05-25	2001-08-16 19:12:00	2001	16.26	NonKeiki	6.26	4.77315	10.92	F2	POP2 Adult B	2005-02-14 07:12:00	Yes
Achatinella	fuscobasis	0	2006	2006-09-11	2001-05-23	2001	16.55	NonKeiki	6.55	5.30685	11.5	F2	POP1A Keiki	2004-11-20 12:00:00	Yes
Achatinella	fuscobasis	0	2006	2006-12-06	2001-07-12	2001	16.7	NonKeiki	6.7	5.40548	9.04	F2	POP1A Keiki	2005-01-09 12:00:00	Yes
Achatinella	fuscobasis	0	2007	2007-01-03	2001-07-30 09:36:00	2001	16.74	NonKeiki	6.74	5.43178	9.65	F2	1B Sweatlodge	2005-01-27 21:36:00	Yes
Achatinella	fuscobasis	287	2007	2007-01-11	2001-02-11	2001	17.18	NonKeiki	7.18	5.91781	10.79	F2	POP1A Keiki	2004-08-11 12:00:00	Yes
Achatinella	fuscobasis	293	2007	2007-03-23	2001-03-24	2001	17.3	NonKeiki	7.3	6	11.6	F2	POP2 Keiki	2004-09-21 12:00:00	Yes
Achatinella	fuscobasis	0	2007	2007-07-30	2001-04-22	2001	17.7	NonKeiki	7.7	6.27397	11.35	F2	POP1A Adult	2004-10-20 12:00:00	Yes
Achatinella	fuscobasis	0	2007	2007-08-03	2001-07-12 12:00:00	2001	17.39	NonKeiki	7.39	6.06164	11.66	F2	POP2 Adult B	2005-01-10	Yes
Achatinella	fuscobasis	0	2002	2002-01-03	2002-01-03	2002	3.25	Keiki	0	0	3	F2	1A Adult	2006-01-02	No
Achatinella	fuscobasis	0	2002	2002-01-03	2002-01-03	2002	3.35	Keiki	0	0	3.9	F2	POP2 Adult	2006-01-02	No
Achatinella	fuscobasis	0	2002	2002-01-17	2002-01-17	2002	2.75	Keiki	0	0	2.25	F2	POP2 Adult	2006-01-16	No
Achatinella	fuscobasis	0	2002	2002-02-13	2002-02-13	2002	3.65	Keiki	0	0	3.92	F2	1A Adult	2006-02-12	No
Achatinella	fuscobasis	0	2002	2002-02-13	2002-02-07 02:49:24	2002	4.1	Keiki	0.1	0.016116	4.08	F2	POP2 Adult	2006-02-06 02:49:24	No
Achatinella	fuscobasis	0	2002	2002-02-27	2002-02-09 08:28:14	2002	4.3	Keiki	0.3	0.0483481	4.1	F2	1A Adult	2006-02-08 08:28:14	No
Achatinella	fuscobasis	112	2002	2002-03-13	2002-03-13	2002	3.65	Keiki	0	0	3.68	F2	1A Adult	2006-03-12	No
Achatinella	fuscobasis	0	2002	2002-03-13	2002-03-13	2002	4	Keiki	0	0	3.85	F2	1A Adult	2006-03-12	No
Achatinella	fuscobasis	114	2002	2002-03-15	2002-01-15 04:14:07	2002	5	Keiki	1	0.16116	4.95	F2	POP2	2006-01-14 04:14:07	No
Achatinella	fuscobasis	105	2002	2002-03-18	2002-01-26 09:52:56	2002	4.86	Keiki	0.86	0.138598	4.7	F2	1A Adult	2006-01-25 09:52:56	No
Achatinella	fuscobasis	0	2002	2002-04-12	2002-04-12	2002	3.57	Keiki	0	0	3.37	F2	1A	2006-04-11	No
Achatinella	fuscobasis	108	2002	2002-04-12	2002-04-10 05:38:49	2002	4.03	Keiki	0.03	0.00483481	4.1	F2	POP2	2006-04-09 05:38:49	No
Achatinella	fuscobasis	0	2002	2002-04-12	2002-03-21 19:45:52	2002	4.36	Keiki	0.36	0.0580177	4.08	F2	1A	2006-03-20 19:45:52	No
Achatinella	fuscobasis	0	2002	2002-04-26	2002-04-26	2002	3.12	Keiki	0	0	3.3	F2	1A	2006-04-25	No
Achatinella	fuscobasis	0	2002	2002-05-08	2002-03-24 21:10:35	2002	4.75	Keiki	0.75	0.12087	4.85	F2	POP2 ADULT	2006-03-23 21:10:35	No
Achatinella	fuscobasis	0	2002	2002-05-22	2002-05-22	2002	3.66	Keiki	0	0	4.07	F2	POP2	2006-05-21	No
Achatinella	fuscobasis	0	2002	2002-06-17	2002-04-19 18:21:10	2002	4.99	Keiki	0.99	0.159549	4.58	F2	1B Sweatlodge	2006-04-18 18:21:10	No
Achatinella	fuscobasis	0	2002	2002-06-18	2002-04-30 18:21:10	2002	4.82	Keiki	0.82	0.132151	4.87	F2	POP 2	2006-04-29 18:21:10	No
Achatinella	fuscobasis	0	2002	2002-07-02	2002-06-19 15:31:45	2002	4.21	Keiki	0.21	0.0338437	4.04	F2	1B Sweatlodge	2006-06-18 15:31:45	No
Achatinella	fuscobasis	0	2002	2002-07-17	2002-07-17	2002	3.85	Keiki	0	0	3.71	F2	1B Wigwam	2006-07-16	No
Achatinella	fuscobasis	0	2002	2002-07-17	2002-07-06 09:52:56	2002	4.18	Keiki	0.18	0.0290089	3.36	F2	AdultCage2	2006-07-05 09:52:56	No
Achatinella	fuscobasis	0	2002	2002-08-02	2002-05-08 16:56:28	2002	5.45	Keiki	1.45	0.233683	5.22	F2	POP1A Adult	2006-05-07 16:56:28	No
Achatinella	fuscobasis	117	2002	2002-08-14	2002-04-15 09:52:56	2002	6.05	Keiki	2.05	0.330379	5.7	F2	POP1A Keiki	2006-04-14 09:52:56	No
Achatinella	fuscobasis	0	2002	2002-08-15	2002-06-18 22:35:17	2002	4.97	Keiki	0.97	0.156326	4.66	F2	1B Sweatlodge	2006-06-17 22:35:17	No
Achatinella	fuscobasis	0	2002	2002-08-28	2002-08-28	2002	3.56	Keiki	0	0	3.85	F2	POP1A	2006-08-27	No
Achatinella	fuscobasis	0	2002	2002-08-28	2002-08-28	2002	3.96	Keiki	0	0	4.15	F2	POP1A	2006-08-27	No
Achatinella	fuscobasis	0	2002	2002-09-10	2002-06-23 04:14:07	2002	5.34	Keiki	1.34	0.215955	4.86	F2	POP1A	2006-06-22 04:14:07	No
Achatinella	fuscobasis	0	2002	2002-09-25	2002-09-25	2002	2.45	Keiki	0	0	2.2	F2	1B Sweatlodge	2006-09-24	No
Achatinella	fuscobasis	0	2002	2002-09-26	2002-09-26	2002	2.89	Keiki	0	0	3.18	F2	POP1A	2006-09-25	No
Achatinella	fuscobasis	0	2002	2002-09-26	2002-09-26	2002	3.09	Keiki	0	0	3.4	F2	POP1A	2006-09-25	No
Achatinella	fuscobasis	0	2002	2002-10-10	2002-10-10	2002	3.31	Keiki	0	0	3.67	F2	POP1A	2006-10-09	No
Achatinella	fuscobasis	96	2002	2002-10-10	2002-10-10	2002	4	Keiki	0	0	4	F2	POP1A	2006-10-09	No
Achatinella	fuscobasis	41	2002	2002-10-13	2002-10-13	2002	3.05	Keiki	0	0	3.27	F2	POP2	2006-10-12	No
Achatinella	fuscobasis	98	2002	2002-10-14	2002-10-14	2002	3.06	Keiki	0	0	3.53	F2	Sweatlodge	2006-10-13	No
Achatinella	fuscobasis	0	2002	2002-10-14	2002-06-15 09:52:56	2002	6.05	Keiki	2.05	0.330379	5.05	F2	Sweatlodge	2006-06-14 09:52:56	No
Achatinella	fuscobasis	0	2002	2002-10-25	2002-10-25	2002	3.71	Keiki	0	0	3.72	F2	POP1A	2006-10-24	No
Achatinella	fuscobasis	0	2002	2002-10-27	2002-10-27	2002	3.63	Keiki	0	0	3.14	F2	None	2006-10-26	No
Achatinella	fuscobasis	0	2002	2002-10-27	2002-10-08 18:21:10	2002	4.31	Keiki	0.31	0.0499597	3.94	F2	POP1A Keiki	2006-10-07 18:21:10	No
Achatinella	fuscobasis	0	2002	2002-11-07	2002-11-07	2002	3.31	Keiki	0	0	3.34	F2	1B Sweatlodge	2006-11-06	No
Achatinella	fuscobasis	0	2002	2002-11-07	2002-11-07	2002	3.44	Keiki	0	0	3.3	F2	POP1A Keiki	2006-11-06	No
Achatinella	fuscobasis	0	2002	2002-11-21	2002-11-21	2002	3.26	Keiki	0	0	3.39	F2	POP1A Keiki	2006-11-20	No
Achatinella	fuscobasis	0	2002	2002-11-21	2002-10-30 19:45:52	2002	4.36	Keiki	0.36	0.0580177	4.45	F2	Sweatlodge	2006-10-29 19:45:52	No
Achatinella	fuscobasis	0	2002	2002-11-21	2002-10-19 15:31:45	2002	4.55	Keiki	0.55	0.0886382	4.1	F2	1A Keiki	2006-10-18 15:31:45	No
Achatinella	fuscobasis	0	2002	2002-12-03	2002-11-01 05:38:49	2002	4.54	Keiki	0.54	0.0870266	4.16	F2	POP2	2006-10-31 05:38:49	No
Achatinella	fuscobasis	119	2002	2002-12-06	2002-09-30 12:42:21	2002	5.13	Keiki	1.13	0.182111	4.74	F2	1A Keiki	2006-09-29 12:42:21	No
Achatinella	fuscobasis	0	2002	2002-12-17	2002-12-17	2002	3.51	Keiki	0	0	3.7	F2	POP1A	2006-12-16	No
Achatinella	fuscobasis	0	2002	2002-12-18	2002-12-18	2002	2.71	Keiki	0	0	3.15	F2	1B Sweatlodge	2006-12-17	No
Achatinella	fuscobasis	0	2002	2002-12-18	2002-12-18	2002	2.9	Keiki	0	0	3.07	F2	1B Sweatlodge	2006-12-17	No
Achatinella	fuscobasis	0	2002	2002-12-18	2002-12-17 09:52:56	2002	4.01	Keiki	0.01	0.0016116	3.86	F2	1B Sweatlodge	2006-12-16 09:52:56	No
Achatinella	fuscobasis	0	2002	2002-12-18	2002-12-15 15:31:45	2002	4.04	Keiki	0.04	0.00644641	3.92	F2	POP1A Keiki	2006-12-14 15:31:45	No
Achatinella	fuscobasis	0	2002	2002-12-18	2002-11-16 05:38:49	2002	4.54	Keiki	0.54	0.0870266	4.44	F2	POP1A Keiki	2006-11-15 05:38:49	No
Achatinella	fuscobasis	0	2002	2002-12-18	2002-11-12 02:49:24	2002	4.61	Keiki	0.61	0.0983078	4.51	F2	POP1A Keiki	2006-11-11 02:49:24	No
Achatinella	fuscobasis	104	2002	2002-12-18	2002-11-05 15:31:45	2002	4.72	Keiki	0.72	0.116035	4.17	F2	1A Keiki	2006-11-04 15:31:45	No
Achatinella	fuscobasis	0	2002	2002-12-29	2002-12-29	2002	3.49	Keiki	0	0	3.57	F2	1B Sweatlodge	2006-12-28	No
Achatinella	fuscobasis	0	2002	2002-12-29	2002-12-29	2002	3.93	Keiki	0	0	4.05	F2	POP1A Keiki	2006-12-28	No
Achatinella	fuscobasis	32	2003	2003-01-16	2002-07-03 12:42:21	2002	7.34	Keiki	3.34	0.538276	6.47	F2	None	2006-07-02 12:42:21	No
Achatinella	fuscobasis	137	2003	2003-01-16	2002-03-29 01:24:42	2002	8.98	Keiki	4.98	0.802579	3.02	F2	None	2006-03-28 01:24:42	No
Achatinella	fuscobasis	125	2003	2003-01-27	2002-05-04 08:28:14	2002	8.55	Keiki	4.55	0.73328	8.06	F2	None	2006-05-03 08:28:14	No
Achatinella	fuscobasis	0	2003	2003-01-28	2002-12-09	2002	4.85	Keiki	0.85	0.136986	4.81	F2	POP2	2006-12-08	No
Achatinella	fuscobasis	0	2003	2003-01-29	2002-12-27 01:24:42	2002	4.56	Keiki	0.56	0.0902498	3.54	F2	POP1A Keiki	2006-12-26 01:24:42	No
Achatinella	fuscobasis	36	2003	2003-02-13	2002-07-23 07:03:31	2002	7.48	Keiki	3.48	0.560838	6.1	F2	POP1A Keiki	2006-07-22 07:03:31	No
Achatinella	fuscobasis	143	2003	2003-02-17	2002-03-15 18:21:10	2002	9.75	Keiki	5.75	0.926672	6.7	F2	POP1A Keiki	2006-03-14 18:21:10	No
Achatinella	fuscobasis	121	2003	2003-02-26	2002-02-08	2002	10.09	NonKeiki	0.09	1.04932	8.7	F2	None	2006-02-07	No
Achatinella	fuscobasis	0	2003	2003-03-12	2002-12-19 15:31:45	2002	5.4	Keiki	1.4	0.225624	4.86	F2	POP1A Keiki	2006-12-18 15:31:45	No
Achatinella	fuscobasis	124	2003	2003-04-06	2002-04-25 02:49:24	2002	9.88	Keiki	5.88	0.947623	8.27	F2	POP1A Keiki	2006-04-24 02:49:24	No
Achatinella	fuscobasis	157	2003	2003-08-28	2002-07-21	2002	10.19	NonKeiki	0.19	1.10411	11.48	F2	POP2	2006-07-20	No
Achatinella	fuscobasis	156	2003	2003-09-10	2002-08-21	2002	10.1	NonKeiki	0.1	1.05479	8.69	F2	POP1A Keiki	2006-08-20	No
Achatinella	fuscobasis	157	2003	2003-09-10	2002-08-11	2002	10.15	NonKeiki	0.15	1.08219	8.8	F2	POP1A Keiki	2006-08-10	No
Achatinella	fuscobasis	0	2003	2003-10-02	2002-01-05	2002	11.35	NonKeiki	1.35	1.73973	9.75	F2	POP2 Adult	2006-01-04	No
Achatinella	fuscobasis	168	2004	2004-09-29	2002-01-08	2002	13.15	NonKeiki	3.15	2.72603	9.09	F2	POP2 Adult B	2006-01-07	No
Achatinella	fuscobasis	0	2004	2004-11-09	2002-12-17	2002	11.64	NonKeiki	1.64	1.89863	10.05	F2	POP2 Adult B	2006-12-16	No
Achatinella	fuscobasis	309	2005	2005-01-02	2002-05-25	2002	12.94	NonKeiki	2.94	2.61096	8.99	F2	1B Sweatlodge	2006-05-24	No
Achatinella	fuscobasis	179	2005	2005-02-15	2002-06-28	2002	12.99	NonKeiki	2.99	2.63836	9.25	F2	POP2 Adult	2006-06-27	No
Achatinella	fuscobasis	0	2005	2005-04-12	2002-08-31	2002	12.95	NonKeiki	2.95	2.61644	9	F2	POP1A Keiki	2006-08-30	No
Achatinella	fuscobasis	0	2005	2005-08-16	2002-09-02	2002	13.57	NonKeiki	3.57	2.95616	9.51	F2	POP1A Keiki	2006-09-01	No
Achatinella	fuscobasis	248	2005	2005-08-16	2002-07-18	2002	13.8	NonKeiki	3.8	3.08219	9.4	F2	POP1A Keiki	2006-07-17	No
Achatinella	fuscobasis	0	2005	2005-08-23	2002-11-18	2002	13.22	NonKeiki	3.22	2.76438	8.93	F2	Wigwam	2006-11-17	No
Achatinella	fuscobasis	0	2005	2005-10-07	2002-07-08	2002	14.11	NonKeiki	4.11	3.25205	9.5	F2	POP2 Keiki C	2006-07-07	No
Achatinella	fuscobasis	217	2005	2005-11-07	2002-09-19	2002	13.9	NonKeiki	3.9	3.13699	9.1	F2	POP1A Adult	2006-09-18	No
Achatinella	fuscobasis	256	2006	2006-01-05	2002-05-31	2002	14.75	NonKeiki	4.75	3.60274	10.22	F2	POP1A Keiki	2005-11-28 12:00:00	Yes
Achatinella	fuscobasis	0	2006	2006-01-05	2002-05-01	2002	14.9	NonKeiki	4.9	3.68493	9.7	F2	POP1A Keiki	2005-10-29 12:00:00	Yes
Achatinella	fuscobasis	218	2006	2006-01-27	2002-02-12	2002	15.4	NonKeiki	5.4	3.9589	9	F2	POP2 Keiki	2005-08-12 12:00:00	Yes
Achatinella	fuscobasis	0	2006	2006-02-02	2002-02-28	2002	15.35	NonKeiki	5.35	3.93151	10.2	F2	POP2 Adult B	2005-08-28 12:00:00	Yes
Achatinella	fuscobasis	0	2006	2006-02-16	2002-06-22	2002	14.85	NonKeiki	4.85	3.65753	9.45	F2	POP2 Adult B	2005-12-20 12:00:00	Yes
Achatinella	fuscobasis	257	2006	2006-02-16	2002-04-23	2002	15.15	NonKeiki	5.15	3.82192	8.9	F2	POP2 Adult B	2005-10-21 12:00:00	Yes
Achatinella	fuscobasis	0	2006	2006-02-21	2002-01-02	2002	15.73	NonKeiki	5.73	4.13973	9.61	F2	POP2 Keiki	2005-07-02 12:00:00	Yes
Achatinella	fuscobasis	0	2006	2006-02-28	2002-01-27	2002	15.64	NonKeiki	5.64	4.09041	9.71	F2	Sweatlodge	2005-07-27 12:00:00	Yes
Achatinella	fuscobasis	236	2006	2006-03-09	2002-03-05	2002	15.5	NonKeiki	5.5	4.0137	8.5	F2	Wigwam	2005-09-02 12:00:00	Yes
Achatinella	fuscobasis	242	2006	2006-05-17	2002-07-06	2002	15.23	NonKeiki	5.23	3.86575	10.57	F2	POP2 Keiki	2006-01-03 12:00:00	Yes
Achatinella	fuscobasis	246	2006	2006-06-14	2002-04-21	2002	15.75	NonKeiki	5.75	4.15068	13.3	F2	OpenSpaces	2005-10-19 12:00:00	Yes	Y
Achatinella	fuscobasis	237	2006	2006-06-14	2002-04-01	2002	15.85	NonKeiki	5.85	4.20548	10.75	F2	OpenSpaces	2005-09-29 12:00:00	Yes
Achatinella	fuscobasis	0	2006	2006-08-17	2002-12-01	2002	14.95	NonKeiki	4.95	3.71233	10.2	F2	POP1A Keiki	2006-05-31 12:00:00	Yes
Achatinella	fuscobasis	254	2006	2006-11-17	2002-02-08 19:12:00	2002	16.26	NonKeiki	6.26	4.77315	10.56	F2	Wigwam	2005-08-09 07:12:00	Yes
Achatinella	fuscobasis	249	2006	2006-12-06	2002-10-07	2002	15.78	NonKeiki	5.78	4.16712	9.79	F2	1B Sweatlodge	2006-04-06 12:00:00	Yes
Achatinella	fuscobasis	298	2007	2007-01-17	2002-05-09 09:36:00	2002	16.13	NonKeiki	6.13	4.69479	10.74	F2	1B Sweatlodge	2005-11-06 21:36:00	Yes
Achatinella	fuscobasis	0	2007	2007-01-17	2002-05-05	2002	16.15	NonKeiki	6.15	4.70685	9.5	F2	1B Sweatlodge	2005-11-02 12:00:00	Yes
Achatinella	fuscobasis	0	2007	2007-01-26	2002-12-29	2002	15.62	NonKeiki	5.62	4.07945	11.15	F2	1B Wigwam	2006-06-28 12:00:00	Yes
Achatinella	fuscobasis	292	2007	2007-02-08	2002-11-26	2002	15.85	NonKeiki	5.85	4.20548	11.25	F2	1B Wigwam	2006-05-26 12:00:00	Yes
Achatinella	fuscobasis	0	2007	2007-02-08	2002-03-22	2002	16.45	NonKeiki	6.45	4.88767	11	F2	1B Wigwam	2005-09-19 12:00:00	Yes
Achatinella	fuscobasis	282	2007	2007-03-02	2002-05-16	2002	16.3	NonKeiki	6.3	4.79726	11.05	F2	POP2 Adult B	2005-11-13 12:00:00	Yes
Achatinella	fuscobasis	0	2007	2007-03-08	2002-06-02	2002	16.25	NonKeiki	6.25	4.76712	11.1	F2	1B Wigwam	2005-11-30 12:00:00	Yes
Achatinella	fuscobasis	270	2007	2007-03-13	2002-06-26 19:12:00	2002	16.16	NonKeiki	6.16	4.71288	9.98	F2	POP1A Keiki	2005-12-25 07:12:00	Yes
Achatinella	fuscobasis	289	2007	2007-04-09	2002-08-08 04:48:00	2002	16.09	NonKeiki	6.09	4.67068	10.5	F2	POP1A Adult	2006-02-05 16:48:00	Yes
Achatinella	fuscobasis	0	2007	2007-05-04	2002-08-17 19:12:00	2002	16.16	NonKeiki	6.16	4.71288	10.96	F2	POP2 Keiki	2006-02-15 07:12:00	Yes
Achatinella	fuscobasis	0	2007	2007-05-17	2002-09-28 09:36:00	2002	16.03	NonKeiki	6.03	4.63452	10.06	F2	POP2 Keiki	2006-03-28 21:36:00	Yes
Achatinella	fuscobasis	0	2007	2007-09-27	2002-05-15	2002	16.65	NonKeiki	6.65	5.3726	11.77	F2	POP2 Adult B	2005-11-12 12:00:00	Yes
Achatinella	fuscobasis	272	2008	2008-02-26	2002-07-31 14:24:00	2002	16.96	NonKeiki	6.96	5.57644	11.56	F2	POP1A Adult	2006-01-29 02:24:00	Yes
Achatinella	fuscobasis	0	2008	2008-02-28	2002-10-13 14:24:00	2002	16.66	NonKeiki	6.66	5.37918	12.04	F2	POP2 Keiki B	2006-04-13 02:24:00	Yes
Achatinella	fuscobasis	0	2008	2008-03-11	2002-09-17 04:48:00	2002	16.82	NonKeiki	6.82	5.48438	13.01	F2	POP2 Adult B 0105	2006-03-17 16:48:00	Yes
Achatinella	fuscobasis	291	2008	2008-03-18	2002-11-06 09:36:00	2002	16.64	NonKeiki	6.64	5.36603	10.56	F2	POP2 Keiki 1204	2006-05-06 21:36:00	Yes
Achatinella	fuscobasis	308	2008	2008-04-14	2002-04-16	2002	17.3	NonKeiki	7.3	6	12.68	F2	POP2 Adult B	2005-10-14 12:00:00	Yes
Achatinella	fuscobasis	0	2008	2008-07-17	2002-07-31 12:00:00	2002	17.25	NonKeiki	7.25	5.96575	10.22	F2	POP2 Adult B	2006-01-29	Yes
Achatinella	fuscobasis	0	2009	2009-01-23	2002-09-12	2002	17.84	NonKeiki	7.84	6.36986	11.08	F2	1B Wigwam	2006-03-12 12:00:00	Yes
Achatinella	fuscobasis	0	2003	2003-01-15	2003-01-15	2003	3.15	Keiki	0	0	3.56	F3	POP2 Adult	2007-01-14	No
Achatinella	fuscobasis	0	2003	2003-01-15	2003-01-09 16:56:28	2003	4.09	Keiki	0.09	0.0145044	3.96	F3	POP2 Adult	2007-01-08 16:56:28	No
Achatinella	fuscobasis	0	2003	2003-01-16	2003-01-16	2003	3	Keiki	0	0	2.98	F3	POP1A	2007-01-15	No
Achatinella	fuscobasis	37	2003	2003-01-16	2003-01-16	2003	3.45	Keiki	0	0	3.91	F3	None	2007-01-15	No
Achatinella	fuscobasis	0	2003	2003-01-16	2003-01-16	2003	3.57	Keiki	0	0	3.56	F3	POP1A	2007-01-15	No
Achatinella	fuscobasis	0	2003	2003-01-28	2003-01-17 09:52:56	2003	4.18	Keiki	0.18	0.0290089	4.53	F3	POP2	2007-01-16 09:52:56	No
Achatinella	fuscobasis	0	2003	2003-01-31	2003-01-30 09:52:56	2003	4.01	Keiki	0.01	0.0016116	4.61	F3	Sweatlodge	2007-01-29 09:52:56	No
Achatinella	fuscobasis	0	2003	2003-02-13	2003-02-13	2003	3.86	Keiki	0	0	3.59	F3	POP1A	2007-02-12	No
Achatinella	fuscobasis	0	2003	2003-02-27	2003-02-27	2003	3.7	Keiki	0	0	3.49	F3	POP1A	2007-02-26	No
Achatinella	fuscobasis	26	2003	2003-03-11	2003-02-27 19:45:52	2003	4.19	Keiki	0.19	0.0306205	3.32	F3	None	2007-02-26 19:45:52	No
Achatinella	fuscobasis	24	2003	2003-03-11	2003-02-09 14:07:03	2003	4.5	Keiki	0.5	0.0805802	3.48	F3	None	2007-02-08 14:07:03	No
Achatinella	fuscobasis	0	2003	2003-03-12	2003-03-12	2003	3.9	Keiki	0	0	4.55	F3	POP1A Keiki	2007-03-11	No
Achatinella	fuscobasis	0	2003	2003-03-18	2003-03-18	2003	2.4	Keiki	0	0	2.18	F3	None	2007-03-17	No
Achatinella	fuscobasis	0	2003	2003-03-19	2003-03-19	2003	1.83	Keiki	0	0	2.52	F3	POP1A	2007-03-18	No
Achatinella	fuscobasis	0	2003	2003-03-19	2003-03-19	2003	2.69	Keiki	0	0	3.51	F3	POP1A	2007-03-18	No
Achatinella	fuscobasis	0	2003	2003-03-19	2003-03-19	2003	3.05	Keiki	0	0	3.17	F3	POP1A	2007-03-18	No
Achatinella	fuscobasis	0	2003	2003-03-27	2003-03-27	2003	2.83	Keiki	0	0	3.15	F3	POP1A	2007-03-26	No
Achatinella	fuscobasis	0	2003	2003-04-06	2003-04-06	2003	2.98	Keiki	0	0	3	F3	Sweatlodge	2007-04-05	No
Achatinella	fuscobasis	0	2003	2003-04-06	2003-04-06	2003	3.27	Keiki	0	0	3.36	F3	Sweatlodge	2007-04-05	No
Achatinella	fuscobasis	0	2003	2003-04-06	2003-04-06	2003	3.32	Keiki	0	0	3.98	F3	POP1A Keiki	2007-04-05	No
Achatinella	fuscobasis	0	2003	2003-04-06	2003-04-06	2003	3.53	Keiki	0	0	3.97	F3	Sweatlodge	2007-04-05	No
Achatinella	fuscobasis	0	2003	2003-04-06	2003-04-06	2003	3.69	Keiki	0	0	3.54	F3	Sweatlodge	2007-04-05	No
Achatinella	fuscobasis	0	2003	2003-04-06	2003-04-06	2003	3.76	Keiki	0	0	4.36	F3	Sweatlodge	2007-04-05	No
Achatinella	fuscobasis	0	2003	2003-04-07	2003-04-07	2003	2.86	Keiki	0	0	2.96	F3	POP1A	2007-04-06	No
Achatinella	fuscobasis	0	2003	2003-04-17	2003-04-17	2003	3	Keiki	0	0	3.16	F3	Sweatlodge	2007-04-16	No
Achatinella	fuscobasis	0	2003	2003-04-17	2003-04-17	2003	3.06	Keiki	0	0	3.44	F3	Sweatlodge	2007-04-16	No
Achatinella	fuscobasis	0	2003	2003-04-17	2003-04-14 15:31:45	2003	4.04	Keiki	0.04	0.00644641	3.86	F3	POP1A Adult	2007-04-13 15:31:45	No
Achatinella	fuscobasis	0	2003	2003-04-17	2003-04-13 11:17:38	2003	4.06	Keiki	0.06	0.00966962	4.04	F3	POP1A Adult	2007-04-12 11:17:38	No
Achatinella	fuscobasis	0	2003	2003-05-01	2003-05-01	2003	2.64	Keiki	0	0	2.83	F3	POP2	2007-04-30	No
Achatinella	fuscobasis	33	2003	2003-05-01	2003-05-01	2003	3.9	Keiki	0	0	4.31	F3	POP2	2007-04-30	No
Achatinella	fuscobasis	0	2003	2003-05-02	2003-05-02	2003	2.44	Keiki	0	0	2.92	F3	1B Sweatlodge	2007-05-01	No
Achatinella	fuscobasis	0	2003	2003-05-02	2003-03-03	2003	5.02	Keiki	1.02	0.164384	4.56	F3	1B Sweatlodge	2007-03-02	No
Achatinella	fuscobasis	136	2003	2003-05-05	2003-02-05 18:21:10	2003	5.5	Keiki	1.5	0.241741	4.9	F3	POP1A Keiki	2007-02-04 18:21:10	No
Achatinella	fuscobasis	0	2003	2003-05-10	2003-05-10	2003	3.52	Keiki	0	0	3.48	F3	None	2007-05-09	No
Achatinella	fuscobasis	0	2003	2003-05-28	2003-05-28	2003	3.52	Keiki	0	0	3.9	F3	Sweatlodge	2007-05-27	No
Achatinella	fuscobasis	0	2003	2003-05-28	2003-05-28	2003	3.89	Keiki	0	0	4	F3	1B Sweatlodge	2007-05-27	No
Achatinella	fuscobasis	0	2003	2003-06-10	2003-06-10	2003	3.09	Keiki	0	0	2.71	F3	1B Wigwam	2007-06-09	No
Achatinella	fuscobasis	0	2003	2003-06-12	2003-06-12	2003	3.32	Keiki	0	0	3.94	F3	Sweatlodge	2007-06-11	No
Achatinella	fuscobasis	0	2003	2003-06-12	2003-06-12	2003	3.34	Keiki	0	0	3.38	F3	POP1A Adult	2007-06-11	No
Achatinella	fuscobasis	0	2003	2003-06-30	2003-06-30	2003	2.73	Keiki	0	0	2.19	F3	POP1A Adult	2007-06-29	No
Achatinella	fuscobasis	0	2003	2003-06-30	2003-06-30	2003	3.32	Keiki	0	0	2.78	F3	1B Sweatlodge	2007-06-29	No
Achatinella	fuscobasis	0	2003	2003-06-30	2003-06-30	2003	3.84	Keiki	0	0	3	F3	1B Sweatlodge	2007-06-29	No
Achatinella	fuscobasis	27	2003	2003-06-30	2003-06-26 11:17:38	2003	4.06	Keiki	0.06	0.00966962	3.24	F3	POP1A Adult	2007-06-25 11:17:38	No
Achatinella	fuscobasis	0	2003	2003-06-30	2003-01-18 15:31:45	2003	6.76	Keiki	2.76	0.444803	4.8	F3	1B Sweatlodge	2007-01-17 15:31:45	No
Achatinella	fuscobasis	0	2003	2003-07-11	2003-07-11	2003	2.45	Keiki	0	0	3.09	F3	POP2	2007-07-10	No
Achatinella	fuscobasis	0	2003	2003-07-11	2003-07-11	2003	3.35	Keiki	0	0	3.75	F3	POP2	2007-07-10	No
Achatinella	fuscobasis	0	2003	2003-07-14	2003-07-14	2003	3.38	Keiki	0	0	3.33	F3	POP1A Adult	2007-07-13	No
Achatinella	fuscobasis	0	2003	2003-07-24	2003-07-24	2003	3.32	Keiki	0	0	2.85	F3	POP2	2007-07-23	No
Achatinella	fuscobasis	30	2003	2003-07-29	2003-07-29	2003	3.85	Keiki	0	0	3.8	F3	1B Sweatlodge	2007-07-28	No
Achatinella	fuscobasis	0	2003	2003-08-05	2003-08-05	2003	3.79	Keiki	0	0	3.24	F3	POP2	2007-08-04	No
Achatinella	fuscobasis	0	2003	2003-08-11	2003-08-11	2003	2.87	Keiki	0	0	2.29	F3	1B Sweatlodge	2007-08-10	No
Achatinella	fuscobasis	43	2003	2003-08-11	2003-08-11	2003	3.48	Keiki	0	0	2.75	F3	1B Sweatlodge	2007-08-10	No
Achatinella	fuscobasis	0	2003	2003-08-29	2003-05-26 07:03:31	2003	5.61	Keiki	1.61	0.259468	4.5	F3	POP1A Keiki	2007-05-25 07:03:31	No
Achatinella	fuscobasis	0	2003	2003-09-06	2003-09-06	2003	3.75	Keiki	0	0	3.3	F3	POP2 Keiki B	2007-09-05	No
Achatinella	fuscobasis	0	2003	2003-09-11	2003-09-11	2003	2.11	Keiki	0	0	1.83	F3	Sweatlodge	2007-09-10	No
Achatinella	fuscobasis	0	2003	2003-09-16	2003-09-16	2003	3.91	Keiki	0	0	3.1	F3	POP2 Keiki B	2007-09-15	No
Achatinella	fuscobasis	0	2003	2003-09-16	2003-05-09 14:07:03	2003	6.2	Keiki	2.2	0.354553	5.8	F3	POP2 Keiki B	2007-05-08 14:07:03	No
Achatinella	fuscobasis	0	2003	2003-09-18	2003-08-04 21:10:35	2003	4.75	Keiki	0.75	0.12087	4.17	F3	POP1A	2007-08-03 21:10:35	No
Achatinella	fuscobasis	42	2003	2003-10-05	2003-10-05	2003	3.41	Keiki	0	0	3.98	F3	POP2 Keiki B	2007-10-04	No
Achatinella	fuscobasis	0	2003	2003-10-10	2003-10-10	2003	2.73	Keiki	0	0	2.46	F3	POP2 Adult B	2007-10-09	No
Achatinella	fuscobasis	0	2003	2003-10-23	2003-10-23	2003	3.44	Keiki	0	0	3.21	F3	POP1A Adult	2007-10-22	No
Achatinella	fuscobasis	0	2003	2003-10-23	2003-10-23	2003	3.67	Keiki	0	0	2.85	F3	POP1A Adult	2007-10-22	No
Achatinella	fuscobasis	34	2003	2003-10-23	2003-10-23	2003	3.9	Keiki	0	0	2.84	F3	POP1A Adult	2007-10-22	No
Achatinella	fuscobasis	0	2003	2003-10-24	2003-10-24	2003	3.8	Keiki	0	0	3.51	F3	1B Sweatlodge	2007-10-23	No
Achatinella	fuscobasis	0	2003	2003-11-06	2003-11-06	2003	3.33	Keiki	0	0	4	F3	1B Sweatlodge	2007-11-05	No
Achatinella	fuscobasis	144	2003	2003-11-19	2003-10-26 11:17:38	2003	4.4	Keiki	0.4	0.0644641	4.38	F3	POP2 Keiki B	2007-10-25 11:17:38	No
Achatinella	fuscobasis	0	2003	2003-11-20	2003-11-20	2003	2.81	Keiki	0	0	2.41	F3	POP2 Adult B	2007-11-19	No
Achatinella	fuscobasis	0	2003	2003-11-20	2003-11-20	2003	3.4	Keiki	0	0	3.2	F3	POP2 Adult B	2007-11-19	No
Achatinella	fuscobasis	0	2003	2003-11-21	2003-11-21	2003	2.69	Keiki	0	0	2.78	F3	POP1A	2007-11-20	No
Achatinella	fuscobasis	0	2003	2003-12-05	2003-12-05	2003	3.1	Keiki	0	0	3	F3	POP2 Keiki B	2007-12-04	No
Achatinella	fuscobasis	0	2003	2003-12-05	2003-12-05	2003	3.21	Keiki	0	0	3.41	F3	POP2 Keiki B	2007-12-04	No
Achatinella	fuscobasis	0	2003	2003-12-05	2003-12-05	2003	3.4	Keiki	0	0	3.95	F3	POP2 Keiki B	2007-12-04	No
Achatinella	fuscobasis	0	2003	2003-12-09	2003-12-09	2003	3.7	Keiki	0	0	3.04	F3	POP1A	2007-12-08	No
Achatinella	fuscobasis	0	2003	2003-12-15	2003-12-15	2003	3.21	Keiki	0	0	2.29	F3	Wigwam	2007-12-14	No
Achatinella	fuscobasis	0	2003	2003-12-17	2003-12-17	2003	3.21	Keiki	0	0	3.18	F3	POP2 Adult B	2007-12-16	No
Achatinella	fuscobasis	0	2003	2003-12-17	2003-11-23 11:17:38	2003	4.4	Keiki	0.4	0.0644641	4.1	F3	POP2 Keiki B	2007-11-22 11:17:38	No
Achatinella	fuscobasis	0	2003	2003-12-29	2003-12-29	2003	3.7	Keiki	0	0	2.83	F3	POP2 Keiki B	2007-12-28	No
Achatinella	fuscobasis	0	2003	2003-12-29	2003-11-29 14:07:03	2003	4.5	Keiki	0.5	0.0805802	3.5	F3	POP2 Keiki B	2007-11-28 14:07:03	No
Achatinella	fuscobasis	0	2004	2004-01-10	2003-12-26 07:03:31	2003	4.25	Keiki	0.25	0.0402901	3.34	F3	Wigwam	2007-12-25 07:03:31	No
Achatinella	fuscobasis	0	2004	2004-01-12	2003-12-16 12:42:21	2003	4.45	Keiki	0.45	0.0725222	4.51	F3	POP2 Keiki	2007-12-15 12:42:21	No
Achatinella	fuscobasis	173	2005	2005-06-15	2003-01-24	2003	12.54	NonKeiki	2.54	2.39178	9.52	F3	Wigwam	2007-01-23	No
Achatinella	fuscobasis	200	2005	2005-06-20	2003-08-05	2003	11.6	NonKeiki	1.6	1.87671	9.85	F3	POP1A Keiki	2007-08-04	No
Achatinella	fuscobasis	0	2005	2005-09-27	2003-05-16	2003	12.5	NonKeiki	2.5	2.36986	7.5	F3	POP2 Adult B	2007-05-15	No
Achatinella	fuscobasis	234	2006	2006-11-01	2003-09-29	2003	13.82	NonKeiki	3.82	3.09315	10.86	F3	OpenSpaces	2007-09-28	No
Achatinella	fuscobasis	245	2006	2006-11-06	2003-10-08	2003	13.8	NonKeiki	3.8	3.08219	10.15	F3	POP1A Adult	2007-10-07	No
Achatinella	fuscobasis	263	2006	2006-11-21	2003-09-13	2003	14	NonKeiki	4	3.19178	9.54	F3	POP2 Adult B	2007-09-12	No
Achatinella	fuscobasis	0	2006	2006-12-06	2003-12-15	2003	13.61	NonKeiki	3.61	2.97808	8.19	F3	POP1A Keiki	2007-12-14	No
Achatinella	fuscobasis	0	2006	2006-12-06	2003-10-18	2003	13.9	NonKeiki	3.9	3.13699	9.04	F3	1B Sweatlodge	2007-10-17	No
Achatinella	fuscobasis	0	2006	2006-12-19	2003-08-14	2003	14.29	NonKeiki	4.29	3.35068	9.01	F3	1B Sweatlodge	2007-02-11 12:00:00	No
Achatinella	fuscobasis	0	2006	2006-12-21	2003-09-07	2003	14.18	NonKeiki	4.18	3.29041	11.64	F3	1B Sweatlodge 1204	2007-03-07 12:00:00	No
Achatinella	fuscobasis	0	2006	2006-12-28	2003-08-21	2003	14.3	NonKeiki	4.3	3.35616	10.2	F3	1B Wigwam	2007-02-18 12:00:00	No
Achatinella	fuscobasis	0	2007	2007-01-02	2003-07-07	2003	14.55	NonKeiki	4.55	3.49315	9.5	F3	POP1A Adult	2007-01-04 12:00:00	No
Achatinella	fuscobasis	0	2006	2006-11-08	2003-01-25	2003	15.09	NonKeiki	5.09	3.78904	10.14	F3	POP1A Keiki	2006-07-25 12:00:00	Yes
Achatinella	fuscobasis	222	2006	2006-12-06	2003-01-31	2003	15.2	NonKeiki	5.2	3.84932	9.78	F3	1B Sweatlodge	2006-07-31 12:00:00	Yes
Achatinella	fuscobasis	0	2006	2006-12-19	2003-03-17	2003	15.04	NonKeiki	5.04	3.76164	10.05	F3	1B Sweatlodge	2006-09-14 12:00:00	Yes
Achatinella	fuscobasis	383	2007	2007-01-02	2003-02-15	2003	15.26	NonKeiki	5.26	3.88219	10.01	F3	POP1A Adult	2006-08-15 12:00:00	Yes
Achatinella	fuscobasis	0	2007	2007-01-03	2003-05-19	2003	14.8	NonKeiki	4.8	3.63014	9.74	F3	1B Sweatlodge	2006-11-16 12:00:00	Yes
Achatinella	fuscobasis	281	2007	2007-01-17	2003-07-10	2003	14.61	NonKeiki	4.61	3.52603	10.72	F3	1B Sweatlodge	2007-01-07 12:00:00	Yes
Achatinella	fuscobasis	0	2007	2007-01-17	2003-05-31	2003	14.81	NonKeiki	4.81	3.63562	10.69	F3	1B Sweatlodge	2006-11-28 12:00:00	Yes
Achatinella	fuscobasis	285	2007	2007-01-30	2003-03-01	2003	15.33	NonKeiki	5.33	3.92055	9.64	F3	POP1A Keiki	2006-08-29 12:00:00	Yes
Achatinella	fuscobasis	295	2007	2007-02-23	2003-01-04	2003	15.73	NonKeiki	5.73	4.13973	9.44	F3	POP2 Keiki	2006-07-04 12:00:00	Yes
Achatinella	fuscobasis	0	2007	2007-02-26	2003-01-27	2003	15.63	NonKeiki	5.63	4.08493	10.26	F3	1B Sweatlodge	2006-07-27 12:00:00	Yes
Achatinella	fuscobasis	301	2007	2007-02-28	2003-07-20	2003	14.77	NonKeiki	4.77	3.6137	10.04	F3	POP2 Keiki B	2007-01-17 12:00:00	Yes
Achatinella	fuscobasis	286	2007	2007-03-13	2003-03-21	2003	15.44	NonKeiki	5.44	3.98082	10.64	F3	POP1A Keiki	2006-09-18 12:00:00	Yes
Achatinella	fuscobasis	283	2007	2007-03-15	2003-06-09	2003	15.05	NonKeiki	5.05	3.76712	11.05	F3	POP2 Adult B	2006-12-07 12:00:00	Yes
Achatinella	fuscobasis	0	2007	2007-07-12	2003-10-08	2003	15.04	NonKeiki	5.04	3.76164	10.28	F3	1B Wigwam	2007-04-07 12:00:00	Yes
Achatinella	fuscobasis	0	2007	2007-09-27	2003-08-10	2003	15.72	NonKeiki	5.72	4.13425	11.48	F3	POP2 Keiki B	2007-02-07 12:00:00	Yes
Achatinella	fuscobasis	0	2007	2007-09-29	2003-08-12	2003	15.72	NonKeiki	5.72	4.13425	11.48	F3	POP2 Keiki B	2007-02-09 12:00:00	Yes
Achatinella	fuscobasis	0	2007	2007-10-12	2003-09-30	2003	15.54	NonKeiki	5.54	4.03562	11.45	F3	POP1A Keiki	2007-03-30 12:00:00	Yes
Achatinella	fuscobasis	0	2007	2007-10-12	2003-08-25	2003	15.72	NonKeiki	5.72	4.13425	11.48	F3	1B Sweatlodge 1204	2007-02-22 12:00:00	Yes
Achatinella	fuscobasis	0	2008	2008-01-07	2003-12-04	2003	15.65	NonKeiki	5.65	4.09589	10.5	F3	POP2 Adult B	2007-06-03 12:00:00	Yes
Achatinella	fuscobasis	299	2008	2008-01-18	2003-11-15	2003	15.8	NonKeiki	5.8	4.17808	10.53	F3	POP2 Keiki B	2007-05-15 12:00:00	Yes
Achatinella	fuscobasis	266	2008	2008-01-18	2003-05-06	2003	16.15	NonKeiki	6.15	4.70685	9.85	F3	POP1A Keiki	2006-11-03 12:00:00	Yes
Achatinella	fuscobasis	0	2008	2008-01-25	2003-11-12	2003	15.85	NonKeiki	5.85	4.20548	10.62	F3	1B Wigwam	2007-05-12 12:00:00	Yes
Achatinella	fuscobasis	284	2008	2008-02-28	2003-05-09 14:24:00	2003	16.32	NonKeiki	6.32	4.80932	10.71	F3	POP2 Keiki B	2006-11-07 02:24:00	Yes
Achatinella	fuscobasis	0	2008	2008-04-04	2003-05-10 09:36:00	2003	16.48	NonKeiki	6.48	4.90575	11.02	F3	POP2 Keiki C	2006-11-07 21:36:00	Yes
Achatinella	fuscobasis	278	2008	2008-08-08	2003-11-11 19:12:00	2003	16.21	NonKeiki	6.21	4.74301	12.36	F3	POP2 Keiki	2007-05-12 07:12:00	Yes
Achatinella	fuscobasis	268	2008	2008-08-21	2003-11-22 14:24:00	2003	16.22	NonKeiki	6.22	4.74904	10.72	F3	POP2 Keiki	2007-05-23 02:24:00	Yes
Achatinella	fuscobasis	275	2008	2008-10-09	2003-11-18 19:12:00	2003	16.46	NonKeiki	6.46	4.8937	10.21	F3	POP2 Adult B	2007-05-19 07:12:00	Yes
Achatinella	fuscobasis	0	2009	2009-02-17	2003-07-18 19:12:00	2003	16.98	NonKeiki	6.98	5.58959	9.96	F3	POP2 Keiki	2007-01-16 07:12:00	Yes
Achatinella	fuscobasis	0	2009	2009-02-19	2003-10-10 09:36:00	2003	16.64	NonKeiki	6.64	5.36603	10.02	F3	POP2 Adult	2007-04-09 21:36:00	Yes
Achatinella	fuscobasis	0	2009	2009-03-12	2003-09-23	2003	16.8	NonKeiki	6.8	5.47123	10.82	F3	OpenSpaces	2007-03-23 12:00:00	Yes
Achatinella	fuscobasis	0	2009	2009-05-21	2003-03-29	2003	17.52	NonKeiki	7.52	6.15068	9.4	F3	1B Wigwam	2006-09-26 12:00:00	Yes
Achatinella	fuscobasis	0	2009	2009-05-29	2003-08-04	2003	17.04	NonKeiki	7.04	5.82192	11.55	F3	1B Sweatlodge	2007-02-01 12:00:00	Yes
Achatinella	fuscobasis	0	2009	2009-08-14	2003-08-16	2003	17.3	NonKeiki	7.3	6	10.61	F3	ADULTS ONLY 2	2007-02-13 12:00:00	Yes
Achatinella	fuscobasis	29	2004	2004-01-05	2004-01-05	2004	4	Keiki	0	0	3.4	F3	1B Wigwam	2008-01-04	No
Achatinella	fuscobasis	0	2004	2004-01-10	2004-01-10	2004	2.71	Keiki	0	0	1.81	F3	Wigwam	2008-01-09	No
Achatinella	fuscobasis	0	2004	2004-01-10	2004-01-10	2004	2.99	Keiki	0	0	2.5	F3	Wigwam	2008-01-09	No
Achatinella	fuscobasis	0	2004	2004-01-10	2004-01-10	2004	3	Keiki	0	0	2.4	F3	Wigwam	2008-01-09	No
Achatinella	fuscobasis	0	2004	2004-01-13	2004-01-13	2004	3.61	Keiki	0	0	3.4	F3	POP2 Adult B	2008-01-12	No
Achatinella	fuscobasis	0	2004	2004-01-22	2004-01-22	2004	2.49	Keiki	0	0	2.1	F3	POP1A Adult	2008-01-21	No
Achatinella	fuscobasis	0	2004	2004-01-30	2004-01-30	2004	1.9	Keiki	0	0	2	F3	POP1A Keiki	2008-01-29	No
Achatinella	fuscobasis	164	2004	2004-02-09	2004-02-09	2004	3.16	Keiki	0	0	2.54	F3	Wigwam	2008-02-08	No
Achatinella	fuscobasis	0	2004	2004-02-24	2004-02-24	2004	2.8	Keiki	0	0	2.8	F3	1B Sweatlodge	2008-02-23	No
Achatinella	fuscobasis	0	2004	2004-03-11	2004-03-11	2004	3.29	Keiki	0	0	2.29	F3	POP1A Adult	2008-03-10	No
Achatinella	fuscobasis	0	2004	2004-03-11	2004-03-11	2004	3.71	Keiki	0	0	2.5	F3	POP1A Adult	2008-03-10	No
Achatinella	fuscobasis	0	2004	2004-03-12	2004-03-12	2004	3.81	Keiki	0	0	3.6	F3	POP2 Adult B	2008-03-11	No
Achatinella	fuscobasis	0	2004	2004-04-01	2004-04-01	2004	4	Keiki	0	0	3.81	F3	POP2 Adult B	2008-03-31	No
Achatinella	fuscobasis	0	2004	2004-04-10	2004-03-08 15:31:45	2004	4.55	Keiki	0.55	0.0886382	3.99	F3	POP2 Adult B	2008-03-07 15:31:45	No
Achatinella	fuscobasis	0	2004	2004-04-12	2004-04-12	2004	3.1	Keiki	0	0	3	F3	1B Sweatlodge	2008-04-11	No
Achatinella	fuscobasis	0	2004	2004-04-20	2004-04-20	2004	2.86	Keiki	0	0	2.3	F3	POP2 Keiki	2008-04-19	No
Achatinella	fuscobasis	31	2004	2004-04-26	2004-04-13 15:31:45	2004	4.21	Keiki	0.21	0.0338437	2.5	F3	POP2 Adult B	2008-04-12 15:31:45	No
Achatinella	fuscobasis	0	2004	2004-05-17	2004-05-17	2004	3.8	Keiki	0	0	3.6	F3	1B Sweatlodge	2008-05-16	No
Achatinella	fuscobasis	0	2004	2004-05-17	2004-03-16 05:38:49	2004	5.05	Keiki	1.05	0.169218	4.95	F3	POP1A Keiki	2008-03-15 05:38:49	No
Achatinella	fuscobasis	0	2004	2004-05-18	2004-05-18	2004	2.9	Keiki	0	0	2.34	F3	Wigwam	2008-05-17	No
Achatinella	fuscobasis	0	2004	2004-05-18	2004-05-18	2004	3.75	Keiki	0	0	3.7	F3	Wigwam	2008-05-17	No
Achatinella	fuscobasis	0	2004	2004-05-18	2004-03-29 14:07:03	2004	4.84	Keiki	0.84	0.135375	4.72	F3	Wigwam	2008-03-28 14:07:03	No
Achatinella	fuscobasis	0	2004	2004-05-18	2004-03-13 02:49:24	2004	5.12	Keiki	1.12	0.1805	4.72	F3	Wigwam	2008-03-12 02:49:24	No
Achatinella	fuscobasis	0	2004	2004-06-08	2004-06-08	2004	2.7	Keiki	0	0	2.21	F3	POP2 Adult B	2008-06-07	No
Achatinella	fuscobasis	0	2004	2004-06-08	2004-06-08	2004	3.5	Keiki	0	0	2.75	F3	POP2 Adult B	2008-06-07	No
Achatinella	fuscobasis	0	2004	2004-06-08	2004-06-08	2004	3.68	Keiki	0	0	2.95	F3	POP2 Adult	2008-06-07	No
Achatinella	fuscobasis	0	2004	2004-06-10	2004-06-10	2004	3.7	Keiki	0	0	2.6	F3	Sweatlodge	2008-06-09	No
Achatinella	fuscobasis	0	2004	2004-06-10	2004-06-04 02:49:24	2004	4.1	Keiki	0.1	0.016116	3.8	F3	Sweatlodge	2008-06-03 02:49:24	No
Achatinella	fuscobasis	0	2004	2004-06-15	2004-06-15	2004	3.2	Keiki	0	0	2.6	F3	Wigwam	2008-06-14	No
Achatinella	fuscobasis	0	2004	2004-06-21	2004-06-21	2004	2.24	Keiki	0	0	2.2	F3	POP1A Adult	2008-06-20	No
Achatinella	fuscobasis	0	2004	2004-07-05	2004-07-05	2004	3.6	Keiki	0	0	2.9	F3	POP1A	2008-07-04	No
Achatinella	fuscobasis	0	2004	2004-07-12	2004-07-12	2004	2.9	Keiki	0	0	2.8	F3	Wigwam	2008-07-11	No
Achatinella	fuscobasis	0	2004	2004-07-14	2004-07-14	2004	2.9	Keiki	0	0	2.8	F3	POP1A Adult	2008-07-13	No
Achatinella	fuscobasis	0	2004	2004-07-14	2004-07-14	2004	2.9	Keiki	0	0	2.8	F3	POP1A Adult	2008-07-13	No
Achatinella	fuscobasis	0	2004	2004-07-14	2004-07-14	2004	3.1	Keiki	0	0	3	F3	POP1B Adult	2008-07-13	No
Achatinella	fuscobasis	0	2004	2004-07-14	2004-07-14	2004	3.8	Keiki	0	0	3.5	F3	1B Sweatlodge	2008-07-13	No
Achatinella	fuscobasis	25	2004	2004-07-27	2004-07-27	2004	2.9	Keiki	0	0	3.7	F3	Wigwam	2008-07-26	No
Achatinella	fuscobasis	0	2004	2004-07-27	2004-07-27	2004	3.6	Keiki	0	0	3.4	F3	POP2 Keiki	2008-07-26	No
Achatinella	fuscobasis	0	2004	2004-08-03	2004-08-03	2004	3.55	Keiki	0	0	3.21	F3	POP2 Adult B	2008-08-02	No
Achatinella	fuscobasis	0	2004	2004-08-05	2004-08-05	2004	3.51	Keiki	0	0	3.02	F3	POP2 Adult B	2008-08-04	No
Achatinella	fuscobasis	0	2004	2004-08-16	2004-08-16	2004	2.95	Keiki	0	0	3.5	F3	Wigwam	2008-08-15	No
Achatinella	fuscobasis	0	2004	2004-08-16	2004-08-16	2004	3.3	Keiki	0	0	3.35	F3	Wigwam	2008-08-15	No
Achatinella	fuscobasis	0	2004	2004-08-16	2004-08-16	2004	3.49	Keiki	0	0	3.75	F3	Wigwam	2008-08-15	No
Achatinella	fuscobasis	0	2004	2004-08-18	2004-08-18	2004	3.42	Keiki	0	0	2.63	F3	POP1A Keiki	2008-08-17	No
Achatinella	fuscobasis	0	2004	2004-08-23	2004-08-17 02:49:24	2004	4.1	Keiki	0.1	0.016116	3.26	F3	1B Wigwam	2008-08-16 02:49:24	No
Achatinella	fuscobasis	35	2004	2004-08-30	2004-08-30	2004	3.43	Keiki	0	0	2.89	F3	POP1A Adult	2008-08-29	No
Achatinella	fuscobasis	0	2004	2004-08-31	2004-08-31	2004	2.65	Keiki	0	0	2.25	F3	POP2 Adult B	2008-08-30	No
Achatinella	fuscobasis	23	2004	2004-09-22	2004-09-22	2004	3.71	Keiki	0	0	3.35	F3	Wigwam	2008-09-21	No
Achatinella	fuscobasis	0	2004	2004-09-22	2004-09-22	2004	3.81	Keiki	0	0	2.78	F3	POP2 Keiki	2008-09-21	No
Achatinella	fuscobasis	0	2004	2004-09-27	2004-09-27	2004	2.8	Keiki	0	0	2.34	F3	1B Sweatlodge	2008-09-26	No
Achatinella	fuscobasis	28	2004	2004-10-01	2004-10-01	2004	3.34	Keiki	0	0	2.95	F3	POP1A Adult	2008-09-30	No
Achatinella	fuscobasis	0	2004	2004-10-04	2004-10-04	2004	3.3	Keiki	0	0	2.85	F3	POP1A Adult	2008-10-03	No
Achatinella	fuscobasis	0	2004	2004-10-05	2004-10-05	2004	2.51	Keiki	0	0	2.1	F3	Wigwam	2008-10-04	No
Achatinella	fuscobasis	0	2004	2004-10-05	2004-10-05	2004	3.25	Keiki	0	0	2.2	F3	Wigwam	2008-10-04	No
Achatinella	fuscobasis	0	2004	2004-10-11	2004-10-11	2004	3	Keiki	0	0	2.6	F3	POP1A Adult	2008-10-10	No
Achatinella	fuscobasis	0	2004	2004-10-11	2004-10-11	2004	3.36	Keiki	0	0	2.44	F3	POP1A Adult	2008-10-10	No
Achatinella	fuscobasis	0	2004	2004-10-25	2004-10-25	2004	3.57	Keiki	0	0	2.83	F3	POP1A Adult	2008-10-24	No
Achatinella	fuscobasis	29	2004	2004-10-26	2004-05-20 04:14:07	2004	6.7	Keiki	2.7	0.435133	4.02	F3	1B Sweatlodge	2008-05-19 04:14:07	No
Achatinella	fuscobasis	0	2004	2004-11-03	2004-11-03	2004	2.91	Keiki	0	0	2.32	F3	Wigwam	2008-11-02	No
Achatinella	fuscobasis	0	2004	2004-11-03	2004-11-03	2004	3.73	Keiki	0	0	3.17	F3	Wigwam	2008-11-02	No
Achatinella	fuscobasis	0	2004	2004-11-08	2004-11-08	2004	2.65	Keiki	0	0	2.14	F3	1B Sweatlodge	2008-11-07	No
Achatinella	fuscobasis	0	2004	2004-11-09	2004-11-09	2004	3.96	Keiki	0	0	2.55	F3	POP2 Adult B	2008-11-08	No
Achatinella	fuscobasis	0	2004	2004-11-13	2004-11-13	2004	3.19	Keiki	0	0	2.58	F3	Wigwam	2008-11-12	No
Achatinella	fuscobasis	308	2004	2004-11-15	2004-03-31 18:21:10	2004	7.88	Keiki	3.88	0.625302	6	F3	Wigwam	2008-03-30 18:21:10	No
Achatinella	fuscobasis	0	2004	2004-11-22	2004-11-22	2004	1	Keiki	0	0	1	F3	POP2 Adult B	2008-11-21	No
Achatinella	fuscobasis	0	2004	2004-11-22	2004-11-22	2004	2.49	Keiki	0	0	1.83	F3	1B Sweatlodge	2008-11-21	No
Achatinella	fuscobasis	0	2004	2004-11-22	2004-11-22	2004	3.01	Keiki	0	0	2.71	F3	1B Sweatlodge	2008-11-21	No
Achatinella	fuscobasis	0	2004	2004-11-22	2004-11-22	2004	3.49	Keiki	0	0	2.73	F3	POP2 Adult B	2008-11-21	No
Achatinella	fuscobasis	0	2004	2004-11-22	2004-11-22	2004	3.95	Keiki	0	0	3.01	F3	POP1A Adult	2008-11-21	No
Achatinella	fuscobasis	0	2004	2004-11-22	2004-10-23	2004	4.51	Keiki	0.51	0.0821918	3.75	F3	POP1A Adult	2008-10-22	No
Achatinella	fuscobasis	0	2004	2004-11-22	2004-10-23	2004	4.51	Keiki	0.51	0.0821918	4.4	F3	POP2 Adult B	2008-10-22	No
Achatinella	fuscobasis	46	2004	2004-11-22	2004-10-17 16:56:28	2004	4.6	Keiki	0.6	0.0966962	3.86	F3	POP1A Adult	2008-10-16 16:56:28	No
Achatinella	fuscobasis	40	2004	2004-11-22	2004-10-17 16:56:28	2004	4.6	Keiki	0.6	0.0966962	3.86	F3	POP1A Adult	2008-10-16 16:56:28	No
Achatinella	fuscobasis	169	2004	2004-11-22	2004-10-08 21:10:35	2004	4.75	Keiki	0.75	0.12087	4.05	F3	POP1A Adult	2008-10-07 21:10:35	No
Achatinella	fuscobasis	0	2004	2004-12-06	2004-12-06	2004	3.07	Keiki	0	0	2.6	F3	Sweatlodge	2008-12-05	No
Achatinella	fuscobasis	165	2004	2004-12-06	2004-12-06	2004	3.47	Keiki	0	0	2.91	F3	Sweatlodge	2008-12-05	No
Achatinella	fuscobasis	30	2004	2004-12-13	2004-12-13	2004	3	Keiki	0	0	2.65	F3	Wigwam	2008-12-12	No
Achatinella	fuscobasis	0	2004	2004-12-15	2004-10-02 11:17:38	2004	5.25	Keiki	1.25	0.20145	2.75	F3	POP2 Keiki	2008-10-01 11:17:38	No
Achatinella	fuscobasis	0	2004	2004-12-20	2004-12-20	2004	2.75	Keiki	0	0	2.43	F3	Sweatlodge	2008-12-19	No
Achatinella	fuscobasis	0	2004	2004-12-20	2004-12-20	2004	3.4	Keiki	0	0	2.55	F3	POP1A Adult	2008-12-19	No
Achatinella	fuscobasis	189	2005	2005-01-24	2004-12-27 22:35:17	2004	4.46	Keiki	0.46	0.0741338	3.68	F3	Wigwam	2008-12-26 22:35:17	No
Achatinella	fuscobasis	194	2005	2005-01-31	2004-04-06	2004	9.1	Keiki	5.1	0.821918	6.6	F3	POP1A Adult	2008-04-05	No
Achatinella	fuscobasis	0	2005	2005-03-09	2004-12-14 07:03:31	2004	5.44	Keiki	1.44	0.232071	3.8	F3	POP2 Keiki	2008-12-13 07:03:31	No
Achatinella	fuscobasis	0	2005	2005-03-28	2004-03-18	2004	10.05	NonKeiki	0.05	1.0274	7.16	F3	1B Sweatlodge	2008-03-17	No
Achatinella	fuscobasis	0	2005	2005-04-21	2004-11-06 16:56:28	2004	6.81	Keiki	2.81	0.452861	4.92	F3	POP2 Keiki 1204	2008-11-05 16:56:28	No
Achatinella	fuscobasis	198	2005	2005-06-06	2004-07-22 18:21:10	2004	9.41	Keiki	5.41	0.871878	7.9	F3	POP1A Keiki	2008-07-21 18:21:10	No
Achatinella	fuscobasis	0	2005	2005-08-29	2004-12-07 07:03:31	2004	8.5	Keiki	4.5	0.725222	7.88	F3	POP2 Adult B	2008-12-06 07:03:31	No
Achatinella	fuscobasis	226	2005	2005-09-13	2004-09-26 05:38:49	2004	9.98	Keiki	5.98	0.963739	7.7	F3	POP1A Keiki	2008-09-25 05:38:49	No
Achatinella	fuscobasis	0	2005	2005-09-28	2004-10-15 22:35:17	2004	9.9	Keiki	5.9	0.950846	8.1	F3	POP2 Adult B	2008-10-14 22:35:17	No
Achatinella	fuscobasis	0	2006	2006-09-11	2004-03-30	2004	12.65	NonKeiki	2.65	2.45205	9.9	F3	POP1A Keiki	2008-03-29	No
Achatinella	fuscobasis	215	2006	2006-10-23	2004-08-29	2004	12.1	NonKeiki	2.1	2.15068	9.55	F3	POP1A Adult	2008-08-28	No
Achatinella	fuscobasis	0	2006	2006-12-21	2004-10-11	2004	12.18	NonKeiki	2.18	2.19452	8.67	F3	1B Sweatlodge 1204	2008-10-10	No
Achatinella	fuscobasis	279	2007	2007-04-05	2004-08-13	2004	13	NonKeiki	3	2.64384	10.15	F3	1B Wigwam	2008-08-12	No
Achatinella	fuscobasis	290	2007	2007-04-16	2004-09-13	2004	12.9	NonKeiki	2.9	2.58904	9.7	F3	POP2 Keiki 1204	2008-09-12	No
Achatinella	fuscobasis	0	2007	2007-05-05	2004-11-25	2004	12.63	NonKeiki	2.63	2.4411	9	F3	1B Wigwam	2008-11-24	No
Achatinella	fuscobasis	0	2007	2007-08-16	2004-02-22	2004	14.53	NonKeiki	4.53	3.48219	10.25	F3	POP2 Keiki B	2007-08-22 12:00:00	No
Achatinella	fuscobasis	0	2007	2007-12-27	2004-12-07	2004	13.75	NonKeiki	3.75	3.05479	10.44	F3	POP2 Keiki 1204	2008-12-06	No
Achatinella	fuscobasis	267	2008	2008-01-18	2004-07-22	2004	14.55	NonKeiki	4.55	3.49315	11.53	F3	1B Sweatlodge	2008-01-20 12:00:00	No
Achatinella	fuscobasis	0	2008	2008-02-09	2004-12-11	2004	13.95	NonKeiki	3.95	3.16438	11.62	F3	POP2 Keiki C	2008-12-10	No
Achatinella	fuscobasis	0	2007	2007-10-05	2004-01-21	2004	14.94	NonKeiki	4.94	3.70685	10.6	F3	POP2 Keiki C	2007-07-21 12:00:00	Yes
Achatinella	fuscobasis	302	2007	2007-12-18	2004-02-24	2004	15.14	NonKeiki	5.14	3.81644	9.59	F3	1B Sweatlodge	2007-08-24 12:00:00	Yes
Achatinella	fuscobasis	0	2008	2008-01-02	2004-04-05	2004	15.01	NonKeiki	5.01	3.74521	10.39	F3	POP2 Keiki	2007-10-04 12:00:00	Yes
Achatinella	fuscobasis	0	2008	2008-01-08	2004-05-31	2004	14.76	NonKeiki	4.76	3.60822	10.25	F3	POP2 Keiki C	2007-11-29 12:00:00	Yes
Achatinella	fuscobasis	0	2008	2008-02-29	2004-02-13	2004	15.56	NonKeiki	5.56	4.04658	11.11	F3	1B Sweatlodge	2007-08-13 12:00:00	Yes
Achatinella	fuscobasis	297	2008	2008-03-07	2004-07-15	2004	14.83	NonKeiki	4.83	3.64658	11.8	F3	POP2 Keiki C	2008-01-13 12:00:00	Yes
Achatinella	fuscobasis	280	2008	2008-03-13	2004-08-28	2004	14.64	NonKeiki	4.64	3.54247	9.26	F3	Sweatlodge 1204	2008-02-26 12:00:00	Yes
Achatinella	fuscobasis	0	2008	2008-03-24	2004-04-21	2004	15.34	NonKeiki	5.34	3.92603	11.88	F3	POP2 Keiki C	2007-10-20 12:00:00	Yes
Achatinella	fuscobasis	0	2008	2008-03-26	2004-06-10	2004	15.1	NonKeiki	5.1	3.79452	9.4	F3	POP2 Keiki B	2007-12-09 12:00:00	Yes
Achatinella	fuscobasis	296	2008	2008-04-22	2004-03-25	2004	15.62	NonKeiki	5.62	4.07945	10.25	F3	POP2 Keiki B	2007-09-23 12:00:00	Yes
Achatinella	fuscobasis	0	2008	2008-04-24	2004-06-07	2004	15.26	NonKeiki	5.26	3.88219	11.02	F3	POP2 Adult B	2007-12-06 12:00:00	Yes
Achatinella	fuscobasis	0	2008	2008-06-02	2004-05-19	2004	15.55	NonKeiki	5.55	4.0411	9.98	F3	POP2 Keiki C	2007-11-17 12:00:00	Yes
Achatinella	fuscobasis	0	2008	2008-06-03	2004-07-09	2004	15.3	NonKeiki	5.3	3.90411	10.03	F3	1B Sweatlodge	2008-01-07 12:00:00	Yes
Achatinella	fuscobasis	0	2008	2008-07-16	2004-06-02	2004	15.7	NonKeiki	5.7	4.12329	9.93	F3	1B Sweatlodge 1204	2007-12-01 12:00:00	Yes
Achatinella	fuscobasis	274	2008	2008-08-23	2004-09-22	2004	15.33	NonKeiki	5.33	3.92055	12.12	F3	POP2 Keiki C	2008-03-22 12:00:00	Yes
Achatinella	fuscobasis	0	2008	2008-09-02	2004-10-04	2004	15.32	NonKeiki	5.32	3.91507	9.32	F3	1B Sweatlodge 1204	2008-04-03 12:00:00	Yes
Achatinella	fuscobasis	0	2008	2008-09-14	2004-06-06	2004	15.98	NonKeiki	5.98	4.27671	9.75	F3	Sweatlodge 1204	2007-12-05 12:00:00	Yes
Achatinella	fuscobasis	0	2008	2008-12-12	2004-11-30	2004	15.54	NonKeiki	5.54	4.03562	11.8	F3	POP2 Keiki 1204	2008-05-30 12:00:00	Yes
Achatinella	fuscobasis	0	2009	2009-01-13	2004-12-12	2004	15.64	NonKeiki	5.64	4.09041	11.06	F3	POP2 Adult B 0105	2008-06-11 12:00:00	Yes
Achatinella	fuscobasis	0	2009	2009-01-23	2004-06-13	2004	16	NonKeiki	6	4.61644	11.42	F3	1B Wigwam	2007-12-12 12:00:00	Yes
Achatinella	fuscobasis	0	2009	2009-02-25	2004-04-23 09:36:00	2004	16.38	NonKeiki	6.38	4.84548	10.76	F3	POP2 Keiki	2007-10-22 21:36:00	Yes
Achatinella	fuscobasis	330	2009	2009-03-03	2004-12-05	2004	15.92	NonKeiki	5.92	4.24384	10.04	F3	POP2 Keiki C	2008-06-04 12:00:00	Yes
Achatinella	fuscobasis	0	2009	2009-05-29	2004-08-29 14:24:00	2004	16.22	NonKeiki	6.22	4.74904	10.81	F3	1B Wigwam	2008-02-28 02:24:00	Yes
Achatinella	fuscobasis	0	2009	2009-07-03	2004-10-03 14:24:00	2004	16.22	NonKeiki	6.22	4.74904	7.54	F3	ADULTS ONLY 2	2008-04-03 02:24:00	Yes
Achatinella	fuscobasis	0	2009	2009-07-04	2004-09-14 19:12:00	2004	16.31	NonKeiki	6.31	4.80329	11.66	F3	LAK1	2008-03-15 07:12:00	Yes
Achatinella	fuscobasis	0	2009	2009-07-15	2004-10-24 09:36:00	2004	16.18	NonKeiki	6.18	4.72493	7.46	F3	ADULTS ONLY 1	2008-04-23 21:36:00	Yes
Achatinella	fuscobasis	346	2009	2009-07-15	2004-03-02	2004	16.65	NonKeiki	6.65	5.3726	12.1	F3	LAK1	2007-08-31 12:00:00	Yes
Achatinella	fuscobasis	0	2009	2009-08-13	2004-09-17 09:36:00	2004	16.48	NonKeiki	6.48	4.90575	7.68	F3	LAK1	2008-03-17 21:36:00	Yes
Achatinella	fuscobasis	0	2009	2009-08-27	2004-04-30 19:12:00	2004	16.58	NonKeiki	6.58	5.32658	11.1	F3	LAK2	2007-10-30 07:12:00	Yes
Achatinella	fuscobasis	0	2009	2009-09-10	2004-04-11 04:48:00	2004	16.72	NonKeiki	6.72	5.41863	7.69	F3	HAK2	2007-10-10 16:48:00	Yes
Achatinella	fuscobasis	342	2009	2009-09-11	2004-11-25	2004	16.3	NonKeiki	6.3	4.79726	7.96	F3	ADULTS ONLY 2	2008-05-25 12:00:00	Yes
Achatinella	fuscobasis	325	2009	2009-10-24	2004-12-29 04:48:00	2004	16.34	NonKeiki	6.34	4.82137	11.08	F3	HIGH DENSITY KEIKI 1	2008-06-28 16:48:00	Yes
Achatinella	fuscobasis	0	2009	2009-10-24	2004-06-11	2004	16.65	NonKeiki	6.65	5.3726	11.59	F3	HIGH DENSITY KEIKI 1	2007-12-10 12:00:00	Yes
Achatinella	fuscobasis	0	2009	2009-11-06	2004-12-31 04:48:00	2004	16.39	NonKeiki	6.39	4.85151	11.53	F3	ADULTS ONLY 1	2008-06-30 16:48:00	Yes
Achatinella	fuscobasis	0	2009	2009-11-06	2004-12-18	2004	16.45	NonKeiki	6.45	4.88767	11.09	F3	LOW DENSITY KEIKI 2	2008-06-17 12:00:00	Yes
Achatinella	fuscobasis	0	2010	2010-01-08	2004-08-14	2004	16.7	NonKeiki	6.7	5.40548	10.94	F3	HIGH DENSITY KEIKI 1	2008-02-12 12:00:00	Yes
Achatinella	fuscobasis	0	2010	2010-01-28	2004-10-18 14:24:00	2004	16.51	NonKeiki	6.51	5.28055	9.61	F3	LOW DENSITY KEIKI 2	2008-04-18 02:24:00	Yes
Achatinella	fuscobasis	0	2010	2010-02-25	2004-10-03 09:36:00	2004	16.69	NonKeiki	6.69	5.3989	9.92	F3	HIGH DENSITY KEIKI 1	2008-04-02 21:36:00	Yes
Achatinella	fuscobasis	0	2005	2005-01-02	2005-01-02	2005	3.45	Keiki	0	0	2.5	F3	POP1A Adult	2009-01-01	No
Achatinella	fuscobasis	0	2005	2005-01-04	2005-01-04	2005	2.75	Keiki	0	0	2.1	F3	POP2 Adult B	2009-01-03	No
Achatinella	fuscobasis	0	2005	2005-01-18	2005-01-18	2005	3.05	Keiki	0	0	2.54	F3	POP1A Keiki	2009-01-17	No
Achatinella	fuscobasis	0	2005	2005-01-18	2005-01-18	2005	3.08	Keiki	0	0	2.35	F3	Sweatlodge	2009-01-17	No
Achatinella	fuscobasis	0	2005	2005-01-18	2005-01-18	2005	3.11	Keiki	0	0	2.88	F3	POP2 Adult B 0105	2009-01-17	No
Achatinella	fuscobasis	0	2005	2005-01-18	2005-01-18	2005	3.11	Keiki	0	0	2.88	F3	POP2 Adult B 0105	2009-01-17	No
Achatinella	fuscobasis	0	2005	2005-01-18	2005-01-18	2005	3.52	Keiki	0	0	2.82	F3	POP2 Adult B 0105	2009-01-17	No
Achatinella	fuscobasis	0	2005	2005-01-18	2005-01-18	2005	3.64	Keiki	0	0	2.92	F3	POP2 Adult B 0105	2009-01-17	No
Achatinella	fuscobasis	0	2005	2005-01-18	2005-01-18	2005	3.71	Keiki	0	0	2.65	F3	POP2 Adult	2009-01-17	No
Achatinella	fuscobasis	0	2005	2005-01-18	2005-01-18	2005	3.78	Keiki	0	0	3.06	F3	POP2 Adult B	2009-01-17	No
Achatinella	fuscobasis	0	2005	2005-01-24	2005-01-24	2005	2.28	Keiki	0	0	1.79	F3	Wigwam	2009-01-23	No
Achatinella	fuscobasis	46	2005	2005-01-24	2005-01-24	2005	3.56	Keiki	0	0	2.87	F3	Wigwam	2009-01-23	No
Achatinella	fuscobasis	0	2005	2005-01-31	2005-01-31	2005	3.01	Keiki	0	0	2.56	F3	1B Sweatlodge	2009-01-30	No
Achatinella	fuscobasis	0	2005	2005-01-31	2005-01-31	2005	3.25	Keiki	0	0	2.58	F3	Sweatlodge 1204	2009-01-30	No
Achatinella	fuscobasis	0	2005	2005-01-31	2005-01-31	2005	3.65	Keiki	0	0	2.89	F3	Sweatlodge	2009-01-30	No
Achatinella	fuscobasis	0	2005	2005-02-01	2005-02-01	2005	3.51	Keiki	0	0	2.25	F3	PalikeaGulch	2009-01-31	No
Achatinella	fuscobasis	197	2005	2005-02-14	2005-02-14	2005	2.85	Keiki	0	0	2.05	F3	POP1A Adult	2009-02-13	No
Achatinella	fuscobasis	0	2005	2005-02-15	2005-02-15	2005	3.01	Keiki	0	0	2.56	F3	POP2 Adult	2009-02-14	No
Achatinella	fuscobasis	0	2005	2005-02-22	2005-02-22	2005	2.8	Keiki	0	0	2.1	F3	Wigwam	2009-02-21	No
Achatinella	fuscobasis	48	2005	2005-02-22	2005-02-22	2005	3.52	Keiki	0	0	2.61	F3	Wigwam	2009-02-21	No
Achatinella	fuscobasis	0	2005	2005-02-22	2005-02-22	2005	3.62	Keiki	0	0	2.89	F3	Wigwam	2009-02-21	No
Achatinella	fuscobasis	193	2005	2005-02-22	2005-02-22	2005	3.83	Keiki	0	0	3.11	F3	Wigwam	2009-02-21	No
Achatinella	fuscobasis	203	2005	2005-02-22	2005-02-19 15:31:45	2005	4.04	Keiki	0.04	0.00644641	3.13	F3	Wigwam	2009-02-18 15:31:45	No
Achatinella	fuscobasis	0	2005	2005-03-01	2005-03-01	2005	3.41	Keiki	0	0	2.6	F3	1B Sweatlodge	2009-02-28	No
Achatinella	fuscobasis	316	2005	2005-03-02	2005-03-02	2005	3.76	Keiki	0	0	2.85	F3	POP1A Keiki	2009-03-01	No
Achatinella	fuscobasis	0	2005	2005-03-02	2005-01-25 02:49:24	2005	4.61	Keiki	0.61	0.0983078	3.52	F3	POP1A Keiki	2009-01-24 02:49:24	No
Achatinella	fuscobasis	0	2005	2005-03-09	2005-02-27 14:07:03	2005	4.16	Keiki	0.16	0.0257857	3.62	F3	POP2 Keiki	2009-02-26 14:07:03	No
Achatinella	fuscobasis	0	2005	2005-03-09	2005-02-26 09:52:56	2005	4.18	Keiki	0.18	0.0290089	3.16	F3	POP2 Keiki	2009-02-25 09:52:56	No
Achatinella	fuscobasis	0	2005	2005-03-09	2005-02-25 19:45:52	2005	4.19	Keiki	0.19	0.0306205	3.48	F3	POP2 Keiki	2009-02-24 19:45:52	No
Achatinella	fuscobasis	0	2005	2005-03-09	2005-02-15 19:45:52	2005	4.36	Keiki	0.36	0.0580177	3.92	F3	POP2 Keiki	2009-02-14 19:45:52	No
Achatinella	fuscobasis	0	2005	2005-03-09	2005-01-29 18:21:10	2005	4.65	Keiki	0.65	0.104754	4.36	F3	POP2 Keiki	2009-01-28 18:21:10	No
Achatinella	fuscobasis	0	2005	2005-03-23	2005-03-23	2005	2.41	Keiki	0	0	2.01	F3	POP2 Keiki	2009-03-22	No
Achatinella	fuscobasis	0	2005	2005-03-23	2005-03-13 14:07:03	2005	4.16	Keiki	0.16	0.0257857	3.42	F3	POP2 Keiki	2009-03-12 14:07:03	No
Achatinella	fuscobasis	0	2005	2005-03-23	2005-03-10 15:31:45	2005	4.21	Keiki	0.21	0.0338437	3.26	F3	POP2 Keiki	2009-03-09 15:31:45	No
Achatinella	fuscobasis	202	2005	2005-03-24	2005-03-24	2005	3.2	Keiki	0	0	2.42	F3	OpenSpaces	2009-03-23	No
Achatinella	fuscobasis	0	2005	2005-03-28	2005-03-28	2005	3.16	Keiki	0	0	2.45	F3	1B Sweatlodge	2009-03-27	No
Achatinella	fuscobasis	0	2005	2005-04-11	2005-04-11	2005	3.34	Keiki	0	0	2.78	F3	POP1A Adult	2009-04-10	No
Achatinella	fuscobasis	0	2005	2005-04-12	2005-04-12	2005	3.5	Keiki	0	0	3.4	F3	1A Keiki	2009-04-11	No
Achatinella	fuscobasis	0	2005	2005-04-20	2005-04-20	2005	3	Keiki	0	0	2.98	F3	Wigwam	2009-04-19	No
Achatinella	fuscobasis	0	2005	2005-04-25	2005-04-25	2005	3.31	Keiki	0	0	2.89	F3	1B Sweatlodge	2009-04-24	No
Achatinella	fuscobasis	0	2005	2005-04-25	2005-04-23 19:45:52	2005	4.02	Keiki	0.02	0.00322321	2.9	F3	POP1A Adult	2009-04-22 19:45:52	No
Achatinella	fuscobasis	49	2005	2005-04-25	2005-04-04 09:52:56	2005	4.35	Keiki	0.35	0.0564061	3.6	F3	POP2 Adult B	2009-04-03 09:52:56	No
Achatinella	fuscobasis	0	2005	2005-04-25	2005-02-04 14:07:03	2005	5.35	Keiki	1.35	0.217566	4.25	F3	POP2 Adult B	2009-02-03 14:07:03	No
Achatinella	fuscobasis	0	2005	2005-04-26	2005-04-26	2005	3.75	Keiki	0	0	3.06	F3	POP2 Adult B	2009-04-25	No
Achatinella	fuscobasis	262	2005	2005-04-28	2005-04-28	2005	3.6	Keiki	0	0	2.3	F3	POP2 Adult	2009-04-27	No
Achatinella	fuscobasis	0	2005	2005-05-10	2005-05-10	2005	2.09	Keiki	0	0	2.45	F3	1B Sweatlodge	2009-05-09	No
Achatinella	fuscobasis	0	2005	2005-05-10	2005-05-10	2005	2.89	Keiki	0	0	2.45	F3	1B Sweatlodge	2009-05-09	No
Achatinella	fuscobasis	0	2005	2005-05-18	2005-05-16 19:45:52	2005	4.02	Keiki	0.02	0.00322321	4.74	F3	POP2 Keiki	2009-05-15 19:45:52	No
Achatinella	fuscobasis	310	2005	2005-05-23	2005-05-23	2005	3.25	Keiki	0	0	3	F3	POP2 Adult B	2009-05-22	No
Achatinella	fuscobasis	0	2005	2005-05-23	2005-05-23	2005	3.53	Keiki	0	0	3.3	F3	POP2 Adult B	2009-05-22	No
Achatinella	fuscobasis	0	2005	2005-05-23	2005-05-23	2005	3.56	Keiki	0	0	2.75	F3	1A Adult	2009-05-22	No
Achatinella	fuscobasis	0	2005	2005-05-23	2005-05-23	2005	3.59	Keiki	0	0	4	F3	POP2 Adult B	2009-05-22	No
Achatinella	fuscobasis	0	2005	2005-05-23	2005-05-23	2005	3.75	Keiki	0	0	4.05	F3	POP2 Adult B	2009-05-22	No
Achatinella	fuscobasis	195	2005	2005-05-25	2005-05-25	2005	2.9	Keiki	0	0	3.45	F3	POP1A Keiki	2009-05-24	No
Achatinella	fuscobasis	0	2005	2005-05-25	2005-05-25	2005	3.55	Keiki	0	0	3.05	F3	POP2 Adult B	2009-05-24	No
Achatinella	fuscobasis	50	2005	2005-05-25	2005-05-10 07:03:31	2005	4.25	Keiki	0.25	0.0402901	3.59	F3	POP1A Adult	2009-05-09 07:03:31	No
Achatinella	fuscobasis	192	2005	2005-05-25	2005-05-10 07:03:31	2005	4.25	Keiki	0.25	0.0402901	3.15	F3	POP2 Adult B	2009-05-09 07:03:31	No
Achatinella	fuscobasis	0	2005	2005-06-01	2005-02-15 02:49:24	2005	5.8	Keiki	1.8	0.290089	4.16	F3	POP2 Keiki	2009-02-14 02:49:24	No
Achatinella	fuscobasis	0	2005	2005-06-05	2005-02-03 19:45:52	2005	6.06	Keiki	2.06	0.33199	4.9	F3		2009-02-02 19:45:52	No
Achatinella	fuscobasis	0	2005	2005-06-06	2005-06-06	2005	2.65	Keiki	0	0	2.25	F3	POP1A Keiki	2009-06-05	No
Achatinella	fuscobasis	0	2005	2005-06-06	2005-06-06	2005	2.8	Keiki	0	0	2.45	F3	1B Sweatlodge	2009-06-05	No
Achatinella	fuscobasis	0	2005	2005-06-06	2005-06-06	2005	2.96	Keiki	0	0	2.42	F3	1B Sweatlodge	2009-06-05	No
Achatinella	fuscobasis	0	2005	2005-06-06	2005-06-06	2005	3.05	Keiki	0	0	3	F3	POP1A Keiki	2009-06-05	No
Achatinella	fuscobasis	204	2005	2005-06-15	2005-06-15	2005	3	Keiki	0	0	2.66	F3	POP2 Keiki	2009-06-14	No
Achatinella	fuscobasis	201	2005	2005-06-15	2005-06-15	2005	3.1	Keiki	0	0	2.7	F3	Wigwam	2009-06-14	No
Achatinella	fuscobasis	0	2005	2005-06-15	2005-06-15	2005	3.48	Keiki	0	0	3.1	F3	Wigwam	2009-06-14	No
Achatinella	fuscobasis	190	2005	2005-06-15	2005-06-15	2005	3.75	Keiki	0	0	2.06	F3	POP2 Keiki	2009-06-14	No
Achatinella	fuscobasis	0	2005	2005-06-15	2005-06-15	2005	3.8	Keiki	0	0	2.78	F3	POP2 Keiki	2009-06-14	No
Achatinella	fuscobasis	0	2005	2005-06-15	2005-06-15	2005	3.98	Keiki	0	0	3.48	F3	Wigwam	2009-06-14	No
Achatinella	fuscobasis	196	2005	2005-06-15	2005-06-15	2005	3.98	Keiki	0	0	3.54	F3	Wigwam	2009-06-14	No
Achatinella	fuscobasis	315	2005	2005-06-15	2005-06-11 11:17:38	2005	4.06	Keiki	0.06	0.00966962	3.62	F3	POP2 Keiki	2009-06-10 11:17:38	No
Achatinella	fuscobasis	0	2005	2005-06-15	2005-06-10 07:03:31	2005	4.08	Keiki	0.08	0.0128928	3.54	F3	Wigwam	2009-06-09 07:03:31	No
Achatinella	fuscobasis	0	2005	2005-06-15	2005-06-09 02:49:24	2005	4.1	Keiki	0.1	0.016116	3.66	F3	POP2 Keiki	2009-06-08 02:49:24	No
Achatinella	fuscobasis	199	2005	2005-06-15	2005-05-18 22:35:17	2005	4.46	Keiki	0.46	0.0741338	4.48	F3	Wigwam	2009-05-17 22:35:17	No
Achatinella	fuscobasis	0	2005	2005-06-20	2005-06-20	2005	3.46	Keiki	0	0	2.85	F3	1B Sweatlodge	2009-06-19	No
Achatinella	fuscobasis	0	2005	2005-06-20	2005-06-17 01:24:42	2005	4.05	Keiki	0.05	0.00805802	3.21	F3	1B Sweatlodge	2009-06-16 01:24:42	No
Achatinella	fuscobasis	0	2005	2005-07-10	2005-07-10	2005	3.8	Keiki	0	0	3.43	F3	1B Sweatlodge	2009-07-09	No
Achatinella	fuscobasis	0	2005	2005-07-11	2005-07-11	2005	3.95	Keiki	0	0	3.3	F3	Wigwam	2009-07-10	No
Achatinella	fuscobasis	0	2005	2005-07-14	2005-07-14	2005	3.66	Keiki	0	0	3.67	F3	OpenSpaces	2009-07-13	No
Achatinella	fuscobasis	0	2005	2005-07-16	2005-07-14 19:45:52	2005	4.02	Keiki	0.02	0.00322321	3.41	F3	POP1A Adult	2009-07-13 19:45:52	No
Achatinella	fuscobasis	0	2005	2005-07-18	2005-07-18	2005	2.22	Keiki	0	0	1.42	F3	POP1A Adult	2009-07-17	No
Achatinella	fuscobasis	0	2005	2005-07-18	2005-07-18	2005	3.08	Keiki	0	0	2.8	F3	POP1A Adult	2009-07-17	No
Achatinella	fuscobasis	0	2005	2005-07-18	2005-07-18	2005	3.28	Keiki	0	0	2.9	F3	1B Sweatlodge	2009-07-17	No
Achatinella	fuscobasis	0	2005	2005-07-18	2005-07-18	2005	3.32	Keiki	0	0	3.06	F3	1B Sweatlodge	2009-07-17	No
Achatinella	fuscobasis	0	2005	2005-07-18	2005-07-18	2005	3.64	Keiki	0	0	3.36	F3	POP1A Adult	2009-07-17	No
Achatinella	fuscobasis	47	2005	2005-07-19	2005-07-19	2005	3.56	Keiki	0	0	2.68	F3	POP1A Keiki	2009-07-18	No
Achatinella	fuscobasis	0	2005	2005-07-19	2005-06-19	2005	4.51	Keiki	0.51	0.0821918	4.08	F3	POP1A Keiki	2009-06-18	No
Achatinella	fuscobasis	0	2005	2005-07-26	2005-07-26	2005	3.45	Keiki	0	0	2.4	F3	Wigwam	2009-07-25	No
Achatinella	fuscobasis	0	2005	2005-07-26	2005-06-11 07:03:31	2005	4.76	Keiki	0.76	0.122482	3.36	F3	POP2 Keiki	2009-06-10 07:03:31	No
Achatinella	fuscobasis	0	2005	2005-08-01	2005-08-01	2005	3	Keiki	0	0	2.1	F3	POP1A Adult	2009-07-31	No
Achatinella	fuscobasis	216	2005	2005-08-01	2005-08-01	2005	3.36	Keiki	0	0	2.28	F3	POP1A Keiki	2009-07-31	No
Achatinella	fuscobasis	210	2005	2005-08-01	2005-08-01	2005	3.98	Keiki	0	0	3.35	F3	OpenSpaces	2009-07-31	No
Achatinella	fuscobasis	312	2005	2005-08-01	2005-07-26 02:49:24	2005	4.1	Keiki	0.1	0.016116	3.96	F3	POP1A Adult	2009-07-25 02:49:24	No
Achatinella	fuscobasis	0	2005	2005-08-01	2005-07-06 02:49:24	2005	4.44	Keiki	0.44	0.0709106	3.2	F3	POP2 Adult B	2009-07-05 02:49:24	No
Achatinella	fuscobasis	255	2005	2005-08-01	2005-03-12 19:45:52	2005	6.4	Keiki	2.4	0.386785	5.36	F3	POP1A Adult	2009-03-11 19:45:52	No
Achatinella	fuscobasis	0	2005	2005-08-02	2005-08-02	2005	3.2	Keiki	0	0	3.2	F3	POP2 Adult B	2009-08-01	No
Achatinella	fuscobasis	0	2005	2005-08-02	2005-08-02	2005	3.36	Keiki	0	0	2.72	F3	POP2 Adult B	2009-08-01	No
Achatinella	fuscobasis	0	2005	2005-08-02	2005-07-20 01:24:42	2005	4.22	Keiki	0.22	0.0354553	3.12	F3	POP2 Adult B	2009-07-19 01:24:42	No
Achatinella	fuscobasis	0	2005	2005-08-08	2005-08-08	2005	3.85	Keiki	0	0	3.2	F3	Wigwam	2009-08-07	No
Achatinella	fuscobasis	52	2005	2005-08-09	2005-08-06 01:24:42	2005	4.05	Keiki	0.05	0.00805802	3.45	F3	POP2 Keiki	2009-08-05 01:24:42	No
Achatinella	fuscobasis	0	2005	2005-08-09	2005-06-22 08:28:14	2005	4.81	Keiki	0.81	0.13054	3.45	F3	POP2 Keiki 1204	2009-06-21 08:28:14	No
Achatinella	fuscobasis	0	2005	2005-08-15	2005-08-15	2005	3.4	Keiki	0	0	3.02	F3	POP1A Adult	2009-08-14	No
Achatinella	fuscobasis	212	2005	2005-08-23	2005-08-23	2005	3.95	Keiki	0	0	2.9	F3	POP2 Keiki	2009-08-22	No
Achatinella	fuscobasis	0	2005	2005-08-29	2005-08-29	2005	2.9	Keiki	0	0	2.15	F3	POP1A Keiki	2009-08-28	No
Achatinella	fuscobasis	0	2005	2005-08-29	2005-08-29	2005	3.7	Keiki	0	0	2.98	F3	1B Sweatlodge	2009-08-28	No
Achatinella	fuscobasis	230	2005	2005-08-29	2005-08-28 09:52:56	2005	4.01	Keiki	0.01	0.0016116	3.1	F3	POP2 Adult B	2009-08-27 09:52:56	No
Achatinella	fuscobasis	207	2005	2005-08-29	2005-02-27 15:31:45	2005	7.1	Keiki	3.1	0.499597	5.65	F3	POP2 Adult B	2009-02-26 15:31:45	No
Achatinella	fuscobasis	0	2005	2005-09-07	2005-09-07	2005	2.95	Keiki	0	0	2.4	F3	Wigwam	2009-09-06	No
Achatinella	fuscobasis	0	2005	2005-09-07	2005-09-07	2005	3.35	Keiki	0	0	2.59	F3	Wigwam	2009-09-06	No
Achatinella	fuscobasis	0	2005	2005-09-09	2005-09-09	2005	3.25	Keiki	0	0	2.2	F3	OpenSpaces	2009-09-08	No
Achatinella	fuscobasis	0	2005	2005-09-12	2005-09-12	2005	3.35	Keiki	0	0	2.75	F3	1B Sweatlodge	2009-09-11	No
Achatinella	fuscobasis	244	2005	2005-09-12	2005-03-06 14:07:03	2005	7.22	Keiki	3.22	0.518936	5.6	F3	POP2 Adult B	2009-03-05 14:07:03	No
Achatinella	fuscobasis	0	2005	2005-09-13	2005-09-13	2005	2.5	Keiki	0	0	2	F3	POP2 Adult B	2009-09-12	No
Achatinella	fuscobasis	0	2005	2005-09-19	2005-09-19	2005	2.8	Keiki	0	0	2.15	F3	Wigwam	2009-09-18	No
Achatinella	fuscobasis	0	2005	2005-09-19	2005-09-19	2005	3.79	Keiki	0	0	2.9	F3	Wigwam	2009-09-18	No
Achatinella	fuscobasis	0	2005	2005-09-27	2005-09-27	2005	3.28	Keiki	0	0	2.4	F3	1B Sweatlodge	2009-09-26	No
Achatinella	fuscobasis	0	2005	2005-09-27	2005-09-27	2005	3.45	Keiki	0	0	3.2	F3	1B Sweatlodge	2009-09-26	No
Achatinella	fuscobasis	0	2005	2005-09-27	2005-09-27	2005	3.71	Keiki	0	0	2.6	F3	1B Sweatlodge	2009-09-26	No
Achatinella	fuscobasis	0	2005	2005-09-28	2005-09-28	2005	3.1	Keiki	0	0	2.2	F3	POP2 Adult B	2009-09-27	No
Achatinella	fuscobasis	264	2005	2005-09-28	2005-09-28	2005	4	Keiki	0	0	2.99	F3	POP1A Keiki	2009-09-27	No
Achatinella	fuscobasis	229	2005	2005-10-02	2005-10-02	2005	3.98	Keiki	0	0	2.95	F3	OpenSpaces	2009-10-01	No
Achatinella	fuscobasis	0	2005	2005-10-05	2005-10-05	2005	3.5	Keiki	0	0	2.74	F3	Wigwam	2009-10-04	No
Achatinella	fuscobasis	0	2005	2005-10-05	2005-08-30 16:56:28	2005	4.6	Keiki	0.6	0.0966962	3.24	F3	Wigwam	2009-08-29 16:56:28	No
Achatinella	fuscobasis	0	2005	2005-10-06	2005-10-06	2005	2.65	Keiki	0	0	2.85	F3	POP2 Keiki	2009-10-05	No
Achatinella	fuscobasis	0	2005	2005-10-06	2005-10-06	2005	3.8	Keiki	0	0	2.95	F3	POP2 Keiki	2009-10-05	No
Achatinella	fuscobasis	0	2005	2005-10-11	2005-10-11	2005	2.7	Keiki	0	0	2.5	F3	POP1A Keiki	2009-10-10	No
Achatinella	fuscobasis	0	2005	2005-10-11	2005-10-11	2005	3	Keiki	0	0	2.47	F3	1B Sweatlodge	2009-10-10	No
Achatinella	fuscobasis	0	2005	2005-10-11	2005-10-11	2005	3.6	Keiki	0	0	3.32	F3	1B Sweatlodge	2009-10-10	No
Achatinella	fuscobasis	0	2005	2005-10-11	2005-10-11	2005	3.6	Keiki	0	0	3.4	F3	POP1A Keiki	2009-10-10	No
Achatinella	fuscobasis	0	2005	2005-10-12	2005-10-12	2005	3.4	Keiki	0	0	2.61	F3	POP2 Adult B	2009-10-11	No
Achatinella	fuscobasis	0	2005	2005-10-24	2005-10-24	2005	2.41	Keiki	0	0	1.81	F3	POP1A Adult	2009-10-23	No
Achatinella	fuscobasis	0	2005	2005-10-24	2005-10-24	2005	2.85	Keiki	0	0	2.21	F3	POP2 Adult B	2009-10-23	No
Achatinella	fuscobasis	0	2005	2005-10-24	2005-10-24	2005	3.6	Keiki	0	0	2.55	F3	Sweatlodge	2009-10-23	No
Achatinella	fuscobasis	0	2005	2005-10-24	2005-10-22 05:38:49	2005	4.03	Keiki	0.03	0.00483481	3.01	F3	Sweatlodge	2009-10-21 05:38:49	No
Achatinella	fuscobasis	214	2005	2005-10-24	2005-05-28 04:14:07	2005	6.53	Keiki	2.53	0.407736	4.82	F3	POP1A Adult	2009-05-27 04:14:07	No
Achatinella	fuscobasis	0	2005	2005-11-03	2005-11-03	2005	3.4	Keiki	0	0	2.87	F3	Wigwam	2009-11-02	No
Achatinella	fuscobasis	0	2005	2005-11-03	2005-11-03	2005	3.57	Keiki	0	0	2.7	F3	POP2 Keiki	2009-11-02	No
Achatinella	fuscobasis	261	2005	2005-11-08	2005-11-08	2005	3.65	Keiki	0	0	2.7	F3	POP2 Adult B	2009-11-07	No
Achatinella	fuscobasis	0	2005	2005-11-08	2005-11-08	2005	3.9	Keiki	0	0	2.9	F3	POP2 Adult B	2009-11-07	No
Achatinella	fuscobasis	0	2005	2005-11-21	2005-11-21	2005	1.9	Keiki	0	0	1.2	F3	1B Sweatlodge	2009-11-20	No
Achatinella	fuscobasis	0	2005	2005-11-21	2005-01-25	2005	9.1	Keiki	5.1	0.821918	6.4	F3	Sweatlodge 1204	2009-01-24	No
Achatinella	fuscobasis	232	2005	2005-11-29	2005-11-23 02:49:24	2005	4.1	Keiki	0.1	0.016116	3.55	F3	POP2 Keiki	2009-11-22 02:49:24	No
Achatinella	fuscobasis	239	2005	2005-12-05	2005-11-29 02:49:24	2005	4.1	Keiki	0.1	0.016116	3.4	F3	POP2 Adult B	2009-11-28 02:49:24	No
Achatinella	fuscobasis	208	2005	2005-12-14	2005-03-31 22:35:17	2005	8.37	Keiki	4.37	0.704271	6.91	F3	Wigwam	2009-03-30 22:35:17	No
Achatinella	fuscobasis	0	2005	2005-12-28	2005-12-28	2005	3.44	Keiki	0	0	2.6	F3	POP2 Keiki	2009-12-27	No
Achatinella	fuscobasis	0	2005	2005-12-30	2005-12-30	2005	3.14	Keiki	0	0	2.85	F3	Wigwam	2009-12-29	No
Achatinella	fuscobasis	0	2006	2006-01-12	2005-12-14 04:14:07	2005	4.49	Keiki	0.49	0.0789686	4.02	F3	POP2 Keiki	2009-12-13 04:14:07	No
Achatinella	fuscobasis	227	2006	2006-01-12	2005-11-10 15:31:45	2005	5.06	Keiki	1.06	0.17083	4.2	F3	POP2 Keiki	2009-11-09 15:31:45	No
Achatinella	fuscobasis	313	2006	2006-01-27	2005-12-19 18:21:10	2005	4.65	Keiki	0.65	0.104754	4	F3	Wigwam	2009-12-18 18:21:10	No
Achatinella	fuscobasis	250	2006	2006-03-10	2005-11-01 04:14:07	2005	6.19	Keiki	2.19	0.352941	5.95	F3	POP2 Keiki	2009-10-31 04:14:07	No
Achatinella	fuscobasis	0	2006	2006-04-12	2005-05-07	2005	9.78	Keiki	5.78	0.931507	6.79	F3	Sweatlodge 1204	2009-05-06	No
Achatinella	fuscobasis	0	2006	2006-11-02	2005-08-04	2005	10.45	NonKeiki	0.45	1.24658	8.6	F3	Wigwam	2009-08-03	No
Achatinella	fuscobasis	233	2006	2006-12-04	2005-08-16	2005	10.55	NonKeiki	0.55	1.30137	8.6	F3	POP1A Adult	2009-08-15	No
Achatinella	fuscobasis	0	2006	2006-12-15	2005-01-09	2005	11.7	NonKeiki	1.7	1.93151	8.65	F3	Wigwam	2009-01-08	No
Achatinella	fuscobasis	0	2007	2007-02-01	2005-07-10	2005	11.03	NonKeiki	1.03	1.56438	10.19	F3	POP2 Adult B	2009-07-09	No
Achatinella	fuscobasis	0	2007	2007-02-12	2005-02-27	2005	11.75	NonKeiki	1.75	1.9589	9.45	F3	1B Sweatlodge	2009-02-26	No
Achatinella	fuscobasis	0	2007	2007-05-05	2005-05-20	2005	11.75	NonKeiki	1.75	1.9589	8.29	F3	POP2 Keiki C	2009-05-19	No
Achatinella	fuscobasis	0	2007	2007-08-08	2005-12-29	2005	11.11	NonKeiki	1.11	1.60822	9.22	F3	OpenSpaces	2009-12-28	No
Achatinella	fuscobasis	0	2007	2007-11-23	2005-04-30	2005	12.86	NonKeiki	2.86	2.56712	10.26	F3	POP1A Keiki	2009-04-29	No
Achatinella	fuscobasis	0	2008	2008-06-02	2005-01-16	2005	14.34	NonKeiki	4.34	3.37808	9.7	F3	POP2 Keiki C	2008-07-16 12:00:00	No
Achatinella	fuscobasis	288	2008	2008-06-26	2005-01-30	2005	14.39	NonKeiki	4.39	3.40548	10.79	F3	OpenSpaces	2008-07-30 12:00:00	No
Achatinella	fuscobasis	0	2008	2008-07-24	2005-11-16	2005	13.08	NonKeiki	3.08	2.68767	10	F3	1B Wigwam	2009-11-15	No
Achatinella	fuscobasis	0	2008	2008-08-13	2005-02-19	2005	14.53	NonKeiki	4.53	3.48219	11.02	F3	Sweatlodge 1204	2008-08-19 12:00:00	No
Achatinella	fuscobasis	276	2008	2008-08-26	2005-07-28	2005	13.8	NonKeiki	3.8	3.08219	11.18	F3	POP1A Adult	2009-07-27	No
Achatinella	fuscobasis	0	2008	2008-11-10	2005-06-12	2005	14.41	NonKeiki	4.41	3.41644	10.56	F3	POP2 Adult B	2008-12-10 12:00:00	No
Achatinella	fuscobasis	0	2008	2008-11-14	2005-07-18	2005	14.25	NonKeiki	4.25	3.32877	10.87	F3	POP2 Keiki C	2009-01-15 12:00:00	No
Achatinella	fuscobasis	0	2008	2008-12-01	2005-11-18	2005	13.72	NonKeiki	3.72	3.03836	9.42	F3	1B Wigwam	2009-11-17	No
Achatinella	fuscobasis	273	2008	2008-12-22	2005-12-17	2005	13.68	NonKeiki	3.68	3.01644	8.84	F3	1B Sweatlodge 1204	2009-12-16	No
Achatinella	fuscobasis	0	2008	2008-12-30	2005-12-09	2005	13.76	NonKeiki	3.76	3.06027	9.86	F3	1B Wigwam	2009-12-08	No
Achatinella	fuscobasis	269	2008	2008-12-30	2005-08-31	2005	14.26	NonKeiki	4.26	3.33425	10.4	F3	1B Wigwam	2009-02-28 12:00:00	No
Achatinella	fuscobasis	0	2009	2009-01-04	2005-10-11	2005	14.08	NonKeiki	4.08	3.23562	9.54	F3	POP1A Adult	2009-10-10	No
Achatinella	fuscobasis	0	2009	2009-01-15	2005-07-22	2005	14.54	NonKeiki	4.54	3.48767	9.42	F3	1B Sweatlodge	2009-01-19 12:00:00	No
Achatinella	fuscobasis	0	2009	2009-02-26	2005-08-29	2005	14.56	NonKeiki	4.56	3.49863	9.82	F3	OpenSpaces	2009-02-26 12:00:00	No
Achatinella	fuscobasis	0	2009	2009-03-03	2005-12-16	2005	14.04	NonKeiki	4.04	3.2137	10.72	F3	POP2 Keiki C	2009-12-15	No
Achatinella	fuscobasis	0	2009	2009-03-20	2005-09-30	2005	14.51	NonKeiki	4.51	3.47123	10.37	F3	POP2 Keiki	2009-03-30 12:00:00	No
Achatinella	fuscobasis	0	2009	2009-03-24	2005-12-07	2005	14.19	NonKeiki	4.19	3.29589	10.21	F3	POP2 Adult B	2009-06-06 12:00:00	No
Achatinella	fuscobasis	0	2009	2009-05-21	2005-11-23	2005	14.55	NonKeiki	4.55	3.49315	9.61	F3	1B Wigwam	2009-05-23 12:00:00	No
Achatinella	fuscobasis	299	2008	2008-10-16	2005-03-29	2005	14.66	NonKeiki	4.66	3.55342	9.68	F3	POP2 Keiki C	2008-09-26 12:00:00	Yes
Achatinella	fuscobasis	304	2008	2008-10-16	2005-02-21	2005	14.84	NonKeiki	4.84	3.65205	10.42	F3	1B Wigwam	2008-08-21 12:00:00	Yes
Achatinella	fuscobasis	306	2008	2008-11-03	2005-03-23	2005	14.78	NonKeiki	4.78	3.61918	10.02	F3	POP1A Adult	2008-09-20 12:00:00	Yes
Achatinella	fuscobasis	0	2008	2008-12-03	2005-03-01	2005	15.04	NonKeiki	5.04	3.76164	11.16	F3	POP1A Adult	2008-08-29 12:00:00	Yes
Achatinella	fuscobasis	271	2008	2008-12-15	2005-06-09	2005	14.6	NonKeiki	4.6	3.52055	9	F3	1B Wigwam	2008-12-07 12:00:00	Yes
Achatinella	fuscobasis	0	2009	2009-01-09	2005-04-11	2005	15.02	NonKeiki	5.02	3.75068	9.82	F3	1B Wigwam	2008-10-09 12:00:00	Yes
Achatinella	fuscobasis	0	2009	2009-01-15	2005-04-29	2005	14.96	NonKeiki	4.96	3.71781	9.68	F3	1B Sweatlodge	2008-10-27 12:00:00	Yes
Achatinella	fuscobasis	0	2009	2009-01-15	2005-04-09	2005	15.06	NonKeiki	5.06	3.7726	11.34	F3	POP2 Keiki B	2008-10-07 12:00:00	Yes
Achatinella	fuscobasis	0	2009	2009-01-19	2005-07-14	2005	14.6	NonKeiki	4.6	3.52055	10.58	F3	POP2 Adult B	2009-01-11 12:00:00	Yes
Achatinella	fuscobasis	329	2009	2009-02-02	2005-06-30	2005	14.74	NonKeiki	4.74	3.59726	10.62	F3	POP2 Adult B	2008-12-28 12:00:00	Yes
Achatinella	fuscobasis	0	2009	2009-02-11	2005-06-15	2005	14.86	NonKeiki	4.86	3.66301	9.32	F3	1B Wigwam	2008-12-13 12:00:00	Yes
Achatinella	fuscobasis	0	2009	2009-02-17	2005-07-19	2005	14.72	NonKeiki	4.72	3.5863	9.52	F3	POP2 Keiki B	2009-01-16 12:00:00	Yes
Achatinella	fuscobasis	0	2009	2009-02-17	2005-05-20	2005	15.02	NonKeiki	5.02	3.75068	10.38	F3	POP2 Keiki B	2008-11-17 12:00:00	Yes
Achatinella	fuscobasis	333	2009	2009-02-24	2005-05-13	2005	15.09	NonKeiki	5.09	3.78904	11.39	F3	POP2 Keiki 1204	2008-11-10 12:00:00	Yes
Achatinella	fuscobasis	0	2009	2009-04-14	2005-09-29	2005	14.64	NonKeiki	4.64	3.54247	10.02	F3	POP2 Keiki	2009-03-29 12:00:00	Yes
Achatinella	fuscobasis	0	2009	2009-04-30	2005-02-11	2005	15.87	NonKeiki	5.87	4.21644	10.26	F3	POP2 Adult B	2008-08-11 12:00:00	Yes
Achatinella	fuscobasis	0	2009	2009-05-08	2005-02-27	2005	15.83	NonKeiki	5.83	4.19452	11.33	F3	1B Sweatlodge	2008-08-27 12:00:00	Yes
Achatinella	fuscobasis	0	2009	2009-05-21	2005-08-13	2005	15.06	NonKeiki	5.06	3.7726	10.12	F3	POP2 Keiki C	2009-02-10 12:00:00	Yes
Achatinella	fuscobasis	0	2009	2009-06-02	2005-09-04	2005	15.01	NonKeiki	5.01	3.74521	7.5	F3	LAK1	2009-03-04 12:00:00	Yes
Achatinella	fuscobasis	0	2009	2009-07-04	2005-12-03	2005	14.72	NonKeiki	4.72	3.5863	9.64	F3	LAK1	2009-06-02 12:00:00	Yes
Achatinella	fuscobasis	0	2009	2009-08-02	2005-09-19	2005	15.24	NonKeiki	5.24	3.87123	7.12	F3	ADULTS ONLY 1	2009-03-19 12:00:00	Yes
Achatinella	fuscobasis	0	2009	2009-08-02	2005-07-13	2005	15.58	NonKeiki	5.58	4.05753	7.22	F3	HAK1	2009-01-10 12:00:00	Yes
Achatinella	fuscobasis	328	2009	2009-08-02	2005-04-22	2005	15.99	NonKeiki	5.99	4.28219	7.6	F3	ADULTS ONLY 2	2008-10-20 12:00:00	Yes
Achatinella	fuscobasis	327	2009	2009-09-11	2005-11-24	2005	15.11	NonKeiki	5.11	3.8	9.95	F3	LAK2	2009-05-24 12:00:00	Yes
Achatinella	fuscobasis	0	2009	2009-09-22	2005-09-30	2005	15.44	NonKeiki	5.44	3.98082	11.75	F3	HAK1	2009-03-30 12:00:00	Yes
Achatinella	fuscobasis	0	2009	2009-09-22	2005-09-22	2005	15.48	NonKeiki	5.48	4.00274	8.85	F3	HAK1	2009-03-22 12:00:00	Yes
Achatinella	fuscobasis	0	2009	2009-09-22	2005-06-24	2005	15.93	NonKeiki	5.93	4.24932	12.75	F3	HAK1	2008-12-22 12:00:00	Yes
Achatinella	fuscobasis	324	2009	2009-10-24	2005-10-16	2005	15.52	NonKeiki	5.52	4.02466	10.02	F3	LOW DENSITY KEIKI 1	2009-04-15 12:00:00	Yes
Achatinella	fuscobasis	0	2009	2009-11-06	2005-10-21	2005	15.56	NonKeiki	5.56	4.04658	10.73	F3	HIGH DENSITY KEIKI 1	2009-04-20 12:00:00	Yes
Achatinella	fuscobasis	0	2009	2009-11-06	2005-10-15	2005	15.59	NonKeiki	5.59	4.06301	11.18	F3	LOW DENSITY KEIKI 1	2009-04-14 12:00:00	Yes
Achatinella	fuscobasis	0	2009	2009-11-06	2005-10-05	2005	15.64	NonKeiki	5.64	4.09041	10.61	F3	HIGH DENSITY KEIKI 1	2009-04-04 12:00:00	Yes
Achatinella	fuscobasis	0	2009	2009-11-06	2005-10-01	2005	15.66	NonKeiki	5.66	4.10137	11.25	F3	LOW DENSITY KEIKI 2	2009-03-31 12:00:00	Yes
Achatinella	fuscobasis	0	2009	2009-11-06	2005-08-24	2005	15.85	NonKeiki	5.85	4.20548	11.27	F3	HIGH DENSITY KEIKI 1	2009-02-21 12:00:00	Yes
Achatinella	fuscobasis	0	2009	2009-11-06	2005-08-12	2005	15.91	NonKeiki	5.91	4.23836	10.77	F3	LOW DENSITY KEIKI 2	2009-02-09 12:00:00	Yes
Achatinella	fuscobasis	0	2009	2009-11-06	2005-08-04	2005	15.95	NonKeiki	5.95	4.26027	12.22	F3	ADULTS ONLY 1	2009-02-01 12:00:00	Yes
Achatinella	fuscobasis	0	2009	2009-11-06	2005-03-16	2005	16.05	NonKeiki	6.05	4.64658	10.96	F3	LOW DENSITY KEIKI 2	2008-09-13 12:00:00	Yes
Achatinella	fuscobasis	0	2009	2009-11-06	2005-02-17 14:24:00	2005	16.17	NonKeiki	6.17	4.7189	10.95	F3	ADULTS ONLY 2	2008-08-18 02:24:00	Yes
Achatinella	fuscobasis	0	2009	2009-11-06	2005-02-13 04:48:00	2005	16.19	NonKeiki	6.19	4.73096	10.66	F3	HIGH DENSITY KEIKI 1	2008-08-13 16:48:00	Yes
Achatinella	fuscobasis	0	2009	2009-11-06	2005-01-26 14:24:00	2005	16.27	NonKeiki	6.27	4.77918	11.89	F3	LOW DENSITY KEIKI 1	2008-07-27 02:24:00	Yes
Achatinella	fuscobasis	0	2009	2009-11-20	2005-10-07	2005	15.7	NonKeiki	5.7	4.12329	10.82	F3	High Density Keiki 2	2009-04-06 12:00:00	Yes
Achatinella	fuscobasis	0	2009	2009-11-20	2005-01-27 09:36:00	2005	16.33	NonKeiki	6.33	4.81534	11.24	F3	HIGH DENSITY KEIKI 1	2008-07-27 21:36:00	Yes
Achatinella	fuscobasis	0	2009	2009-12-04	2005-11-28	2005	15.51	NonKeiki	5.51	4.01918	10.58	F3	HIGH DENSITY KEIKI 1	2009-05-28 12:00:00	Yes
Achatinella	fuscobasis	0	2009	2009-12-04	2005-09-27	2005	15.82	NonKeiki	5.82	4.18904	10.61	F3	LOW DENSITY KEIKI 1	2009-03-27 12:00:00	Yes
Achatinella	fuscobasis	0	2009	2009-12-04	2005-03-24 04:48:00	2005	16.14	NonKeiki	6.14	4.70082	11.12	F3	ADULTS ONLY 2	2008-09-21 16:48:00	Yes
Achatinella	fuscobasis	0	2009	2009-12-04	2005-02-06	2005	16.35	NonKeiki	6.35	4.8274	10.66	F3	ADULTS ONLY 2	2008-08-06 12:00:00	Yes
Achatinella	fuscobasis	0	2009	2009-12-18	2005-12-14	2005	15.5	NonKeiki	5.5	4.0137	9.76	F3	LOW DENSITY KEIKI 2	2009-06-13 12:00:00	Yes
Achatinella	fuscobasis	0	2009	2009-12-18	2005-11-20	2005	15.62	NonKeiki	5.62	4.07945	10.14	F3	LOW DENSITY KEIKI 2	2009-05-20 12:00:00	Yes
Achatinella	fuscobasis	0	2009	2009-12-18	2005-04-27	2005	16.05	NonKeiki	6.05	4.64658	10.88	F3	ADULTS ONLY 2	2008-10-25 12:00:00	Yes
Achatinella	fuscobasis	0	2010	2010-01-08	2005-12-19	2005	15.58	NonKeiki	5.58	4.05753	9.94	F3	High Density Keiki 2	2009-06-18 12:00:00	Yes
Achatinella	fuscobasis	0	2010	2010-01-08	2005-12-17	2005	15.59	NonKeiki	5.59	4.06301	10.66	F3	LOW DENSITY KEIKI 2	2009-06-16 12:00:00	Yes
Achatinella	fuscobasis	0	2010	2010-01-08	2005-11-07	2005	15.79	NonKeiki	5.79	4.1726	4.74	F3	HIGH DENSITY KEIKI 1	2009-05-07 12:00:00	Yes
Achatinella	fuscobasis	0	2010	2010-01-08	2005-10-30	2005	15.83	NonKeiki	5.83	4.19452	10.28	F3	NO JUVENILLES 2	2009-04-29 12:00:00	Yes
Achatinella	fuscobasis	0	2010	2010-01-08	2005-10-26	2005	15.85	NonKeiki	5.85	4.20548	10	F3	High Density Keiki 2	2009-04-25 12:00:00	Yes
Achatinella	fuscobasis	0	2010	2010-01-08	2005-05-22 09:36:00	2005	16.03	NonKeiki	6.03	4.63452	10.06	F3	LOW DENSITY KEIKI 2	2008-11-19 21:36:00	Yes
Achatinella	fuscobasis	0	2010	2010-01-08	2005-05-18	2005	16.05	NonKeiki	6.05	4.64658	9.81	F3	HIGH DENSITY KEIKI 1	2008-11-15 12:00:00	Yes
Achatinella	fuscobasis	0	2010	2010-01-08	2005-05-15 19:12:00	2005	16.06	NonKeiki	6.06	4.6526	10.13	F3	Adults Only 1	2008-11-13 07:12:00	Yes
Achatinella	fuscobasis	0	2010	2010-01-08	2005-05-13 14:24:00	2005	16.07	NonKeiki	6.07	4.65863	11.28	F3	LOW DENSITY KEIKI 2	2008-11-11 02:24:00	Yes
Achatinella	fuscobasis	0	2010	2010-01-08	2005-05-11 09:36:00	2005	16.08	NonKeiki	6.08	4.66466	10.11	F3	LOW DENSITY KEIKI 1	2008-11-08 21:36:00	Yes
Achatinella	fuscobasis	0	2010	2010-01-08	2005-05-09 04:48:00	2005	16.09	NonKeiki	6.09	4.67068	10.11	F3	ADULTS ONLY 1	2008-11-06 16:48:00	Yes
Achatinella	fuscobasis	0	2010	2010-01-08	2005-04-21 14:24:00	2005	16.17	NonKeiki	6.17	4.7189	10.49	F3	ADULTS ONLY 1	2008-10-20 02:24:00	Yes
Achatinella	fuscobasis	0	2010	2010-01-08	2005-03-08 14:24:00	2005	16.37	NonKeiki	6.37	4.83945	10.97	F3	NO JUVENILLES 2	2008-09-06 02:24:00	Yes
Achatinella	fuscobasis	0	2010	2010-01-28	2005-11-05	2005	15.9	NonKeiki	5.9	4.23288	9.33	F3	High Density Keiki 2	2009-05-05 12:00:00	Yes
Achatinella	fuscobasis	0	2010	2010-01-28	2005-06-18	2005	16	NonKeiki	6	4.61644	9.75	F3	High Density Keiki 2	2008-12-16 12:00:00	Yes
Achatinella	fuscobasis	0	2010	2010-01-28	2005-06-13 14:24:00	2005	16.02	NonKeiki	6.02	4.62849	10.16	F3	High Density Keiki 2	2008-12-12 02:24:00	Yes
Achatinella	fuscobasis	0	2010	2010-01-28	2005-05-07 04:48:00	2005	16.19	NonKeiki	6.19	4.73096	9.58	F3	LOW DENSITY KEIKI 2	2008-11-04 16:48:00	Yes
Achatinella	fuscobasis	0	2010	2010-02-09	2005-06-25 14:24:00	2005	16.02	NonKeiki	6.02	4.62849	9.22	F3	ADULTS ONLY 1	2008-12-24 02:24:00	Yes
Achatinella	fuscobasis	0	2010	2010-02-10	2005-11-12	2005	15.93	NonKeiki	5.93	4.24932	10.48	F3	ADULTS ONLY 2	2009-05-12 12:00:00	Yes
Achatinella	fuscobasis	0	2010	2010-02-24	2005-06-16 09:36:00	2005	16.13	NonKeiki	6.13	4.69479	10.79	F3	ADULTS ONLY 2	2008-12-14 21:36:00	Yes
Achatinella	fuscobasis	350	2010	2010-02-25	2005-12-01	2005	15.91	NonKeiki	5.91	4.23836	9.82	F3	High Density Keiki 2	2009-05-31 12:00:00	Yes
Achatinella	fuscobasis	0	2010	2010-02-26	2005-12-22	2005	15.81	NonKeiki	5.81	4.18356	9.95	F3	High Density Keiki 2	2009-06-21 12:00:00	Yes
Achatinella	fuscobasis	343	2010	2010-03-11	2005-11-29	2005	15.99	NonKeiki	5.99	4.28219	10.51	F3	ADULTS ONLY 2	2009-05-29 12:00:00	Yes
Achatinella	fuscobasis	0	2010	2010-03-12	2005-05-04	2005	16.4	NonKeiki	6.4	4.85753	10.51	F3	High Density Keiki 2	2008-11-01 12:00:00	Yes
Achatinella	fuscobasis	341	2010	2010-04-20	2005-07-06 04:48:00	2005	16.29	NonKeiki	6.29	4.79123	8.26	F3	ADULTS ONLY 1	2009-01-03 16:48:00	Yes
Achatinella	fuscobasis	0	2010	2010-04-20	2005-06-05 09:36:00	2005	16.43	NonKeiki	6.43	4.87562	10.2	F3	High Density Keiki 2	2008-12-03 21:36:00	Yes
Achatinella	fuscobasis	0	2010	2010-05-19	2005-08-17 09:36:00	2005	16.23	NonKeiki	6.23	4.75507	10.42	F3	Low Density Keiki 1	2009-02-14 21:36:00	Yes
Achatinella	fuscobasis	0	2011	2011-04-01	2005-11-24 04:48:00	2005	16.62	NonKeiki	6.62	5.35288	11.15	F3	POP1	2009-05-24 16:48:00	Yes
Achatinella	fuscobasis	0	2011	2011-06-06	2005-11-23	2005	16.9	NonKeiki	6.9	5.53699	10.35	F3	POP5	2009-05-23 12:00:00	Yes
Achatinella	fuscobasis	0	2011	2011-06-15	2005-12-16 09:36:00	2005	16.84	NonKeiki	6.84	5.49753	10.87	F3	POP4	2009-06-15 21:36:00	Yes	Y
Achatinella	fuscobasis	0	2012	2012-05-30	2005-12-18	2005	17.96	NonKeiki	7.96	6.45205	11.13	F3	POP4	2009-06-17 12:00:00	Yes
Achatinella	fuscobasis	0	2006	2006-01-02	2006-01-02	2006	3.34	Keiki	0	0	2.52	F3	OpenSpaces	2010-01-01	No
Achatinella	fuscobasis	0	2006	2006-01-02	2006-01-02	2006	3.35	Keiki	0	0	2.74	F3	OpenSpaces	2010-01-01	No
Achatinella	fuscobasis	0	2006	2006-01-05	2006-01-05	2006	3.85	Keiki	0	0	2.8	F3	POP1A Keiki	2010-01-04	No
Achatinella	fuscobasis	0	2006	2006-01-06	2006-01-06	2006	3.8	Keiki	0	0	2.75	F3	POP2 Adult B	2010-01-05	No
Achatinella	fuscobasis	0	2006	2006-01-12	2006-01-12	2006	3.55	Keiki	0	0	3.2	F3	POP2 Keiki	2010-01-11	No
Achatinella	fuscobasis	0	2006	2006-01-12	2006-01-03 04:14:07	2006	4.15	Keiki	0.15	0.0241741	3.1	F3	Wigwam	2010-01-02 04:14:07	No
Achatinella	fuscobasis	314	2006	2006-01-27	2006-01-27	2006	3.5	Keiki	0	0	2.9	F3	Wigwam	2010-01-26	No
Achatinella	fuscobasis	0	2006	2006-01-27	2006-01-27	2006	3.58	Keiki	0	0	3	F3	Wigwam	2010-01-26	No
Achatinella	fuscobasis	0	2006	2006-01-27	2006-01-27	2006	3.7	Keiki	0	0	2.65	F3	Wigwam	2010-01-26	No
Achatinella	fuscobasis	0	2006	2006-01-27	2006-01-27	2006	3.75	Keiki	0	0	2.65	F3	POP2 Keiki	2010-01-26	No
Achatinella	fuscobasis	0	2006	2006-01-27	2006-01-27	2006	3.8	Keiki	0	0	3.05	F3	Wigwam	2010-01-26	No
Achatinella	fuscobasis	0	2006	2006-01-27	2006-01-27	2006	3.88	Keiki	0	0	2.8	F3	Wigwam	2010-01-26	No
Achatinella	fuscobasis	51	2006	2006-01-27	2006-01-12 07:03:31	2006	4.25	Keiki	0.25	0.0402901	3.05	F3	Wigwam	2010-01-11 07:03:31	No
Achatinella	fuscobasis	225	2006	2006-01-27	2006-01-03 11:17:38	2006	4.4	Keiki	0.4	0.0644641	3.75	F3	POP2 Keiki	2010-01-02 11:17:38	No
Achatinella	fuscobasis	0	2006	2006-02-09	2006-02-09	2006	1.9	Keiki	0	0	1.3	F3	Wigwam	2010-02-08	No
Achatinella	fuscobasis	0	2006	2006-02-09	2006-02-09	2006	3	Keiki	0	0	2.4	F3	Wigwam	2010-02-08	No
Achatinella	fuscobasis	0	2006	2006-02-09	2006-02-09	2006	3.17	Keiki	0	0	2.5	F3	Wigwam	2010-02-08	No
Achatinella	fuscobasis	0	2006	2006-02-21	2006-02-21	2006	2.1	Keiki	0	0	1.2	F3	POP2 Keiki	2010-02-20	No
Achatinella	fuscobasis	0	2006	2006-03-02	2006-03-02	2006	2.5	Keiki	0	0	1.95	F3	POP2 Adult B	2010-03-01	No
Achatinella	fuscobasis	0	2006	2006-03-09	2006-03-09	2006	3.19	Keiki	0	0	2.75	F3	Wigwam	2010-03-08	No
Achatinella	fuscobasis	0	2006	2006-03-09	2006-03-09	2006	3.8	Keiki	0	0	3.21	F3	OpenSpaces	2010-03-08	No
Achatinella	fuscobasis	0	2006	2006-03-09	2006-03-09	2006	4	Keiki	0	0	3.22	F3	POP2 Keiki	2010-03-08	No
Achatinella	fuscobasis	53	2006	2006-03-16	2006-01-27 08:28:14	2006	4.81	Keiki	0.81	0.13054	3.78	F3	POP2 Adult B	2010-01-26 08:28:14	No
Achatinella	fuscobasis	0	2006	2006-04-06	2006-04-06	2006	3.94	Keiki	0	0	2.93	F3	Wigwam	2010-04-05	No
Achatinella	fuscobasis	0	2006	2006-04-13	2006-04-13	2006	3.35	Keiki	0	0	2.5	F3	POP2 Adult B	2010-04-12	No
Achatinella	fuscobasis	0	2006	2006-04-24	2006-04-24	2006	4	Keiki	0	0	3.5	F3	POP1A Adult	2010-04-23	No
Achatinella	fuscobasis	0	2006	2006-05-01	2006-05-01	2006	3.85	Keiki	0	0	3.15	F3	POP2 Adult B	2010-04-30	No
Achatinella	fuscobasis	0	2006	2006-05-03	2006-05-03	2006	3.85	Keiki	0	0	2.85	F3	POP2 Keiki	2010-05-02	No
Achatinella	fuscobasis	219	2006	2006-05-03	2006-03-05 04:14:07	2006	5	Keiki	1	0.16116	3.88	F3	POP2 Keiki	2010-03-04 04:14:07	No
Achatinella	fuscobasis	0	2006	2006-05-04	2006-05-04	2006	3.41	Keiki	0	0	2.73	F3	Wigwam	2010-05-03	No
Achatinella	fuscobasis	0	2006	2006-05-05	2006-05-05	2006	3.68	Keiki	0	0	3.62	F3	POP1A Adult	2010-05-04	No
Achatinella	fuscobasis	0	2006	2006-05-25	2006-05-25	2006	3.01	Keiki	0	0	3.84	F3	POP2 Adult B	2010-05-24	No
Achatinella	fuscobasis	0	2006	2006-05-25	2006-05-25	2006	3.84	Keiki	0	0	4.15	F3	POP2 Adult B	2010-05-24	No
Achatinella	fuscobasis	260	2006	2006-05-31	2006-05-29 05:38:49	2006	4.03	Keiki	0.03	0.00483481	3.31	F3	POP2 Keiki	2010-05-28 05:38:49	No
Achatinella	fuscobasis	0	2006	2006-06-22	2006-06-22	2006	3.83	Keiki	0	0	2.82	F3	POP2 Adult B	2010-06-21	No
Achatinella	fuscobasis	221	2006	2006-06-22	2006-06-22	2006	3.84	Keiki	0	0	3.15	F3	POP2 Adult B	2010-06-21	No
Achatinella	fuscobasis	0	2006	2006-07-02	2006-07-02	2006	3.33	Keiki	0	0	2.65	F3	POP1A Adult	2010-07-01	No
Achatinella	fuscobasis	0	2006	2006-07-02	2006-06-17 21:10:35	2006	4.24	Keiki	0.24	0.0386785	3.35	F3	POP1A Adult	2010-06-16 21:10:35	No
Achatinella	fuscobasis	235	2006	2006-07-17	2006-07-17	2006	3.65	Keiki	0	0	3.75	F3	POP2 Adult B	2010-07-16	No
Achatinella	fuscobasis	0	2006	2006-07-17	2006-07-17	2006	4	Keiki	0	0	4.35	F3	POP2 Adult B	2010-07-16	No
Achatinella	fuscobasis	0	2006	2006-07-26	2006-07-26	2006	3.15	Keiki	0	0	3.15	F3	POP2 Keiki	2010-07-25	No
Achatinella	fuscobasis	0	2006	2006-08-01	2006-08-01	2006	3.25	Keiki	0	0	3.2	F3	POP1A Keiki	2010-07-31	No
Achatinella	fuscobasis	317	2006	2006-09-08	2006-09-08	2006	3.15	Keiki	0	0	3.9	F3	POP1A Adult	2010-09-07	No
Achatinella	fuscobasis	0	2006	2006-09-08	2006-09-08	2006	3.75	Keiki	0	0	4.05	F3	POP1A Adult	2010-09-07	No
Achatinella	fuscobasis	0	2006	2006-09-11	2006-09-11	2006	2.65	Keiki	0	0	2.65	F3	POP1A Keiki	2010-09-10	No
Achatinella	fuscobasis	0	2006	2006-09-11	2006-09-11	2006	3.65	Keiki	0	0	3.65	F3	POP1A Keiki	2010-09-10	No
Achatinella	fuscobasis	0	2006	2006-09-11	2006-09-11	2006	3.75	Keiki	0	0	3.75	F3	POP1A Keiki	2010-09-10	No
Achatinella	fuscobasis	0	2006	2006-09-11	2006-07-14 04:14:07	2006	5	Keiki	1	0.16116	4.7	F3	POP1A Keiki	2010-07-13 04:14:07	No
Achatinella	fuscobasis	0	2006	2006-09-13	2006-09-13	2006	3.95	Keiki	0	0	3.72	F3	POP2 Adult B	2010-09-12	No
Achatinella	fuscobasis	0	2006	2006-09-13	2006-08-28 16:56:28	2006	4.26	Keiki	0.26	0.0419017	3.69	F3	POP2 Adult B	2010-08-27 16:56:28	No
Achatinella	fuscobasis	0	2006	2006-10-10	2006-10-10	2006	3.37	Keiki	0	0	3.3	F3	POP1A Keiki	2010-10-09	No
Achatinella	fuscobasis	0	2006	2006-10-23	2006-09-03	2006	4.85	Keiki	0.85	0.136986	4.15	F3	POP1A Adult	2010-09-02	No
Achatinella	fuscobasis	211	2006	2006-10-23	2006-01-10 16:56:28	2006	8.85	Keiki	4.85	0.781628	7.9	F3	POP1A Adult	2010-01-09 16:56:28	No
Achatinella	fuscobasis	0	2006	2006-11-08	2006-11-08	2006	3.5	Keiki	0	0	2.84	F3	POP1A Keiki	2010-11-07	No
Achatinella	fuscobasis	0	2006	2006-11-15	2006-11-15	2006	3.64	Keiki	0	0	3.5	F3	POP2 Keiki	2010-11-14	No
Achatinella	fuscobasis	0	2006	2006-11-15	2006-11-15	2006	3.85	Keiki	0	0	3.58	F3	POP2 Keiki	2010-11-14	No
Achatinella	fuscobasis	0	2006	2006-11-15	2006-10-01 07:03:31	2006	4.76	Keiki	0.76	0.122482	4.65	F3	POP2 Keiki	2010-09-30 07:03:31	No
Achatinella	fuscobasis	0	2006	2006-11-17	2006-11-17	2006	1.81	Keiki	0	0	1.46	F3	Wigwam	2010-11-16	No
Achatinella	fuscobasis	0	2006	2006-11-17	2006-11-17	2006	3.35	Keiki	0	0	2.74	F3	Wigwam	2010-11-16	No
Achatinella	fuscobasis	0	2006	2006-12-04	2006-12-04	2006	2.95	Keiki	0	0	3.2	F3	POP1A Adult	2010-12-03	No
Achatinella	fuscobasis	209	2006	2006-12-04	2006-12-04	2006	3.85	Keiki	0	0	4.05	F3	POP1A Adult	2010-12-03	No
Achatinella	fuscobasis	0	2006	2006-12-04	2006-11-19 07:03:31	2006	4.25	Keiki	0.25	0.0402901	4.4	F3	POP1A Adult	2010-11-18 07:03:31	No
Achatinella	fuscobasis	0	2006	2006-12-04	2006-11-04 14:07:03	2006	4.5	Keiki	0.5	0.0805802	4.35	F3	POP1A Adult	2010-11-03 14:07:03	No
Achatinella	fuscobasis	0	2006	2006-12-19	2006-11-19 14:07:03	2006	4.5	Keiki	0.5	0.0805802	3.73	F3	1B Sweatlodge	2010-11-18 14:07:03	No
Achatinella	fuscobasis	0	2006	2006-12-28	2006-12-28	2006	2.4	Keiki	0	0	2.5	F3	1B Wigwam	2010-12-27	No
Achatinella	fuscobasis	0	2007	2007-03-12	2006-05-06 14:07:03	2006	9.26	Keiki	5.26	0.847703	7.02	F3	POP2 Adult B 0105	2010-05-05 14:07:03	No
Achatinella	fuscobasis	277	2007	2007-05-02	2006-08-26 18:21:10	2006	8.22	Keiki	4.22	0.680097	9	F3	POP1A Adult	2010-08-25 18:21:10	No
Achatinella	fuscobasis	0	2009	2009-02-16	2006-11-22	2006	12.26	NonKeiki	2.26	2.23836	11.54	F3	POP2 Adult B	2010-11-21	No
Achatinella	fuscobasis	0	2009	2009-05-11	2006-02-05	2006	14.13	NonKeiki	4.13	3.26301	10.15	F3	POP1A Keiki	2010-02-04	No
Achatinella	fuscobasis	0	2009	2009-05-21	2006-05-08	2006	13.72	NonKeiki	3.72	3.03836	9.08	F3	1B Wigwam	2010-05-07	No
Achatinella	fuscobasis	0	2009	2009-06-02	2006-01-16	2006	14.34	NonKeiki	4.34	3.37808	10.76	F3	POP2 Keiki C	2009-07-16 12:00:00	No
Achatinella	fuscobasis	332	2009	2009-09-11	2006-12-29	2006	13.11	NonKeiki	3.11	2.70411	7.7	F3	LAK2	2010-12-28	No
Achatinella	fuscobasis	0	2009	2009-09-22	2006-03-31	2006	14.53	NonKeiki	4.53	3.48219	7.14	F3	HAK1	2009-09-28 12:00:00	No
Achatinella	fuscobasis	323	2009	2009-10-24	2006-12-20	2006	13.37	NonKeiki	3.37	2.84658	8.62	F3	High Density Keiki 2	2010-12-19	No
Achatinella	fuscobasis	0	2009	2009-11-06	2006-06-20	2006	14.35	NonKeiki	4.35	3.38356	9.4	F3	ADULTS ONLY 1	2009-12-18 12:00:00	No
Achatinella	fuscobasis	0	2009	2009-11-06	2006-05-23	2006	14.49	NonKeiki	4.49	3.46027	10.28	F3	LOW DENSITY KEIKI 2	2009-11-20 12:00:00	No
Achatinella	fuscobasis	0	2009	2009-12-04	2006-08-23	2006	14.17	NonKeiki	4.17	3.28493	10.11	F3	LOW DENSITY KEIKI 2	2010-08-22	No
Achatinella	fuscobasis	0	2009	2009-12-18	2006-10-04	2006	14.03	NonKeiki	4.03	3.20822	9.68	F3	ADULTS ONLY 2	2010-10-03	No
Achatinella	fuscobasis	0	2010	2010-01-08	2006-09-05	2006	14.28	NonKeiki	4.28	3.34521	10.71	F3	NO JUVENILLES 2	2010-03-05 12:00:00	No
Achatinella	fuscobasis	0	2010	2010-01-20	2006-08-24	2006	14.4	NonKeiki	4.4	3.41096	7.84	F3	ADULTS ONLY 2	2010-02-21 12:00:00	No
Achatinella	fuscobasis		2010	2010-01-29	2006-12-21	2006	13.85	NonKeiki	3.85	3.10959	8.7	F3	ADULTS ONLY 1	2010-12-20	No
Achatinella	fuscobasis	0	2010	2010-01-29	2006-08-07	2006	14.53	NonKeiki	4.53	3.48219	9.9	F3	HIGH DENSITY KEIKI 1	2010-02-04 12:00:00	No
Achatinella	fuscobasis	352	2010	2010-03-11	2006-11-02	2006	14.3	NonKeiki	4.3	3.35616	9.25	F3	Low Density Keiki 2	2010-05-02 12:00:00	No
Achatinella	fuscobasis	340	2010	2010-04-20	2006-11-02	2006	14.5	NonKeiki	4.5	3.46575	9.6	F3	ADULTS ONLY 1	2010-05-02 12:00:00	No
Achatinella	fuscobasis	0	2009	2009-09-23	2006-02-14	2006	14.76	NonKeiki	4.76	3.60822	9.98	F3	LAK1	2009-08-14 12:00:00	Yes
Achatinella	fuscobasis	351	2009	2009-10-24	2006-04-04	2006	14.67	NonKeiki	4.67	3.5589	11.39	F3	ADULTS ONLY 1	2009-10-02 12:00:00	Yes
Achatinella	fuscobasis	335	2009	2009-10-24	2006-03-21	2006	14.74	NonKeiki	4.74	3.59726	10.96	F3	LOW DENSITY KEIKI 2	2009-09-18 12:00:00	Yes
Achatinella	fuscobasis	348	2009	2009-10-24	2006-01-18	2006	15.05	NonKeiki	5.05	3.76712	10.04	F3	LOW DENSITY KEIKI 2	2009-07-18 12:00:00	Yes
Achatinella	fuscobasis	0	2009	2009-11-06	2006-04-07	2006	14.72	NonKeiki	4.72	3.5863	10.68	F3	High Density Keiki 2	2009-10-05 12:00:00	Yes
Achatinella	fuscobasis	0	2009	2009-11-06	2006-02-10	2006	15	NonKeiki	5	3.73973	10.13	F3	ADULTS ONLY 1	2009-08-10 12:00:00	Yes
Achatinella	fuscobasis	0	2009	2009-11-06	2006-01-19	2006	15.11	NonKeiki	5.11	3.8	10.32	F3	ADULTS ONLY 1	2009-07-19 12:00:00	Yes
Achatinella	fuscobasis	0	2009	2009-11-18	2006-01-05	2006	15.24	NonKeiki	5.24	3.87123	10.57	F3	ADULTS ONLY 1	2009-07-05 12:00:00	Yes
Achatinella	fuscobasis	0	2009	2009-11-18	2006-01-03	2006	15.25	NonKeiki	5.25	3.87671	10.81	F3	ADULTS ONLY 2	2009-07-03 12:00:00	Yes
Achatinella	fuscobasis	0	2009	2009-11-20	2006-02-18	2006	15.03	NonKeiki	5.03	3.75616	10.27	F3	LOW DENSITY KEIKI 2	2009-08-18 12:00:00	Yes
Achatinella	fuscobasis	0	2009	2009-11-20	2006-02-06	2006	15.09	NonKeiki	5.09	3.78904	10.87	F3	HIGH DENSITY KEIKI 1	2009-08-06 12:00:00	Yes
Achatinella	fuscobasis	0	2009	2009-11-20	2006-01-23	2006	15.16	NonKeiki	5.16	3.8274	10.68	F3	HIGH DENSITY KEIKI 1	2009-07-23 12:00:00	Yes
Achatinella	fuscobasis	0	2009	2009-12-04	2006-06-04	2006	14.57	NonKeiki	4.57	3.50411	10.17	F3	ADULTS ONLY 2	2009-12-02 12:00:00	Yes
Achatinella	fuscobasis	0	2010	2010-01-08	2006-06-11	2006	14.71	NonKeiki	4.71	3.58082	10.47	F3	LOW DENSITY KEIKI 2	2009-12-09 12:00:00	Yes
Achatinella	fuscobasis	0	2010	2010-01-08	2006-04-12	2006	15.01	NonKeiki	5.01	3.74521	11.62	F3	LOW DENSITY KEIKI 1	2009-10-10 12:00:00	Yes
Achatinella	fuscobasis	0	2010	2010-01-08	2006-03-29	2006	15.08	NonKeiki	5.08	3.78356	10.09	F3	LOW DENSITY KEIKI 1	2009-09-26 12:00:00	Yes
Achatinella	fuscobasis	0	2010	2010-01-08	2006-02-27	2006	15.23	NonKeiki	5.23	3.86575	9.59	F3	LOW DENSITY KEIKI 1	2009-08-27 12:00:00	Yes
Achatinella	fuscobasis	0	2010	2010-01-08	2006-02-07	2006	15.33	NonKeiki	5.33	3.92055	9.1	F3	High Density Keiki 2	2009-08-07 12:00:00	Yes
Achatinella	fuscobasis	0	2010	2010-01-08	2006-01-20	2006	15.42	NonKeiki	5.42	3.96986	10.35	F3	NO JUVENILLES 2	2009-07-20 12:00:00	Yes
Achatinella	fuscobasis	0	2010	2010-01-08	2006-01-04	2006	15.5	NonKeiki	5.5	4.0137	10.58	F3	LOW DENSITY KEIKI 2	2009-07-04 12:00:00	Yes
Achatinella	fuscobasis	0	2010	2010-01-28	2006-07-13	2006	14.65	NonKeiki	4.65	3.54795	9.5	F3	ADULTS ONLY 2	2010-01-10 12:00:00	Yes
Achatinella	fuscobasis	0	2010	2010-01-28	2006-06-23	2006	14.75	NonKeiki	4.75	3.60274	9.73	F3	High Density Keiki 2	2009-12-21 12:00:00	Yes
Achatinella	fuscobasis	0	2010	2010-01-28	2006-04-18	2006	15.08	NonKeiki	5.08	3.78356	9.8	F3	LOW DENSITY KEIKI 2	2009-10-16 12:00:00	Yes
Achatinella	fuscobasis	0	2010	2010-01-28	2006-04-02	2006	15.16	NonKeiki	5.16	3.8274	8.9	F3	High Density Keiki 2	2009-09-30 12:00:00	Yes
Achatinella	fuscobasis	0	2010	2010-01-29	2006-06-08	2006	14.83	NonKeiki	4.83	3.64658	8.91	F3	LOW DENSITY KEIKI 1	2009-12-06 12:00:00	Yes
Achatinella	fuscobasis	0	2010	2010-01-29	2006-04-01	2006	15.17	NonKeiki	5.17	3.83288	9.51	F3	ADULTS ONLY 1	2009-09-29 12:00:00	Yes
Achatinella	fuscobasis	0	2010	2010-01-29	2006-03-26	2006	15.2	NonKeiki	5.2	3.84932	9.22	F3	LOW DENSITY KEIKI 1	2009-09-23 12:00:00	Yes
Achatinella	fuscobasis	0	2010	2010-01-29	2006-01-15	2006	15.55	NonKeiki	5.55	4.0411	9.18	F3	ADULTS ONLY 1	2009-07-15 12:00:00	Yes
Achatinella	fuscobasis	336	2010	2010-02-10	2006-02-28	2006	15.39	NonKeiki	5.39	3.95342	10.29	F3	LOW DENSITY KEIKI 2	2009-08-28 12:00:00	Yes
Achatinella	fuscobasis	347	2010	2010-02-24	2006-04-09	2006	15.26	NonKeiki	5.26	3.88219	9.36	F3	ADULTS ONLY 1	2009-10-07 12:00:00	Yes
Achatinella	fuscobasis	0	2010	2010-02-25	2006-08-16	2006	14.62	NonKeiki	4.62	3.53151	9.14	F3	LOW DENSITY KEIKI 1	2010-02-13 12:00:00	Yes
Achatinella	fuscobasis	0	2010	2010-02-25	2006-06-09	2006	14.96	NonKeiki	4.96	3.71781	9.62	F3	High Density Keiki 2	2009-12-07 12:00:00	Yes
Achatinella	fuscobasis	0	2010	2010-02-25	2006-04-06	2006	15.28	NonKeiki	5.28	3.89315	8.86	F3	LOW DENSITY KEIKI 1	2009-10-04 12:00:00	Yes
Achatinella	fuscobasis	0	2010	2010-03-11	2006-02-09	2006	15.63	NonKeiki	5.63	4.08493	9.03	F3	Adults Only 2	2009-08-09 12:00:00	Yes
Achatinella	fuscobasis	331	2010	2010-03-12	2006-08-23	2006	14.66	NonKeiki	4.66	3.55342	9.34	F3	LOW DENSITY KEIKI 1	2010-02-20 12:00:00	Yes
Achatinella	fuscobasis	326	2010	2010-03-12	2006-08-19	2006	14.68	NonKeiki	4.68	3.56438	9.24	F3	LOW DENSITY KEIKI 1	2010-02-16 12:00:00	Yes
Achatinella	fuscobasis	0	2010	2010-04-02	2006-08-14	2006	14.81	NonKeiki	4.81	3.63562	9.08	F3	ADULTS ONLY 1	2010-02-11 12:00:00	Yes
Achatinella	fuscobasis	0	2010	2010-04-02	2006-03-09	2006	15.6	NonKeiki	5.6	4.06849	8.88	F3	High Density Keiki 2	2009-09-06 12:00:00	Yes
Achatinella	fuscobasis	0	2010	2010-04-02	2006-02-19	2006	15.69	NonKeiki	5.69	4.11781	9.99	F3	Adults Only 2	2009-08-19 12:00:00	Yes
Achatinella	fuscobasis	0	2010	2010-04-05	2006-09-14	2006	14.67	NonKeiki	4.67	3.5589	9.23	F3	High Density Keiki 2	2010-03-14 12:00:00	Yes
Achatinella	fuscobasis	0	2010	2010-04-05	2006-06-08	2006	15.16	NonKeiki	5.16	3.8274	9.28	F3	High Density Keiki 2	2009-12-06 12:00:00	Yes
Achatinella	fuscobasis	0	2010	2010-04-20	2006-08-08	2006	14.93	NonKeiki	4.93	3.70137	8.61	F3	Low Density Keiki 1	2010-02-05 12:00:00	Yes
Achatinella	fuscobasis	0	2010	2010-04-20	2006-04-06	2006	15.55	NonKeiki	5.55	4.0411	9.95	F3	High Density Keiki 2	2009-10-04 12:00:00	Yes
Achatinella	fuscobasis	0	2010	2010-05-06	2006-05-14	2006	15.44	NonKeiki	5.44	3.98082	8.9	F3	High Density Keiki 2	2009-11-11 12:00:00	Yes
Achatinella	fuscobasis	0	2010	2010-05-06	2006-02-19	2006	15.86	NonKeiki	5.86	4.21096	9.07	F3	High Density Keiki 2	2009-08-19 12:00:00	Yes
Achatinella	fuscobasis	0	2010	2010-05-07	2006-11-05	2006	14.57	NonKeiki	4.57	3.50411	9.04	F3	Adults Only 1	2010-05-05 12:00:00	Yes
Achatinella	fuscobasis	0	2010	2010-05-07	2006-02-08	2006	15.92	NonKeiki	5.92	4.24384	9.61	F3	Low Density Keiki 1	2009-08-08 12:00:00	Yes
Achatinella	fuscobasis	0	2010	2010-05-18	2006-04-28	2006	15.58	NonKeiki	5.58	4.05753	9.47	F3	Adults Only 2	2009-10-26 12:00:00	Yes
Achatinella	fuscobasis	0	2010	2010-05-19	2006-10-30	2006	14.66	NonKeiki	4.66	3.55342	10.6	F3	Low Density Keiki 1	2010-04-29 12:00:00	Yes
Achatinella	fuscobasis	0	2010	2010-05-19	2006-04-21	2006	15.62	NonKeiki	5.62	4.07945	10.86	F3	Adults Only 1	2009-10-19 12:00:00	Yes
Achatinella	fuscobasis	0	2010	2010-05-19	2006-02-24	2006	15.9	NonKeiki	5.9	4.23288	10.62	F3	Adults Only 1	2009-08-24 12:00:00	Yes
Achatinella	fuscobasis	337	2010	2010-06-08	2006-10-02	2006	14.9	NonKeiki	4.9	3.68493	10.04	F3	LOW RATIO JUVENILLE 1	2010-04-01 12:00:00	Yes
Achatinella	fuscobasis	0	2010	2010-06-28	2006-06-04	2006	15.6	NonKeiki	5.6	4.06849	9.67	F3	High Ratio Juvenille 2	2009-12-02 12:00:00	Yes
Achatinella	fuscobasis	0	2010	2010-06-28	2006-05-25	2006	15.65	NonKeiki	5.65	4.09589	10.19	F3	High Ratio Juvenille 1	2009-11-22 12:00:00	Yes
Achatinella	fuscobasis	0	2010	2010-07-26	2006-04-19	2006	15.97	NonKeiki	5.97	4.27123	10.23	F3	NO JUVENILLES 1	2009-10-17 12:00:00	Yes
Achatinella	fuscobasis	0	2010	2010-12-03	2006-11-13	2006	15.58	NonKeiki	5.58	4.05753	10.2	F3	High Ratio Juvenille 1	2010-05-13 12:00:00	Yes
Achatinella	fuscobasis	0	2011	2011-08-10	2006-10-02	2006	16.4	NonKeiki	6.4	4.85753	11.12	F3	POP5	2010-04-01 12:00:00	Yes
Achatinella	fuscobasis	0	2011	2011-11-01	2006-06-23 19:12:00	2006	16.63	NonKeiki	6.63	5.35945	10.84	F3	POP2	2009-12-22 07:12:00	Yes
Achatinella	fuscobasis	0	2011	2011-12-29	2006-01-21 12:00:00	2006	17.21	NonKeiki	7.21	5.93836	12.03	F3	POP3	2009-07-22	Yes
Achatinella	fuscobasis	0	2012	2012-03-22	2006-12-11 14:24:00	2006	16.51	NonKeiki	6.51	5.28055	11.39	F3	POP1	2010-06-11 02:24:00	Yes
Achatinella	fuscobasis	0	2012	2012-03-23	2006-11-25 19:12:00	2006	16.58	NonKeiki	6.58	5.32658	11.06	F3	POP4	2010-05-26 07:12:00	Yes
Achatinella	fuscobasis	0	2012	2012-05-02	2006-12-02 04:48:00	2006	16.72	NonKeiki	6.72	5.41863	9.77	F3	POP1	2010-06-01 16:48:00	Yes	Y
Achatinella	fuscobasis	0	2012	2012-05-30	2006-05-22	2006	17.34	NonKeiki	7.34	6.0274	10.15	F3	POP4	2009-11-19 12:00:00	Yes
Achatinella	fuscobasis	0	2012	2012-06-14	2006-12-09 04:48:00	2006	16.87	NonKeiki	6.87	5.51726	11.89	F3	POP5	2010-06-08 16:48:00	Yes
Achatinella	fuscobasis	0	2012	2012-10-19	2006-01-31 04:48:00	2006	18.03	NonKeiki	8.03	6.72	10	F3	POP4	2009-07-31 16:48:00	Yes
Achatinella	fuscobasis	0	2012	2012-11-14	2006-02-21	2006	18.05	NonKeiki	8.05	6.73425	10.6	F3	POP2	2009-08-21 12:00:00	Yes
Achatinella	fuscobasis	0	2007	2007-01-10	2007-01-10	2007	3.84	Keiki	0	0	3.32	F3	NONE	2011-01-09	No
Achatinella	fuscobasis	0	2007	2007-01-17	2007-01-17	2007	3.2	Keiki	0	0	2.69	F3	POP1A Keiki	2011-01-16	No
Achatinella	fuscobasis	0	2007	2007-01-17	2007-01-17	2007	3.54	Keiki	0	0	2.7	F3	POP1A Keiki	2011-01-16	No
Achatinella	fuscobasis	0	2007	2007-01-17	2007-01-17	2007	3.71	Keiki	0	0	3.28	F3	POP1A Keiki	2011-01-16	No
Achatinella	fuscobasis	0	2007	2007-01-17	2007-01-17	2007	3.93	Keiki	0	0	3.37	F3	1B Sweatlodge	2011-01-16	No
Achatinella	fuscobasis	0	2007	2007-01-17	2007-01-17	2007	4	Keiki	0	0	2.87	F3	POP1A Keiki	2011-01-16	No
Achatinella	fuscobasis	0	2007	2007-01-29	2007-01-29	2007	3.3	Keiki	0	0	3.5	F3	POP1A Adult	2011-01-28	No
Achatinella	fuscobasis	0	2007	2007-02-01	2007-02-01	2007	3.38	Keiki	0	0	2.89	F3	POP2 Adult B	2011-01-31	No
Achatinella	fuscobasis	0	2007	2007-02-08	2007-02-08	2007	2.4	Keiki	0	0	2.7	F3	1B Wigwam	2011-02-07	No
Achatinella	fuscobasis	0	2007	2007-02-14	2007-02-14	2007	2.8	Keiki	0	0	2.25	F3	POP2 Keiki B	2011-02-13	No
Achatinella	fuscobasis	0	2007	2007-02-23	2007-02-23	2007	3.85	Keiki	0	0	3.46	F3	1B Wigwam	2011-02-22	No
Achatinella	fuscobasis	0	2007	2007-03-02	2007-03-02	2007	2.6	Keiki	0	0	2.8	F3	POP2 Adult B	2011-03-01	No
Achatinella	fuscobasis	0	2007	2007-03-02	2007-03-02	2007	3.5	Keiki	0	0	3.75	F3	POP2 Adult B	2011-03-01	No
Achatinella	fuscobasis	0	2007	2007-03-02	2007-02-27 01:24:42	2007	4.05	Keiki	0.05	0.00805802	4.65	F3	POP2 Adult B	2011-02-26 01:24:42	No
Achatinella	fuscobasis	0	2007	2007-03-08	2007-03-08	2007	3.1	Keiki	0	0	3.35	F3	1B Wigwam	2011-03-07	No
Achatinella	fuscobasis	0	2007	2007-04-08	2007-04-08	2007	2.5	Keiki	0	0	2.55	F3	1B Wigwam	2011-04-07	No
Achatinella	fuscobasis	0	2007	2007-05-05	2007-05-05	2007	3.29	Keiki	0	0	3	F3	1B Wigwam	2011-05-04	No
Achatinella	fuscobasis	0	2007	2007-05-05	2007-05-05	2007	3.3	Keiki	0	0	2.65	F3	1B Wigwam	2011-05-04	No
Achatinella	fuscobasis	0	2007	2007-05-17	2007-05-17	2007	3.55	Keiki	0	0	3.6	F3	1B Wigwam	2011-05-16	No
Achatinella	fuscobasis	0	2007	2007-05-17	2007-05-17	2007	3.85	Keiki	0	0	3.83	F3	POP2 Keiki	2011-05-16	No
Achatinella	fuscobasis	0	2007	2007-06-04	2007-06-04	2007	2.43	Keiki	0	0	2.2	F3	POP1A Keiki	2011-06-03	No
Achatinella	fuscobasis	0	2007	2007-07-05	2007-07-05	2007	3.2	Keiki	0	0	3.65	F3	POP2 Adult B	2011-07-04	No
Achatinella	fuscobasis	0	2007	2007-07-05	2007-07-05	2007	4	Keiki	0	0	3.78	F3	POP1A Adult	2011-07-04	No
Achatinella	fuscobasis	0	2007	2007-07-06	2007-07-06	2007	3.5	Keiki	0	0	3.65	F3	POP2 Adult B	2011-07-05	No
Achatinella	fuscobasis	0	2007	2007-07-19	2007-07-19	2007	2.5	Keiki	0	0	2.7	F3	1B Sweatlodge	2011-07-18	No
Achatinella	fuscobasis	0	2007	2007-07-28	2007-07-28	2007	2.8	Keiki	0	0	2.4	F3	1B Sweatlodge	2011-07-27	No
Achatinella	fuscobasis	0	2007	2007-08-16	2007-07-02 07:03:31	2007	4.76	Keiki	0.76	0.122482	4.49	F3	POP2 Adult B	2011-07-01 07:03:31	No
Achatinella	fuscobasis	0	2007	2007-09-20	2007-09-20	2007	2.7	Keiki	0	0	2.28	F3	OpenSpaces	2011-09-19	No
Achatinella	fuscobasis	0	2007	2007-09-24	2007-09-24	2007	3.57	Keiki	0	0	2.87	F3	POP2 Adult B 0105	2011-09-23	No
Achatinella	fuscobasis	0	2007	2007-09-27	2007-09-27	2007	3.29	Keiki	0	0	3.16	F3	POP2 Adult B	2011-09-26	No
Achatinella	fuscobasis	0	2007	2007-09-27	2007-09-27	2007	3.56	Keiki	0	0	3.09	F3	POP2 Adult B	2011-09-26	No
Achatinella	fuscobasis	0	2007	2007-09-27	2007-09-03 11:17:38	2007	4.4	Keiki	0.4	0.0644641	3.25	F3	POP2 Adult B	2011-09-02 11:17:38	No
Achatinella	fuscobasis	0	2007	2007-10-12	2007-07-18 16:56:28	2007	5.45	Keiki	1.45	0.233683	4.59	F3	POP2 Adult B	2011-07-17 16:56:28	No
Achatinella	fuscobasis	0	2007	2007-11-16	2007-11-16	2007	3	Keiki	0	0	2.61	F3	1B Wigwam	2011-11-15	No
Achatinella	fuscobasis	0	2007	2007-11-23	2007-11-23	2007	3.89	Keiki	0	0	2.75	F3	1B Sweatlodge	2011-11-22	No
Achatinella	fuscobasis	0	2007	2007-12-11	2007-12-11	2007	3.42	Keiki	0	0	2.8	F3	POP1A Adult	2011-12-10	No
Achatinella	fuscobasis	0	2007	2007-12-19	2007-12-01 08:28:14	2007	4.3	Keiki	0.3	0.0483481	3.77	F3	POP2 Adult B	2011-11-30 08:28:14	No
Achatinella	fuscobasis	0	2008	2008-02-19	2007-12-25 16:56:28	2007	4.94	Keiki	0.94	0.151491	4.65	F3	POP2 Adult B	2011-12-24 16:56:28	No
Achatinella	fuscobasis	0	2008	2008-12-01	2007-03-01	2007	11.38	NonKeiki	1.38	1.75616	9.78	F3	1B Wigwam	2011-02-28	No
Achatinella	fuscobasis	0	2009	2009-08-28	2007-06-03	2007	12.26	NonKeiki	2.26	2.23836	8.3	F3	HAK1	2011-06-02	No
Achatinella	fuscobasis	344	2009	2009-10-24	2007-03-20	2007	12.92	NonKeiki	2.92	2.6	10.78	F3	ADULTS ONLY 1	2011-03-19	No
Achatinella	fuscobasis	0	2009	2009-12-04	2007-10-31	2007	12	NonKeiki	2	2.09589	9.42	F3	HIGH DENSITY KEIKI 1	2011-10-30	No
Achatinella	fuscobasis	0	2009	2009-12-06	2007-10-07	2007	12.13	NonKeiki	2.13	2.16712	9.14	F3	LOW DENSITY KEIKI 2	2011-10-06	No
Achatinella	fuscobasis	0	2010	2010-01-08	2007-11-13	2007	12.11	NonKeiki	2.11	2.15616	9.75	F3	NO JUVENILLES 2	2011-11-12	No
Achatinella	fuscobasis	0	2010	2010-01-28	2007-02-12	2007	13.58	NonKeiki	3.58	2.96164	9.01	F3	LOW DENSITY KEIKI 2	2011-02-11	No
Achatinella	fuscobasis	334	2010	2010-02-10	2007-05-10	2007	13.21	NonKeiki	3.21	2.7589	9.88	F3	ADULTS ONLY 2	2011-05-09	No
Achatinella	fuscobasis	0	2010	2010-02-23	2007-08-05	2007	12.84	NonKeiki	2.84	2.55616	2.16	F3	EXS1	2011-08-04	No
Achatinella	fuscobasis	322	2010	2010-02-25	2007-12-11	2007	12.21	NonKeiki	2.21	2.21096	8.45	F3	HIGH DENSITY KEIKI 1	2011-12-10	No
Achatinella	fuscobasis	0	2010	2010-03-11	2007-03-06	2007	13.68	NonKeiki	3.68	3.01644	9.27	F3	Low Density Keiki 2	2011-03-05	No	Y
Achatinella	fuscobasis	0	2010	2010-04-20	2007-08-13	2007	13.08	NonKeiki	3.08	2.68767	8.88	F3	High Density Keiki 2	2011-08-12	No
Achatinella	fuscobasis	0	2010	2010-04-20	2007-03-18	2007	13.82	NonKeiki	3.82	3.09315	7.47	F3	Low Density Keiki 1	2011-03-17	No
Achatinella	fuscobasis	0	2010	2010-05-07	2007-03-19	2007	13.9	NonKeiki	3.9	3.13699	9.46	F3	Adults Only 1	2011-03-18	No
Achatinella	fuscobasis	321	2010	2010-06-04	2007-07-03	2007	13.51	NonKeiki	3.51	2.92329	9.65	F3	HIGH RATIO JUVENILLE 2	2011-07-02	No
Achatinella	fuscobasis	0	2010	2010-06-15	2007-02-02	2007	14.32	NonKeiki	4.32	3.36712	9.5	F3	Low Ratio Juvenille 1	2010-08-02 12:00:00	No
Achatinella	fuscobasis	345	2010	2010-07-26	2007-05-08	2007	14.05	NonKeiki	4.05	3.21918	9.3	F3	NO JUVENILLES 1	2011-05-07	No
Achatinella	fuscobasis	318	2010	2010-08-10	2007-07-12	2007	13.8	NonKeiki	3.8	3.08219	9.31	F3	HIGH RATIO JUVENILLE 1	2011-07-11	No
Achatinella	fuscobasis	0	2010	2010-08-10	2007-03-18	2007	14.38	NonKeiki	4.38	3.4	9.16	F3	Low Ratio Juvenille 1	2010-09-15 12:00:00	No
Achatinella	fuscobasis	0	2010	2010-08-11	2007-07-27	2007	13.73	NonKeiki	3.73	3.04384	9.38	F3	High Ratio Juvenille 2	2011-07-26	No
Achatinella	fuscobasis	0	2010	2010-11-09	2007-08-22	2007	14.05	NonKeiki	4.05	3.21918	9.83	F3	Low Ratio Juvenille 1	2011-08-21	No
Achatinella	fuscobasis	0	2010	2010-11-24	2007-07-08	2007	14.35	NonKeiki	4.35	3.38356	9.45	F3	Low Ratio Juvenille 2	2011-01-05 12:00:00	No
Achatinella	fuscobasis	0	2010	2010-12-02	2007-07-02	2007	14.42	NonKeiki	4.42	3.42192	10.49	F3	High Ratio Juvenille 2	2010-12-30 12:00:00	No
Achatinella	fuscobasis	0	2010	2010-10-28	2007-01-20	2007	15.06	NonKeiki	5.06	3.7726	10.39	F3	High Ratio Juvenille 1	2010-07-20 12:00:00	Yes
Achatinella	fuscobasis	0	2010	2010-11-09	2007-01-14	2007	15.15	NonKeiki	5.15	3.82192	10	F3	LOW RATIO JUVENILLE 1	2010-07-14 12:00:00	Yes
Achatinella	fuscobasis	0	2011	2011-02-18	2007-07-04	2007	14.8	NonKeiki	4.8	3.63014	9.81	F3	POP1	2011-01-01 12:00:00	Yes
Achatinella	fuscobasis	0	2011	2011-03-22	2007-04-25	2007	15.31	NonKeiki	5.31	3.90959	10.34	F3	POP1	2010-10-23 12:00:00	Yes
Achatinella	fuscobasis	0	2011	2011-05-19	2007-04-19	2007	15.63	NonKeiki	5.63	4.08493	11.09	F3	POP5	2010-10-17 12:00:00	Yes
Achatinella	fuscobasis	0	2011	2011-12-02	2007-02-21 14:24:00	2007	16.27	NonKeiki	6.27	4.77918	12.48	F3	POP3	2010-08-22 02:24:00	Yes
Achatinella	fuscobasis	0	2012	2012-01-23	2007-10-19	2007	15.96	NonKeiki	5.96	4.26575	12.17	F3	POP2	2011-04-18 12:00:00	Yes
Achatinella	fuscobasis	0	2012	2012-03-09	2007-06-15	2007	16.2	NonKeiki	6.2	4.73699	11.21	F3	POP3	2010-12-13 12:00:00	Yes
Achatinella	fuscobasis	0	2012	2012-03-22	2007-12-29	2007	15.9	NonKeiki	5.9	4.23288	10.26	F3	POP1	2011-06-28 12:00:00	Yes
Achatinella	fuscobasis	0	2012	2012-03-23	2007-07-18 19:12:00	2007	16.11	NonKeiki	6.11	4.68274	12.17	F3	POP4	2011-01-16 07:12:00	Yes
Achatinella	fuscobasis	0	2012	2012-05-03	2007-06-30 09:36:00	2007	16.38	NonKeiki	6.38	4.84548	9.95	F3	POP2	2010-12-28 21:36:00	Yes
Achatinella	fuscobasis	0	2012	2012-05-03	2007-06-30 09:36:00	2007	16.38	NonKeiki	6.38	4.84548	10.24	F3	POP2	2010-12-28 21:36:00	Yes	Y
Achatinella	fuscobasis	0	2012	2012-05-16	2007-09-28 09:36:00	2007	16.03	NonKeiki	6.03	4.63452	11.03	F3	POP4	2011-03-28 21:36:00	Yes
Achatinella	fuscobasis	0	2012	2012-05-16	2007-09-19 14:24:00	2007	16.07	NonKeiki	6.07	4.65863	10.03	F3	POP2	2011-03-20 02:24:00	Yes
Achatinella	fuscobasis	0	2012	2012-05-16	2007-02-04 14:24:00	2007	16.51	NonKeiki	6.51	5.28055	10.07	F3	POP4	2010-08-05 02:24:00	Yes
Achatinella	fuscobasis	0	2012	2012-06-21	2007-09-05	2007	16.3	NonKeiki	6.3	4.79726	9.46	F3	POP1	2011-03-05 12:00:00	Yes
Achatinella	fuscobasis	0	2012	2012-06-29	2007-08-24 04:48:00	2007	16.39	NonKeiki	6.39	4.85151	10.12	F3	POP3	2011-02-21 16:48:00	Yes
Achatinella	fuscobasis	0	2012	2012-06-29	2007-02-22 04:48:00	2007	16.62	NonKeiki	6.62	5.35288	10.99	F3	POP4	2010-08-22 16:48:00	Yes
Achatinella	fuscobasis	0	2013	2013-05-06	2007-11-19 09:36:00	2007	16.79	NonKeiki	6.79	5.46466	11.56	F3	POP5	2011-05-19 21:36:00	Yes
Achatinella	fuscobasis	0	2013	2013-05-31	2007-02-09 12:00:00	2007	17.75	NonKeiki	7.75	6.30822	10.65	F3	POP3	2010-08-10	Yes
Achatinella	fuscobasis	0	2013	2013-10-15	2007-09-02	2007	17.48	NonKeiki	7.48	6.12329	10.09	F3	POP4	2011-03-02 12:00:00	Yes
Achatinella	fuscobasis	0	2008	2008-01-02	2008-01-02	2008	3.41	Keiki	0	0	3.15	F3	1B Wigwam	2012-01-01	No
Achatinella	fuscobasis	0	2008	2008-01-18	2008-01-18	2008	3.09	Keiki	0	0	2.95	F3	1B Sweatlodge	2012-01-17	No
Achatinella	fuscobasis	0	2008	2008-01-25	2008-01-25	2008	2	Keiki	0	0	1.67	F3	OpenSpaces	2012-01-24	No
Achatinella	fuscobasis	0	2008	2008-01-25	2008-01-25	2008	3	Keiki	0	0	2.3	F3	OpenSpaces	2012-01-24	No
Achatinella	fuscobasis	0	2008	2008-01-25	2008-01-25	2008	3.69	Keiki	0	0	3.18	F3	OpenSpaces	2012-01-24	No
Achatinella	fuscobasis	0	2008	2008-02-07	2008-02-07	2008	3.75	Keiki	0	0	2.99	F3	POP2 Keiki	2012-02-06	No
Achatinella	fuscobasis	0	2008	2008-02-19	2008-02-19	2008	3.4	Keiki	0	0	3	F3	POP2 Adult B	2012-02-18	No
Achatinella	fuscobasis	0	2008	2008-02-19	2008-02-19	2008	3.62	Keiki	0	0	3.84	F3	POP2 Adult B	2012-02-18	No
Achatinella	fuscobasis	0	2008	2008-03-01	2008-03-01	2008	3.19	Keiki	0	0	2.62	F3	1B Wigwam	2012-02-29	No
Achatinella	fuscobasis	0	2008	2008-03-07	2008-03-07	2008	3.02	Keiki	0	0	2.5	F3	OpenSpaces	2012-03-06	No
Achatinella	fuscobasis	0	2008	2008-03-12	2008-03-12	2008	3.73	Keiki	0	0	3.2	F3	POP1A Keiki	2012-03-11	No
Achatinella	fuscobasis	0	2008	2008-03-13	2008-03-03 14:07:03	2008	4.16	Keiki	0.16	0.0257857	3.6	F3	POP2 Adult B	2012-03-02 14:07:03	No
Achatinella	fuscobasis	0	2008	2008-03-24	2008-03-24	2008	1.66	Keiki	0	0	1.24	F3	1B Wigwam	2012-03-23	No
Achatinella	fuscobasis	0	2008	2008-04-09	2008-04-09	2008	3.06	Keiki	0	0	2.75	F3	1B Sweatlodge	2012-04-08	No
Achatinella	fuscobasis	0	2008	2008-07-23	2008-07-17 16:56:28	2008	4.09	Keiki	0.09	0.0145044	3.26	F3	POP2 Keiki 1204	2012-07-16 16:56:28	No
Achatinella	fuscobasis	0	2008	2008-07-30	2008-07-30	2008	2.74	Keiki	0	0	2.24	F3	1B Sweatlodge	2012-07-29	No
Achatinella	fuscobasis	0	2008	2008-08-08	2008-08-08	2008	2.46	Keiki	0	0	2.01	F3	POP2 Keiki	2012-08-07	No
Achatinella	fuscobasis	0	2008	2008-08-08	2008-08-08	2008	2.96	Keiki	0	0	2.47	F3	1B Wigwam	2012-08-07	No
Achatinella	fuscobasis	0	2008	2008-08-12	2008-08-12	2008	3.42	Keiki	0	0	2.6	F3	1B Sweatlodge	2012-08-11	No
Achatinella	fuscobasis	0	2008	2008-09-05	2008-07-29 08:28:14	2008	4.64	Keiki	0.64	0.103143	3.14	F3	POP2 Keiki C	2012-07-28 08:28:14	No
Achatinella	fuscobasis	0	2008	2008-09-19	2008-09-19	2008	2.06	Keiki	0	0	2.18	F3	1B Wigwam	2012-09-18	No
Achatinella	fuscobasis	0	2008	2008-10-09	2008-10-09	2008	2.95	Keiki	0	0	2.16	F3	POP2 Adult B	2012-10-08	No
Achatinella	fuscobasis	0	2008	2008-10-14	2008-10-14	2008	2.92	Keiki	0	0	2.48	F3	POP2 Adult B 0105	2012-10-13	No
Achatinella	fuscobasis	0	2008	2008-10-22	2008-10-22	2008	3.4	Keiki	0	0	2.73	F3	1B Sweatlodge	2012-10-21	No
Achatinella	fuscobasis	0	2008	2008-11-21	2008-11-21	2008	2.94	Keiki	0	0	2.52	F3	1B Sweatlodge	2012-11-20	No
Achatinella	fuscobasis	0	2008	2008-11-28	2008-11-28	2008	3.34	Keiki	0	0	3.24	F3	POP2 Keiki 1204	2012-11-27	No
Achatinella	fuscobasis	0	2008	2008-12-03	2008-12-03	2008	3.02	Keiki	0	0	2.58	F3	POP2 Keiki B	2012-12-02	No
Achatinella	fuscobasis	0	2008	2008-12-03	2008-12-03	2008	3.96	Keiki	0	0	3.4	F3	POP1A Keiki	2012-12-02	No
Achatinella	fuscobasis	0	2008	2008-12-22	2008-12-22	2008	3.18	Keiki	0	0	3.48	F3	POP2 Keiki B	2012-12-21	No
Achatinella	fuscobasis	0	2008	2008-12-30	2008-12-30	2008	3.34	Keiki	0	0	3.62	F3	1B Wigwam	2012-12-29	No
Achatinella	fuscobasis	0	2009	2009-01-04	2008-12-31 11:17:38	2008	4.06	Keiki	0.06	0.00966962	4.04	F3	POP2 Adult B 0105	2012-12-30 11:17:38	No
Achatinella	fuscobasis	0	2009	2009-08-02	2008-07-13	2008	10.1	NonKeiki	0.1	1.05479	6.72	F3	HAK1	2012-07-12	No
Achatinella	fuscobasis	0	2009	2009-08-14	2008-11-21 02:49:24	2008	8.52	Keiki	4.52	0.728445	2.78	F3	EXS1	2012-11-20 02:49:24	No
Achatinella	fuscobasis	0	2009	2009-09-11	2008-07-17	2008	10.28	NonKeiki	0.28	1.15342	5.92	F3	ADULTS ONLY 2	2012-07-16	No
Achatinella	fuscobasis	0	2010	2010-01-08	2008-09-12	2008	10.59	NonKeiki	0.59	1.32329	8.87	F3	LOW DENSITY KEIKI 2	2012-09-11	No
Achatinella	fuscobasis	0	2010	2010-02-23	2008-02-23	2008	11.83	NonKeiki	1.83	2.00274	9.22	F3	EXS1	2012-02-22	No
Achatinella	fuscobasis	0	2010	2010-02-25	2008-09-20	2008	10.79	NonKeiki	0.79	1.43288	7.44	F3	EXS1	2012-09-19	No
Achatinella	fuscobasis	0	2010	2010-02-25	2008-02-03	2008	11.94	NonKeiki	1.94	2.06301	8.22	F3	EXS1	2012-02-02	No
Achatinella	fuscobasis	349	2010	2010-04-20	2008-05-09	2008	11.73	NonKeiki	1.73	1.94795	7.74	F3	ADULTS ONLY 2	2012-05-08	No
Achatinella	fuscobasis	0	2010	2010-04-29	2008-09-09	2008	11.16	NonKeiki	1.16	1.63562	8.61	F3	EXS1	2012-09-08	No
Achatinella	fuscobasis	0	2010	2010-04-29	2008-08-10	2008	11.31	NonKeiki	1.31	1.71781	7.49	F3	EXS1	2012-08-09	No
Achatinella	fuscobasis	0	2010	2010-04-29	2008-07-07	2008	11.48	NonKeiki	1.48	1.81096	8.59	F3	EXS1	2012-07-06	No
Achatinella	fuscobasis	338	2010	2010-07-14	2008-04-04	2008	12.33	NonKeiki	2.33	2.27671	9.04	F3	HIGH RATIO JUVENILLE 2	2012-04-03	No
Achatinella	fuscobasis	338	2010	2010-08-28	2008-12-11	2008	11.3	NonKeiki	1.3	1.71233	8.96	F3	HIGH RATIO JUVENILLE 2	2012-12-10	No
Achatinella	fuscobasis	0	2011	2011-01-03	2008-01-20	2008	13.57	NonKeiki	3.57	2.95616	9.23	F3	High Ratio Juvenille 2	2012-01-19	No
Achatinella	fuscobasis	0	2011	2011-12-15	2008-08-07	2008	14.3	NonKeiki	4.3	3.35616	10.13	F3	NONE	2012-02-05 12:00:00	No
Achatinella	fuscobasis	0	2012	2012-02-10	2008-07-07	2008	14.74	NonKeiki	4.74	3.59726	11.36	F3	POP1	2012-01-05 12:00:00	Yes
Achatinella	fuscobasis	0	2012	2012-02-10	2008-01-19	2008	15.59	NonKeiki	5.59	4.06301	10.89	F3	POP1	2011-07-19 12:00:00	Yes
Achatinella	fuscobasis	0	2012	2012-02-24	2008-04-22	2008	15.19	NonKeiki	5.19	3.84384	10.73	F3	POP1	2011-10-21 12:00:00	Yes
Achatinella	fuscobasis	0	2012	2012-03-09	2008-06-29	2008	14.92	NonKeiki	4.92	3.69589	10.11	F3	POP1	2011-12-28 12:00:00	Yes
Achatinella	fuscobasis	0	2012	2012-04-07	2008-06-08	2008	15.17	NonKeiki	5.17	3.83288	11.6	F3	POP3	2011-12-07 12:00:00	Yes
Achatinella	fuscobasis	0	2012	2012-04-13	2008-01-22	2008	15.89	NonKeiki	5.89	4.2274	11.44	F3	POP2	2011-07-22 12:00:00	Yes
Achatinella	fuscobasis	0	2012	2012-04-17	2008-07-30	2008	14.96	NonKeiki	4.96	3.71781	10.92	F3	POP3	2012-01-28 12:00:00	Yes
Achatinella	fuscobasis	0	2012	2012-04-18	2008-01-19	2008	15.93	NonKeiki	5.93	4.24932	11.24	F3	POP1	2011-07-19 12:00:00	Yes
Achatinella	fuscobasis	0	2012	2012-05-03	2008-10-12	2008	14.67	NonKeiki	4.67	3.5589	9.69	F3	POP2	2012-04-11 12:00:00	Yes	Y
Achatinella	fuscobasis	0	2012	2012-05-16	2008-04-16	2008	15.63	NonKeiki	5.63	4.08493	9.92	F3	POP2	2011-10-15 12:00:00	Yes
Achatinella	fuscobasis	0	2012	2012-05-29	2008-09-02	2008	15	NonKeiki	5	3.73973	10.79	F3	POP3	2012-03-02 12:00:00	Yes
Achatinella	fuscobasis	0	2012	2012-07-19	2008-12-20	2008	14.71	NonKeiki	4.71	3.58082	9.62	F3	POP2	2012-06-19 12:00:00	Yes	Y
Achatinella	fuscobasis	0	2012	2012-08-31	2008-09-16	2008	15.4	NonKeiki	5.4	3.9589	10.41	F3	POP3	2012-03-16 12:00:00	Yes
Achatinella	fuscobasis	0	2012	2012-08-31	2008-08-03	2008	15.62	NonKeiki	5.62	4.07945	10.63	F3	POP3	2012-02-01 12:00:00	Yes
Achatinella	fuscobasis	0	2012	2012-10-03	2008-01-24 09:36:00	2008	16.13	NonKeiki	6.13	4.69479	9.72	F3	POP1	2011-07-24 21:36:00	Yes
Achatinella	fuscobasis	0	2012	2012-11-02	2008-08-24	2008	15.83	NonKeiki	5.83	4.19452	11.88	F3	POP5	2012-02-22 12:00:00	Yes
Achatinella	fuscobasis	0	2012	2012-11-20	2008-01-19 14:24:00	2008	16.37	NonKeiki	6.37	4.83945	9.58	F3	POP2	2011-07-20 02:24:00	Yes
Achatinella	fuscobasis	0	2012	2012-12-14	2008-03-14 09:36:00	2008	16.23	NonKeiki	6.23	4.75507	10.02	F3	POP4	2011-09-12 21:36:00	Yes
Achatinella	fuscobasis	0	2012	2012-12-27	2008-04-22 19:12:00	2008	16.11	NonKeiki	6.11	4.68274	12.1	F3	POP5	2011-10-22 07:12:00	Yes
Achatinella	fuscobasis	0	2013	2013-07-15	2008-09-28	2008	16.3	NonKeiki	6.3	4.79726	9.95	F3	POP3	2012-03-28 12:00:00	Yes
Achatinella	fuscobasis	0	2013	2013-08-21	2008-10-21 19:12:00	2008	16.36	NonKeiki	6.36	4.83342	12.35	F3	POP3	2012-04-21 07:12:00	Yes
Achatinella	fuscobasis	0	2013	2013-08-21	2008-04-24 19:12:00	2008	16.58	NonKeiki	6.58	5.32658	9.08	F3	POP2	2011-10-24 07:12:00	Yes	Y
Achatinella	fuscobasis	0	2014	2014-01-27	2008-08-13 19:12:00	2008	16.78	NonKeiki	6.78	5.45808	10.34	F3	POP2	2012-02-12 07:12:00	Yes
Achatinella	fuscobasis	100 AFC	2014	2014-06-11	2008-08-26	2008	17	NonKeiki	7	5.79452		F3		2012-02-24 12:00:00	Yes
Achatinella	fuscobasis	118 AFC	2014	2014-06-11	2008-05-18	2008	17.4	NonKeiki	7.4	6.06849		F3		2011-11-16 12:00:00	Yes
Achatinella	fuscobasis	113 AFC	2014	2014-06-11	2008-01-14	2008	17.9	NonKeiki	7.9	6.41096		F3		2011-07-14 12:00:00	Yes
Achatinella	fuscobasis	0	2009	2009-01-04	2009-01-04	2009	2.76	Keiki	0	0	3.02	F4	POP2 Adult B 0105	2013-01-03	No
Achatinella	fuscobasis	0	2009	2009-01-04	2009-01-04	2009	3.38	Keiki	0	0	3.18	F4	POP1A Adult	2013-01-03	No
Achatinella	fuscobasis	0	2009	2009-01-04	2009-01-04	2009	3.4	Keiki	0	0	3.34	F4	POP1A Adult	2013-01-03	No
Achatinella	fuscobasis	0	2009	2009-01-08	2009-01-08	2009	3.42	Keiki	0	0	2.9	F4	POP2 Keiki 1204	2013-01-07	No
Achatinella	fuscobasis	0	2009	2009-01-08	2009-01-08	2009	3.68	Keiki	0	0	3.74	F4	POP2 Keiki 1204	2013-01-07	No
Achatinella	fuscobasis	0	2009	2009-01-09	2009-01-09	2009	3.18	Keiki	0	0	2.52	F4	1B Wigwam	2013-01-08	No
Achatinella	fuscobasis	0	2009	2009-02-26	2009-02-26	2009	4	Keiki	0	0	2.8	F4	OpenSpaces	2013-02-25	No
Achatinella	fuscobasis	0	2009	2009-03-12	2009-03-12	2009	3.54	Keiki	0	0	3.28	F4	POP2 Adult B	2013-03-11	No
Achatinella	fuscobasis	0	2009	2009-04-14	2009-04-14	2009	3.83	Keiki	0	0	2.72	F4	POP2 Keiki 1204	2013-04-13	No
Achatinella	fuscobasis	0	2009	2009-04-30	2009-04-30	2009	2.87	Keiki	0	0	2.16	F4	POP2 Keiki 1204	2013-04-29	No
Achatinella	fuscobasis	0	2009	2009-04-30	2009-04-30	2009	3	Keiki	0	0	2.39	F4	POP2 Keiki	2013-04-29	No
Achatinella	fuscobasis	0	2009	2009-05-08	2009-05-08	2009	3	Keiki	0	0	2.69	F4	1B Sweatlodge	2013-05-07	No
Achatinella	fuscobasis	0	2009	2009-05-08	2009-05-08	2009	3.55	Keiki	0	0	2.82	F4	OpenSpaces	2013-05-07	No
Achatinella	fuscobasis	0	2009	2009-06-01	2009-06-01	2009	2.15	Keiki	0	0	1.68	F4	OpenSpaces	2013-05-31	No
Achatinella	fuscobasis	0	2009	2009-06-01	2009-06-01	2009	3.79	Keiki	0	0	3.32	F4	OpenSpaces	2013-05-31	No
Achatinella	fuscobasis	0	2009	2009-06-02	2009-06-02	2009	3.42	Keiki	0	0	3.65	F4	POP2 Adult B 0105	2013-06-01	No
Achatinella	fuscobasis	0	2009	2009-06-02	2009-06-02	2009	3.54	Keiki	0	0	2.86	F4	POP2 Adult B	2013-06-01	No
Achatinella	fuscobasis	0	2009	2009-06-11	2009-06-11	2009	3.76	Keiki	0	0	3.6	F4	OpenSpaces	2013-06-10	No
Achatinella	fuscobasis	0	2009	2009-06-15	2009-05-21 07:03:31	2009	4.42	Keiki	0.42	0.0676873	3.42	F4	POP2 Keiki B	2013-05-20 07:03:31	No
Achatinella	fuscobasis	0	2009	2009-06-17	2009-06-17	2009	3.2	Keiki	0	0	2.28	F4	1B Sweatlodge	2013-06-16	No
Achatinella	fuscobasis	0	2009	2009-06-26	2009-04-18 18:21:10	2009	5.16	Keiki	1.16	0.186946	3.88	F4	EXS MIXED	2013-04-17 18:21:10	No
Achatinella	fuscobasis	0	2009	2009-06-29	2009-06-29	2009	2.94	Keiki	0	0	2.24	F4	1B Sweatlodge	2013-06-28	No
Achatinella	fuscobasis	0	2009	2009-06-30	2009-06-30	2009	2.65	Keiki	0	0	2.01	F4	ADULTS ONLY 2	2013-06-29	No
Achatinella	fuscobasis	0	2009	2009-08-02	2009-08-02	2009	3.24	Keiki	0	0	2.68	F4	HAK1	2013-08-01	No
Achatinella	fuscobasis	0	2009	2009-08-13	2009-07-26 22:35:17	2009	4.29	Keiki	0.29	0.0467365	2.84	F4	HAK1	2013-07-25 22:35:17	No
Achatinella	fuscobasis	0	2009	2009-09-10	2009-09-10	2009	3.06	Keiki	0	0	1.61	F4	HAK1	2013-09-09	No
Achatinella	fuscobasis	0	2009	2009-09-14	2009-03-27 09:52:56	2009	6.9	Keiki	2.9	0.467365	4.86	F4	EXS1	2013-03-26 09:52:56	No
Achatinella	fuscobasis	0	2009	2009-09-23	2009-09-23	2009	3.25	Keiki	0	0	2.55	F4	LAK1	2013-09-22	No
Achatinella	fuscobasis	0	2009	2009-09-23	2009-09-11 05:38:49	2009	4.2	Keiki	0.2	0.0322321	3.45	F4	LAK1	2013-09-10 05:38:49	No
Achatinella	fuscobasis	0	2009	2009-10-24	2009-10-24	2009	2.08	Keiki	0	0	2.14	F4	High Density Keiki 2	2013-10-23	No
Achatinella	fuscobasis	0	2009	2009-10-24	2009-10-24	2009	2.96	Keiki	0	0	2.39	F4	HIGH DENSITY KEIKI 1	2013-10-23	No
Achatinella	fuscobasis	0	2009	2009-10-26	2009-10-26	2009	3.59	Keiki	0	0	2.29	F4	LOW DENSITY KEIKI 1	2013-10-25	No
Achatinella	fuscobasis	0	2009	2009-11-06	2009-11-06	2009	2.78	Keiki	0	0	2.94	F4	LOW DENSITY KEIKI 1	2013-11-05	No
Achatinella	fuscobasis	0	2009	2009-11-06	2009-11-06	2009	3.83	Keiki	0	0	4.03	F4	HIGH DENSITY KEIKI 1	2013-11-05	No
Achatinella	fuscobasis	0	2009	2009-11-06	2009-10-27	2009	4.17	Keiki	0.17	0.0273973	3.17	F4	HIGH DENSITY KEIKI 1	2013-10-26	No
Achatinella	fuscobasis	0	2009	2009-11-20	2009-11-20	2009	3.4	Keiki	0	0	3.28	F4	LOW DENSITY KEIKI 1	2013-11-19	No
Achatinella	fuscobasis	0	2009	2009-11-20	2009-10-30 09:52:56	2009	4.35	Keiki	0.35	0.0564061	3.87	F4	LOW DENSITY KEIKI 1	2013-10-29 09:52:56	No
Achatinella	fuscobasis	0	2009	2009-11-20	2009-10-09 19:45:52	2009	4.7	Keiki	0.7	0.112812	4.35	F4	LOW DENSITY KEIKI 1	2013-10-08 19:45:52	No
Achatinella	fuscobasis	0	2009	2009-12-03	2009-04-29 08:28:14	2009	7.7	Keiki	3.7	0.596293	6.58	F4	EXS4	2013-04-28 08:28:14	No
Achatinella	fuscobasis	0	2009	2009-12-16	2009-12-16	2009	2.82	Keiki	0	0	2.74	F4	POP1A Keiki	2013-12-15	No
Achatinella	fuscobasis	0	2009	2009-12-24	2009-03-03 02:49:24	2009	9.03	Keiki	5.03	0.810637	7.09	F4	EXS2	2013-03-02 02:49:24	No
Achatinella	fuscobasis	0	2010	2010-02-09	2009-11-27 11:17:38	2009	5.25	Keiki	1.25	0.20145	4.01	F4	EXS2	2013-11-26 11:17:38	No
Achatinella	fuscobasis	0	2010	2010-02-09	2009-07-01 15:31:45	2009	7.78	Keiki	3.78	0.609186	5.35	F4	EXS2	2013-06-30 15:31:45	No
Achatinella	fuscobasis	0	2010	2010-02-23	2009-07-26 19:45:52	2009	7.59	Keiki	3.59	0.578566	5.67	F4	EXS1	2013-07-25 19:45:52	No
Achatinella	fuscobasis	0	2010	2010-02-23	2009-07-06 05:38:49	2009	7.94	Keiki	3.94	0.634972	5.8	F4	EXS1	2013-07-05 05:38:49	No
Achatinella	fuscobasis	0	2010	2010-02-23	2009-05-01 22:35:17	2009	9.05	Keiki	5.05	0.81386	6.8	F4	EXS1	2013-04-30 22:35:17	No
Achatinella	fuscobasis	0	2010	2010-03-12	2009-11-03 04:14:07	2009	6.19	Keiki	2.19	0.352941	4.39	F4	EXS1	2013-11-02 04:14:07	No
Achatinella	fuscobasis	0	2010	2010-03-12	2009-09-11 19:45:52	2009	7.08	Keiki	3.08	0.496374	5.88	F4	EXS1	2013-09-10 19:45:52	No
Achatinella	fuscobasis	0	2010	2010-03-12	2009-08-08 16:56:28	2009	7.66	Keiki	3.66	0.589847	6.08	F4	EXS1	2013-08-07 16:56:28	No
Achatinella	fuscobasis	0	2010	2010-04-06	2009-01-12	2009	10.42	NonKeiki	0.42	1.23014	7.44	F4	EXS1	2013-01-11	No
Achatinella	fuscobasis	0	2010	2010-04-20	2009-10-29 01:24:42	2009	6.94	Keiki	2.94	0.473811	4.87	F4	High Density Keiki 2	2013-10-28 01:24:42	No
Achatinella	fuscobasis	0	2010	2010-05-18	2009-11-14 21:10:35	2009	7.13	Keiki	3.13	0.504432	5.34	F4	EXS1	2013-11-13 21:10:35	No
Achatinella	fuscobasis	0	2010	2010-05-18	2009-01-24	2009	10.57	NonKeiki	0.57	1.31233	7.53	F4	EXS1	2013-01-23	No
Achatinella	fuscobasis	319	2010	2010-08-10	2009-11-03	2009	8.76	Keiki	4.76	0.767123	7.55	F4	HIGH RATIO JUVENILLE 1	2013-11-02	No
Achatinella	fuscobasis	0	2011	2011-06-20	2009-12-12	2009	10.95	NonKeiki	0.95	1.52055	7.46	F4	POP5	2013-12-11	No
Achatinella	fuscobasis	0	2011	2011-11-11	2009-09-15	2009	12.11	NonKeiki	2.11	2.15616	9.71	F4	POP1	2013-09-14	No
Achatinella	fuscobasis	0	2012	2012-01-25	2009-03-06	2009	13.45	NonKeiki	3.45	2.89041	9.74	F4	POP1	2013-03-05	No	Y
Achatinella	fuscobasis	0	2012	2012-03-23	2009-03-12	2009	13.71	NonKeiki	3.71	3.03288	11.06	F4	POP3	2013-03-11	No
Achatinella	fuscobasis	0	2012	2012-09-14	2009-07-17	2009	13.95	NonKeiki	3.95	3.16438	10.33	F4	POP2	2013-07-16	No	Y
Achatinella	fuscobasis	0	2012	2012-11-02	2009-08-23	2009	14.01	NonKeiki	4.01	3.19726	11.39	F4	POP5	2013-08-22	No	Y
Achatinella	fuscobasis	0	2012	2012-11-11	2009-12-06	2009	13.53	NonKeiki	3.53	2.93425	10	F4	POP2	2013-12-05	No
Achatinella	fuscobasis	0	2012	2012-11-11	2009-08-16	2009	14.09	NonKeiki	4.09	3.2411	10.02	F4	POP2	2013-08-15	No
Achatinella	fuscobasis	0	2013	2013-01-24	2009-12-30	2009	13.78	NonKeiki	3.78	3.07123	9.78	F4	POP5	2013-12-29	No
Achatinella	fuscobasis	0	2013	2013-01-03	2009-05-07	2009	14.86	NonKeiki	4.86	3.66301	10.8	F4	POP2 Adult B	2012-11-04 12:00:00	Yes
Achatinella	fuscobasis	0	2013	2013-01-03	2009-05-03	2009	14.88	NonKeiki	4.88	3.67397	10.23	F4	POP 4	2012-10-31 12:00:00	Yes
Achatinella	fuscobasis	0	2013	2013-04-24	2009-06-11	2009	15.24	NonKeiki	5.24	3.87123	11.04	F4	POP5	2012-12-09 12:00:00	Yes
Achatinella	fuscobasis	0	2013	2013-05-10	2009-10-29	2009	14.62	NonKeiki	4.62	3.53151	8.02	F4	POP1A Adult	2013-04-28 12:00:00	Yes	Y
Achatinella	fuscobasis	0	2013	2013-07-15	2009-05-24	2009	15.74	NonKeiki	5.74	4.14521	11.05	F4	POP2	2012-11-21 12:00:00	Yes
Achatinella	fuscobasis	0	2013	2013-07-24	2009-09-28	2009	15.15	NonKeiki	5.15	3.82192	9.91	F4	POP1	2013-03-28 12:00:00	Yes	Y
Achatinella	fuscobasis	0	2013	2013-07-24	2009-08-19	2009	15.35	NonKeiki	5.35	3.93151	9.45	F4	POP1	2013-02-16 12:00:00	Yes	Y
Achatinella	fuscobasis	0	2013	2013-10-03	2009-09-11	2009	15.59	NonKeiki	5.59	4.06301	9.48	F4	Pop 3	2013-03-11 12:00:00	Yes
Achatinella	fuscobasis	0	2013	2013-10-18	2009-01-14 04:48:00	2009	16.24	NonKeiki	6.24	4.7611	10.5	F4	POP3	2012-07-14 16:48:00	Yes
Achatinella	fuscobasis	0	2013	2013-11-14	2009-09-19	2009	15.76	NonKeiki	5.76	4.15616	10.44	F4	POP2	2013-03-19 12:00:00	Yes
Achatinella	fuscobasis	0	2014	2014-01-03	2009-03-01 09:36:00	2009	16.38	NonKeiki	6.38	4.84548	10.59	F4	POP2	2012-08-29 21:36:00	Yes
Achatinella	fuscobasis	90 AFC	2014	2014-06-11	2009-10-30	2009	16	NonKeiki	6	4.61644		F4		2013-04-29 12:00:00	Yes
Achatinella	fuscobasis	20 AFC	2014	2014-06-11	2009-10-08	2009	16.1	NonKeiki	6.1	4.67671		F4		2013-04-07 12:00:00	Yes
Achatinella	fuscobasis	115 AFC	2014	2014-06-11	2009-10-08	2009	16.1	NonKeiki	6.1	4.67671		F4		2013-04-07 12:00:00	Yes
Achatinella	fuscobasis	28 AFC	2014	2014-06-11	2009-09-16	2009	16.2	NonKeiki	6.2	4.73699		F4		2013-03-16 12:00:00	Yes
Achatinella	fuscobasis	106 AFC	2014	2014-06-11	2009-08-03	2009	16.4	NonKeiki	6.4	4.85753		F4		2013-01-31 12:00:00	Yes
Achatinella	fuscobasis	111 AFC	2014	2014-06-11	2009-08-03	2009	16.4	NonKeiki	6.4	4.85753		F4		2013-01-31 12:00:00	Yes
Achatinella	fuscobasis	22 AFC	2014	2014-06-11	2009-03-04	2009	16.5	NonKeiki	6.5	5.27397		F4		2012-09-01 12:00:00	Yes
Achatinella	fuscobasis	112 AFC	2014	2014-06-11	2009-02-08	2009	16.6	NonKeiki	6.6	5.33973		F4		2012-08-08 12:00:00	Yes
Achatinella	fuscobasis	0	2010	2010-01-08	2010-01-08	2010	2.4	Keiki	0	0	2.35	F4	High Density Keiki 2	2014-01-07	No
Achatinella	fuscobasis	0	2010	2010-01-26	2010-01-26	2010	4	Keiki	0	0	3.2	F4	High Density Keiki 2	2014-01-25	No
Achatinella	fuscobasis	0	2010	2010-01-28	2010-01-28	2010	3.47	Keiki	0	0	2.67	F4	High Density Keiki 2	2014-01-27	No
Achatinella	fuscobasis	0	2010	2010-02-09	2010-02-09	2010	2.52	Keiki	0	0	2.09	F4	EXS2	2014-02-08	No
Achatinella	fuscobasis	0	2010	2010-02-09	2010-02-09	2010	3.13	Keiki	0	0	2.24	F4	EXS2	2014-02-08	No
Achatinella	fuscobasis	0	2010	2010-02-09	2010-02-09	2010	3.81	Keiki	0	0	3.06	F4	EXS2	2014-02-08	No
Achatinella	fuscobasis	0	2010	2010-02-19	2010-02-19	2010	3.85	Keiki	0	0	3.38	F4	EXS2	2014-02-18	No
Achatinella	fuscobasis	0	2010	2010-02-23	2010-02-23	2010	3.49	Keiki	0	0	2.84	F4	EXS1	2014-02-22	No
Achatinella	fuscobasis	0	2010	2010-02-25	2010-02-25	2010	3.17	Keiki	0	0	2.69	F4	EXS1	2014-02-24	No
Achatinella	fuscobasis	0	2010	2010-02-25	2010-02-25	2010	3.44	Keiki	0	0	2.73	F4	EXS1	2014-02-24	No
Achatinella	fuscobasis	0	2010	2010-02-25	2010-02-25	2010	3.71	Keiki	0	0	3.02	F4	EXS1	2014-02-24	No
Achatinella	fuscobasis	0	2010	2010-02-25	2010-02-25	2010	3.73	Keiki	0	0	3.09	F4	EXS1	2014-02-24	No
Achatinella	fuscobasis	0	2010	2010-02-25	2010-02-25	2010	3.9	Keiki	0	0	3.42	F4	EXS1	2014-02-24	No
Achatinella	fuscobasis	0	2010	2010-02-25	2010-01-08 08:28:14	2010	4.81	Keiki	0.81	0.13054	4.35	F4	LOW DENSITY KEIKI 1	2014-01-07 08:28:14	No
Achatinella	fuscobasis	0	2010	2010-03-05	2010-03-05	2010	2.89	Keiki	0	0	2.48	F4	HIGH DENSITY KEIKI 1	2014-03-04	No
Achatinella	fuscobasis	0	2010	2010-03-05	2010-03-05	2010	3.07	Keiki	0	0	2.28	F4	HIGH DENSITY KEIKI 1	2014-03-04	No
Achatinella	fuscobasis	0	2010	2010-04-02	2010-04-02	2010	3.31	Keiki	0	0	2.5	F4	Low Density Keiki 1	2014-04-01	No
Achatinella	fuscobasis	0	2010	2010-04-02	2010-04-02	2010	3.42	Keiki	0	0	2.62	F4	High Density Keiki 2	2014-04-01	No
Achatinella	fuscobasis	0	2010	2010-04-02	2010-03-21 05:38:49	2010	4.2	Keiki	0.2	0.0322321	3.56	F4	High Density Keiki 2	2014-03-20 05:38:49	No
Achatinella	fuscobasis	0	2010	2010-04-05	2010-01-31 11:17:38	2010	5.08	Keiki	1.08	0.174053	4.06	F4	High Density Keiki 2	2014-01-30 11:17:38	No
Achatinella	fuscobasis	0	2010	2010-04-06	2010-04-06	2010	3.52	Keiki	0	0	3.17	F4	EXS1	2014-04-05	No
Achatinella	fuscobasis	0	2010	2010-04-06	2010-04-01 07:03:31	2010	4.08	Keiki	0.08	0.0128928	3.1	F4	EXS1	2014-03-31 07:03:31	No
Achatinella	fuscobasis	0	2010	2010-04-15	2010-04-15	2010	2.74	Keiki	0	0	2.35	F4	High Density Keiki 2	2014-04-14	No
Achatinella	fuscobasis	0	2010	2010-05-10	2010-05-10	2010	3.55	Keiki	0	0	2.97	F4	Low Density Keiki 1	2014-05-09	No
Achatinella	fuscobasis	0	2010	2010-05-18	2010-05-18	2010	3.61	Keiki	0	0	3.21	F4	High Density Keiki 2	2014-05-17	No
Achatinella	fuscobasis	0	2010	2010-06-04	2010-06-04	2010	2.11	Keiki	0	0	1.85	F4	Low Ratio Juvenille 1	2014-06-03	No
Achatinella	fuscobasis	0	2010	2010-06-15	2010-06-15	2010	3.63	Keiki	0	0	2.75	F4	Low Ratio Juvenille 1	2014-06-14	No
Achatinella	fuscobasis	0	2010	2010-07-14	2010-03-06	2010	6.21	Keiki	2.21	0.356164	5.06	F4	High Ratio Juvenille 2	2014-03-05	No
Achatinella	fuscobasis	0	2010	2010-07-14	2010-03-04 19:45:52	2010	6.23	Keiki	2.23	0.359388	3.46	F4	High Ratio Juvenille 2	2014-03-03 19:45:52	No
Achatinella	fuscobasis	0	2010	2010-07-26	2010-07-26	2010	2.44	Keiki	0	0	2.2	F4	Low Ratio Juvenille 1	2014-07-25	No
Achatinella	fuscobasis	0	2010	2010-07-27	2010-07-27	2010	3.27	Keiki	0	0	2.59	F4	EXS1	2014-07-26	No
Achatinella	fuscobasis	0	2010	2010-09-15	2010-09-09 16:56:28	2010	4.09	Keiki	0.09	0.0145044	3.65	F4	EXS1	2014-09-08 16:56:28	No
Achatinella	fuscobasis	0	2010	2010-10-28	2010-10-28	2010	2.71	Keiki	0	0	3.05	F4	High Ratio Juvenille 1	2014-10-27	No
Achatinella	fuscobasis	0	2010	2010-10-28	2010-10-28	2010	3.49	Keiki	0	0	3.63	F4	High Ratio Juvenille 1	2014-10-27	No
Achatinella	fuscobasis	0	2010	2010-11-12	2010-10-18 07:03:31	2010	4.42	Keiki	0.42	0.0676873	3.74	F4	EXS1	2014-10-17 07:03:31	No
Achatinella	fuscobasis	0	2010	2010-11-30	2010-11-30	2010	2.56	Keiki	0	0	2.26	F4	High Ratio Juvenille 1	2014-11-29	No
Achatinella	fuscobasis	0	2010	2010-12-03	2010-12-03	2010	2.75	Keiki	0	0	2.5	F4	Low Ratio Juvenille 1	2014-12-02	No
Achatinella	fuscobasis	0	2012	2012-09-14	2010-03-08	2010	12.78	NonKeiki	2.78	2.52329	9.39	F4	POP2	2014-03-07	No	Y
Achatinella	fuscobasis	0	2012	2012-10-18	2010-04-01	2010	12.83	NonKeiki	2.83	2.55068	10.81	F4	POP2	2014-03-31	No
Achatinella	fuscobasis	0	2012	2012-11-14	2010-04-30	2010	12.82	NonKeiki	2.82	2.54521	8.79	F4	POP1	2014-04-29	No	Y
Achatinella	fuscobasis	0	2013	2013-01-08	2010-03-28	2010	13.26	NonKeiki	3.26	2.7863	10	F4	POP1	2014-03-27	No
Achatinella	fuscobasis	0	2013	2013-01-24	2010-03-04	2010	13.46	NonKeiki	3.46	2.89589	9.67	F4	POP5	2014-03-03	No	Y
Achatinella	fuscobasis	0	2013	2013-02-02	2010-03-27	2010	13.39	NonKeiki	3.39	2.85753	11.24	F4	POP5	2014-03-26	No	Y
Achatinella	fuscobasis	0	2013	2013-02-20	2010-01-02	2010	13.9	NonKeiki	3.9	3.13699	10.78	F4	POP1	2014-01-01	No	Y
Achatinella	fuscobasis	0	2013	2013-04-04	2010-07-22	2010	13.11	NonKeiki	3.11	2.70411	11.18	F4	POP5	2014-07-21	No	Y
Achatinella	fuscobasis	0	2013	2013-04-19	2010-10-27	2010	12.7	NonKeiki	2.7	2.47945	10.25	F4	POP4	2014-10-26	No	Y
Achatinella	fuscobasis	0	2013	2013-05-06	2010-02-10	2010	14.08	NonKeiki	4.08	3.23562	10.35	F4	POP3	2014-02-09	No
Achatinella	fuscobasis	0	2013	2013-05-16	2010-09-16	2010	13.04	NonKeiki	3.04	2.66575	7.44	F4	POP4	2014-09-15	No
Achatinella	fuscobasis	0	2013	2013-05-31	2010-05-26	2010	13.68	NonKeiki	3.68	3.01644	9.94	F4	POP4	2014-05-25	No	Y
Achatinella	fuscobasis	0	2013	2013-07-15	2010-10-14	2010	13.2	NonKeiki	3.2	2.75342	10.76	F4	POP2	2014-10-13	No
Achatinella	fuscobasis	0	2013	2013-09-05	2010-10-10	2010	13.48	NonKeiki	3.48	2.90685	10.08	F4	Pop 2	2014-10-09	No
Achatinella	fuscobasis	0	2013	2013-09-19	2010-08-07	2010	13.87	NonKeiki	3.87	3.12055	10.83	F4	POP4	2014-08-06	No	Y
Achatinella	fuscobasis	0	2013	2013-10-03	2010-12-09	2010	13.32	NonKeiki	3.32	2.81918	10.16	F4	Pop 5	2014-12-08	No
Achatinella	fuscobasis	0	2013	2013-10-03	2010-08-27	2010	13.84	NonKeiki	3.84	3.10411	9.88	F4	Pop 3	2014-08-26	No
Achatinella	fuscobasis	0	2013	2013-10-03	2010-08-17	2010	13.89	NonKeiki	3.89	3.13151	9.69	F4	Pop 3	2014-08-16	No
Achatinella	fuscobasis	0	2013	2013-10-03	2010-05-09	2010	14.39	NonKeiki	4.39	3.40548	10.39	F4	Pop 2	2013-11-06 12:00:00	No
Achatinella	fuscobasis	0	2013	2013-10-18	2010-10-15	2010	13.67	NonKeiki	3.67	3.01096	9.44	F4	Pop 3	2014-10-14	No
Achatinella	fuscobasis	0	2013	2013-12-10	2010-09-24	2010	14.04	NonKeiki	4.04	3.2137	10.3	F4	Pop 3	2014-09-23	No
Achatinella	fuscobasis	0	2014	2014-01-27	2010-11-03	2010	14.08	NonKeiki	4.08	3.23562	9.55	F4	Pop 3	2014-11-02	No
Achatinella	fuscobasis	0	2014	2014-01-29	2010-12-01	2010	13.95	NonKeiki	3.95	3.16438	9.98	F4	Pop 3	2014-11-30	No
Achatinella	fuscobasis	76 AFC	2014	2014-06-11	2010-12-24	2010	14.5	NonKeiki	4.5	3.46575		F4		2014-06-23 12:00:00	No
Achatinella	fuscobasis	84 AFC	2014	2014-06-11	2010-12-24	2010	14.5	NonKeiki	4.5	3.46575		F4		2014-06-23 12:00:00	No
Achatinella	fuscobasis	0	2013	2013-11-10	2010-01-23	2010	15.11	NonKeiki	5.11	3.8	11.59	F4	POP5	2013-07-23 12:00:00	Yes
Achatinella	fuscobasis	0	2014	2014-01-03	2010-06-06	2010	14.71	NonKeiki	4.71	3.58082	10.32	F4	Pop 4	2013-12-04 12:00:00	Yes
Achatinella	fuscobasis	0	2014	2014-01-13	2010-06-30	2010	14.64	NonKeiki	4.64	3.54247	12.61	F4	POP2 Adult B	2013-12-28 12:00:00	Yes
Achatinella	fuscobasis	0	2014	2014-02-13	2010-03-23	2010	15.29	NonKeiki	5.29	3.89863	12.9	F4	Pop 3	2013-09-20 12:00:00	Yes
Achatinella	fuscobasis	0	2014	2014-03-27	2010-05-02	2010	15.3	NonKeiki	5.3	3.90411	12.45	F4	POP3	2013-10-30 12:00:00	Yes
Achatinella	fuscobasis	101 AFC	2014	2014-06-11	2010-12-04	2010	14.6	NonKeiki	4.6	3.52055		F4		2014-06-03 12:00:00	Yes
Achatinella	fuscobasis	24 AFC	2014	2014-06-11	2010-11-14	2010	14.7	NonKeiki	4.7	3.57534		F4		2014-05-14 12:00:00	Yes
Achatinella	fuscobasis	26 AFC	2014	2014-06-11	2010-11-14	2010	14.7	NonKeiki	4.7	3.57534		F4		2014-05-14 12:00:00	Yes
Achatinella	fuscobasis	77 AFC	2014	2014-06-11	2010-11-14	2010	14.7	NonKeiki	4.7	3.57534		F4		2014-05-14 12:00:00	Yes
Achatinella	fuscobasis	103 AFC	2014	2014-06-11	2010-11-14	2010	14.7	NonKeiki	4.7	3.57534		F4		2014-05-14 12:00:00	Yes
Achatinella	fuscobasis	69 AFC	2014	2014-06-11	2010-10-25	2010	14.8	NonKeiki	4.8	3.63014		F4		2014-04-24 12:00:00	Yes
Achatinella	fuscobasis	105 AFC	2014	2014-06-11	2010-09-15	2010	15	NonKeiki	5	3.73973		F4		2014-03-15 12:00:00	Yes
Achatinella	fuscobasis	53 AFC	2014	2014-06-11	2010-08-26	2010	15.1	NonKeiki	5.1	3.79452		F4		2014-02-23 12:00:00	Yes
Achatinella	fuscobasis	86 AFC	2014	2014-06-11	2010-08-26	2010	15.1	NonKeiki	5.1	3.79452		F4		2014-02-23 12:00:00	Yes
Achatinella	fuscobasis	89 AFC	2014	2014-06-11	2010-08-26	2010	15.1	NonKeiki	5.1	3.79452		F4		2014-02-23 12:00:00	Yes
Achatinella	fuscobasis	104 AFC	2014	2014-06-11	2010-08-06	2010	15.2	NonKeiki	5.2	3.84932		F4		2014-02-03 12:00:00	Yes
Achatinella	fuscobasis	25 AFC	2014	2014-06-11	2010-06-27	2010	15.4	NonKeiki	5.4	3.9589		F4		2013-12-25 12:00:00	Yes
Achatinella	fuscobasis	27 AFC	2014	2014-06-11	2010-06-27	2010	15.4	NonKeiki	5.4	3.9589		F4		2013-12-25 12:00:00	Yes
Achatinella	fuscobasis	82 AFC	2014	2014-06-11	2010-06-27	2010	15.4	NonKeiki	5.4	3.9589		F4		2013-12-25 12:00:00	Yes
Achatinella	fuscobasis	23 AFC	2014	2014-06-11	2010-06-07	2010	15.5	NonKeiki	5.5	4.0137		F4		2013-12-05 12:00:00	Yes
Achatinella	fuscobasis	58 AFC	2014	2014-06-11	2010-06-07	2010	15.5	NonKeiki	5.5	4.0137		F4		2013-12-05 12:00:00	Yes
Achatinella	fuscobasis	114 AFC	2014	2014-06-11	2010-06-07	2010	15.5	NonKeiki	5.5	4.0137		F4		2013-12-05 12:00:00	Yes
Achatinella	fuscobasis	79 AFC	2014	2014-06-11	2010-05-18	2010	15.6	NonKeiki	5.6	4.06849		F4		2013-11-15 12:00:00	Yes
Achatinella	fuscobasis	80 AFC	2014	2014-06-11	2010-04-28	2010	15.7	NonKeiki	5.7	4.12329		F4		2013-10-26 12:00:00	Yes
Achatinella	fuscobasis	87 AFC	2014	2014-06-11	2010-04-08	2010	15.8	NonKeiki	5.8	4.17808		F4		2013-10-06 12:00:00	Yes
Achatinella	fuscobasis	0	2011	2011-03-02	2011-03-02	2011	2.64	Keiki	0	0	2.72	F4	POP2	2015-03-01	No
Achatinella	fuscobasis	0	2011	2011-03-22	2011-03-22	2011	2.57	Keiki	0	0	2.53	F4	POP1	2015-03-21	No
Achatinella	fuscobasis	0	2011	2011-03-22	2011-03-22	2011	2.66	Keiki	0	0	2.94	F4	POP2	2015-03-21	No
Achatinella	fuscobasis	0	2011	2011-05-03	2011-05-03	2011	1.93	Keiki	0	0	2.02	F4	POP2	2015-05-02	No
Achatinella	fuscobasis	0	2011	2011-05-04	2011-05-04	2011	2.89	Keiki	0	0	3.3	F4	POP4	2015-05-03	No
Achatinella	fuscobasis	0	2011	2011-06-28	2011-06-28	2011	3.29	Keiki	0	0	2.51	F4	POP4	2015-06-27	No
Achatinella	fuscobasis	0	2011	2011-10-19	2011-10-19	2011	2.12	Keiki	0	0	1.97	F4	POP2	2015-10-18	No
Achatinella	fuscobasis	0	2011	2011-10-19	2011-10-19	2011	2.72	Keiki	0	0	2.84	F4	POP2	2015-10-18	No
Achatinella	fuscobasis	0	2011	2011-11-15	2011-11-15	2011	3.3	Keiki	0	0	3.05	F4	POP1	2015-11-14	No
Achatinella	fuscobasis	0	2011	2011-11-17	2011-11-17	2011	3.1	Keiki	0	0	3	F4	POP2	2015-11-16	No
Achatinella	fuscobasis	0	2012	2012-07-12	2011-05-22	2011	10.26	NonKeiki	0.26	1.14247	8.73	F4	POP5	2015-05-21	No
Achatinella	fuscobasis	0	2012	2012-10-04	2011-08-14	2011	10.26	NonKeiki	0.26	1.14247	8.49	F4	POP2	2015-08-13	No
Achatinella	fuscobasis	0	2012	2012-11-28	2011-12-11 15:31:45	2011	9.99	Keiki	5.99	0.965351	7.53	F4	POP2	2015-12-10 15:31:45	No
Achatinella	fuscobasis	0	2012	2012-12-14	2011-10-08	2011	10.34	NonKeiki	0.34	1.1863	11.97	F4	POP2	2015-10-07	No	Y
Achatinella	fuscobasis	0	2013	2013-01-10	2011-07-29	2011	10.83	NonKeiki	0.83	1.45479	8.98	F4	POP4	2015-07-28	No
Achatinella	fuscobasis	0	2013	2013-07-24	2011-05-21	2011	12.15	NonKeiki	2.15	2.17808	9.67	F4	POP1	2015-05-20	No
Achatinella	fuscobasis	0	2013	2013-08-03	2011-11-05	2011	11.36	NonKeiki	1.36	1.74521	7.83	F4	POP1	2015-11-04	No
Achatinella	fuscobasis	0	2013	2013-09-05	2011-07-15	2011	12.09	NonKeiki	2.09	2.14521	9.12	F4	POP1	2015-07-14	No
Achatinella	fuscobasis	0	2013	2013-11-14	2011-03-27	2011	12.99	NonKeiki	2.99	2.63836	7.99	F4	POP4	2015-03-26	No
Achatinella	fuscobasis	0	2013	2013-11-21	2011-05-31	2011	12.7	NonKeiki	2.7	2.47945	9.77	F4	POP3	2015-05-30	No
Achatinella	fuscobasis	0	2013	2013-12-10	2011-02-27	2011	13.26	NonKeiki	3.26	2.7863	9.99	F4	POP 4	2015-02-26	No
Achatinella	fuscobasis	0	2014	2014-01-03	2011-04-22	2011	13.11	NonKeiki	3.11	2.70411	9.79	F4	POP2 Adult B	2015-04-21	No
Achatinella	fuscobasis	0	2014	2014-01-13	2011-05-20	2011	13.02	NonKeiki	3.02	2.65479	12.14	F4	POP2 Adult B	2015-05-19	No
Achatinella	fuscobasis	0	2014	2014-01-15	2011-08-14	2011	12.6	NonKeiki	2.6	2.42466	8.83	F4	POP1	2015-08-13	No
Achatinella	fuscobasis	0	2014	2014-01-27	2011-03-01	2011	13.49	NonKeiki	3.49	2.91233	9.85	F4	Pop3	2015-02-28	No
Achatinella	fuscobasis	83 AFC	2014	2014-06-11	2011-11-29	2011	12.8	NonKeiki	2.8	2.53425		F4		2015-11-28	No
Achatinella	fuscobasis	45 AFC	2014	2014-06-11	2011-11-09	2011	12.9	NonKeiki	2.9	2.58904		F4		2015-11-08	No
Achatinella	fuscobasis	109 AFC	2014	2014-06-11	2011-11-09	2011	12.9	NonKeiki	2.9	2.58904		F4		2015-11-08	No
Achatinella	fuscobasis	46 AFC	2014	2014-06-11	2011-09-30	2011	13.1	NonKeiki	3.1	2.69863		F4		2015-09-29	No
Achatinella	fuscobasis	61 AFC	2014	2014-06-11	2011-09-30	2011	13.1	NonKeiki	3.1	2.69863		F4		2015-09-29	No
Achatinella	fuscobasis	67 AFC	2014	2014-06-11	2011-09-30	2011	13.1	NonKeiki	3.1	2.69863		F4		2015-09-29	No
Achatinella	fuscobasis	117 AFC	2014	2014-06-11	2011-09-30	2011	13.1	NonKeiki	3.1	2.69863		F4		2015-09-29	No
Achatinella	fuscobasis	47 AFC	2014	2014-06-11	2011-09-10	2011	13.2	NonKeiki	3.2	2.75342		F4		2015-09-09	No
Achatinella	fuscobasis	49 AFC	2014	2014-06-11	2011-09-10	2011	13.2	NonKeiki	3.2	2.75342		F4		2015-09-09	No
Achatinella	fuscobasis	68 AFC	2014	2014-06-11	2011-09-10	2011	13.2	NonKeiki	3.2	2.75342		F4		2015-09-09	No
Achatinella	fuscobasis	21 AFC	2014	2014-06-11	2011-08-21	2011	13.3	NonKeiki	3.3	2.80822		F4		2015-08-20	No
Achatinella	fuscobasis	108 AFC	2014	2014-06-11	2011-08-01	2011	13.4	NonKeiki	3.4	2.86301		F4		2015-07-31	No
Achatinella	fuscobasis	54 AFC	2014	2014-06-11	2011-06-22	2011	13.6	NonKeiki	3.6	2.9726		F4		2015-06-21	No
Achatinella	fuscobasis	88 AFC	2014	2014-06-11	2011-06-22	2011	13.6	NonKeiki	3.6	2.9726		F4		2015-06-21	No
Achatinella	fuscobasis	107 AFC	2014	2014-06-11	2011-06-22	2011	13.6	NonKeiki	3.6	2.9726		F4		2015-06-21	No
Achatinella	fuscobasis	85 AFC	2014	2014-06-11	2011-04-23	2011	13.9	NonKeiki	3.9	3.13699		F4		2015-04-22	No
Achatinella	fuscobasis	56 AFC	2014	2014-06-11	2011-03-14	2011	14.1	NonKeiki	4.1	3.24658		F4		2015-03-13	No
Achatinella	fuscobasis	110 AFC	2014	2014-06-11	2011-02-02	2011	14.3	NonKeiki	4.3	3.35616		F4		2014-08-02 12:00:00	No
Achatinella	fuscobasis	0	2012	2012-01-10	2012-01-10	2012	3.14	Keiki	0	0	2.65	F4	POP2	2016-01-09	No
Achatinella	fuscobasis	0	2012	2012-02-10	2012-02-10	2012	3.45	Keiki	0	0	3.57	F4	POP4	2016-02-09	No
Achatinella	fuscobasis	0	2012	2012-02-24	2012-02-24	2012	3.62	Keiki	0	0	2.81	F4	POP4	2016-02-23	No
Achatinella	fuscobasis	0	2012	2012-03-09	2012-03-09	2012	2.94	Keiki	0	0	3.19	F4	POP3	2016-03-08	No
Achatinella	fuscobasis	0	2012	2012-03-09	2012-03-09	2012	3.25	Keiki	0	0	3.43	F4	POP2	2016-03-08	No
Achatinella	fuscobasis	0	2012	2012-03-09	2012-03-09	2012	3.9	Keiki	0	0	3.99	F4	POP2	2016-03-08	No
Achatinella	fuscobasis	0	2012	2012-05-03	2012-05-03	2012	3.01	Keiki	0	0	2.58	F4	POP2	2016-05-02	No
Achatinella	fuscobasis	0	2012	2012-05-03	2012-05-03	2012	3.01	Keiki	0	0	2.02	F4	POP2	2016-05-02	No
Achatinella	fuscobasis	0	2012	2012-05-13	2012-05-13	2012	2.4	Keiki	0	0	1.79	F4	POP2	2016-05-12	No
Achatinella	fuscobasis	0	2012	2012-05-13	2012-05-13	2012	2.79	Keiki	0	0	2.19	F4	POP2	2016-05-12	No
Achatinella	fuscobasis	0	2012	2012-05-16	2012-05-16	2012	2.97	Keiki	0	0	3.39	F4	POP2	2016-05-15	No
Achatinella	fuscobasis	0	2012	2012-05-16	2012-05-16	2012	3	Keiki	0	0	2.97	F4	POP2	2016-05-15	No
Achatinella	fuscobasis	0	2012	2012-05-29	2012-05-29	2012	2.11	Keiki	0	0	1.72	F4	POP2	2016-05-28	No
Achatinella	fuscobasis	0	2012	2012-05-30	2012-05-30	2012	2.88	Keiki	0	0	2.2	F4	POP5	2016-05-29	No
Achatinella	fuscobasis	0	2012	2012-06-14	2012-06-14	2012	3.5	Keiki	0	0	3.35	F4	POP2	2016-06-13	No
Achatinella	fuscobasis	0	2012	2012-06-29	2012-06-29	2012	2.24	Keiki	0	0	1.56	F4	POP3	2016-06-28	No
Achatinella	fuscobasis	0	2012	2012-07-02	2012-07-02	2012	3.21	Keiki	0	0	3.58	F4	POP2	2016-07-01	No
Achatinella	fuscobasis	0	2012	2012-07-12	2012-07-12	2012	2.44	Keiki	0	0	2.24	F4	POP2	2016-07-11	No
Achatinella	fuscobasis	0	2012	2012-07-13	2012-07-13	2012	2.34	Keiki	0	0	2.11	F4	POP2	2016-07-12	No
Achatinella	fuscobasis	0	2012	2012-08-09	2012-04-19 05:38:49	2012	5.9	Keiki	1.9	0.306205	5.67	F4	POP1	2016-04-18 05:38:49	No
Achatinella	fuscobasis	0	2012	2012-08-24	2012-08-24	2012	2.8	Keiki	0	0	3.48	F4	POP2	2016-08-23	No
Achatinella	fuscobasis	0	2012	2012-09-21	2012-09-21	2012	2.32	Keiki	0	0	1.51	F4	POP4	2016-09-20	No
Achatinella	fuscobasis	0	2012	2012-10-18	2012-09-25 01:24:42	2012	4.39	Keiki	0.39	0.0628525	4.07	F4	POP1	2016-09-24 01:24:42	No
Achatinella	fuscobasis	0	2012	2012-10-18	2012-03-13 18:21:10	2012	7.71	Keiki	3.71	0.597905	6.94	F4	POP2	2016-03-12 18:21:10	No
Achatinella	fuscobasis	0	2012	2012-10-19	2012-10-19	2012	2.36	Keiki	0	0	3.04	F4	POP4	2016-10-18	No
Achatinella	fuscobasis	0	2012	2012-10-19	2012-10-19	2012	3.08	Keiki	0	0	2.49	F4	POP4	2016-10-18	No
Achatinella	fuscobasis	0	2012	2012-11-11	2012-11-11	2012	2.79	Keiki	0	0	2.59	F4	POP2	2016-11-10	No
Achatinella	fuscobasis	0	2012	2012-11-11	2012-11-11	2012	2.79	Keiki	0	0	2.59	F4	POP2	2016-11-10	No
Achatinella	fuscobasis	0	2012	2012-11-28	2012-11-28	2012	2.24	Keiki	0	0	1.17	F4	POP2	2016-11-27	No
Achatinella	fuscobasis	0	2012	2012-11-28	2012-11-05 15:31:45	2012	4.38	Keiki	0.38	0.0612409	5.12	F4	POP2	2016-11-04 15:31:45	No
Achatinella	fuscobasis	0	2012	2012-12-13	2012-11-06 12:42:21	2012	4.62	Keiki	0.62	0.0999194	4.3	F4	POP1	2016-11-05 12:42:21	No
Achatinella	fuscobasis	0	2012	2012-12-13	2012-08-12 15:31:45	2012	6.08	Keiki	2.08	0.335214	5.39	F4	POP1	2016-08-11 15:31:45	No
Achatinella	fuscobasis	0	2012	2012-12-13	2012-07-30 16:56:28	2012	6.3	Keiki	2.3	0.370669	5.57	F4	POP1	2016-07-29 16:56:28	No
Achatinella	fuscobasis	0	2012	2012-12-26	2012-12-26	2012	3.26	Keiki	0	0	3.25	F4	POP1	2016-12-25	No
Achatinella	fuscobasis	0	2012	2012-12-26	2012-12-26	2012	3.86	Keiki	0	0	3.58	F4	POP1	2016-12-25	No
Achatinella	fuscobasis	0	2012	2012-12-26	2012-01-09 19:45:52	2012	9.97	Keiki	5.97	0.962127	7.81	F4	POP2	2016-01-08 19:45:52	No
Achatinella	fuscobasis	0	2012	2012-12-27	2012-12-19 22:35:17	2012	4.12	Keiki	0.12	0.0193392	3.67	F4	POP5	2016-12-18 22:35:17	No
Achatinella	fuscobasis	0	2012	2012-12-27	2012-12-19 08:28:14	2012	4.13	Keiki	0.13	0.0209508	3.8	F4	POP5	2016-12-18 08:28:14	No
Achatinella	fuscobasis	0	2012	2012-12-27	2012-09-06 19:45:52	2012	5.89	Keiki	1.89	0.304593	5.45	F4	POP4	2016-09-05 19:45:52	No
Achatinella	fuscobasis	0	2013	2013-01-09	2012-06-14 18:21:10	2012	7.54	Keiki	3.54	0.570508	6.91	F4	POP2	2016-06-13 18:21:10	No
Achatinella	fuscobasis	0	2013	2013-01-09	2012-02-01 01:24:42	2012	9.83	Keiki	5.83	0.939565	8.6	F4	POP2	2016-01-31 01:24:42	No
Achatinella	fuscobasis	0	2013	2013-04-03	2012-11-18 02:49:24	2012	6.31	Keiki	2.31	0.37228	4.86	F4	NONE	2016-11-17 02:49:24	No
Achatinella	fuscobasis	0	2013	2013-05-16	2012-06-27 15:31:45	2012	9.48	Keiki	5.48	0.883159	7.67	F4	POP3	2016-06-26 15:31:45	No
Achatinella	fuscobasis	0	2013	2013-07-24	2012-12-05 09:52:56	2012	7.92	Keiki	3.92	0.631749	7.13	F4	POP1	2016-12-04 09:52:56	No
Achatinella	fuscobasis	0	2013	2013-09-05	2012-09-21 04:14:07	2012	9.93	Keiki	5.93	0.955681	8.08	F4	POP1	2016-09-20 04:14:07	No
Achatinella	fuscobasis	0	2013	2013-09-05	2012-09-18 05:38:49	2012	9.98	Keiki	5.98	0.963739	7.89	F4	POP1	2016-09-17 05:38:49	No
Achatinella	fuscobasis	0	2013	2013-09-05	2012-05-02	2012	10.63	NonKeiki	0.63	1.34521	8.58	F4	POP1	2016-05-01	No
Achatinella	fuscobasis	0	2013	2013-11-27	2012-04-27	2012	11.07	NonKeiki	1.07	1.5863	8.65	F4	POP2	2016-04-26	No
Achatinella	fuscobasis	0	2013	2013-12-31	2012-11-19	2012	10.21	NonKeiki	0.21	1.11507	8.28	F4	POP1	2016-11-18	No
Achatinella	fuscobasis	0	2014	2014-03-11	2012-05-23	2012	11.46	NonKeiki	1.46	1.8	9.32	F4	POP1	2016-05-22	No
Achatinella	fuscobasis	48 AFC	2014	2014-06-11	2012-11-03	2012	11.1	NonKeiki	1.1	1.60274		F4		2016-11-02	No
Achatinella	fuscobasis	98 AFC	2014	2014-06-11	2012-10-14	2012	11.2	NonKeiki	1.2	1.65753		F4		2016-10-13	No
Achatinella	fuscobasis	64 AFC	2014	2014-06-11	2012-08-15	2012	11.5	NonKeiki	1.5	1.82192		F4		2016-08-14	No
Achatinella	fuscobasis	66 AFC	2014	2014-06-11	2012-08-15	2012	11.5	NonKeiki	1.5	1.82192		F4		2016-08-14	No
Achatinella	fuscobasis	52 AFC	2014	2014-06-11	2012-07-26	2012	11.6	NonKeiki	1.6	1.87671		F4		2016-07-25	No
Achatinella	fuscobasis	94 AFC	2014	2014-06-11	2012-07-26	2012	11.6	NonKeiki	1.6	1.87671		F4		2016-07-25	No
Achatinella	fuscobasis	81 AFC	2014	2014-06-11	2012-03-28	2012	12.2	NonKeiki	2.2	2.20548		F4		2016-03-27	No
Achatinella	fuscobasis	93 AFC	2014	2014-06-11	2012-03-28	2012	12.2	NonKeiki	2.2	2.20548		F4		2016-03-27	No
Achatinella	fuscobasis	51 AFC	2014	2014-06-11	2012-01-28	2012	12.5	NonKeiki	2.5	2.36986		F4		2016-01-27	No
Achatinella	fuscobasis	116 AFC	2014	2014-06-11	2012-01-28	2012	12.5	NonKeiki	2.5	2.36986		F4		2016-01-27	No
Achatinella	fuscobasis	119 AFC	2014	2014-06-11	2012-01-28	2012	12.5	NonKeiki	2.5	2.36986		F4		2016-01-27	No
Achatinella	fuscobasis	0	2013	2013-02-20	2013-02-20	2013	3.23	Keiki	0	0	3.3	F4	POP1	2017-02-19	No
Achatinella	fuscobasis	0	2013	2013-02-21	2013-02-21	2013	3.45	Keiki	0	0	3.06	F4	POP5	2017-02-20	No
Achatinella	fuscobasis	0	2013	2013-02-21	2013-01-22	2013	4.51	Keiki	0.51	0.0821918	4.47	F4	POP5	2017-01-21	No
Achatinella	fuscobasis	0	2013	2013-03-07	2013-03-07	2013	3.64	Keiki	0	0	3.46	F4	POP4	2017-03-06	No
Achatinella	fuscobasis	0	2013	2013-05-05	2013-05-05	2013	3.14	Keiki	0	0	2.7	F4	POP3	2017-05-04	No
Achatinella	fuscobasis	0	2013	2013-07-15	2013-07-15	2013	2.6	Keiki	0	0	3.27	F4	POP4	2017-07-14	No
Achatinella	fuscobasis	0	2013	2013-08-01	2013-05-13 14:07:03	2013	5.35	Keiki	1.35	0.217566	3.42	F4	POP1	2017-05-12 14:07:03	No
Achatinella	fuscobasis	0	2013	2013-08-21	2013-08-21	2013	3.4	Keiki	0	0	3.57	F4	POP3	2017-08-20	No
Achatinella	fuscobasis	0	2013	2013-08-21	2013-08-21	2013	3.57	Keiki	0	0	3.72	F4	POP3	2017-08-20	No
Achatinella	fuscobasis	0	2013	2013-08-21	2013-02-10 05:38:49	2013	7.26	Keiki	3.26	0.525383	6.26	F4	POP2	2017-02-09 05:38:49	No
Achatinella	fuscobasis	0	2013	2013-09-20	2013-09-20	2013	3.39	Keiki	0	0	3.36	F4	POP3	2017-09-19	No
Achatinella	fuscobasis	0	2013	2013-09-20	2013-09-20	2013	3.4	Keiki	0	0	2.82	F4	POP3	2017-09-19	No
Achatinella	fuscobasis	0	2013	2013-09-20	2013-08-31 14:07:03	2013	4.33	Keiki	0.33	0.0531829	3.93	F4	POP3	2017-08-30 14:07:03	No
Achatinella	fuscobasis	0	2013	2013-10-03	2013-08-12 05:38:49	2013	4.88	Keiki	0.88	0.141821	4.25	F4	POP2	2017-08-11 05:38:49	No
Achatinella	fuscobasis	0	2013	2013-10-18	2013-05-27 11:17:38	2013	6.44	Keiki	2.44	0.393231	4.91	F4	POP1	2017-05-26 11:17:38	No
Achatinella	fuscobasis	0	2013	2013-11-10	2013-10-05 02:49:24	2013	4.61	Keiki	0.61	0.0983078	4.07	F4	POP5	2017-10-04 02:49:24	No
Achatinella	fuscobasis	0	2013	2013-11-14	2013-11-14	2013	3.91	Keiki	0	0	3.5	F4	POP4	2017-11-13	No
Achatinella	fuscobasis	0	2013	2013-11-14	2013-09-30 07:03:31	2013	4.76	Keiki	0.76	0.122482	3.41	F4	POP4	2017-09-29 07:03:31	No
Achatinella	fuscobasis	0	2013	2013-11-21	2013-11-21	2013	3.37	Keiki	0	0	2.08	F4	POP3	2017-11-20	No
Achatinella	fuscobasis	0	2013	2013-11-26	2013-11-26	2013	3.55	Keiki	0	0	3	F4	POP4	2017-11-25	No
Achatinella	fuscobasis	0	2013	2013-12-31	2013-06-21 01:24:42	2013	7.28	Keiki	3.28	0.528606	6.1	F4	POP1	2017-06-20 01:24:42	No
Achatinella	fuscobasis	0	2014	2014-01-03	2013-12-21 15:31:45	2013	4.21	Keiki	0.21	0.0338437	3.34	F4	POP2	2017-12-20 15:31:45	No
Achatinella	fuscobasis	0	2014	2014-01-03	2013-12-18 02:49:24	2013	4.27	Keiki	0.27	0.0435133	3.61	F4	POP2	2017-12-17 02:49:24	No
Achatinella	fuscobasis	0	2014	2014-01-03	2013-12-09 21:10:35	2013	4.41	Keiki	0.41	0.0660757	3.67	F4	POP4	2017-12-08 21:10:35	No
Achatinella	fuscobasis	0	2014	2014-01-03	2013-12-01 15:31:45	2013	4.55	Keiki	0.55	0.0886382	3.87	F4	POP4	2017-11-30 15:31:45	No
Achatinella	fuscobasis	0	2014	2014-01-03	2013-09-06 18:21:10	2013	6.01	Keiki	2.01	0.323932	5.02	F4	POP4	2017-09-05 18:21:10	No
Achatinella	fuscobasis	0	2014	2014-01-03	2013-07-09 22:35:17	2013	7.01	Keiki	3.01	0.485093	6.03	F4	POP2	2017-07-08 22:35:17	No
Achatinella	fuscobasis	0	2014	2014-01-03	2013-06-18 18:21:10	2013	7.37	Keiki	3.37	0.54311	6.79	F4	POP4	2017-06-17 18:21:10	No
Achatinella	fuscobasis	0	2014	2014-01-03	2013-03-23 02:49:24	2013	8.86	Keiki	4.86	0.783239	6.8	F4	POP4	2017-03-22 02:49:24	No
Achatinella	fuscobasis	0	2014	2014-01-03	2013-02-01 02:49:24	2013	9.71	Keiki	5.71	0.920226	8.27	F4	POP2	2017-01-31 02:49:24	No
Achatinella	fuscobasis	0	2014	2014-01-27	2013-04-22 14:07:03	2013	8.75	Keiki	4.75	0.765512	6.96	F4	POP2	2017-04-21 14:07:03	No
Achatinella	fuscobasis	33 AFC	2014	2014-06-11	2013-12-22 09:52:56	2013	6.9	Keiki	2.9	0.467365		F4		2017-12-21 09:52:56	No
Achatinella	fuscobasis	29 AFC	2014	2014-06-11	2013-12-04 18:21:10	2013	7.2	Keiki	3.2	0.515713		F4		2017-12-03 18:21:10	No
Achatinella	fuscobasis	42 AFC	2014	2014-06-11	2013-11-23	2013	7.4	Keiki	3.4	0.547945		F4		2017-11-22	No
Achatinella	fuscobasis	4 AFC	2014	2014-06-11	2013-11-05 08:28:14	2013	7.7	Keiki	3.7	0.596293		F4		2017-11-04 08:28:14	No
Achatinella	fuscobasis	5 AFC	2014	2014-06-11	2013-11-05 08:28:14	2013	7.7	Keiki	3.7	0.596293		F4		2017-11-04 08:28:14	No
Achatinella	fuscobasis	72 AFC	2014	2014-06-11	2013-11-05 08:28:14	2013	7.7	Keiki	3.7	0.596293		F4		2017-11-04 08:28:14	No
Achatinella	fuscobasis	10 AFC	2014	2014-06-11	2013-10-12 19:45:52	2013	8.1	Keiki	4.1	0.660757		F4		2017-10-11 19:45:52	No
Achatinella	fuscobasis	11 AFC	2014	2014-06-11	2013-10-12 19:45:52	2013	8.1	Keiki	4.1	0.660757		F4		2017-10-11 19:45:52	No
Achatinella	fuscobasis	38 AFC	2014	2014-06-11	2013-10-06 22:35:17	2013	8.2	Keiki	4.2	0.676873		F4		2017-10-05 22:35:17	No
Achatinella	fuscobasis	74 AFC	2014	2014-06-11	2013-10-06 22:35:17	2013	8.2	Keiki	4.2	0.676873		F4		2017-10-05 22:35:17	No
Achatinella	fuscobasis	37 AFC	2014	2014-06-11	2013-09-25 04:14:07	2013	8.4	Keiki	4.4	0.709106		F4		2017-09-24 04:14:07	No
Achatinella	fuscobasis	14 AFC	2014	2014-06-11	2013-09-19 07:03:31	2013	8.5	Keiki	4.5	0.725222		F4		2017-09-18 07:03:31	No
Achatinella	fuscobasis	40 AFC	2014	2014-06-11	2013-09-19 07:03:31	2013	8.5	Keiki	4.5	0.725222		F4		2017-09-18 07:03:31	No
Achatinella	fuscobasis	13 AFC	2014	2014-06-11	2013-08-15	2013	9.1	Keiki	5.1	0.821918		F4		2017-08-14	No
Achatinella	fuscobasis	59 AFC	2014	2014-06-11	2013-08-15	2013	9.1	Keiki	5.1	0.821918		F4		2017-08-14	No
Achatinella	fuscobasis	63 AFC	2014	2014-06-11	2013-08-15	2013	9.1	Keiki	5.1	0.821918		F4		2017-08-14	No
Achatinella	fuscobasis	71 AFC	2014	2014-06-11	2013-08-15	2013	9.1	Keiki	5.1	0.821918		F4		2017-08-14	No
Achatinella	fuscobasis	97 AFC	2014	2014-06-11	2013-08-15	2013	9.1	Keiki	5.1	0.821918		F4		2017-08-14	No
Achatinella	fuscobasis	34 AFC	2014	2014-06-11	2013-08-09 02:49:24	2013	9.2	Keiki	5.2	0.838034		F4		2017-08-08 02:49:24	No
Achatinella	fuscobasis	50 AFC	2014	2014-06-11	2013-08-09 02:49:24	2013	9.2	Keiki	5.2	0.838034		F4		2017-08-08 02:49:24	No
Achatinella	fuscobasis	75 AFC	2014	2014-06-11	2013-08-09 02:49:24	2013	9.2	Keiki	5.2	0.838034		F4		2017-08-08 02:49:24	No
Achatinella	fuscobasis	91 AFC	2014	2014-06-11	2013-08-09 02:49:24	2013	9.2	Keiki	5.2	0.838034		F4		2017-08-08 02:49:24	No
Achatinella	fuscobasis	17 AFC	2014	2014-06-11	2013-08-03 05:38:49	2013	9.3	Keiki	5.3	0.85415		F4		2017-08-02 05:38:49	No
Achatinella	fuscobasis	9 AFC	2014	2014-06-11	2013-07-22 11:17:38	2013	9.5	Keiki	5.5	0.886382		F4		2017-07-21 11:17:38	No
Achatinella	fuscobasis	57 AFC	2014	2014-06-11	2013-07-22 11:17:38	2013	9.5	Keiki	5.5	0.886382		F4		2017-07-21 11:17:38	No
Achatinella	fuscobasis	7 AFC	2014	2014-06-11	2013-07-10 16:56:28	2013	9.7	Keiki	5.7	0.918614		F4		2017-07-09 16:56:28	No
Achatinella	fuscobasis	44 AFC	2014	2014-06-11	2013-07-10 16:56:28	2013	9.7	Keiki	5.7	0.918614		F4		2017-07-09 16:56:28	No
Achatinella	fuscobasis	18 AFC	2014	2014-06-11	2013-06-28 22:35:17	2013	9.9	Keiki	5.9	0.950846		F4		2017-06-27 22:35:17	No
Achatinella	fuscobasis	99 AFC	2014	2014-06-11	2013-06-28 22:35:17	2013	9.9	Keiki	5.9	0.950846		F4		2017-06-27 22:35:17	No
Achatinella	fuscobasis	12 AFC	2014	2014-06-11	2013-06-11	2013	10	NonKeiki	0	1		F4		2017-06-10	No
Achatinella	fuscobasis	60 AFC	2014	2014-06-11	2013-06-11	2013	10	NonKeiki	0	1		F4		2017-06-10	No
Achatinella	fuscobasis	70 AFC	2014	2014-06-11	2013-05-22	2013	10.1	NonKeiki	0.1	1.05479		F4		2017-05-21	No
Achatinella	fuscobasis	102 AFC	2014	2014-06-11	2013-05-22	2013	10.1	NonKeiki	0.1	1.05479		F4		2017-05-21	No
Achatinella	fuscobasis	39 AFC	2014	2014-06-11	2013-05-02	2013	10.2	NonKeiki	0.2	1.10959		F4		2017-05-01	No
Achatinella	fuscobasis	65 AFC	2014	2014-06-11	2013-05-02	2013	10.2	NonKeiki	0.2	1.10959		F4		2017-05-01	No
Achatinella	fuscobasis	6 AFC	2014	2014-06-11	2013-03-03	2013	10.5	NonKeiki	0.5	1.27397		F4		2017-03-02	No
Achatinella	fuscobasis	55 AFC	2014	2014-06-11	2013-03-03	2013	10.5	NonKeiki	0.5	1.27397		F4		2017-03-02	No
Achatinella	fuscobasis	62 AFC	2014	2014-06-11	2013-03-03	2013	10.5	NonKeiki	0.5	1.27397		F4		2017-03-02	No
Achatinella	fuscobasis	73 AFC	2014	2014-06-11	2013-03-03	2013	10.5	NonKeiki	0.5	1.27397		F4		2017-03-02	No
Achatinella	fuscobasis	78 AFC	2014	2014-06-11	2013-03-03	2013	10.5	NonKeiki	0.5	1.27397		F4		2017-03-02	No
Achatinella	fuscobasis	92 AFC	2014	2014-06-11	2013-02-11	2013	10.6	NonKeiki	0.6	1.32877		F4		2017-02-10	No
Achatinella	fuscobasis	8 AFC	2014	2014-06-11	2013-01-22	2013	10.7	NonKeiki	0.7	1.38356		F4		2017-01-21	No
Achatinella	fuscobasis	0	2014	2014-01-03	2014-01-03	2014	3.32	Keiki	0	0	2.87	F4	POP4	2018-01-02	No
Achatinella	fuscobasis	0	2014	2014-01-03	2014-01-03	2014	3.59	Keiki	0	0	3.01	F4	POP2	2018-01-02	No
Achatinella	fuscobasis	0	2014	2014-01-03	2014-01-03	2014	3.65	Keiki	0	0	3.03	F4	POP2	2018-01-02	No
Achatinella	fuscobasis	0	2014	2014-01-27	2014-01-27	2014	2.24	Keiki	0	0	2.34	F4	POP3	2018-01-26	No
Achatinella	fuscobasis	0	2014	2014-01-27	2014-01-27	2014	2.37	Keiki	0	0	1.66	F4	POP3	2018-01-26	No
Achatinella	fuscobasis	0	2014	2014-01-27	2014-01-27	2014	3.63	Keiki	0	0	3.19	F4	POP3	2018-01-26	No
Achatinella	fuscobasis	0	2014	2014-02-13	2014-02-13	2014	2.8	Keiki	0	0	2.63	F4	POP3	2018-02-12	No
Achatinella	fuscobasis	0	2014	2014-02-27	2014-02-27	2014	3.2	Keiki	0	0	2.8	F4	POP3	2018-02-26	No
Achatinella	fuscobasis	0	2014	2014-03-27	2014-03-27	2014	2.67	Keiki	0	0	2.45	F4	POP3	2018-03-26	No
Achatinella	fuscobasis	16 AFC	2014	2014-06-11	2014-06-11	2014	2.8	Keiki	0	0		F4		2018-06-10	No
Achatinella	fuscobasis	96 AFC	2014	2014-06-11	2014-06-11	2014	3.4	Keiki	0	0		F4		2018-06-10	No
Achatinella	fuscobasis	32 AFC	2014	2014-06-11	2014-06-11	2014	3.6	Keiki	0	0		F4		2018-06-10	No
Achatinella	fuscobasis	1 AFC	2014	2014-06-11	2014-06-11	2014	4	Keiki	0	0		F4		2018-06-10	No
Achatinella	fuscobasis	19 AFC	2014	2014-06-11	2014-06-11	2014	4	Keiki	0	0		F4		2018-06-10	No
Achatinella	fuscobasis	35 AFC	2014	2014-06-11	2014-05-30 05:38:49	2014	4.2	Keiki	0.2	0.0322321		F4		2018-05-29 05:38:49	No
Achatinella	fuscobasis	15 AFC	2014	2014-06-11	2014-05-18 11:17:38	2014	4.4	Keiki	0.4	0.0644641		F4		2018-05-17 11:17:38	No
Achatinella	fuscobasis	95 AFC	2014	2014-06-11	2014-05-12 14:07:03	2014	4.5	Keiki	0.5	0.0805802		F4		2018-05-11 14:07:03	No
Achatinella	fuscobasis	41 AFC	2014	2014-06-11	2014-05-06 16:56:28	2014	4.6	Keiki	0.6	0.0966962		F4		2018-05-05 16:56:28	No
Achatinella	fuscobasis	2 AFC	2014	2014-06-11	2014-04-30 19:45:52	2014	4.7	Keiki	0.7	0.112812		F4		2018-04-29 19:45:52	No
Achatinella	fuscobasis	31 AFC	2014	2014-06-11	2014-03-26 12:42:21	2014	5.3	Keiki	1.3	0.209508		F4		2018-03-25 12:42:21	No
Achatinella	fuscobasis	43 AFC	2014	2014-06-11	2014-03-26 12:42:21	2014	5.3	Keiki	1.3	0.209508		F4		2018-03-25 12:42:21	No
Achatinella	fuscobasis	30 AFC	2014	2014-06-11	2014-03-08 21:10:35	2014	5.6	Keiki	1.6	0.257857		F4		2018-03-07 21:10:35	No
Achatinella	fuscobasis	3 AFC	2014	2014-06-11	2014-02-13 08:28:14	2014	6	Keiki	2	0.322321		F4		2018-02-12 08:28:14	No
Achatinella	fuscobasis	36 AFC	2014	2014-06-11	2014-02-13 08:28:14	2014	6	Keiki	2	0.322321		F4		2018-02-12 08:28:14	No
