# Supplementary material for: Demographic and genetic factors in the recovery or demise of ex situ populations following a severe bottleneck in fifteen species of Hawaiian tree snails
Source: PeerJ. 2015 Nov 12;3:e1406. doi: 10.7717/peerj.1406 (PMC4647602; doi:10.7717/peerj.1406)
Supplement: Supplemental Information 6 [file peerj-03-1406-s010.xls]

## Sheet: Sheet1
	SPECIES	YEAR	DATE COLLECTED	BIRTHDATE	BIRTHYEAR	LENGTH	Age Class	Calc1	Age_Calc	WIDTH	CAGE	MatureDate	Mature?	Generation
Achatinella	lila	1998	1998-12-22	1993-07-18 09:36:00	1993	17	NonKeiki	2.01	5.43178	11		1997-07-17 09:36:00	Mature	FOUNDER
Achatinella	lila	2001	2001-01-18	1995-08-15 09:36:00	1995	17	NonKeiki	2.01	5.43178	9.96		1999-08-14 09:36:00	Mature	FOUNDER
Achatinella	lila	2001	2001-09-13	1996-11-29 09:36:00	1996	16.1	NonKeiki	1.11	4.79068	10.95		2000-11-28 09:36:00	Mature	FOUNDER
Achatinella	lila	2001	2001-09-27	1995-05-11	1995	18.34	NonKeiki	3.35	6.3863	10.45	Adults	1999-05-10	Mature	FOUNDER
Achatinella	lila	2002	2002-01-04	1997-06-08 09:36:00	1997	15.8	NonKeiki	0.81	4.57699	10.15	Adults	2001-06-07 09:36:00	Mature	FOUNDER
Achatinella	lila	2002	2002-03-19	1996-02-19 19:12:00	1996	17.91	NonKeiki	2.92	6.08	10.3	Adults	2000-02-18 19:12:00	Mature	FOUNDER
Achatinella	lila	2002	2002-06-19	1997-09-22 14:24:00	1997	16.03	NonKeiki	1.04	4.74082	10.04	Adults	2001-09-21 14:24:00	Mature	F1
Achatinella	lila	2003	2003-09-23	1997-12-10 09:36:00	1997	17.5	NonKeiki	2.51	5.78795	10.9	keiki 2	2001-12-09 09:36:00	Mature	F1
Achatinella	lila	2003	2003-09-24	1999-08-01 09:36:00	1999	15.2	NonKeiki	0.21	4.14959	11.35	keiki 3	2003-07-31 09:36:00	Mature	F1
Achatinella	lila	2004	2004-01-28	1998-10-18	1998	16.79	NonKeiki	1.8	5.28219	9.95	keiki 1	2002-10-17	Mature	F1
Achatinella	lila	2004	2004-01-30	1998-06-09 09:36:00	1998	17.3	NonKeiki	2.31	5.64548	11.56	Adults	2002-06-08 09:36:00	Mature	F1
Achatinella	lila	2004	2004-02-09	1999-08-09 09:36:00	1999	15.7	NonKeiki	0.71	4.50575	9.93	Adults	2003-08-08 09:36:00	Mature	F1
Achatinella	lila	2004	2004-02-10	1997-10-29 09:36:00	1997	18.2	NonKeiki	3.21	6.28658	9.8	Adults	2001-10-28 09:36:00	Mature	F1
Achatinella	lila	2004	2004-03-25	1999-03-04 14:24:00	1999	16.48	NonKeiki	1.49	5.06137	9.4	keiki 3	2003-03-03 14:24:00	Mature	F1
Achatinella	lila	2004	2004-04-06	1999-10-05 09:36:00	1999	15.7	NonKeiki	0.71	4.50575	10.1	Adults	2003-10-04 09:36:00	Mature	F1
Achatinella	lila	2004	2004-04-21	1997-11-14 19:12:00	1997	18.41	NonKeiki	3.42	6.43616	11	Adults	2001-11-13 19:12:00	Mature	F1
Achatinella	lila	2004	2004-04-21	1997-12-13 09:36:00	1997	18.3	NonKeiki	3.31	6.35781	11.21	Adults	2001-12-12 09:36:00	Mature	F1
Achatinella	lila	2004	2004-04-23	1999-03-15 09:36:00	1999	16.55	NonKeiki	1.56	5.11123	10.84	keiki 2	2003-03-14 09:36:00	Mature	F1
Achatinella	lila	2004	2004-06-15	1998-09-28 09:36:00	1998	17.4	NonKeiki	2.41	5.71671	10.7	keiki 2	2002-09-27 09:36:00	Mature	F1
Achatinella	lila	2004	2004-11-03	1999-11-03 09:36:00	1999	16.4	NonKeiki	1.41	5.00438	9.93	Adults	2003-11-02 09:36:00	Mature	F1
Achatinella	lila	2004	2004-12-03	1999-05-04 04:48:00	1999	17.22	NonKeiki	2.23	5.58849	9.7	keiki 2	2003-05-03 04:48:00	Mature	F1
Achatinella	lila	2004	2004-12-16	1998-09-07	1998	18.19	NonKeiki	3.2	6.27945	9.55	Adults	2002-09-06	Mature	F1
Achatinella	lila	2005	2005-03-11	2000-05-01 09:36:00	2000	16.2	NonKeiki	1.21	4.86192	10.68	keiki	2004-04-30 09:36:00	Mature	F1
Achatinella	lila	2005	2005-03-24	1999-06-01	1999	17.54	NonKeiki	2.55	5.81644	10.7	Adults	2003-05-31	Mature	F1
Achatinella	lila	2005	2005-04-06	1999-12-10 09:36:00	1999	16.85	NonKeiki	1.86	5.32493	10.21	Adults	2003-12-09 09:36:00	Mature	F1
Achatinella	lila	2005	2005-04-07	2000-03-21 19:12:00	2000	16.46	NonKeiki	1.47	5.04712	10.15	keiki 2	2004-03-20 19:12:00	Mature	F1
Achatinella	lila	2005	2005-04-07	2000-10-21	2000	15.64	NonKeiki	0.65	4.46301	9.74	keiki 2	2004-10-20	Mature	F1
Achatinella	lila	2005	2005-05-20	2000-04-02 14:24:00	2000	16.58	NonKeiki	1.59	5.1326	12.64	keiki 2	2004-04-01 14:24:00	Mature	F1
Achatinella	lila	2005	2005-05-20	2000-06-09 04:48:00	2000	16.32	NonKeiki	1.33	4.9474	9.82	keiki 2	2004-06-08 04:48:00	Mature	F1
Achatinella	lila	2005	2005-07-13	2000-02-15 04:48:00	2000	16.97	NonKeiki	1.98	5.41041	10.08	Adults	2004-02-14 04:48:00	Mature	F1
Achatinella	lila	2005	2005-08-23	1999-09-29 19:12:00	1999	17.66	NonKeiki	2.67	5.90192	10.56	Adults	2003-09-28 19:12:00	Mature	F1
Achatinella	lila	2005	2005-09-22	1999-10-16 19:12:00	1999	17.71	NonKeiki	2.72	5.93753	10.2	Adults	2003-10-15 19:12:00	Mature	F1
Achatinella	lila	2005	2005-09-22	2000-02-13 09:36:00	2000	17.25	NonKeiki	2.26	5.60986	9.35	Adults	2004-02-12 09:36:00	Mature	F1
Achatinella	lila	2005	2005-11-03	2000-06-12 09:36:00	2000	16.95	NonKeiki	1.96	5.39616	9.85	Adults	2004-06-11 09:36:00	Mature	F1
Achatinella	lila	2005	2005-11-04	2001-08-29 09:36:00	2001	15.25	NonKeiki	0.26	4.18521	8.82	keiki 2	2005-08-28 09:36:00	Mature	F1
Achatinella	lila	2005	2005-11-18	2001-02-19	2001	16.04	NonKeiki	1.05	4.74795	9.8	keiki 4	2005-02-18	Mature	F1
Achatinella	lila	2006	2006-01-02	1999-07-08	1999	18.49	NonKeiki	3.5	6.49315	10.95	keiki 2	2003-07-07	Mature	F1
Achatinella	lila	2006	2006-01-02	2001-09-21	2001	15.39	NonKeiki	0.4	4.28493	9.91	keiki 2	2005-09-20	Mature	F1
Achatinella	lila	2006	2006-01-27	1999-08-25 09:36:00	1999	18.4	NonKeiki	3.41	6.42904	9.4	Adults	2003-08-24 09:36:00	Mature	F1
Achatinella	lila	2006	2006-01-27	2000-04-02 09:36:00	2000	17.55	NonKeiki	2.56	5.82356	9.55	Adults	2004-04-01 09:36:00	Mature	F1
Achatinella	lila	2006	2006-01-27	2000-04-07 14:24:00	2000	17.53	NonKeiki	2.54	5.80932	9.38	Adults	2004-04-06 14:24:00	Mature	F1
Achatinella	lila	2006	2006-02-02	2000-08-16 09:36:00	2000	17.05	NonKeiki	2.06	5.4674	9.15	keiki 2	2004-08-15 09:36:00	Mature	F1
Achatinella	lila	2006	2006-02-27	2002-02-25 09:36:00	2002	15	NonKeiki	0.01	4.00712	9.2	keiki 2	2006-02-24 09:36:00	Mature	F1
Achatinella	lila	2006	2006-03-09	1999-11-16	1999	18.24	NonKeiki	3.25	6.31507	10.37	Adults	2003-11-15	Mature	F1
Achatinella	lila	2006	2006-04-10	2002-04-08 09:36:00	2002	15	NonKeiki	0.01	4.00712	9.1	keiki 2	2006-04-07 09:36:00	Mature	F1
Achatinella	lila	2006	2006-04-12	2001-08-06 09:36:00	2001	15.95	NonKeiki	0.96	4.68384	9.4	keiki 4	2005-08-05 09:36:00	Mature	F1
Achatinella	lila	2006	2006-04-25	1999-11-18 19:12:00	1999	18.41	NonKeiki	3.42	6.43616	10.05	Adults	2003-11-17 19:12:00	Mature	F1
Achatinella	lila	2006	2006-06-14	2001-11-16 09:36:00	2001	15.8	NonKeiki	0.81	4.57699	9.7	keiki	2005-11-15 09:36:00	Mature	F1
Achatinella	lila	2006	2006-07-26	2000-08-21 09:36:00	2000	17.7	NonKeiki	2.71	5.93041	9.7	Adults	2004-08-20 09:36:00	Mature	F1
Achatinella	lila	2006	2006-07-28	2002-04-13 09:36:00	2002	15.4	NonKeiki	0.41	4.29205	9.9	keiki 5	2006-04-12 09:36:00	Mature	F1
Achatinella	lila	2006	2006-08-27	2002-02-24 09:36:00	2002	15.7	NonKeiki	0.71	4.50575	9.3	keiki 2	2006-02-23 09:36:00	Mature	F1
Achatinella	lila	2006	2006-08-28	2002-05-01 09:36:00	2002	15.45	NonKeiki	0.46	4.32767	10.85	keiki 2	2006-04-30 09:36:00	Mature	F1
Achatinella	lila	2006	2006-09-08	2001-09-07 09:36:00	2001	16.4	NonKeiki	1.41	5.00438	10.05	keiki 2	2005-09-06 09:36:00	Mature	F1
Achatinella	lila	2006	2006-10-23	2002-04-22 09:36:00	2002	15.7	NonKeiki	0.71	4.50575	10.5	keiki 2	2006-04-21 09:36:00	Mature	F1
Achatinella	lila	2006	2006-10-31	2002-02-03 14:24:00	2002	16.03	NonKeiki	1.04	4.74082	10.7	keiki 3	2006-02-02 14:24:00	Mature	F1
Achatinella	lila	2006	2006-11-06	2001-10-10 09:36:00	2001	16.5	NonKeiki	1.51	5.07562	9.7	keiki 2	2005-10-09 09:36:00	Mature	F1
Achatinella	lila	2006	2006-12-14	2002-08-04 09:36:00	2002	15.5	NonKeiki	0.51	4.36329	9.98	Adults	2006-08-03 09:36:00	Mature	F1
Achatinella	lila	2006	2006-12-18	2001-06-13 04:48:00	2001	17.12	NonKeiki	2.13	5.51726	10.38	keiki 2	2005-06-12 04:48:00	Mature	F1
Achatinella	lila	2007	2007-01-11	2002-01-07 19:12:00	2002	16.41	NonKeiki	1.42	5.01151	10.76	Adults	2006-01-06 19:12:00	Mature	F1
Achatinella	lila	2007	2007-01-11	2002-02-18 09:36:00	2002	16.25	NonKeiki	1.26	4.89753	11.5	keiki 5	2006-02-17 09:36:00	Mature	F1
Achatinella	lila	2007	2007-01-16	2001-05-23 19:12:00	2001	17.31	NonKeiki	2.32	5.6526	10.69	keiki 2	2005-05-22 19:12:00	Mature	F1
Achatinella	lila	2007	2007-01-21	2001-11-29 09:36:00	2001	16.6	NonKeiki	1.61	5.14685	9.93	keiki 3	2005-11-28 09:36:00	Mature	F1
Achatinella	lila	2007	2007-01-24	2001-10-11 09:36:00	2001	16.8	NonKeiki	1.81	5.28932	9.64	keiki 3	2005-10-10 09:36:00	Mature	F1
Achatinella	lila	2007	2007-01-29	2001-04-27 19:12:00	2001	17.46	NonKeiki	2.47	5.75945	11.06	keiki 2	2005-04-26 19:12:00	Mature	F1
Achatinella	lila	2007	2007-01-29	2002-05-17 14:24:00	2002	15.98	NonKeiki	0.99	4.70521	10.66	keiki 2	2006-05-16 14:24:00	Mature	F1
Achatinella	lila	2007	2007-01-31	2002-06-12	2002	15.89	NonKeiki	0.9	4.6411	9.93	keiki 4	2006-06-11	Mature	F1
Achatinella	lila	2007	2007-02-05	2001-07-24 09:36:00	2001	17.15	NonKeiki	2.16	5.53863	12.1	keiki 3	2005-07-23 09:36:00	Mature	F1
Achatinella	lila	2007	2007-02-09	2002-04-27 09:36:00	2002	16.1	NonKeiki	1.11	4.79068	10.85	keiki 5	2006-04-26 09:36:00	Mature	F1
Achatinella	lila	2007	2007-02-14	2002-09-12	2002	15.59	NonKeiki	0.6	4.4274	9.23	keiki 4	2006-09-11	Mature	F1
Achatinella	lila	2007	2007-02-21	2001-09-12 04:48:00	2001	17.02	NonKeiki	2.03	5.44603	12.41	keiki 3	2005-09-11 04:48:00	Mature	F1
Achatinella	lila	2007	2007-02-21	2001-12-14 19:12:00	2001	16.66	NonKeiki	1.67	5.18959	9.56	keiki 3	2005-12-13 19:12:00	Mature	F1
Achatinella	lila	2007	2007-02-21	2002-01-30 14:24:00	2002	16.48	NonKeiki	1.49	5.06137	9.96	keiki 3	2006-01-29 14:24:00	Mature	F1
Achatinella	lila	2007	2007-02-21	2002-03-10 14:24:00	2002	16.33	NonKeiki	1.34	4.95452	12.49	keiki 3	2006-03-09 14:24:00	Mature	F1
Achatinella	lila	2007	2007-02-21	2002-05-12	2002	16.09	NonKeiki	1.1	4.78356	9.77	keiki 3	2006-05-11	Mature	F1
Achatinella	lila	2007	2007-02-21	2002-05-25	2002	16.04	NonKeiki	1.05	4.74795	9.94	keiki 3	2006-05-24	Mature	F1
Achatinella	lila	2007	2007-02-21	2002-07-26 09:36:00	2002	15.8	NonKeiki	0.81	4.57699	9.97	keiki 3	2006-07-25 09:36:00	Mature	F1
Achatinella	lila	2007	2007-03-01	2002-11-05	2002	15.44	NonKeiki	0.45	4.32055	9.4	keiki 4	2006-11-04	Mature	F1
Achatinella	lila	2007	2007-03-05	2001-12-03 09:36:00	2001	16.75	NonKeiki	1.76	5.2537	11.6	keiki 3	2005-12-02 09:36:00	Mature	F1
Achatinella	lila	2007	2007-03-05	2001-12-03 09:36:00	2001	16.75	NonKeiki	1.76	5.2537	10.5	keiki 3	2005-12-02 09:36:00	Mature	F1
Achatinella	lila	2007	2007-03-05	2001-12-16 09:36:00	2001	16.7	NonKeiki	1.71	5.21808	11.1	keiki 3	2005-12-15 09:36:00	Mature	F1
Achatinella	lila	2007	2007-03-08	2002-01-19 14:24:00	2002	16.58	NonKeiki	1.59	5.1326	9.52	keiki 5	2006-01-18 14:24:00	Mature	F1
Achatinella	lila	2007	2007-03-20	2002-01-03	2002	16.69	NonKeiki	1.7	5.21096	12.01	keiki 3	2006-01-02	Mature	F1
Achatinella	lila	2007	2007-03-20	2002-11-08 09:36:00	2002	15.5	NonKeiki	0.51	4.36329	9.96	keiki 3	2006-11-07 09:36:00	Mature	F1
Achatinella	lila	2007	2007-03-20	2003-01-22 19:12:00	2003	15.21	NonKeiki	0.22	4.15671	9.9	keiki 3	2007-01-21 19:12:00	Mature	F2
Achatinella	lila	2007	2007-03-21	2001-01-15 09:36:00	2001	18.05	NonKeiki	3.06	6.17973	11	keiki	2005-01-14 09:36:00	Mature	F1
Achatinella	lila	2007	2007-04-05	2001-10-04 09:36:00	2001	17.1	NonKeiki	2.11	5.50301	11	keiki 5	2005-10-03 09:36:00	Mature	F1
Achatinella	lila	2007	2007-04-05	2001-11-09 19:12:00	2001	16.96	NonKeiki	1.97	5.40329	10.48	Adults	2005-11-08 19:12:00	Mature	F1
Achatinella	lila	2007	2007-04-05	2002-10-16 09:36:00	2002	15.65	NonKeiki	0.66	4.47014	10.7	keiki 5	2006-10-15 09:36:00	Mature	F1
Achatinella	lila	2007	2007-04-12	2002-03-16 09:36:00	2002	16.5	NonKeiki	1.51	5.07562	10.17	keiki 4	2006-03-15 09:36:00	Mature	F1
Achatinella	lila	2007	2007-04-16	2001-09-29 19:12:00	2001	17.16	NonKeiki	2.17	5.54575	10.6	keiki 3	2005-09-28 19:12:00	Mature	F1
Achatinella	lila	2007	2007-04-16	2001-10-15 09:36:00	2001	17.1	NonKeiki	2.11	5.50301	8.88	keiki 3	2005-10-14 09:36:00	Mature	F1
Achatinella	lila	2007	2007-04-16	2002-05-11 09:36:00	2002	16.3	NonKeiki	1.31	4.93315	10.72	keiki 3	2006-05-10 09:36:00	Mature	F1
Achatinella	lila	2007	2007-04-20	2002-01-15 19:12:00	2002	16.76	NonKeiki	1.77	5.26082	9.83	keiki 5	2006-01-14 19:12:00	Mature	F1
Achatinella	lila	2007	2007-04-23	2003-01-25 14:24:00	2003	15.33	NonKeiki	0.34	4.24219	8.81	keiki 2	2007-01-24 14:24:00	Mature	F2
Achatinella	lila	2007	2007-05-05	2001-09-25 09:36:00	2001	17.25	NonKeiki	2.26	5.60986	10.16	keiki 3	2005-09-24 09:36:00	Mature	F1
Achatinella	lila	2007	2007-05-05	2001-11-06	2001	17.09	NonKeiki	2.1	5.49589	9.75	keiki 5	2005-11-05	Mature	F1
Achatinella	lila	2007	2007-05-05	2002-03-26 09:36:00	2002	16.55	NonKeiki	1.56	5.11123	9.73	keiki 3	2006-03-25 09:36:00	Mature	F1
Achatinella	lila	2007	2007-05-05	2002-09-11 09:36:00	2002	15.9	NonKeiki	0.91	4.64822	9.95	keiki 5	2006-09-10 09:36:00	Mature	F1
Achatinella	lila	2007	2007-05-07	2003-05-05 09:36:00	2003	15	NonKeiki	0.01	4.00712	9.6	keiki 2	2007-05-04 09:36:00	Mature	F2
Achatinella	lila	2007	2007-05-09	2001-12-19	2001	16.94	NonKeiki	1.95	5.38904	10.21	keiki 3	2005-12-18	Mature	F1
Achatinella	lila	2007	2007-05-30	2002-07-07 09:36:00	2002	16.25	NonKeiki	1.26	4.89753	9.92	Adults	2006-07-06 09:36:00	Mature	F1
Achatinella	lila	2007	2007-05-31	2001-08-30 09:36:00	2001	17.45	NonKeiki	2.46	5.75233	10.1	keiki 5	2005-08-29 09:36:00	Mature	F1
Achatinella	lila	2007	2007-07-26	2001-10-02	2001	17.54	NonKeiki	2.55	5.81644	11.35	keiki	2005-10-01	Mature	F1
Achatinella	lila	2007	2007-09-13	2002-01-29 04:48:00	2002	17.27	NonKeiki	2.28	5.62411	10.46	keiki	2006-01-28 04:48:00	Mature	F1
Achatinella	lila	2007	2007-09-13	2002-12-25 09:36:00	2002	16	NonKeiki	1.01	4.71945	12.05	keiki 4	2006-12-24 09:36:00	Mature	F1
Achatinella	lila	2007	2007-10-18	2002-09-08 09:36:00	2002	16.55	NonKeiki	1.56	5.11123	12.35	Adults	2006-09-07 09:36:00	Mature	F1
Achatinella	lila	2007	2007-11-02	2003-05-28 09:36:00	2003	15.6	NonKeiki	0.61	4.43452	11.04	Adults	2007-05-27 09:36:00	Mature	F2
Achatinella	lila	2007	2007-12-27	2002-10-17 04:48:00	2002	16.67	NonKeiki	1.68	5.19671	10.05	keiki 3	2006-10-16 04:48:00	Mature	F1
Achatinella	lila	2008	2008-02-09	2003-04-24 19:12:00	2003	16.11	NonKeiki	1.12	4.79781	12	keiki 5	2007-04-23 19:12:00	Mature	F2
Achatinella	lila	2008	2008-04-22	2003-04-25	2003	16.39	NonKeiki	1.4	4.99726	9.98	keiki 2	2007-04-24	Mature	F2
Achatinella	lila	2008	2008-06-26	2002-07-02 14:24:00	2002	17.78	NonKeiki	2.79	5.9874	9.8	keiki 2	2006-07-01 14:24:00	Mature	F1
Achatinella	lila	2008	2008-07-09	2003-11-26 19:12:00	2003	15.86	NonKeiki	0.87	4.61973	9.43	Adults	2007-11-25 19:12:00	Mature	F2
Achatinella	lila	2008	2008-07-09	2004-06-27	2004	15.04	NonKeiki	0.05	4.03562	9.46	Adults	2008-06-26	Mature	F2
Achatinella	lila	2008	2008-07-28	2003-03-15 04:48:00	2003	16.92	NonKeiki	1.93	5.37479	9.44	keiki 2	2007-03-14 04:48:00	Mature	F2
Achatinella	lila	2008	2008-08-12	2004-05-11 09:36:00	2004	15.35	NonKeiki	0.36	4.25644	11.3	keiki 2	2008-05-10 09:36:00	Mature	F2
Achatinella	lila	2008	2008-08-21	2003-12-13 19:12:00	2003	15.96	NonKeiki	0.97	4.69096	12.46	Adults	2007-12-12 19:12:00	Mature	F2
Achatinella	lila	2008	2008-08-28	2004-07-05 09:36:00	2004	15.2	NonKeiki	0.21	4.14959	8.91	keiki 2	2008-07-04 09:36:00	Mature	F2
Achatinella	lila	2008	2008-09-04	2004-02-28 04:48:00	2004	15.72	NonKeiki	0.73	4.52	10.94	Adults	2008-02-27 04:48:00	Mature	F2
Achatinella	lila	2008	2008-09-04	2004-03-30 09:36:00	2004	15.6	NonKeiki	0.61	4.43452	11	Adults	2008-03-29 09:36:00	Mature	F2
Achatinella	lila	2008	2008-09-08	2003-09-21 09:36:00	2003	16.35	NonKeiki	1.36	4.96877	9.6	keiki 4	2007-09-20 09:36:00	Mature	F2
Achatinella	lila	2008	2008-09-18	2002-10-31	2002	17.64	NonKeiki	2.65	5.88767	9.9	Adults	2006-10-30	Mature	F1
Achatinella	lila	2008	2008-10-20	2003-10-20 09:36:00	2003	16.4	NonKeiki	1.41	5.00438	10.49	keiki 2	2007-10-19 09:36:00	Mature	F2
Achatinella	lila	2008	2008-10-30	2004-07-24 04:48:00	2004	15.37	NonKeiki	0.38	4.27068	9.29	Adults	2008-07-23 04:48:00	Mature	F2
Achatinella	lila	2008	2008-11-06	2003-07-30 14:24:00	2003	16.78	NonKeiki	1.79	5.27507	10.01	keiki 4	2007-07-29 14:24:00	Mature	F2
Achatinella	lila	2008	2008-11-06	2003-10-06 04:48:00	2003	16.52	NonKeiki	1.53	5.08986	10.02	keiki 4	2007-10-05 04:48:00	Mature	F2
Achatinella	lila	2008	2008-12-22	2003-09-25	2003	16.74	NonKeiki	1.75	5.24658	11.58	keiki 4	2007-09-24	Mature	F2
Achatinella	lila	2008	2008-12-30	2004-10-27	2004	15.24	NonKeiki	0.25	4.17808	10.18	keiki 5	2008-10-26	Mature	F2
Achatinella	lila	2009	2009-01-03	2004-06-02 04:48:00	2004	15.82	NonKeiki	0.83	4.59123	10.32	keiki	2008-06-01 04:48:00	Mature	F2
Achatinella	lila	2009	2009-01-04	2004-07-30 09:36:00	2004	15.6	NonKeiki	0.61	4.43452	10.24	keiki 4	2008-07-29 09:36:00	Mature	F2
Achatinella	lila	2009	2009-03-04	2004-08-16 19:12:00	2004	15.76	NonKeiki	0.77	4.54849	10.22	keiki	2008-08-15 19:12:00	Mature	F2
Achatinella	lila	2009	2009-03-23	2004-01-27 19:12:00	2004	16.61	NonKeiki	1.62	5.15397	10.27	keiki 4	2008-01-26 19:12:00	Mature	F2
Achatinella	lila	2009	2009-03-23	2004-09-17 19:12:00	2004	15.71	NonKeiki	0.72	4.51288	9.65	keiki 4	2008-09-16 19:12:00	Mature	F2
Achatinella	lila	2009	2009-04-09	2003-09-08 04:48:00	2003	17.22	NonKeiki	2.23	5.58849	9.87	Adults 5	2007-09-07 04:48:00	Mature	F2
Achatinella	lila	2009	2009-04-09	2003-10-22 09:36:00	2003	17.05	NonKeiki	2.06	5.4674	9.08	Adults 5	2007-10-21 09:36:00	Mature	F2
Achatinella	lila	2009	2009-04-09	2005-01-06 09:36:00	2005	15.35	NonKeiki	0.36	4.25644	10.17	Adults 4	2009-01-05 09:36:00	Mature	F2
Achatinella	lila	2009	2009-04-12	2003-08-26 14:24:00	2003	17.28	NonKeiki	2.29	5.63123	10.95	LD keiki 2	2007-08-25 14:24:00	Mature	F2
Achatinella	lila	2009	2009-04-23	2003-10-31 04:48:00	2003	17.07	NonKeiki	2.08	5.48164	10.77	Adults	2007-10-30 04:48:00	Mature	F2
Achatinella	lila	2009	2009-04-23	2004-05-02 19:12:00	2004	16.36	NonKeiki	1.37	4.97589	9.8	Adults 5	2008-05-01 19:12:00	Mature	F2
Achatinella	lila	2009	2009-04-23	2004-05-10 14:24:00	2004	16.33	NonKeiki	1.34	4.95452	10.55	Adults 5	2008-05-09 14:24:00	Mature	F2
Achatinella	lila	2009	2009-05-07	2002-06-17 09:36:00	2002	19.05	NonKeiki	4.06	6.89205	10.26	Adults 3	2006-06-16 09:36:00	Mature	F1
Achatinella	lila	2009	2009-05-07	2005-01-16 04:48:00	2005	15.42	NonKeiki	0.43	4.3063	9.11	Adults 3	2009-01-15 04:48:00	Mature	F2
Achatinella	lila	2009	2009-05-07	2005-02-06	2005	15.34	NonKeiki	0.35	4.24932	8.52	Adults 3	2009-02-05	Mature	F2
Achatinella	lila	2009	2009-05-21	2003-07-21 04:48:00	2003	17.57	NonKeiki	2.58	5.83781	10.24	Adults 4	2007-07-20 04:48:00	Mature	F2
Achatinella	lila	2009	2009-05-21	2004-01-19 04:48:00	2004	16.87	NonKeiki	1.88	5.33918	10.54	Adults 4	2008-01-18 04:48:00	Mature	F2
Achatinella	lila	2009	2009-05-21	2005-05-19 09:36:00	2005	15	NonKeiki	0.01	4.00712	10.1	Adults 4	2009-05-18 09:36:00	Mature	F2
Achatinella	lila	2009	2009-06-02	2003-04-17 14:24:00	2003	17.98	NonKeiki	2.99	6.12986	10.82	Adults 5	2007-04-16 14:24:00	Mature	F2
Achatinella	lila	2009	2009-06-02	2003-07-22 19:12:00	2003	17.61	NonKeiki	2.62	5.8663	10.94	Adults 5	2007-07-21 19:12:00	Mature	F2
Achatinella	lila	2009	2009-06-10	2003-08-07 14:24:00	2003	17.58	NonKeiki	2.59	5.84493	10.42	Adults 3	2007-08-06 14:24:00	Mature	F2
Achatinella	lila	2009	2009-06-19	2003-12-29 19:12:00	2003	17.06	NonKeiki	2.07	5.47452	15.5	Adults 5	2007-12-28 19:12:00	Mature	F2
Achatinella	lila	2009	2009-06-19	2004-10-16	2004	15.94	NonKeiki	0.95	4.67671	9.08	Adults 5	2008-10-15	Mature	F2
Achatinella	lila	2009	2009-06-30	2005-02-18 09:36:00	2005	15.5	NonKeiki	0.51	4.36329	9.51	HD keiki 2	2009-02-17 09:36:00	Mature	F2
Achatinella	lila	2009	2009-07-09	2002-05-17 19:12:00	2002	19.41	NonKeiki	4.42	7.14849	11.91	HD keiki 3	2006-05-16 19:12:00	Mature	F1
Achatinella	lila	2009	2009-07-09	2004-08-06	2004	16.29	NonKeiki	1.3	4.92603	11.71	Adults 3	2008-08-05	Mature	F2
Achatinella	lila	2009	2009-07-24	2005-05-21	2005	15.24	NonKeiki	0.25	4.17808	9.78	LD keiki 2	2009-05-20	Mature	F2
Achatinella	lila	2009	2009-08-06	2003-11-24 14:24:00	2003	17.38	NonKeiki	2.39	5.70247	8.44	Adults 3	2007-11-23 14:24:00	Mature	F2
Achatinella	lila	2009	2009-08-31	2003-11-08	2003	17.54	NonKeiki	2.55	5.81644	9.16	Adults 1	2007-11-07	Mature	F2
Achatinella	lila	2009	2009-09-15	2003-10-09 19:12:00	2003	17.71	NonKeiki	2.72	5.93753	11.78	Adults 3	2007-10-08 19:12:00	Mature	F2
Achatinella	lila	2009	2009-09-15	2004-08-24 14:24:00	2004	16.48	NonKeiki	1.49	5.06137	11.87	Adults 3	2008-08-23 14:24:00	Mature	F2
Achatinella	lila	2009	2009-09-15	2005-01-17 04:48:00	2005	15.92	NonKeiki	0.93	4.66247	10.31	LD keiki 3	2009-01-16 04:48:00	Mature	F2
Achatinella	lila	2009	2009-09-18	2003-09-09	2003	17.84	NonKeiki	2.85	6.03014	11.93	Adults 1	2007-09-08	Mature	F2
Achatinella	lila	2009	2009-09-21	2004-01-17 09:36:00	2004	17.35	NonKeiki	2.36	5.6811	11.4	Adults 1	2008-01-16 09:36:00	Mature	F2
Achatinella	lila	2009	2009-09-21	2004-09-23	2004	16.39	NonKeiki	1.4	4.99726	10.5	Adults 3	2008-09-22	Mature	F2
Achatinella	lila	2009	2009-09-22	2004-08-10 19:12:00	2004	16.56	NonKeiki	1.57	5.11836	7.37	LD keiki 1	2008-08-09 19:12:00	Mature	F2
Achatinella	lila	2009	2009-09-23	2003-12-06 04:48:00	2003	17.52	NonKeiki	2.53	5.80219	8.35	LD keiki 1	2007-12-05 04:48:00	Mature	F2
Achatinella	lila	2009	2009-09-28	2002-04-14 09:36:00	2002	19.85	NonKeiki	4.86	7.46192	11.5	LD keiki 3	2006-04-13 09:36:00	Mature	F1
Achatinella	lila	2009	2009-09-28	2003-11-15 04:48:00	2003	17.62	NonKeiki	2.63	5.87342	7.09	HD keiki 2	2007-11-14 04:48:00	Mature	F2
Achatinella	lila	2009	2009-10-10	2004-03-12 19:12:00	2004	17.21	NonKeiki	2.22	5.58137	11.95	LD keiki 1	2008-03-11 19:12:00	Mature	F2
Achatinella	lila	2009	2009-10-10	2004-06-22 04:48:00	2004	16.82	NonKeiki	1.83	5.30356	11.36	HD keiki 1	2008-06-21 04:48:00	Mature	F2
Achatinella	lila	2009	2009-10-10	2004-09-23 19:12:00	2004	16.46	NonKeiki	1.47	5.04712	11.42	LD keiki 2	2008-09-22 19:12:00	Mature	F2
Achatinella	lila	2009	2009-10-10	2005-07-30 04:48:00	2005	15.27	NonKeiki	0.28	4.19945	11.57	Adults 2	2009-07-29 04:48:00	Mature	F2
Achatinella	lila	2009	2009-10-12	2003-05-15 14:24:00	2003	18.38	NonKeiki	3.39	6.41479	10.72	HD keiki 3	2007-05-14 14:24:00	Mature	F2
Achatinella	lila	2009	2009-10-16	2003-11-28	2003	17.64	NonKeiki	2.65	5.88767	10.52	HD keiki 2	2007-11-27	Mature	F2
Achatinella	lila	2009	2009-10-16	2004-07-08 14:24:00	2004	16.78	NonKeiki	1.79	5.27507	10.06	HD keiki 2	2008-07-07 14:24:00	Mature	F2
Achatinella	lila	2009	2009-10-16	2005-01-17	2005	16.04	NonKeiki	1.05	4.74795	10.55	HD keiki 2	2009-01-16	Mature	F2
Achatinella	lila	2009	2009-10-16	2005-01-30	2005	15.99	NonKeiki	1	4.71233	10.37	HD keiki 2	2009-01-29	Mature	F2
Achatinella	lila	2009	2009-10-16	2005-05-16 14:24:00	2005	15.58	NonKeiki	0.59	4.42027	10.05	HD keiki 3	2009-05-15 14:24:00	Mature	F2
Achatinella	lila	2009	2009-10-23	2003-05-18 19:12:00	2003	18.41	NonKeiki	3.42	6.43616	10.89	HD keiki 2	2007-05-17 19:12:00	Mature	F2
Achatinella	lila	2009	2009-10-23	2003-11-03 19:12:00	2003	17.76	NonKeiki	2.77	5.97315	10.55	HD keiki 2	2007-11-02 19:12:00	Mature	F2
Achatinella	lila	2009	2009-10-23	2005-03-09 04:48:00	2005	15.87	NonKeiki	0.88	4.62685	10.33	HD keiki 2	2009-03-08 04:48:00	Mature	F2
Achatinella	lila	2009	2009-10-24	2004-05-07 09:36:00	2004	17.05	NonKeiki	2.06	5.4674	10.71	Adults 1	2008-05-06 09:36:00	Mature	F2
Achatinella	lila	2009	2009-10-31	2003-06-19 04:48:00	2003	18.32	NonKeiki	3.33	6.37205	11.44	Adults 3	2007-06-18 04:48:00	Mature	F2
Achatinella	lila	2009	2009-10-31	2003-09-10 09:36:00	2003	18	NonKeiki	3.01	6.14411	10.84	LD keiki 2	2007-09-09 09:36:00	Mature	F2
Achatinella	lila	2009	2009-10-31	2003-09-20 19:12:00	2003	17.96	NonKeiki	2.97	6.11562	10.98	HD keiki 1	2007-09-19 19:12:00	Mature	F2
Achatinella	lila	2009	2009-10-31	2003-09-23 09:36:00	2003	17.95	NonKeiki	2.96	6.10849	11.25	Adults 3	2007-09-22 09:36:00	Mature	F2
Achatinella	lila	2009	2009-10-31	2003-11-06 14:24:00	2003	17.78	NonKeiki	2.79	5.9874	10.95	HD keiki 2	2007-11-05 14:24:00	Mature	F2
Achatinella	lila	2009	2009-10-31	2004-01-02 19:12:00	2004	17.56	NonKeiki	2.57	5.83068	10.86	LD keiki 1	2008-01-01 19:12:00	Mature	F2
Achatinella	lila	2009	2009-10-31	2004-04-28 19:12:00	2004	17.11	NonKeiki	2.12	5.51014	10.29	LD keiki 2	2008-04-27 19:12:00	Mature	F2
Achatinella	lila	2009	2009-10-31	2004-04-28 19:12:00	2004	17.11	NonKeiki	2.12	5.51014	10.29	LD keiki 2	2008-04-27 19:12:00	Mature	F2
Achatinella	lila	2009	2009-10-31	2004-05-27 09:36:00	2004	17	NonKeiki	2.01	5.43178	10.41	Adults 3	2008-05-26 09:36:00	Mature	F2
Achatinella	lila	2009	2009-10-31	2004-08-26 09:36:00	2004	16.65	NonKeiki	1.66	5.18247	10.48	Adults 3	2008-08-25 09:36:00	Mature	F2
Achatinella	lila	2009	2009-10-31	2005-01-03 09:36:00	2005	16.15	NonKeiki	1.16	4.8263	9.78	LD keiki 2	2009-01-02 09:36:00	Mature	F2
Achatinella	lila	2009	2009-10-31	2005-02-19 04:48:00	2005	15.97	NonKeiki	0.98	4.69808	10.54	LD keiki 1	2009-02-18 04:48:00	Mature	F2
Achatinella	lila	2009	2009-10-31	2005-02-24 09:36:00	2005	15.95	NonKeiki	0.96	4.68384	10.07	LD keiki 2	2009-02-23 09:36:00	Mature	F2
Achatinella	lila	2009	2009-10-31	2005-07-09 14:24:00	2005	15.43	NonKeiki	0.44	4.31342	9.85	LD keiki 2	2009-07-08 14:24:00	Mature	F2
Achatinella	lila	2009	2009-10-31	2005-08-02	2005	15.34	NonKeiki	0.35	4.24932	10.45	HD keiki 1	2009-08-01	Mature	F2
Achatinella	lila	2009	2009-10-31	2005-09-17 19:12:00	2005	15.16	NonKeiki	0.17	4.1211	10.24	LD keiki 2	2009-09-16 19:12:00	Mature	F2
Achatinella	lila	2009	2009-10-31	2005-09-23	2005	15.14	NonKeiki	0.15	4.10685	10.38	LD keiki 1	2009-09-22	Mature	F2
Achatinella	lila	2009	2009-11-12	2003-08-01 09:36:00	2003	18.2	NonKeiki	3.21	6.28658	11.49	Adults 1	2007-07-31 09:36:00	Mature	F2
Achatinella	lila	2009	2009-11-12	2004-06-29 04:48:00	2004	16.92	NonKeiki	1.93	5.37479	10.98	Adults 1	2008-06-28 04:48:00	Mature	F2
Achatinella	lila	2009	2009-11-12	2004-08-22 19:12:00	2004	16.71	NonKeiki	1.72	5.22521	10.71	LD keiki 2	2008-08-21 19:12:00	Mature	F2
Achatinella	lila	2009	2009-11-12	2005-04-16 09:36:00	2005	15.8	NonKeiki	0.81	4.57699	10.38	LD keiki 1	2009-04-15 09:36:00	Mature	F2
Achatinella	lila	2009	2009-11-13	2003-07-30 19:12:00	2003	18.21	NonKeiki	3.22	6.2937	10.95	Adults 3	2007-07-29 19:12:00	Mature	F2
Achatinella	lila	2009	2009-11-13	2003-09-18 04:48:00	2003	18.02	NonKeiki	3.03	6.15836	11.45	LD keiki 3	2007-09-17 04:48:00	Mature	F2
Achatinella	lila	2009	2009-11-13	2003-12-26	2003	17.64	NonKeiki	2.65	5.88767	11.15	LD keiki 3	2007-12-25	Mature	F2
Achatinella	lila	2009	2009-11-20	2005-10-07 19:12:00	2005	15.16	NonKeiki	0.17	4.1211	11.23	LD keiki 2	2009-10-06 19:12:00	Mature	F2
Achatinella	lila	2009	2009-11-24	2004-03-21 09:36:00	2004	17.35	NonKeiki	2.36	5.6811	10.91	LD keiki 1	2008-03-20 09:36:00	Mature	F2
Achatinella	lila	2009	2009-11-24	2004-11-15 14:24:00	2004	16.43	NonKeiki	1.44	5.02575	9.56	Adults 1	2008-11-14 14:24:00	Mature	F2
Achatinella	lila	2009	2009-11-24	2005-11-22 09:36:00	2005	15	NonKeiki	0.01	4.00712	10.25	Adults 1	2009-11-21 09:36:00	Mature	F2
Achatinella	lila	2009	2009-11-25	2003-12-04 04:48:00	2003	17.77	NonKeiki	2.78	5.98027	10.76	HD keiki 2	2007-12-03 04:48:00	Mature	F2
Achatinella	lila	2009	2009-11-25	2004-06-26 14:24:00	2004	16.98	NonKeiki	1.99	5.41753	10.77	Adults 3	2008-06-25 14:24:00	Mature	F2
Achatinella	lila	2009	2009-11-29	2004-09-24 09:36:00	2004	16.65	NonKeiki	1.66	5.18247	10.74	LD keiki 2	2008-09-23 09:36:00	Mature	F2
Achatinella	lila	2009	2009-12-11	2004-07-30 19:12:00	2004	16.91	NonKeiki	1.92	5.36767	10.61	LD keiki 2	2008-07-29 19:12:00	Mature	F2
Achatinella	lila	2009	2009-12-11	2004-08-02 09:36:00	2004	16.9	NonKeiki	1.91	5.36055	10.33	Adults 1	2008-08-01 09:36:00	Mature	F2
Achatinella	lila	2009	2009-12-11	2005-05-15 09:36:00	2005	15.8	NonKeiki	0.81	4.57699	9.6	LD keiki 1	2009-05-14 09:36:00	Mature	F2
Achatinella	lila	2009	2009-12-12	2005-06-27	2005	15.64	NonKeiki	0.65	4.46301	9.41	LD keiki 2	2009-06-26	Mature	F2
Achatinella	lila	2009	2009-12-23	2004-01-06 09:36:00	2004	17.75	NonKeiki	2.76	5.96603	11.01	Adults 3	2008-01-05 09:36:00	Mature	F2
Achatinella	lila	2009	2009-12-23	2004-09-09 09:36:00	2004	16.8	NonKeiki	1.81	5.28932	10.68	LD keiki 3	2008-09-08 09:36:00	Mature	F2
Achatinella	lila	2009	2009-12-23	2004-11-03	2004	16.59	NonKeiki	1.6	5.13973	10.65	HD keiki 3	2008-11-02	Mature	F2
Achatinella	lila	2009	2009-12-23	2005-06-04 04:48:00	2005	15.77	NonKeiki	0.78	4.55562	10.3	LD keiki 3	2009-06-03 04:48:00	Mature	F2
Achatinella	lila	2009	2009-12-29	2003-08-06 19:12:00	2003	18.36	NonKeiki	3.37	6.40055	10.53	HD keiki 1	2007-08-05 19:12:00	Mature	F2
Achatinella	lila	2009	2009-12-29	2005-05-25 14:24:00	2005	15.83	NonKeiki	0.84	4.59836	10.08	HD keiki 2	2009-05-24 14:24:00	Mature	F2
Achatinella	lila	2009	2009-12-29	2005-06-25 19:12:00	2005	15.71	NonKeiki	0.72	4.51288	9.92	HD keiki 1	2009-06-24 19:12:00	Mature	F2
Achatinella	lila	2009	2009-12-29	2005-07-27	2005	15.59	NonKeiki	0.6	4.4274	9.62	HD keiki 1	2009-07-26	Mature	F2
Achatinella	lila	2009	2009-12-29	2005-09-17	2005	15.39	NonKeiki	0.4	4.28493	9.25	HD keiki 1	2009-09-16	Mature	F2
Achatinella	lila	2009	2009-12-29	2005-09-19 14:24:00	2005	15.38	NonKeiki	0.39	4.27781	9.64	HD keiki 1	2009-09-18 14:24:00	Mature	F2
Achatinella	lila	2009	2009-12-30	2005-04-30 14:24:00	2005	15.93	NonKeiki	0.94	4.66959	10.12	Adults 1	2009-04-29 14:24:00	Mature	F2
Achatinella	lila	2009	2009-12-30	2005-07-04 14:24:00	2005	15.68	NonKeiki	0.69	4.49151	9.09	Adults 1	2009-07-03 14:24:00	Mature	F2
Achatinella	lila	2010	2010-01-14	2004-11-14 14:24:00	2004	16.63	NonKeiki	1.64	5.16822	9.68	HD keiki 2	2008-11-13 14:24:00	Mature	F2
Achatinella	lila	2010	2010-01-14	2005-09-14 19:12:00	2005	15.46	NonKeiki	0.47	4.33479	9.05	LD keiki 2	2009-09-13 19:12:00	Mature	F2
Achatinella	lila	2010	2010-01-14	2005-11-29 04:48:00	2005	15.17	NonKeiki	0.18	4.12822	9.57	HD keiki1	2009-11-28 04:48:00	Mature	F2
Achatinella	lila	2010	2010-01-14	2006-01-07 04:48:00	2006	15.02	NonKeiki	0.03	4.02137	9.53	HD keiki 2	2010-01-06 04:48:00	Mature	F2
Achatinella	lila	2010	2010-01-15	2003-07-26 04:48:00	2003	18.47	NonKeiki	3.48	6.4789	10.54	LD keiki 1	2007-07-25 04:48:00	Mature	F2
Achatinella	lila	2010	2010-01-15	2004-01-08 14:24:00	2004	17.83	NonKeiki	2.84	6.02301	9.97	Adults 2	2008-01-07 14:24:00	Mature	F2
Achatinella	lila	2010	2010-01-15	2004-04-19	2004	17.44	NonKeiki	2.45	5.74521	9.45	LD keiki 1	2008-04-18	Mature	F2
Achatinella	lila	2010	2010-01-15	2004-09-24 14:24:00	2004	16.83	NonKeiki	1.84	5.31068	9.69	Adults 1	2008-09-23 14:24:00	Mature	F2
Achatinella	lila	2010	2010-01-15	2005-12-21	2005	15.09	NonKeiki	0.1	4.07123	8.65	LD keiki 1	2009-12-20	Mature	F2
Achatinella	lila	2010	2010-02-02	2005-09-26	2005	15.49	NonKeiki	0.5	4.35616	9.43	LD keiki 1	2009-09-25	Mature	F2
Achatinella	lila	2010	2010-02-05	2004-11-08	2004	16.74	NonKeiki	1.75	5.24658	9.62	HD keiki 1	2008-11-07	Mature	F2
Achatinella	lila	2010	2010-02-05	2005-09-08 04:48:00	2005	15.57	NonKeiki	0.58	4.41315	9.28	Adults 2	2009-09-07 04:48:00	Mature	F2
Achatinella	lila	2010	2010-02-05	2005-12-29	2005	15.14	NonKeiki	0.15	4.10685	8.77	HD keiki 1	2009-12-28	Mature	F2
Achatinella	lila	2010	2010-02-06	2005-12-19 14:24:00	2005	15.18	NonKeiki	0.19	4.13534	8.43	HD keiki 2	2009-12-18 14:24:00	Mature	F2
Achatinella	lila	2010	2010-02-08	2004-09-17 09:36:00	2004	16.95	NonKeiki	1.96	5.39616	9.14	HD keiki 1	2008-09-16 09:36:00	Mature	F2
Achatinella	lila	2010	2010-02-18	2004-02-24 14:24:00	2004	17.78	NonKeiki	2.79	5.9874	10.94	LD keiki 1	2008-02-23 14:24:00	Mature	F2
Achatinella	lila	2010	2010-02-18	2004-11-02 19:12:00	2004	16.81	NonKeiki	1.82	5.29644	10.7	No Juves 1	2008-11-01 19:12:00	Mature	F2
Achatinella	lila	2010	2010-02-18	2004-12-09 04:48:00	2004	16.67	NonKeiki	1.68	5.19671	9.4	Adults 2	2008-12-08 04:48:00	Mature	F2
Achatinella	lila	2010	2010-02-19	2005-02-10 14:24:00	2005	16.43	NonKeiki	1.44	5.02575	9.56	HD keiki 3	2009-02-09 14:24:00	Mature	F2
Achatinella	lila	2010	2010-02-19	2005-09-24 19:12:00	2005	15.56	NonKeiki	0.57	4.40603	8.76	HD keiki 3	2009-09-23 19:12:00	Mature	F2
Achatinella	lila	2010	2010-03-04	2005-01-20 19:12:00	2005	16.56	NonKeiki	1.57	5.11836	9.09	Adults 2	2009-01-19 19:12:00	Mature	F2
Achatinella	lila	2010	2010-03-05	2005-07-02	2005	15.94	NonKeiki	0.95	4.67671	9.61	HD keiki 1	2009-07-01	Mature	F2
Achatinella	lila	2010	2010-03-18	2006-02-26 04:48:00	2006	15.07	NonKeiki	0.08	4.05699	8.45	Adults 1	2010-02-25 04:48:00	Mature	F2
Achatinella	lila	2010	2010-03-19	2005-07-10 19:12:00	2005	15.96	NonKeiki	0.97	4.69096	9.84	LD keiki 1	2009-07-09 19:12:00	Mature	F2
Achatinella	lila	2010	2010-03-20	2004-12-23 14:24:00	2004	16.73	NonKeiki	1.74	5.23945	8.17	HD keiki 1	2008-12-22 14:24:00	Mature	F2
Achatinella	lila	2010	2010-03-22	2005-02-18 04:48:00	2005	16.52	NonKeiki	1.53	5.08986	9.68	LD keiki 2	2009-02-17 04:48:00	Mature	F2
Achatinella	lila	2010	2010-03-22	2005-07-08 14:24:00	2005	15.98	NonKeiki	0.99	4.70521	9.02	LD keiki 2	2009-07-07 14:24:00	Mature	F2
Achatinella	lila	2010	2010-04-02	2005-03-11 14:24:00	2005	16.48	NonKeiki	1.49	5.06137	10.5	LD keiki 2	2009-03-10 14:24:00	Mature	F2
Achatinella	lila	2010	2010-04-02	2005-07-14 09:36:00	2005	16	NonKeiki	1.01	4.71945	9.56	Adults 2	2009-07-13 09:36:00	Mature	F2
Achatinella	lila	2010	2010-04-02	2005-12-27 19:12:00	2005	15.36	NonKeiki	0.37	4.26356	8.82	Adults 1	2009-12-26 19:12:00	Mature	F2
Achatinella	lila	2010	2010-04-02	2006-02-20 09:36:00	2006	15.15	NonKeiki	0.16	4.11397	9.18	LD keiki 2	2010-02-19 09:36:00	Mature	F2
Achatinella	lila	2010	2010-04-05	2005-03-25	2005	16.44	NonKeiki	1.45	5.03288	9.74	LD keiki 1	2009-03-24	Mature	F2
Achatinella	lila	2010	2010-04-05	2005-04-27 19:12:00	2005	16.31	NonKeiki	1.32	4.94027	9.33	Adults 3	2009-04-26 19:12:00	Mature	F2
Achatinella	lila	2010	2010-04-05	2005-05-16	2005	16.24	NonKeiki	1.25	4.89041	8.57	HD keiki 3	2009-05-15	Mature	F2
Achatinella	lila	2010	2010-04-05	2005-08-04 14:24:00	2005	15.93	NonKeiki	0.94	4.66959	9.39	Adults 3	2009-08-03 14:24:00	Mature	F2
Achatinella	lila	2010	2010-04-05	2005-09-28 04:48:00	2005	15.72	NonKeiki	0.73	4.52	9.23	LD keiki 1	2009-09-27 04:48:00	Mature	F2
Achatinella	lila	2010	2010-04-06	2006-04-04 09:36:00	2006	15	NonKeiki	0.01	4.00712	8.52	Cage 2	2010-04-03 09:36:00	Mature	F2
Achatinella	lila	2010	2010-04-11	2004-08-11 14:24:00	2004	17.33	NonKeiki	2.34	5.66685	9.97	Adults 2	2008-08-10 14:24:00	Mature	F2
Achatinella	lila	2010	2010-04-17	2004-10-19	2004	17.09	NonKeiki	2.1	5.49589	9.31	HD keiki 2	2008-10-18	Mature	F2
Achatinella	lila	2010	2010-04-17	2004-12-30 19:12:00	2004	16.81	NonKeiki	1.82	5.29644	9.58	LD keiki 2	2008-12-29 19:12:00	Mature	F2
Achatinella	lila	2010	2010-04-19	2005-01-20	2005	16.74	NonKeiki	1.75	5.24658	9.4	HD keiki 3	2009-01-19	Mature	F2
Achatinella	lila	2010	2010-04-29	2005-11-25	2005	15.59	NonKeiki	0.6	4.4274	9.56	Adults 2	2009-11-24	Mature	F2
Achatinella	lila	2010	2010-04-30	2005-05-28	2005	16.29	NonKeiki	1.3	4.92603	9.49	HD keiki 2	2009-05-27	Mature	F2
Achatinella	lila	2010	2010-04-30	2005-11-02 14:24:00	2005	15.68	NonKeiki	0.69	4.49151	9.84	LD keiki 3	2009-11-01 14:24:00	Mature	F2
Achatinella	lila	2010	2010-05-14	2005-04-01 19:12:00	2005	16.56	NonKeiki	1.57	5.11836	9.55	HD keiki 2	2009-03-31 19:12:00	Mature	F2
Achatinella	lila	2010	2010-05-14	2005-05-29	2005	16.34	NonKeiki	1.35	4.96164	8.46	LD keiki 2	2009-05-28	Mature	F2
Achatinella	lila	2010	2010-05-14	2005-09-17 19:12:00	2005	15.91	NonKeiki	0.92	4.65534	9.22	LD keiki 3	2009-09-16 19:12:00	Mature	F2
Achatinella	lila	2010	2010-05-15	2005-01-12 04:48:00	2005	16.87	NonKeiki	1.88	5.33918	9.78	HD keiki 1	2009-01-11 04:48:00	Mature	F2
Achatinella	lila	2010	2010-05-28	2005-02-22 19:12:00	2005	16.76	NonKeiki	1.77	5.26082	9.54	LR Juve 2	2009-02-21 19:12:00	Mature	F2
Achatinella	lila	2010	2010-05-28	2005-09-08 09:36:00	2005	16	NonKeiki	1.01	4.71945	9.5	No Juve 2	2009-09-07 09:36:00	Mature	F2
Achatinella	lila	2010	2010-05-28	2005-11-04 14:24:00	2005	15.78	NonKeiki	0.79	4.56274	9.9	LR Juve 2	2009-11-03 14:24:00	Mature	F2
Achatinella	lila	2010	2010-05-28	2006-03-09 09:36:00	2006	15.3	NonKeiki	0.31	4.22082	9.6	LR Juve 2	2010-03-08 09:36:00	Mature	F2
Achatinella	lila	2010	2010-06-10	2005-07-08	2005	16.29	NonKeiki	1.3	4.92603	9.32	LR Juve 2	2009-07-07	Mature	F2
Achatinella	lila	2010	2010-06-24	2003-11-11 04:48:00	2003	18.67	NonKeiki	3.68	6.62137	10.29	No Juve 2	2007-11-10 04:48:00	Mature	F2
Achatinella	lila	2010	2010-06-25	2005-07-04 19:12:00	2005	16.36	NonKeiki	1.37	4.97589	9.43	HR Juve 2	2009-07-03 19:12:00	Mature	F2
Achatinella	lila	2010	2010-06-25	2005-07-10	2005	16.34	NonKeiki	1.35	4.96164	9.16	LR Juve 1	2009-07-09	Mature	F2
Achatinella	lila	2010	2010-07-19	2004-09-09 09:36:00	2004	17.6	NonKeiki	2.61	5.85918	8.6	Extra snails 1	2008-09-08 09:36:00	Mature	F2
Achatinella	lila	2010	2010-08-02	2005-05-02 09:36:00	2005	16.75	NonKeiki	1.76	5.2537	12.69	LR Juve 3	2009-05-01 09:36:00	Mature	F2
Achatinella	lila	2010	2010-08-28	2006-07-31 09:36:00	2006	15.1	NonKeiki	0.11	4.07836	9.18	HR Juve 3	2010-07-30 09:36:00	Mature	F2
Achatinella	lila	2010	2010-09-02	2005-01-23 09:36:00	2005	17.25	NonKeiki	2.26	5.60986	9.67	LD keiki 2	2009-01-22 09:36:00	Mature	F2
Achatinella	lila	2010	2010-11-04	2006-05-04 09:36:00	2006	15.7	NonKeiki	0.71	4.50575	9.36	HR Juve 2	2010-05-03 09:36:00	Mature	F2
Achatinella	lila	2010	2010-11-11	2006-01-27 09:36:00	2006	16.1	NonKeiki	1.11	4.79068	9.35	HR Juve 2	2010-01-26 09:36:00	Mature	F2
Achatinella	lila	2010	2010-11-12	2005-07-22 14:24:00	2005	16.83	NonKeiki	1.84	5.31068	9.71	HR Juve 3	2009-07-21 14:24:00	Mature	F2
Achatinella	lila	2010	2010-11-12	2006-04-19	2006	15.79	NonKeiki	0.8	4.56986	10.57	HD keiki 2	2010-04-18	Mature	F2
Achatinella	lila	2010	2010-11-12	2006-06-17 19:12:00	2006	15.56	NonKeiki	0.57	4.40603	8.93	HR Juve 3	2010-06-16 19:12:00	Mature	F2
Achatinella	lila	2010	2010-11-12	2006-09-19 09:36:00	2006	15.2	NonKeiki	0.21	4.14959	9.6	HR Juve 3	2010-09-18 09:36:00	Mature	F2
Achatinella	lila	2010	2010-11-22	2004-09-26 04:48:00	2004	18.02	NonKeiki	3.03	6.15836	9.85	LR Juve 1	2008-09-25 04:48:00	Mature	F2
Achatinella	lila	2010	2010-11-22	2006-03-18 09:36:00	2006	15.95	NonKeiki	0.96	4.68384	9.3	No Juves 1	2010-03-17 09:36:00	Mature	F2
Achatinella	lila	2010	2010-11-22	2006-09-13 19:12:00	2006	15.26	NonKeiki	0.27	4.19233	8.5	LR Juve 3	2010-09-12 19:12:00	Mature	F2
Achatinella	lila	2010	2010-12-07	2006-10-11 19:12:00	2006	15.21	NonKeiki	0.22	4.15671	8.77	HR Juve 1	2010-10-10 19:12:00	Mature	F2
Achatinella	lila	2010	2010-12-09	2005-05-14 09:36:00	2005	17.2	NonKeiki	2.21	5.57425	9.59	HR Juve 3	2009-05-13 09:36:00	Mature	F2
Achatinella	lila	2010	2010-12-09	2005-11-17 14:24:00	2005	16.48	NonKeiki	1.49	5.06137	9.4	HR Juve 3	2009-11-16 14:24:00	Mature	F2
Achatinella	lila	2010	2010-12-09	2005-12-21 09:36:00	2005	16.35	NonKeiki	1.36	4.96877	10.13	HR Juve 3	2009-12-20 09:36:00	Mature	F2
Achatinella	lila	2010	2010-12-09	2005-12-26 14:24:00	2005	16.33	NonKeiki	1.34	4.95452	9.4	HR Juve 3	2009-12-25 14:24:00	Mature	F2
Achatinella	lila	2010	2010-12-09	2006-01-29 09:36:00	2006	16.2	NonKeiki	1.21	4.86192	10.32	LR Juve 3	2010-01-28 09:36:00	Mature	F2
Achatinella	lila	2010	2010-12-09	2006-10-16 09:36:00	2006	15.2	NonKeiki	0.21	4.14959	9.45	HR Juve 3	2010-10-15 09:36:00	Mature	F2
Achatinella	lila	2010	2010-12-09	2006-11-11 09:36:00	2006	15.1	NonKeiki	0.11	4.07836	9.42	HR Juve 3	2010-11-10 09:36:00	Mature	F2
Achatinella	lila	2010	2010-12-30	2005-11-23	2005	16.54	NonKeiki	1.55	5.10411	9.5	HR Juve 2	2009-11-22	Mature	F2
Achatinella	lila	2010	2010-12-30	2006-03-04 09:36:00	2006	16.15	NonKeiki	1.16	4.8263	9.2	No Juve 3	2010-03-03 09:36:00	Mature	F2
Achatinella	lila	2010	2010-12-30	2006-05-03 04:48:00	2006	15.92	NonKeiki	0.93	4.66247	9.09	LR Juve 3	2010-05-02 04:48:00	Mature	F2
Achatinella	lila	2010	2010-12-30	2006-09-02 09:36:00	2006	15.45	NonKeiki	0.46	4.32767	9.3	LR Juve 3	2010-09-01 09:36:00	Mature	F2
Achatinella	lila	2011	2011-01-04	2005-09-11	2005	16.84	NonKeiki	1.85	5.31781	11.88	Population 1	2009-09-10	Mature	F2
Achatinella	lila	2011	2011-01-05	2006-04-10 14:24:00	2006	16.03	NonKeiki	1.04	4.74082	11.55	Population 5	2010-04-09 14:24:00	Mature	F2
Achatinella	lila	2011	2011-01-10	2006-03-02 09:36:00	2006	16.2	NonKeiki	1.21	4.86192	9.5	HR Juve 1	2010-03-01 09:36:00	Mature	F2
Achatinella	lila	2011	2011-01-11	2004-10-09 19:12:00	2004	18.16	NonKeiki	3.17	6.25808	11.36		2008-10-08 19:12:00	Mature	F2
Achatinella	lila	2011	2011-01-11	2004-12-06	2004	17.94	NonKeiki	2.95	6.10137	10.69		2008-12-05	Mature	F2
Achatinella	lila	2011	2011-01-11	2005-04-30 14:24:00	2005	17.38	NonKeiki	2.39	5.70247	9.93		2009-04-29 14:24:00	Mature	F2
Achatinella	lila	2011	2011-01-11	2005-06-06	2005	17.24	NonKeiki	2.25	5.60274	10.61		2009-06-05	Mature	F2
Achatinella	lila	2011	2011-01-11	2005-07-09 19:12:00	2005	17.11	NonKeiki	2.12	5.51014	9.56		2009-07-08 19:12:00	Mature	F2
Achatinella	lila	2011	2011-01-11	2006-05-04 19:12:00	2006	15.96	NonKeiki	0.97	4.69096	9.65		2010-05-03 19:12:00	Mature	F2
Achatinella	lila	2011	2011-01-11	2006-08-06 09:36:00	2006	15.6	NonKeiki	0.61	4.43452	9.83		2010-08-05 09:36:00	Mature	F2
Achatinella	lila	2011	2011-01-11	2006-09-04	2006	15.49	NonKeiki	0.5	4.35616	9.65		2010-09-03	Mature	F2
Achatinella	lila	2011	2011-01-25	2005-06-17 09:36:00	2005	17.25	NonKeiki	2.26	5.60986	10.47	Population 2	2009-06-16 09:36:00	Mature	F2
Achatinella	lila	2011	2011-02-07	2006-05-03 04:48:00	2006	16.07	NonKeiki	1.08	4.76932	9.7	Population 5	2010-05-02 04:48:00	Mature	F2
Achatinella	lila	2011	2011-02-10	2005-04-16 09:36:00	2005	17.55	NonKeiki	2.56	5.82356	9.66	Supplement	2009-04-15 09:36:00	Mature	F2
Achatinella	lila	2011	2011-02-24	2006-09-06 09:36:00	2006	15.65	NonKeiki	0.66	4.47014	9.5	Population 6	2010-09-05 09:36:00	Mature	F2
Achatinella	lila	2011	2011-03-07	2006-06-18 09:36:00	2006	16	NonKeiki	1.01	4.71945	9.75	Population 1	2010-06-17 09:36:00	Mature	F2
Achatinella	lila	2011	2011-03-08	2006-12-02 19:12:00	2006	15.36	NonKeiki	0.37	4.26356	10.37	Population 5	2010-12-01 19:12:00	Mature	F2
Achatinella	lila	2011	2011-03-16	2005-12-14 09:36:00	2005	16.75	NonKeiki	1.76	5.2537	10.43	Population 2	2009-12-13 09:36:00	Mature	F2
Achatinella	lila	2011	2011-03-31	2005-06-30 09:36:00	2005	17.45	NonKeiki	2.46	5.75233	11.15	Population 1	2009-06-29 09:36:00	Mature	F2
Achatinella	lila	2011	2011-04-05	2005-05-11 19:12:00	2005	17.66	NonKeiki	2.67	5.90192	10.6	Population 9	2009-05-10 19:12:00	Mature	F2
Achatinella	lila	2011	2011-04-29	2006-02-14 14:24:00	2006	16.68	NonKeiki	1.69	5.20384	9.6	Population 8	2010-02-13 14:24:00	Mature	F2
Achatinella	lila	2011	2011-05-11	2006-02-08 09:36:00	2006	16.75	NonKeiki	1.76	5.2537	10.66	Population 8	2010-02-07 09:36:00	Mature	F2
Achatinella	lila	2011	2011-05-12	2005-02-15 14:24:00	2005	18.13	NonKeiki	3.14	6.23671	10.7	Supplement	2009-02-14 14:24:00	Mature	F2
Achatinella	lila	2011	2011-06-09	2006-10-16 09:36:00	2006	15.9	NonKeiki	0.91	4.64822	9.46	Population 4	2010-10-15 09:36:00	Mature	F2
Achatinella	lila	2011	2011-07-05	2005-05-14 09:36:00	2005	18	NonKeiki	3.01	6.14411	11.03	Supplement	2009-05-13 09:36:00	Mature	F2
Achatinella	lila	2011	2011-07-06	2007-01-03 09:36:00	2007	15.7	NonKeiki	0.71	4.50575	10.19	Population 2	2011-01-02 09:36:00	Mature	F2
Achatinella	lila	2011	2011-08-02	2004-12-24 09:36:00	2004	18.65	NonKeiki	3.66	6.60712	10.48	Supplement	2008-12-23 09:36:00	Mature	F2
Achatinella	lila	2011	2011-08-04	2006-08-11 04:48:00	2006	16.37	NonKeiki	1.38	4.98301	9.92	Population 6	2010-08-10 04:48:00	Mature	F2
Achatinella	lila	2011	2011-08-04	2006-10-20 09:36:00	2006	16.1	NonKeiki	1.11	4.79068	10.09	Population 6	2010-10-19 09:36:00	Mature	F2
Achatinella	lila	2011	2011-08-17	2005-04-17 04:48:00	2005	18.27	NonKeiki	3.28	6.33644	11.59	Supplement	2009-04-16 04:48:00	Mature	F2
Achatinella	lila	2011	2011-08-26	2005-09-21 09:36:00	2005	17.7	NonKeiki	2.71	5.93041	11.97	Population 5	2009-09-20 09:36:00	Mature	F2
Achatinella	lila	2011	2011-09-08	2005-07-18 09:36:00	2005	18	NonKeiki	3.01	6.14411	11.37	Population 8	2009-07-17 09:36:00	Mature	F2
Achatinella	lila	2011	2011-09-08	2005-11-02	2005	17.59	NonKeiki	2.6	5.85205	11.83	Population 8	2009-11-01	Mature	F2
Achatinella	lila	2011	2011-09-08	2006-09-10	2006	16.39	NonKeiki	1.4	4.99726	11.38	Population 8	2010-09-09	Mature	F2
Achatinella	lila	2011	2011-09-22	2006-11-28	2006	16.14	NonKeiki	1.15	4.81918	11.55	Population 4	2010-11-27	Mature	F2
Achatinella	lila	2011	2011-09-30	2006-01-30 14:24:00	2006	17.33	NonKeiki	2.34	5.66685	11.31	Population 4	2010-01-29 14:24:00	Mature	F2
Achatinella	lila	2011	2011-10-28	2006-11-01 14:24:00	2006	16.38	NonKeiki	1.39	4.99014	9.5	Population 4	2010-10-31 14:24:00	Mature	F2
Achatinella	lila	2011	2011-10-28	2007-02-03 04:48:00	2007	16.02	NonKeiki	1.03	4.7337	10.72	Population 7	2011-02-02 04:48:00	Mature	F2
Achatinella	lila	2011	2011-11-10	2005-07-29 09:36:00	2005	18.2	NonKeiki	3.21	6.28658	10.8	Population 3	2009-07-28 09:36:00	Mature	F2
Achatinella	lila	2011	2011-11-23	2007-03-11 14:24:00	2007	15.98	NonKeiki	0.99	4.70521	11.93	Population 3	2011-03-10 14:24:00	Mature	F2
Achatinella	lila	2011	2011-11-28	2006-09-18 04:48:00	2006	16.67	NonKeiki	1.68	5.19671	11.17	Population 7	2010-09-17 04:48:00	Mature	F2
Achatinella	lila	2011	2011-11-28	2006-11-04	2006	16.49	NonKeiki	1.5	5.06849	11.37	Population 9	2010-11-03	Mature	F2
Achatinella	lila	2011	2011-11-28	2007-02-23 19:12:00	2007	16.06	NonKeiki	1.07	4.76219	11	Population 9	2011-02-22 19:12:00	Mature	F2
Achatinella	lila	2011	2011-12-12	2006-11-12 19:12:00	2006	16.51	NonKeiki	1.52	5.08274	10.08	Population 4	2010-11-11 19:12:00	Mature	F2
Achatinella	lila	2011	2011-12-13	2005-07-23 09:36:00	2005	18.35	NonKeiki	3.36	6.39342	11.79	Population 3	2009-07-22 09:36:00	Mature	F2
Achatinella	lila	2011	2011-12-13	2005-11-09 14:24:00	2005	17.93	NonKeiki	2.94	6.09425	11.39	Population 5	2009-11-08 14:24:00	Mature	F2
Achatinella	lila	2011	2011-12-13	2006-07-06 19:12:00	2006	17.01	NonKeiki	2.02	5.4389	11.84	Population 3	2010-07-05 19:12:00	Mature	F2
Achatinella	lila	2012	2012-01-04	2005-05-20 14:24:00	2005	18.68	NonKeiki	3.69	6.62849	11.94	Supplement	2009-05-19 14:24:00	Mature	F2
Achatinella	lila	2012	2012-01-04	2006-04-26 04:48:00	2006	17.37	NonKeiki	2.38	5.69534	11.85	Control	2010-04-25 04:48:00	Mature	F2
Achatinella	lila	2012	2012-01-25	2007-10-21 19:12:00	2007	15.36	NonKeiki	0.37	4.26356	9.91	Population 7	2011-10-20 19:12:00	Mature	F2
Achatinella	lila	2012	2012-02-03	2006-09-04 14:24:00	2006	16.98	NonKeiki	1.99	5.41753	12.63	Population 8	2010-09-03 14:24:00	Mature	F2
Achatinella	lila	2012	2012-02-12	2005-06-20 19:12:00	2005	18.71	NonKeiki	3.72	6.64986	11.16	Cuttle Bone 2	2009-06-19 19:12:00	Mature	F2
Achatinella	lila	2012	2012-02-17	2007-01-24	2007	16.49	NonKeiki	1.5	5.06849	9.5	Population 2	2011-01-23	Mature	F2
Achatinella	lila	2012	2012-02-19	2006-01-03 14:24:00	2006	17.98	NonKeiki	2.99	6.12986	12.57	Control 2	2010-01-02 14:24:00	Mature	F2
Achatinella	lila	2012	2012-02-19	2006-06-19	2006	17.34	NonKeiki	2.35	5.67397	10.75	Control 3	2010-06-18	Mature	F2
Achatinella	lila	2012	2012-02-19	2006-09-25 19:12:00	2006	16.96	NonKeiki	1.97	5.40329	11.31	Control 2	2010-09-24 19:12:00	Mature	F2
Achatinella	lila	2012	2012-02-21	2004-11-13	2004	19.59	NonKeiki	4.6	7.27671	11.58	Cuttle Bone 3	2008-11-12	Mature	F2
Achatinella	lila	2012	2012-02-21	2006-01-21 04:48:00	2006	17.92	NonKeiki	2.93	6.08712	11.41	Cuttle Bone 3	2010-01-20 04:48:00	Mature	F2
Achatinella	lila	2012	2012-02-21	2006-05-18 04:48:00	2006	17.47	NonKeiki	2.48	5.76658	12.42	Cuttle Bone 3	2010-05-17 04:48:00	Mature	F2
Achatinella	lila	2012	2012-02-21	2007-03-10 14:24:00	2007	16.33	NonKeiki	1.34	4.95452	10.58	Cuttle Bone 3	2011-03-09 14:24:00	Mature	F2
Achatinella	lila	2012	2012-02-21	2007-11-15 04:48:00	2007	15.37	NonKeiki	0.38	4.27068	12.06	Cuttle Bone 1	2011-11-14 04:48:00	Mature	F2
Achatinella	lila	2012	2012-02-23	2006-11-05 04:48:00	2006	16.82	NonKeiki	1.83	5.30356	10.08	Cuttle Bone 3	2010-11-04 04:48:00	Mature	F2
Achatinella	lila	2012	2012-02-29	2006-11-19	2006	16.79	NonKeiki	1.8	5.28219	11.26	Control 2	2010-11-18	Mature	F2
Achatinella	lila	2012	2012-03-02	2004-10-20 04:48:00	2004	19.72	NonKeiki	4.73	7.36932	14.18	Supplement	2008-10-19 04:48:00	Mature	F2
Achatinella	lila	2012	2012-03-02	2007-08-18 09:36:00	2007	15.75	NonKeiki	0.76	4.54137	9.98	Cuttle Bone 2	2011-08-17 09:36:00	Mature	F2
Achatinella	lila	2012	2012-03-14	2006-11-14 19:12:00	2006	16.86	NonKeiki	1.87	5.33205	10.34	Population 2	2010-11-13 19:12:00	Mature	F2
Achatinella	lila	2012	2012-03-14	2007-02-11 04:48:00	2007	16.52	NonKeiki	1.53	5.08986	10.3	Control 2	2011-02-10 04:48:00	Mature	F2
Achatinella	lila	2012	2012-03-28	2007-04-23 09:36:00	2007	16.3	NonKeiki	1.31	4.93315	10.57	Population 1	2011-04-22 09:36:00	Mature	F2
Achatinella	lila	2012	2012-03-29	2006-09-25 19:12:00	2006	17.11	NonKeiki	2.12	5.51014	10.49	Cuttle Bone 3	2010-09-24 19:12:00	Mature	F2
Achatinella	lila	2012	2012-03-29	2007-01-31 04:48:00	2007	16.62	NonKeiki	1.63	5.1611	10.4	Population 2	2011-01-30 04:48:00	Mature	F2
Achatinella	lila	2012	2012-03-29	2007-06-12 19:12:00	2007	16.11	NonKeiki	1.12	4.79781	10.47	Cuttle Bone 2	2011-06-11 19:12:00	Mature	F2
Achatinella	lila	2012	2012-03-29	2007-09-01 09:36:00	2007	15.8	NonKeiki	0.81	4.57699	9.31	Cuttle Bone 1	2011-08-31 09:36:00	Mature	F2
Achatinella	lila	2012	2012-04-09	2006-05-09	2006	17.69	NonKeiki	2.7	5.92329	11.23	Population 2	2010-05-08	Mature	F2
Achatinella	lila	2012	2012-04-11	2006-05-24	2006	17.64	NonKeiki	2.65	5.88767	10.3	Population 1	2010-05-23	Mature	F2
Achatinella	lila	2012	2012-04-11	2007-01-23 09:36:00	2007	16.7	NonKeiki	1.71	5.21808	9.83	Population 1	2011-01-22 09:36:00	Mature	F2
Achatinella	lila	2012	2012-04-11	2007-02-10 14:24:00	2007	16.63	NonKeiki	1.64	5.16822	9.77	Population 1	2011-02-09 14:24:00	Mature	F2
Achatinella	lila	2012	2012-04-14	2005-06-12 14:24:00	2005	18.98	NonKeiki	3.99	6.84219	11.96	Cuttle Bone 3	2009-06-11 14:24:00	Mature	F2
Achatinella	lila	2012	2012-04-14	2006-08-26	2006	17.29	NonKeiki	2.3	5.63836	12.06	Cuttle Bone 3	2010-08-25	Mature	F2
Achatinella	lila	2012	2012-04-20	2005-06-29	2005	18.94	NonKeiki	3.95	6.8137	11.22	Population 1	2009-06-28	Mature	F2
Achatinella	lila	2012	2012-04-20	2005-09-17 14:24:00	2005	18.63	NonKeiki	3.64	6.59288	11.31	Population 1	2009-09-16 14:24:00	Mature	F2
Achatinella	lila	2012	2012-04-20	2006-01-12 14:24:00	2006	18.18	NonKeiki	3.19	6.27233	11.13	Population 1	2010-01-11 14:24:00	Mature	F2
Achatinella	lila	2012	2012-04-20	2006-03-26 09:36:00	2006	17.9	NonKeiki	2.91	6.07288	10.91	Population 2	2010-03-25 09:36:00	Mature	F2
Achatinella	lila	2012	2012-04-20	2006-03-31 14:24:00	2006	17.88	NonKeiki	2.89	6.05863	10.46	Population 1	2010-03-30 14:24:00	Mature	F2
Achatinella	lila	2012	2012-04-20	2006-04-26 14:24:00	2006	17.78	NonKeiki	2.79	5.9874	10.85	Population 1	2010-04-25 14:24:00	Mature	F2
Achatinella	lila	2012	2012-04-20	2006-06-30 14:24:00	2006	17.53	NonKeiki	2.54	5.80932	11.83	Cuttle Bone 3	2010-06-29 14:24:00	Mature	F2
Achatinella	lila	2012	2012-04-20	2006-08-21 14:24:00	2006	17.33	NonKeiki	2.34	5.66685	11.93	Population 1	2010-08-20 14:24:00	Mature	F2
Achatinella	lila	2012	2012-04-20	2006-09-08 19:12:00	2006	17.26	NonKeiki	2.27	5.61699	10.73	Population 2	2010-09-07 19:12:00	Mature	F2
Achatinella	lila	2012	2012-04-20	2007-01-16 19:12:00	2007	16.76	NonKeiki	1.77	5.26082	10.23	Population 1	2011-01-15 19:12:00	Mature	F2
Achatinella	lila	2012	2012-04-20	2007-01-19 09:36:00	2007	16.75	NonKeiki	1.76	5.2537	10.64	Population 1	2011-01-18 09:36:00	Mature	F2
Achatinella	lila	2012	2012-04-20	2007-03-30 14:24:00	2007	16.48	NonKeiki	1.49	5.06137	10.83	Population 1	2011-03-29 14:24:00	Mature	F2
Achatinella	lila	2012	2012-04-20	2007-04-10	2007	16.44	NonKeiki	1.45	5.03288	10.54	Population 1	2011-04-09	Mature	F2
Achatinella	lila	2012	2012-04-20	2007-06-19 04:48:00	2007	16.17	NonKeiki	1.18	4.84055	9.2	Population 1	2011-06-18 04:48:00	Mature	F2
Achatinella	lila	2012	2012-04-20	2007-07-30 19:12:00	2007	16.01	NonKeiki	1.02	4.72658	10.02	Population 1	2011-07-29 19:12:00	Mature	F2
Achatinella	lila	2012	2012-04-20	2007-10-09	2007	15.74	NonKeiki	0.75	4.53425	9.95	Population 1	2011-10-08	Mature	F2
Achatinella	lila	2012	2012-04-20	2007-12-28 14:24:00	2007	15.43	NonKeiki	0.44	4.31342	11.01	Population 1	2011-12-27 14:24:00	Mature	F2
Achatinella	lila	2012	2012-04-20	2008-01-28 19:12:00	2008	15.31	NonKeiki	0.32	4.22795	10.8	Population 1	2012-01-27 19:12:00	Mature	F2
Achatinella	lila	2012	2012-04-20	2008-02-29	2008	15.19	NonKeiki	0.2	4.14247	10.41	Population 1	2012-02-28	Mature	F2
Achatinella	lila	2012	2012-04-25	2005-10-26 09:36:00	2005	18.5	NonKeiki	3.51	6.50027	11.38	Control 1	2009-10-25 09:36:00	Mature	F2
Achatinella	lila	2012	2012-04-27	2006-04-28 09:36:00	2006	17.8	NonKeiki	2.81	6.00164	10.46	Cuttle Bone 1	2010-04-27 09:36:00	Mature	F2
Achatinella	lila	2012	2012-04-27	2006-05-16 14:24:00	2006	17.73	NonKeiki	2.74	5.95178	11.21	Population 1	2010-05-15 14:24:00	Mature	F2
Achatinella	lila	2012	2012-04-27	2007-04-19 14:24:00	2007	16.43	NonKeiki	1.44	5.02575	11.18	Cuttle Bone 3	2011-04-18 14:24:00	Mature	F2
Achatinella	lila	2012	2012-04-27	2008-02-10	2008	15.29	NonKeiki	0.3	4.2137	11.59	Cuttle Bone 1	2012-02-09	Mature	F2
Achatinella	lila	2012	2012-05-08	2006-03-10 14:24:00	2006	18.03	NonKeiki	3.04	6.16548	9.74	Population 1	2010-03-09 14:24:00	Mature	F2
Achatinella	lila	2012	2012-05-08	2006-03-18 09:36:00	2006	18	NonKeiki	3.01	6.14411	10.88	Control 1	2010-03-17 09:36:00	Mature	F2
Achatinella	lila	2012	2012-05-08	2007-09-02 09:36:00	2007	15.95	NonKeiki	0.96	4.68384	11.13	Control 1	2011-09-01 09:36:00	Mature	F2
Achatinella	lila	2012	2012-05-09	2006-01-03	2006	18.29	NonKeiki	3.3	6.35068	11.62	Population 2	2010-01-02	Mature	F2
Achatinella	lila	2012	2012-05-09	2006-12-30 09:36:00	2006	16.9	NonKeiki	1.91	5.36055	11.3	Population 2	2010-12-29 09:36:00	Mature	F2
Achatinella	lila	2012	2012-05-09	2007-02-28 04:48:00	2007	16.67	NonKeiki	1.68	5.19671	10.43	Population 2	2011-02-27 04:48:00	Mature	F2
Achatinella	lila	2012	2012-05-14	2005-09-28 14:24:00	2005	18.68	NonKeiki	3.69	6.62849	10.33	Cuttle Bone 3	2009-09-27 14:24:00	Mature	F2
Achatinella	lila	2012	2012-05-14	2005-11-19 14:24:00	2005	18.48	NonKeiki	3.49	6.48603	11.46	Cuttle Bone 2	2009-11-18 14:24:00	Mature	F2
Achatinella	lila	2012	2012-05-14	2006-10-28 19:12:00	2006	17.16	NonKeiki	2.17	5.54575	9.63	Cuttle Bone 3	2010-10-27 19:12:00	Mature	F2
Achatinella	lila	2012	2012-05-14	2006-10-28 19:12:00	2006	17.16	NonKeiki	2.17	5.54575	9.81	Cuttle Bone 3	2010-10-27 19:12:00	Mature	F2
Achatinella	lila	2012	2012-05-14	2006-11-29	2006	17.04	NonKeiki	2.05	5.46027	11.04	Cuttle Bone 1	2010-11-28	Mature	F2
Achatinella	lila	2012	2012-05-14	2006-12-17 04:48:00	2006	16.97	NonKeiki	1.98	5.41041	11.27	Cuttle Bone 2	2010-12-16 04:48:00	Mature	F2
Achatinella	lila	2012	2012-05-22	2006-02-16 04:48:00	2006	18.17	NonKeiki	3.18	6.26521	10.3	Control 2	2010-02-15 04:48:00	Mature	F2
Achatinella	lila	2012	2012-05-23	2006-02-22 09:36:00	2006	18.15	NonKeiki	3.16	6.25096	10.11	Population 2	2010-02-21 09:36:00	Mature	F2
Achatinella	lila	2012	2012-05-23	2006-04-25 19:12:00	2006	17.91	NonKeiki	2.92	6.08	10.21	Control 1	2010-04-24 19:12:00	Mature	F2
Achatinella	lila	2012	2012-05-23	2006-05-27	2006	17.79	NonKeiki	2.8	5.99452	9.63	Population 2	2010-05-26	Mature	F2
Achatinella	lila	2012	2012-05-23	2007-08-06 19:12:00	2007	16.11	NonKeiki	1.12	4.79781	10.44	Population 2	2011-08-05 19:12:00	Mature	F2
Achatinella	lila	2012	2012-06-05	2006-09-15 19:12:00	2006	17.41	NonKeiki	2.42	5.72384	9.55	Population 2	2010-09-14 19:12:00	Mature	F2
Achatinella	lila	2012	2012-06-05	2008-03-12 04:48:00	2008	15.32	NonKeiki	0.33	4.23507	9.31	Population 1	2012-03-11 04:48:00	Mature	F2
Achatinella	lila	2012	2012-06-06	2006-06-10	2006	17.79	NonKeiki	2.8	5.99452	11.03	Control 2	2010-06-09	Mature	F2
Achatinella	lila	2012	2012-06-06	2006-11-10 09:36:00	2006	17.2	NonKeiki	2.21	5.57425	10.76	Control 2	2010-11-09 09:36:00	Mature	F2
Achatinella	lila	2012	2012-06-08	2006-12-24	2006	17.04	NonKeiki	2.05	5.46027	10.29	Population 2	2010-12-23	Mature	F2
Achatinella	lila	2012	2012-06-08	2007-10-26 19:12:00	2007	15.86	NonKeiki	0.87	4.61973	10.07	Cuttle Bone 1	2011-10-25 19:12:00	Mature	F2
Achatinella	lila	2012	2012-06-20	2006-09-25 14:24:00	2006	17.43	NonKeiki	2.44	5.73808	10.54	Population 2	2010-09-24 14:24:00	Mature	F2
Achatinella	lila	2012	2012-06-20	2006-09-25 14:24:00	2006	17.43	NonKeiki	2.44	5.73808	10.63	Population 2	2010-09-24 14:24:00	Mature	F2
Achatinella	lila	2012	2012-06-20	2007-02-10 09:36:00	2007	16.9	NonKeiki	1.91	5.36055	11.28	Population 2	2011-02-09 09:36:00	Mature	F2
Achatinella	lila	2012	2012-06-21	2007-07-17 09:36:00	2007	16.3	NonKeiki	1.31	4.93315	10.78	Cuttle Bone 1	2011-07-16 09:36:00	Mature	F2
Achatinella	lila	2012	2012-06-25	2006-05-23 14:24:00	2006	17.93	NonKeiki	2.94	6.09425	11.15	Population 1	2010-05-22 14:24:00	Mature	F2
Achatinella	lila	2012	2012-06-25	2007-07-24	2007	16.29	NonKeiki	1.3	4.92603	10.01	Population 1	2011-07-23	Mature	F2
Achatinella	lila	2012	2012-07-05	2007-05-09 04:48:00	2007	16.62	NonKeiki	1.63	5.1611	10.33	Control 2	2011-05-08 04:48:00	Mature	F2
Achatinella	lila	2012	2012-07-06	2006-08-23 04:48:00	2006	17.62	NonKeiki	2.63	5.87342	9.54	CaCO3 1	2010-08-22 04:48:00	Mature	F2
Achatinella	lila	2012	2012-07-06	2007-09-14 14:24:00	2007	16.13	NonKeiki	1.14	4.81205	9.82	CaCO3 1	2011-09-13 14:24:00	Mature	F2
Achatinella	lila	2012	2012-07-09	2006-11-04 09:36:00	2006	17.35	NonKeiki	2.36	5.6811	9.66	CaCO3 2	2010-11-03 09:36:00	Mature	F2
Achatinella	lila	2012	2012-07-12	2007-11-14 04:48:00	2007	15.92	NonKeiki	0.93	4.66247	10.69	Cuttlebone 2	2011-11-13 04:48:00	Mature	F2
Achatinella	lila	2012	2012-07-13	2005-12-05 09:36:00	2005	18.65	NonKeiki	3.66	6.60712	10.88	Control 2	2009-12-04 09:36:00	Mature	F2
Achatinella	lila	2012	2012-07-13	2006-02-26 14:24:00	2006	18.33	NonKeiki	3.34	6.37918	11.2	Control 2	2010-02-25 14:24:00	Mature	F2
Achatinella	lila	2012	2012-07-13	2007-04-16	2007	16.74	NonKeiki	1.75	5.24658	11.28	Population 2	2011-04-15	Mature	F2
Achatinella	lila	2012	2012-07-19	2007-04-24 14:24:00	2007	16.73	NonKeiki	1.74	5.23945	10.74	Population 1	2011-04-23 14:24:00	Mature	F2
Achatinella	lila	2012	2012-07-20	2007-01-14 04:48:00	2007	17.12	NonKeiki	2.13	5.51726	9.89	Control 2	2011-01-13 04:48:00	Mature	F2
Achatinella	lila	2012	2012-07-20	2007-10-14 04:48:00	2007	16.07	NonKeiki	1.08	4.76932	9.5	Control 2	2011-10-13 04:48:00	Mature	F2
Achatinella	lila	2012	2012-07-27	2007-06-15 19:12:00	2007	16.56	NonKeiki	1.57	5.11836	11.07	Cuttle Bone 2	2011-06-14 19:12:00	Mature	F2
Achatinella	lila	2012	2012-07-27	2007-12-27 19:12:00	2007	15.81	NonKeiki	0.82	4.58411	9.81	Cuttle Bone 2	2011-12-26 19:12:00	Mature	F2
Achatinella	lila	2012	2012-07-28	2006-09-14 04:48:00	2006	17.62	NonKeiki	2.63	5.87342	10.24	Cuttle Bone 1	2010-09-13 04:48:00	Mature	F2
Achatinella	lila	2012	2012-08-07	2006-09-29 09:36:00	2006	17.6	NonKeiki	2.61	5.85918	10.52	Population 1	2010-09-28 09:36:00	Mature	F2
Achatinella	lila	2012	2012-08-07	2008-02-05 09:36:00	2008	15.7	NonKeiki	0.71	4.50575	9.1	Population 2	2012-02-04 09:36:00	Mature	F2
Achatinella	lila	2012	2012-08-08	2008-01-21 19:12:00	2008	15.76	NonKeiki	0.77	4.54849	11.63	Population 2	2012-01-20 19:12:00	Mature	F2
Achatinella	lila	2012	2012-08-09	2005-11-23 09:36:00	2005	18.8	NonKeiki	3.81	6.71397	12.29	Control 2	2009-11-22 09:36:00	Mature	F2
Achatinella	lila	2012	2012-08-10	2007-09-02 19:12:00	2007	16.31	NonKeiki	1.32	4.94027	10.85	Cuttle Bone 1	2011-09-01 19:12:00	Mature	F2
Achatinella	lila	2012	2012-08-16	2006-07-09 09:36:00	2006	17.95	NonKeiki	2.96	6.10849	10.96	Population 2	2010-07-08 09:36:00	Mature	F2
Achatinella	lila	2012	2012-08-16	2007-09-24 09:36:00	2007	16.25	NonKeiki	1.26	4.89753	9.77	Population 2	2011-09-23 09:36:00	Mature	F2
Achatinella	lila	2012	2012-08-16	2007-12-01	2007	15.99	NonKeiki	1	4.71233	9.77	Population 2	2011-11-30	Mature	F2
Achatinella	lila	2012	2012-08-16	2008-07-24 14:24:00	2008	15.08	NonKeiki	0.09	4.06411	9.6	Population 2	2012-07-23 14:24:00	Mature	F2
Achatinella	lila	2012	2012-08-17	2006-09-18 14:24:00	2006	17.68	NonKeiki	2.69	5.91616	9.95	Cuttle Bone 1	2010-09-17 14:24:00	Mature	F2
Achatinella	lila	2012	2012-08-18	2007-06-01 09:36:00	2007	16.7	NonKeiki	1.71	5.21808	10.53	Cuttle Bone 3	2011-05-31 09:36:00	Mature	F2
Achatinella	lila	2012	2012-08-20	2007-10-16 14:24:00	2007	16.18	NonKeiki	1.19	4.84767	10.44	Population 2	2011-10-15 14:24:00	Mature	F2
Achatinella	lila	2012	2012-08-24	2005-11-17 14:24:00	2005	18.88	NonKeiki	3.89	6.77096	11.67	Population 1	2009-11-16 14:24:00	Mature	F2
Achatinella	lila	2012	2012-08-27	2006-12-26	2006	17.34	NonKeiki	2.35	5.67397	10.69	Cuttle Bone 2	2010-12-25	Mature	F2
Achatinella	lila	2012	2012-08-27	2007-05-28 09:36:00	2007	16.75	NonKeiki	1.76	5.2537	10.32	Cuttle Bone 1	2011-05-27 09:36:00	Mature	F2
Achatinella	lila	2012	2012-08-27	2008-01-14 19:12:00	2008	15.86	NonKeiki	0.87	4.61973	11.04	Control 3	2012-01-13 19:12:00	Mature	F2
Achatinella	lila	2012	2012-09-02	2005-08-09 09:36:00	2005	19.3	NonKeiki	4.31	7.07014	10.81	Population 1	2009-08-08 09:36:00	Mature	F2
Achatinella	lila	2012	2012-09-03	2006-02-21 09:36:00	2006	18.55	NonKeiki	3.56	6.53589	11.49	Cuttle Bone 1	2010-02-20 09:36:00	Mature	F2
Achatinella	lila	2012	2012-09-03	2006-04-14 09:36:00	2006	18.35	NonKeiki	3.36	6.39342	10.7	Cuttle Bone 1	2010-04-13 09:36:00	Mature	F2
Achatinella	lila	2012	2012-09-14	2006-08-15 04:48:00	2006	17.92	NonKeiki	2.93	6.08712	9.86	Population 1	2010-08-14 04:48:00	Mature	F2
Achatinella	lila	2012	2012-09-16	2006-10-31 14:24:00	2006	17.63	NonKeiki	2.64	5.88055	9.71	Cuttle Bone 1	2010-10-30 14:24:00	Mature	F2
Achatinella	lila	2012	2012-09-21	2006-09-09 09:36:00	2006	17.85	NonKeiki	2.86	6.03726	10.02	Population 2	2010-09-08 09:36:00	Mature	F2
Achatinella	lila	2012	2012-09-25	2006-07-26	2006	18.04	NonKeiki	3.05	6.1726	9.82	Control 3	2010-07-25	Mature	F2
Achatinella	lila	2012	2012-09-25	2007-07-04 04:48:00	2007	16.72	NonKeiki	1.73	5.23233	10.64	Control 3	2011-07-03 04:48:00	Mature	F2
Achatinella	lila	2012	2012-09-25	2007-10-21 09:36:00	2007	16.3	NonKeiki	1.31	4.93315	9.8	Control 3	2011-10-20 09:36:00	Mature	F2
Achatinella	lila	2012	2012-09-25	2008-05-03 09:36:00	2008	15.55	NonKeiki	0.56	4.3989	9.42	Control 3	2012-05-02 09:36:00	Mature	F2
Achatinella	lila	2012	2012-09-26	2006-12-06 14:24:00	2006	17.53	NonKeiki	2.54	5.80932	9.94	Cuttle Bone 1	2010-12-05 14:24:00	Mature	F2
Achatinella	lila	2012	2012-09-26	2007-04-05 04:48:00	2007	17.07	NonKeiki	2.08	5.48164	9.48	Cuttle Bone 1	2011-04-04 04:48:00	Mature	F2
Achatinella	lila	2012	2012-09-26	2007-11-17 09:36:00	2007	16.2	NonKeiki	1.21	4.86192	10.08	Cuttle Bone 1	2011-11-16 09:36:00	Mature	F2
Achatinella	lila	2012	2012-09-26	2008-01-08 09:36:00	2008	16	NonKeiki	1.01	4.71945	9.35	Cuttle Bone 1	2012-01-07 09:36:00	Mature	F2
Achatinella	lila	2012	2012-09-28	2006-06-04 09:36:00	2006	18.25	NonKeiki	3.26	6.32219	10.47	CaCO3 2	2010-06-03 09:36:00	Mature	F2
Achatinella	lila	2012	2012-09-28	2007-05-24	2007	16.89	NonKeiki	1.9	5.35342	10.26	CaCO3 2	2011-05-23	Mature	F2
Achatinella	lila	2012	2012-09-28	2007-09-18	2007	16.44	NonKeiki	1.45	5.03288	9.75	CaCO3 2	2011-09-17	Mature	F2
Achatinella	lila	2012	2012-09-28	2007-11-27 04:48:00	2007	16.17	NonKeiki	1.18	4.84055	9.25	CaCO3 2	2011-11-26 04:48:00	Mature	F2
Achatinella	lila	2012	2012-10-05	2007-07-14 04:48:00	2007	16.72	NonKeiki	1.73	5.23233	9.91	Population 1	2011-07-13 04:48:00	Mature	F2
Achatinella	lila	2012	2012-10-05	2007-09-12	2007	16.49	NonKeiki	1.5	5.06849	9.94	Population 2	2011-09-11	Mature	F2
Achatinella	lila	2012	2012-10-09	2007-01-17 04:48:00	2007	17.42	NonKeiki	2.43	5.73096	9.45	Cuttlebone 1	2011-01-16 04:48:00	Mature	F2
Achatinella	lila	2012	2012-10-09	2007-07-10 09:36:00	2007	16.75	NonKeiki	1.76	5.2537	9.97	Cuttlebone 2	2011-07-09 09:36:00	Mature	F2
Achatinella	lila	2012	2012-10-09	2007-09-23 19:12:00	2007	16.46	NonKeiki	1.47	5.04712	9.78	Cuttlebone 1	2011-09-22 19:12:00	Mature	F2
Achatinella	lila	2012	2012-10-09	2007-12-31 14:24:00	2007	16.08	NonKeiki	1.09	4.77644	9.87	Control 3	2011-12-30 14:24:00	Mature	F2
Achatinella	lila	2012	2012-10-09	2008-06-22 19:12:00	2008	15.41	NonKeiki	0.42	4.29918	10.15	Control 3	2012-06-21 19:12:00	Mature	F2
Achatinella	lila	2012	2012-10-10	2008-03-24 19:12:00	2008	15.76	NonKeiki	0.77	4.54849	9.2	Cuttle Bone 2	2012-03-23 19:12:00	Mature	F2
Achatinella	lila	2012	2012-10-11	2006-11-30 19:12:00	2006	17.61	NonKeiki	2.62	5.8663	10.32	Cuttle Bone 2	2010-11-29 19:12:00	Mature	F2
Achatinella	lila	2012	2012-10-11	2007-08-23	2007	16.59	NonKeiki	1.6	5.13973	9.95	Cuttle Bone 2	2011-08-22	Mature	F2
Achatinella	lila	2012	2012-10-12	2007-03-28 19:12:00	2007	17.16	NonKeiki	2.17	5.54575	10.19	Cuttle Bone 3	2011-03-27 19:12:00	Mature	F2
Achatinella	lila	2012	2012-10-22	2008-08-03 09:36:00	2008	15.3	NonKeiki	0.31	4.22082	6.37	Control 2	2012-08-02 09:36:00	Mature	F3
Achatinella	lila	2012	2012-10-24	2006-06-07	2006	18.34	NonKeiki	3.35	6.3863	10.3	Cuttlebone 1	2010-06-06	Mature	F2
Achatinella	lila	2012	2012-10-24	2007-09-20 14:24:00	2007	16.53	NonKeiki	1.54	5.09699	10.21	Cuttlebone 1	2011-09-19 14:24:00	Mature	F2
Achatinella	lila	2012	2012-10-25	2007-01-20 04:48:00	2007	17.47	NonKeiki	2.48	5.76658	9.57	Cuttllebone 2	2011-01-19 04:48:00	Mature	F2
Achatinella	lila	2012	2012-10-25	2008-02-01 04:48:00	2008	16.02	NonKeiki	1.03	4.7337	10.01	Cuttle Bone 1	2012-01-31 04:48:00	Mature	F2
Achatinella	lila	2012	2012-10-26	2007-08-04 04:48:00	2007	16.72	NonKeiki	1.73	5.23233	10.12	CaCO3 2	2011-08-03 04:48:00	Mature	F2
Achatinella	lila	2012	2012-11-05	2007-04-29 14:24:00	2007	17.13	NonKeiki	2.14	5.52438	10.38	Control 1	2011-04-28 14:24:00	Mature	F2
Achatinella	lila	2012	2012-11-07	2007-03-13 04:48:00	2007	17.32	NonKeiki	2.33	5.65973	9.87	Cuttlebone 2	2011-03-12 04:48:00	Mature	F2
Achatinella	lila	2012	2012-11-08	2007-03-06 09:36:00	2007	17.35	NonKeiki	2.36	5.6811	10.5	CaCO3 2	2011-03-05 09:36:00	Mature	F2
Achatinella	lila	2012	2012-11-09	2007-04-20 14:24:00	2007	17.18	NonKeiki	2.19	5.56	9.93	CaCO3 3	2011-04-19 14:24:00	Mature	F2
Achatinella	lila	2012	2012-11-09	2008-03-18 09:36:00	2008	15.9	NonKeiki	0.91	4.64822	9.23	CaCO3 3	2012-03-17 09:36:00	Mature	F2
Achatinella	lila	2012	2012-11-09	2008-04-29	2008	15.74	NonKeiki	0.75	4.53425	10.04	CaCO3 3	2012-04-28	Mature	F2
Achatinella	lila	2012	2012-11-09	2008-05-01 14:24:00	2008	15.73	NonKeiki	0.74	4.52712	10.02	CaCO3 3	2012-04-30 14:24:00	Mature	F2
Achatinella	lila	2012	2012-11-16	2005-09-27 09:36:00	2005	19.4	NonKeiki	4.41	7.14137	11	Population 1	2009-09-26 09:36:00	Mature	F2
Achatinella	lila	2012	2012-11-20	2007-07-31 14:24:00	2007	16.83	NonKeiki	1.84	5.31068	10.5	Control 1	2011-07-30 14:24:00	Mature	F2
Achatinella	lila	2012	2012-11-21	2006-12-18 09:36:00	2006	17.7	NonKeiki	2.71	5.93041	10.26	Cuttlebone 2	2010-12-17 09:36:00	Mature	F2
Achatinella	lila	2012	2012-11-21	2007-04-19 14:24:00	2007	17.23	NonKeiki	2.24	5.59562	9.94	Cuttlebone 2	2011-04-18 14:24:00	Mature	F2
Achatinella	lila	2012	2012-11-21	2007-11-29 04:48:00	2007	16.37	NonKeiki	1.38	4.98301	8.73	Control 3	2011-11-28 04:48:00	Mature	F2
Achatinella	lila	2012	2012-11-23	2007-06-02 04:48:00	2007	17.07	NonKeiki	2.08	5.48164	10.64	Cuttlebone 3	2011-06-01 04:48:00	Mature	F2
Achatinella	lila	2012	2012-12-05	2007-08-23 09:36:00	2007	16.8	NonKeiki	1.81	5.28932	9.68	Control 1	2011-08-22 09:36:00	Mature	F2
Achatinella	lila	2012	2012-12-06	2007-11-05 04:48:00	2007	16.52	NonKeiki	1.53	5.08986	9.39	Cuttlebone 3	2011-11-04 04:48:00	Mature	F2
Achatinella	lila	2012	2012-12-07	2006-01-14 19:12:00	2006	19.06	NonKeiki	4.07	6.89918	10.34	CaCO3 3	2010-01-13 19:12:00	Mature	F2
Achatinella	lila	2012	2012-12-07	2006-07-26 04:48:00	2006	18.32	NonKeiki	3.33	6.37205	11.62	Control 3	2010-07-25 04:48:00	Mature	F2
Achatinella	lila	2012	2012-12-07	2008-09-08	2008	15.34	NonKeiki	0.35	4.24932	10.31	CaCO3 3	2012-09-07	Mature	F3
Achatinella	lila	2012	2012-12-09	2007-11-26 09:36:00	2007	16.45	NonKeiki	1.46	5.04	9.28	CaCO3 1	2011-11-25 09:36:00	Mature	F2
Achatinella	lila	2012	2012-12-10	2005-06-26 09:36:00	2005	19.85	NonKeiki	4.86	7.46192	10.06	Cuttlebone 3	2009-06-25 09:36:00	Mature	F2
Achatinella	lila	2012	2012-12-17	2006-03-28 04:48:00	2006	18.82	NonKeiki	3.83	6.72822	9.42	Population 1	2010-03-27 04:48:00	Mature	F2
Achatinella	lila	2012	2012-12-19	2008-06-13 04:48:00	2008	15.72	NonKeiki	0.73	4.52	9.83	Control 3	2012-06-12 04:48:00	Mature	F2
Achatinella	lila	2012	2012-12-20	2006-10-04 09:36:00	2006	18.1	NonKeiki	3.11	6.21534	9.74		2010-10-03 09:36:00	Mature	F2
Achatinella	lila	2012	2012-12-20	2006-11-20 04:48:00	2006	17.92	NonKeiki	2.93	6.08712	10.29	Cuttlebone 3	2010-11-19 04:48:00	Mature	F2
Achatinella	lila	2012	2012-12-20	2008-03-25 14:24:00	2008	16.03	NonKeiki	1.04	4.74082	10.95	Control 3	2012-03-24 14:24:00	Mature	F2
Achatinella	lila	2012	2012-12-21	2007-08-29	2007	16.84	NonKeiki	1.85	5.31781	8.54	Cuttlebone 2	2011-08-28	Mature	F2
Achatinella	lila	2012	2012-12-21	2007-11-25 09:36:00	2007	16.5	NonKeiki	1.51	5.07562	9.26	Cuttlebone 3	2011-11-24 09:36:00	Mature	F2
Achatinella	lila	2012	2012-12-26	2007-09-21 04:48:00	2007	16.77	NonKeiki	1.78	5.26795	9.41	Control 1	2011-09-20 04:48:00	Mature	F2
Achatinella	lila	2013	2013-01-02	2006-08-13 09:36:00	2006	18.35	NonKeiki	3.36	6.39342	11.88	CaCO3 3	2010-08-12 09:36:00	Mature	F2
Achatinella	lila	2013	2013-01-10	2008-08-21	2008	15.54	NonKeiki	0.55	4.39178	9.29	Cuttlebone 3	2012-08-20	Mature	F3
Achatinella	lila	2013	2013-01-11	2008-04-14	2008	16.04	NonKeiki	1.05	4.74795	9.39	Population 1	2012-04-13	Mature	F2
Achatinella	lila	2013	2013-01-14	2005-09-05 19:12:00	2005	19.71	NonKeiki	4.72	7.36219	11.14	Control 1	2009-09-04 19:12:00	Mature	F2
Achatinella	lila	2013	2013-01-14	2006-07-25 04:48:00	2006	18.47	NonKeiki	3.48	6.4789	10.72	Control 2	2010-07-24 04:48:00	Mature	F2
Achatinella	lila	2013	2013-01-15	2006-10-17 09:36:00	2006	18.15	NonKeiki	3.16	6.25096	9.99	Control 3	2010-10-16 09:36:00	Mature	F2
Achatinella	lila	2013	2013-01-15	2008-03-30 19:12:00	2008	16.11	NonKeiki	1.12	4.79781	9.98	Cuttlebone 2	2012-03-29 19:12:00	Mature	F2
Achatinella	lila	2013	2013-01-25	2007-10-31 14:24:00	2007	16.73	NonKeiki	1.74	5.23945	11.47	Population 2	2011-10-30 14:24:00	Mature	F2
Achatinella	lila	2013	2013-02-11	2007-06-19 19:12:00	2007	17.31	NonKeiki	2.32	5.6526	9.31	Control 1	2011-06-18 19:12:00	Mature	F2
Achatinella	lila	2013	2013-02-26	2007-12-26	2007	16.64	NonKeiki	1.65	5.17534	10.53	Control 3	2011-12-25	Mature	F2
Achatinella	lila	2013	2013-02-26	2007-12-26	2007	16.64	NonKeiki	1.65	5.17534	10.53	Control 3	2011-12-25	Mature	F2
Achatinella	lila	2013	2013-02-27	2008-08-22 04:48:00	2008	15.72	NonKeiki	0.73	4.52	9.99	Cuttlebone 1	2012-08-21 04:48:00	Mature	F3
Achatinella	lila	2013	2013-03-12	2008-04-19 09:36:00	2008	16.25	NonKeiki	1.26	4.89753	10.07	Cuttlebone 1	2012-04-18 09:36:00	Mature	F2
Achatinella	lila	2013	2013-04-11	2008-11-07	2008	15.59	NonKeiki	0.6	4.4274	9.18	CaCO3 1	2012-11-06	Mature	F3
Achatinella	lila	2013	2013-05-10	2008-04-13 09:36:00	2008	16.5	NonKeiki	1.51	5.07562	9.95	Cuttlebone 2	2012-04-12 09:36:00	Mature	F2
Achatinella	lila	2013	2013-06-07	2007-01-16 09:36:00	2007	18.35	NonKeiki	3.36	6.39342	10.19	CaCO3 2	2011-01-15 09:36:00	Mature	F2
Achatinella	lila	2013	2013-06-07	2007-10-21 14:24:00	2007	17.28	NonKeiki	2.29	5.63123	10.51	CaCO3 2	2011-10-20 14:24:00	Mature	F2
Achatinella	lila	2013	2013-07-08	2008-07-17 19:12:00	2008	16.36	NonKeiki	1.37	4.97589	9.68	Pop 9	2012-07-16 19:12:00	Mature	F2
Achatinella	lila	2013	2013-07-08	2008-09-10 09:36:00	2008	16.15	NonKeiki	1.16	4.8263	8.94	Pop 8	2012-09-09 09:36:00	Mature	F3
Achatinella	lila	2013	2013-07-08	2008-10-11 14:24:00	2008	16.03	NonKeiki	1.04	4.74082	10.39	Pop 9	2012-10-10 14:24:00	Mature	F3
Achatinella	lila	2013	2013-07-17	2007-02-04 14:24:00	2007	18.43	NonKeiki	3.44	6.45041	11.32	Pop 6	2011-02-03 14:24:00	Mature	F2
Achatinella	lila	2013	2013-07-22	2007-07-31 04:48:00	2007	17.77	NonKeiki	2.78	5.98027	10.15	Pop 8	2011-07-30 04:48:00	Mature	F2
Achatinella	lila	2013	2013-07-22	2008-03-21 04:48:00	2008	16.87	NonKeiki	1.88	5.33918	9.55	Pop 8	2012-03-20 04:48:00	Mature	F2
Achatinella	lila	2013	2013-07-30	2008-02-27	2008	16.99	NonKeiki	2	5.42466	9.63	Pop 6	2012-02-26	Mature	F2
Achatinella	lila	2013	2013-07-31	2008-05-26 09:36:00	2008	16.65	NonKeiki	1.66	5.18247	10.28	Pop 7	2012-05-25 09:36:00	Mature	F2
Achatinella	lila	2013	2013-08-01	2008-02-18 14:24:00	2008	17.03	NonKeiki	2.04	5.45315	10.49	Pop 8	2012-02-17 14:24:00	Mature	F2
Achatinella	lila	2013	2013-08-13	2008-08-02	2008	16.44	NonKeiki	1.45	5.03288	9.4	Pop 4	2012-08-01	Mature	F3
Achatinella	lila	2013	2013-08-14	2007-10-22	2007	17.54	NonKeiki	2.55	5.81644	10.69	Pop 5	2011-10-21	Mature	F2
Achatinella	lila	2013	2013-08-16	2007-07-14 14:24:00	2007	17.93	NonKeiki	2.94	6.09425	10.29	Pop 9	2011-07-13 14:24:00	Mature	F2
Achatinella	lila	2013	2013-09-10	2005-12-03	2005	20.29	NonKeiki	5.3	7.77534	10.75	Pop 7	2009-12-02	Mature	F2
Achatinella	lila	2013	2013-09-10	2008-07-27 04:48:00	2008	16.57	NonKeiki	1.58	5.12548	9.26	Pop 5	2012-07-26 04:48:00	Mature	F2
Achatinella	lila	2013	2013-09-10	2008-08-04	2008	16.54	NonKeiki	1.55	5.10411	8.94	Pop 5	2012-08-03	Mature	F3
Achatinella	lila	2013	2013-10-08	2009-02-17	2009	15.89	NonKeiki	0.9	4.6411	9.31	Pop 5	2013-02-16	Mature	F3
Achatinella	lila	2013	2013-12-02	2009-08-31 09:36:00	2009	15.35	NonKeiki	0.36	4.25644	10.16	Pop 9	2013-08-30 09:36:00	Mature	F3
Achatinella	lila	2013	2013-12-19	2008-06-16 19:12:00	2008	17.11	NonKeiki	2.12	5.51014	9.35	Pop 5	2012-06-15 19:12:00	Mature	F2
Achatinella	lila	2014	2014-01-24	2008-06-03 09:36:00	2008	17.3	NonKeiki	2.31	5.64548	14.14	Pop 9	2012-06-02 09:36:00	Mature	F2
Achatinella	lila	2014	2014-02-05	2009-03-12 19:12:00	2009	16.26	NonKeiki	1.27	4.90466	10.52	Pop 6	2013-03-11 19:12:00	Mature	F3
Achatinella	lila	2014	2014-02-19	2009-11-08	2009	15.39	NonKeiki	0.4	4.28493	11.16	Pop 6	2013-11-07	Mature	F3
Achatinella	lila	2014	2014-03-04	2008-02-15 04:48:00	2008	17.87	NonKeiki	2.88	6.05151	12.36	Pop 7	2012-02-14 04:48:00	Mature	F2
Achatinella	lila	2014	2014-03-18	2007-10-14 09:36:00	2007	18.4	NonKeiki	3.41	6.42904	9.65	Pop 6	2011-10-13 09:36:00	Mature	F2
Achatinella	lila	2014	2014-03-18	2008-06-30 09:36:00	2008	17.4	NonKeiki	2.41	5.71671	9.5	Pop 7	2012-06-29 09:36:00	Mature	F2
Achatinella	lila	2014	2014-03-18	2008-07-08 04:48:00	2008	17.37	NonKeiki	2.38	5.69534	9.64	Pop 7	2012-07-07 04:48:00	Mature	F2
Achatinella	lila	2014	2014-03-18	2008-08-26 14:24:00	2008	17.18	NonKeiki	2.19	5.56	9.6	Pop 6	2012-08-25 14:24:00	Mature	F3
Achatinella	lila	2014	2014-06-11	2007-08-20	2007	18.94	NonKeiki	3.95	6.8137		Pop 3	2011-08-19	Mature	F2
Achatinella	lila	2014	2014-06-11	2007-09-25 09:36:00	2007	18.8	NonKeiki	3.81	6.71397		Pop 1	2011-09-24 09:36:00	Mature	F2
Achatinella	lila	2014	2014-06-11	2007-11-16 09:36:00	2007	18.6	NonKeiki	3.61	6.57151		Pop 6	2011-11-15 09:36:00	Mature	F2
Achatinella	lila	2014	2014-06-11	2007-12-12 09:36:00	2007	18.5	NonKeiki	3.51	6.50027		Pop 1	2011-12-11 09:36:00	Mature	F2
Achatinella	lila	2014	2014-06-11	2008-01-02 04:48:00	2008	18.42	NonKeiki	3.43	6.44329		Pop 3	2012-01-01 04:48:00	Mature	F2
Achatinella	lila	2014	2014-06-11	2008-02-28 09:36:00	2008	18.2	NonKeiki	3.21	6.28658		Pop 7	2012-02-27 09:36:00	Mature	F2
Achatinella	lila	2014	2014-06-11	2008-03-28	2008	18.09	NonKeiki	3.1	6.20822		Pop 3	2012-03-27	Mature	F2
Achatinella	lila	2014	2014-06-11	2008-04-20 09:36:00	2008	18	NonKeiki	3.01	6.14411		Pop 7	2012-04-19 09:36:00	Mature	F2
Achatinella	lila	2014	2014-06-11	2008-05-03 09:36:00	2008	17.95	NonKeiki	2.96	6.10849		Pop 3	2012-05-02 09:36:00	Mature	F2
Achatinella	lila	2014	2014-06-11	2008-05-16 09:36:00	2008	17.9	NonKeiki	2.91	6.07288		Pop 8	2012-05-15 09:36:00	Mature	F2
Achatinella	lila	2014	2014-06-11	2008-08-02 09:36:00	2008	17.6	NonKeiki	2.61	5.85918		Pop 9	2012-08-01 09:36:00	Mature	F3
Achatinella	lila	2014	2014-06-11	2008-08-28 09:36:00	2008	17.5	NonKeiki	2.51	5.78795		Pop 7	2012-08-27 09:36:00	Mature	F3
Achatinella	lila	2014	2014-06-11	2008-08-28 09:36:00	2008	17.5	NonKeiki	2.51	5.78795		Pop 1	2012-08-27 09:36:00	Mature	F3
Achatinella	lila	2014	2014-06-11	2008-08-28 09:36:00	2008	17.5	NonKeiki	2.51	5.78795		Pop 1	2012-08-27 09:36:00	Mature	F3
Achatinella	lila	2014	2014-06-11	2008-09-23 09:36:00	2008	17.4	NonKeiki	2.41	5.71671		Pop 4	2012-09-22 09:36:00	Mature	F3
Achatinella	lila	2014	2014-06-11	2008-09-23 09:36:00	2008	17.4	NonKeiki	2.41	5.71671		Pop 7	2012-09-22 09:36:00	Mature	F3
Achatinella	lila	2014	2014-06-11	2008-10-29 19:12:00	2008	17.26	NonKeiki	2.27	5.61699		Pop 3	2012-10-28 19:12:00	Mature	F3
Achatinella	lila	2014	2014-06-11	2008-11-14 09:36:00	2008	17.2	NonKeiki	2.21	5.57425		Pop 8	2012-11-13 09:36:00	Mature	F3
Achatinella	lila	2014	2014-06-11	2008-11-14 09:36:00	2008	17.2	NonKeiki	2.21	5.57425		Pop 9	2012-11-13 09:36:00	Mature	F3
Achatinella	lila	2014	2014-06-11	2008-12-10 09:36:00	2008	17.1	NonKeiki	2.11	5.50301		Pop 4	2012-12-09 09:36:00	Mature	F3
Achatinella	lila	2014	2014-06-11	2008-12-10 09:36:00	2008	17.1	NonKeiki	2.11	5.50301		Pop 7	2012-12-09 09:36:00	Mature	F3
Achatinella	lila	2014	2014-06-11	2009-01-05 09:36:00	2009	17	NonKeiki	2.01	5.43178		Pop 9	2013-01-04 09:36:00	Mature	F3
Achatinella	lila	2014	2014-06-11	2009-01-31 09:36:00	2009	16.9	NonKeiki	1.91	5.36055		Pop 9	2013-01-30 09:36:00	Mature	F3
Achatinella	lila	2014	2014-06-11	2009-01-31 09:36:00	2009	16.9	NonKeiki	1.91	5.36055		Pop 9	2013-01-30 09:36:00	Mature	F3
Achatinella	lila	2014	2014-06-11	2009-03-11 09:36:00	2009	16.75	NonKeiki	1.76	5.2537		Pop 3	2013-03-10 09:36:00	Mature	F3
Achatinella	lila	2014	2014-06-11	2009-03-24 09:36:00	2009	16.7	NonKeiki	1.71	5.21808		Pop 3	2013-03-23 09:36:00	Mature	F3
Achatinella	lila	2014	2014-06-11	2009-03-24 09:36:00	2009	16.7	NonKeiki	1.71	5.21808		Pop 7	2013-03-23 09:36:00	Mature	F3
Achatinella	lila	2014	2014-06-11	2009-04-11 14:24:00	2009	16.63	NonKeiki	1.64	5.16822		Pop 3	2013-04-10 14:24:00	Mature	F3
Achatinella	lila	2014	2014-06-11	2009-04-19 09:36:00	2009	16.6	NonKeiki	1.61	5.14685		Pop 1	2013-04-18 09:36:00	Mature	F3
Achatinella	lila	2014	2014-06-11	2009-05-15 09:36:00	2009	16.5	NonKeiki	1.51	5.07562		Pop 4	2013-05-14 09:36:00	Mature	F3
Achatinella	lila	2014	2014-06-11	2009-05-23 04:48:00	2009	16.47	NonKeiki	1.48	5.05425		Pop 3	2013-05-22 04:48:00	Mature	F3
Achatinella	lila	2014	2014-06-11	2009-06-10 09:36:00	2009	16.4	NonKeiki	1.41	5.00438		Pop 6	2013-06-09 09:36:00	Mature	F3
Achatinella	lila	2014	2014-06-11	2009-06-28 14:24:00	2009	16.33	NonKeiki	1.34	4.95452		Pop 3	2013-06-27 14:24:00	Mature	F3
Achatinella	lila	2014	2014-06-11	2009-07-06 09:36:00	2009	16.3	NonKeiki	1.31	4.93315		Pop 6	2013-07-05 09:36:00	Mature	F3
Achatinella	lila	2014	2014-06-11	2009-08-01 09:36:00	2009	16.2	NonKeiki	1.21	4.86192		Pop 4	2013-07-31 09:36:00	Mature	F3
Achatinella	lila	2014	2014-06-11	2009-08-30	2009	16.09	NonKeiki	1.1	4.78356		Pop 3	2013-08-29	Mature	F3
Achatinella	lila	2014	2014-06-11	2009-09-14 14:24:00	2009	16.03	NonKeiki	1.04	4.74082		Pop 3	2013-09-13 14:24:00	Mature	F3
Achatinella	lila	2014	2014-06-11	2009-09-22 09:36:00	2009	16	NonKeiki	1.01	4.71945		Pop 3	2013-09-21 09:36:00	Mature	F3
Achatinella	lila	2014	2014-06-11	2009-11-13 09:36:00	2009	15.8	NonKeiki	0.81	4.57699		Pop 8	2013-11-12 09:36:00	Mature	F3
Achatinella	lila	2014	2014-06-11	2009-11-13 09:36:00	2009	15.8	NonKeiki	0.81	4.57699		Pop 8	2013-11-12 09:36:00	Mature	F3
Achatinella	lila	2014	2014-06-11	2009-12-19 19:12:00	2009	15.66	NonKeiki	0.67	4.47726		Pop 3	2013-12-18 19:12:00	Mature	F3
Achatinella	lila	2014	2014-06-11	2009-12-19 19:12:00	2009	15.66	NonKeiki	0.67	4.47726		Pop 3	2013-12-18 19:12:00	Mature	F3
Achatinella	lila	2014	2014-06-11	2009-12-25	2009	15.64	NonKeiki	0.65	4.46301		Pop 3	2013-12-24	Mature	F3
Achatinella	lila	2014	2014-06-11	2010-01-30 09:36:00	2010	15.5	NonKeiki	0.51	4.36329		Pop 8	2014-01-29 09:36:00	Mature	F3
Achatinella	lila	2014	2014-06-11	2010-02-12 09:36:00	2010	15.45	NonKeiki	0.46	4.32767		Pop 3	2014-02-11 09:36:00	Mature	F3
Achatinella	lila	2014	2014-06-11	2010-03-23 09:36:00	2010	15.3	NonKeiki	0.31	4.22082		Pop 9	2014-03-22 09:36:00	Mature	F3
Achatinella	lila	2014	2014-06-11	2010-03-23 09:36:00	2010	15.3	NonKeiki	0.31	4.22082		Pop 9	2014-03-22 09:36:00	Mature	F3
Achatinella	lila	2014	2014-06-11	2010-04-08	2010	15.24	NonKeiki	0.25	4.17808		Pop 3	2014-04-07	Mature	F3
Achatinella	lila	2014	2014-06-11	2010-04-18 09:36:00	2010	15.2	NonKeiki	0.21	4.14959		Pop 9	2014-04-17 09:36:00	Mature	F3
Achatinella	lila	2014	2014-06-11	2010-06-09 09:36:00	2010	15	NonKeiki	0.01	4.00712		Pop 4	2014-06-08 09:36:00	Mature	F3
Achatinella	lila	1998	1998-03-03	1994-06-22 16:48:00	1994	14.6	NonKeiki	5.1	3.69671	10.2		1998-06-21 16:48:00	Not Mature	FOUNDER
Achatinella	lila	2000	2000-05-08	2000-03-30 18:21:10	2000	3.65	Keiki	0.65	0.104754			2004-03-29 18:21:10	Not Mature	F1
Achatinella	lila	2000	2000-09-12	2000-09-12	2000	1.85	Keiki		0			2004-09-11	Not Mature	F1
Achatinella	lila	2000	2000-10-10	2000-09-28 05:38:49	2000	3.2	Keiki	0.2	0.0322321			2004-09-27 05:38:49	Not Mature	F1
Achatinella	lila	2000	2000-11-08	2000-11-08	2000	2.15	Keiki		0			2004-11-07	Not Mature	F1
Achatinella	lila	2000	2000-12-06	2000-12-06	2000	2.9	Keiki		0			2004-12-05	Not Mature	F1
Achatinella	lila	2001	2001-09-13	1997-12-14 09:36:00	1997	14.7	NonKeiki	5.2	3.74959	9.2		2001-12-13 09:36:00	Not Mature	F1
Achatinella	lila	2001	2001-09-27	2001-08-10 22:35:17	2001	3.8	Keiki	0.8	0.128928	3.05	Adults	2005-08-09 22:35:17	Not Mature	F1
Achatinella	lila	2001	2001-11-20	2001-10-09 19:45:52	2001	3.7	Keiki	0.7	0.112812		Adults	2005-10-08 19:45:52	Not Mature	F1
Achatinella	lila	2001	2001-11-20	2001-11-20	2001	2.75	Keiki		0		Adults	2005-11-19	Not Mature	F1
Achatinella	lila	2001	2001-12-31	2001-08-05 22:35:17	2001	5.5	Keiki	2.5	0.402901	5.05	keiki 2	2005-08-04 22:35:17	Not Mature	F1
Achatinella	lila	2002	2002-01-30	2001-07-01 01:24:42	2001	6.62	Keiki	3.62	0.5834	5.62	keiki 2	2005-06-30 01:24:42	Not Mature	F1
Achatinella	lila	2002	2002-02-01	2001-11-13 14:07:03	2001	4.35	Keiki	1.35	0.217566	4.1	Adults	2005-11-12 14:07:03	Not Mature	F1
Achatinella	lila	2002	2002-02-01	2001-11-25 08:28:14	2001	4.15	Keiki	1.15	0.185334	3.45	Adults	2005-11-24 08:28:14	Not Mature	F1
Achatinella	lila	2002	2002-02-01	2001-12-18 21:10:35	2001	3.75	Keiki	0.75	0.12087	3.55	Adults	2005-12-17 21:10:35	Not Mature	F1
Achatinella	lila	2002	2002-02-15	2001-10-17 09:52:56	2001	5.05	Keiki	2.05	0.330379	4.66	Adults	2005-10-16 09:52:56	Not Mature	F1
Achatinella	lila	2002	2002-02-15	2002-01-10 16:56:28	2002	3.6	Keiki	0.6	0.0966962	3.55	Adults	2006-01-09 16:56:28	Not Mature	F1
Achatinella	lila	2002	2002-02-27	1998-12-07 11:16:48	1998	13.71	NonKeiki	4.21	3.22611	9.71	keiki 2	2002-12-06 11:16:48	Not Mature	F1
Achatinella	lila	2002	2002-02-27	2001-06-14 08:28:14	2001	7.38	Keiki	4.38	0.705882	6.02	keiki 2	2005-06-13 08:28:14	Not Mature	F1
Achatinella	lila	2002	2002-03-01	2001-10-25 12:42:21	2001	5.15	Keiki	2.15	0.346495	4.73	Adults	2005-10-24 12:42:21	Not Mature	F1
Achatinella	lila	2002	2002-03-12	2001-04-01 21:10:35	2001	8.85	Keiki	5.85	0.942788		keiki 2	2005-03-31 21:10:35	Not Mature	F1
Achatinella	lila	2002	2002-03-26	1998-10-10 13:12:00	1998	14.15	NonKeiki	4.65	3.45877	9.54	keiki 2	2002-10-09 13:12:00	Not Mature	F1
Achatinella	lila	2002	2002-03-26	2000-12-19 12:00:00	2000	10	NonKeiki	0.5	1.26438	7.4	keiki 2	2004-12-18 12:00:00	Not Mature	F1
Achatinella	lila	2002	2002-03-27	2002-02-20 21:10:35	2002	3.58	Keiki	0.58	0.093473	3.44	Adults	2006-02-19 21:10:35	Not Mature	F1
Achatinella	lila	2002	2002-04-26	2001-09-08 14:07:03	2001	6.9	Keiki	3.9	0.628525	5.85	keiki	2005-09-07 14:07:03	Not Mature	F1
Achatinella	lila	2002	2002-04-26	2001-09-14 11:17:38	2001	6.8	Keiki	3.8	0.612409	5.34	keiki	2005-09-13 11:17:38	Not Mature	F1
Achatinella	lila	2002	2002-05-10	2002-03-03 08:28:14	2002	4.15	Keiki	1.15	0.185334	4.2	Adults	2006-03-02 08:28:14	Not Mature	F1
Achatinella	lila	2002	2002-05-10	2002-03-06 07:03:31	2002	4.1	Keiki	1.1	0.177276	4.1	Adults	2006-03-05 07:03:31	Not Mature	F1
Achatinella	lila	2002	2002-05-10	2002-03-09 05:38:49	2002	4.05	Keiki	1.05	0.169218	3.4	Adults	2006-03-08 05:38:49	Not Mature	F1
Achatinella	lila	2002	2002-05-10	2002-05-04 02:49:24	2002	3.1	Keiki	0.1	0.016116	3.35	Adults	2006-05-03 02:49:24	Not Mature	F1
Achatinella	lila	2002	2002-05-20	1998-07-16 15:50:24	1998	14.88	NonKeiki	5.38	3.84477	10.53	keiki 2	2002-07-15 15:50:24	Not Mature	F1
Achatinella	lila	2002	2002-06-04	2000-02-19 01:55:12	2000	11.94	NonKeiki	2.44	2.29019	9.26	keiki 2	2004-02-18 01:55:12	Not Mature	F1
Achatinella	lila	2002	2002-06-04	2001-08-07 09:52:56	2001	8.11	Keiki	5.11	0.823529	6.04	keiki 2	2005-08-06 09:52:56	Not Mature	F1
Achatinella	lila	2002	2002-06-07	2002-03-10 04:14:07	2002	4.51	Keiki	1.51	0.243352	4.02	Adults	2006-03-09 04:14:07	Not Mature	F1
Achatinella	lila	2002	2002-06-07	2002-05-02 16:56:28	2002	3.6	Keiki	0.6	0.0966962	3.22	Adults	2006-05-01 16:56:28	Not Mature	F1
Achatinella	lila	2002	2002-06-19	2001-11-01 14:07:03	2001	6.9	Keiki	3.9	0.628525	5.7	Adults	2005-10-31 14:07:03	Not Mature	F1
Achatinella	lila	2002	2002-06-19	2002-04-02 22:35:17	2002	4.31	Keiki	1.31	0.21112	4.04	Adults	2006-04-01 22:35:17	Not Mature	F1
Achatinella	lila	2002	2002-07-03	2001-08-29 22:35:17	2001	8.22	Keiki	5.22	0.841257	6.25	Adults	2005-08-28 22:35:17	Not Mature	F1
Achatinella	lila	2002	2002-08-02	2002-03-25	2002	5.21	Keiki	2.21	0.356164	4.66	Adults	2006-03-24	Not Mature	F1
Achatinella	lila	2002	2002-08-15	2000-02-11 22:48:00	2000	12.35	NonKeiki	2.85	2.50699	8.4	keiki 2	2004-02-10 22:48:00	Not Mature	F1
Achatinella	lila	2002	2002-08-15	2001-11-10 22:35:17	2001	7.71	Keiki	4.71	0.759065	6.15	Adults	2005-11-09 22:35:17	Not Mature	F1
Achatinella	lila	2002	2002-08-15	2002-02-13 01:24:42	2002	6.11	Keiki	3.11	0.501209	5.09	Adults	2006-02-12 01:24:42	Not Mature	F1
Achatinella	lila	2002	2002-08-15	2002-04-12 21:10:35	2002	5.11	Keiki	2.11	0.340048	4.76	Adults	2006-04-11 21:10:35	Not Mature	F1
Achatinella	lila	2002	2002-08-15	2002-04-29 08:28:14	2002	4.83	Keiki	1.83	0.294923	4.35	Adults	2006-04-28 08:28:14	Not Mature	F1
Achatinella	lila	2002	2002-08-15	2002-06-21 21:10:35	2002	3.92	Keiki	0.92	0.148268	3.2	Adults	2006-06-20 21:10:35	Not Mature	F1
Achatinella	lila	2002	2002-08-16	2002-06-08 18:21:10	2002	4.16	Keiki	1.16	0.186946	4.16	Adults	2006-06-07 18:21:10	Not Mature	F1
Achatinella	lila	2002	2002-08-16	2002-08-16	2002	2.74	Keiki		0	2.45	Adults	2006-08-15	Not Mature	F1
Achatinella	lila	2002	2002-08-29	2002-07-18 19:45:52	2002	3.7	Keiki	0.7	0.112812	4.4	Adults	2006-07-17 19:45:52	Not Mature	F1
Achatinella	lila	2002	2002-08-29	2002-07-19 09:52:56	2002	3.69	Keiki	0.69	0.111201	2.87	Adults	2006-07-18 09:52:56	Not Mature	F1
Achatinella	lila	2002	2002-10-11	2001-11-07 08:28:14	2001	8.74	Keiki	5.74	0.92506	7.04	Adults	2005-11-06 08:28:14	Not Mature	F1
Achatinella	lila	2002	2002-10-11	2002-08-13 18:21:10	2002	3.99	Keiki	0.99	0.159549	4.38	Adults	2006-08-12 18:21:10	Not Mature	F1
Achatinella	lila	2002	2002-10-21	2002-06-04 18:21:10	2002	5.35	Keiki	2.35	0.378727	4.14		2006-06-03 18:21:10	Not Mature	F1
Achatinella	lila	2002	2002-10-21	2002-10-12 04:14:07	2002	3.15	Keiki	0.15	0.0241741	2.49		2006-10-11 04:14:07	Not Mature	F1
Achatinella	lila	2002	2002-10-23	2002-10-23	2002	2.74	Keiki		0	2.4	Adults	2006-10-22	Not Mature	F1
Achatinella	lila	2002	2002-11-04	2002-06-01 02:49:24	2002	5.65	Keiki	2.65	0.427075	4.95	Adults	2006-05-31 02:49:24	Not Mature	F1
Achatinella	lila	2002	2002-11-04	2002-08-10 16:56:28	2002	4.45	Keiki	1.45	0.233683	4.09	Adults	2006-08-09 16:56:28	Not Mature	F1
Achatinella	lila	2002	2002-11-06	2002-10-04 15:31:45	2002	3.55	Keiki	0.55	0.0886382	3.45	keiki 2	2006-10-03 15:31:45	Not Mature	F1
Achatinella	lila	2002	2002-11-19	2002-09-12 08:28:14	2002	4.15	Keiki	1.15	0.185334	3.7	Adults	2006-09-11 08:28:14	Not Mature	F1
Achatinella	lila	2002	2002-11-19	2002-10-24 16:56:28	2002	3.43	Keiki	0.43	0.069299	3.22	Adults	2006-10-23 16:56:28	Not Mature	F1
Achatinella	lila	2002	2002-12-03	2002-09-29 07:03:31	2002	4.1	Keiki	1.1	0.177276	3.38	Adults	2006-09-28 07:03:31	Not Mature	F1
Achatinella	lila	2002	2002-12-04	2002-09-10 07:03:31	2002	4.44	Keiki	1.44	0.232071	4.3	Adults	2006-09-09 07:03:31	Not Mature	F1
Achatinella	lila	2002	2002-12-29	2002-12-05 11:17:38	2002	3.4	Keiki	0.4	0.0644641	4.01	1A keiki	2006-12-04 11:17:38	Not Mature	F1
Achatinella	lila	2002	2002-12-30	2002-09-29 05:38:49	2002	4.56	Keiki	1.56	0.25141	3.82	Adults	2006-09-28 05:38:49	Not Mature	F1
Achatinella	lila	2002	2002-12-30	2002-10-23 08:28:14	2002	4.15	Keiki	1.15	0.185334	3.87	Adults	2006-10-22 08:28:14	Not Mature	F1
Achatinella	lila	2003	2003-01-13	2002-09-29 16:56:28	2002	4.79	Keiki	1.79	0.288477	4.05	Adults	2006-09-28 16:56:28	Not Mature	F1
Achatinella	lila	2003	2003-01-13	2002-11-06 22:35:17	2002	4.14	Keiki	1.14	0.183723	2.24	Adults	2006-11-05 22:35:17	Not Mature	F1
Achatinella	lila	2003	2003-02-10	2002-12-12 14:07:03	2002	4.01	Keiki	1.01	0.162772	3.75	Adults	2006-12-11 14:07:03	Not Mature	F1
Achatinella	lila	2003	2003-02-10	2003-01-13 22:35:17	2003	3.46	Keiki	0.46	0.0741338	3.89	Adults	2007-01-12 22:35:17	Not Mature	F2
Achatinella	lila	2003	2003-03-07	2002-04-14 12:42:21	2002	8.55	Keiki	5.55	0.89444	7.45	Adults	2006-04-13 12:42:21	Not Mature	F1
Achatinella	lila	2003	2003-03-07	2002-12-29 08:28:14	2002	4.15	Keiki	1.15	0.185334	4.22	Adults	2006-12-28 08:28:14	Not Mature	F1
Achatinella	lila	2003	2003-04-15	2003-01-07 22:35:17	2003	4.65	Keiki	1.65	0.265915	4.7	Adults	2007-01-06 22:35:17	Not Mature	F2
Achatinella	lila	2003	2003-06-26	2003-06-26	2003	1.86	Keiki		0	2.06	keiki 2	2007-06-25	Not Mature	F2
Achatinella	lila	2003	2003-07-10	2003-05-06 21:10:35	2003	4.09	Keiki	1.09	0.175665	2.95	Adults	2007-05-05 21:10:35	Not Mature	F2
Achatinella	lila	2003	2003-08-26	2003-08-04 19:45:52	2003	3.36	Keiki	0.36	0.0580177	2.75	Adults	2007-08-03 19:45:52	Not Mature	F2
Achatinella	lila	2003	2003-08-27	2003-03-26 11:17:38	2003	5.61	Keiki	2.61	0.420629	4.75	keiki 2	2007-03-25 11:17:38	Not Mature	F2
Achatinella	lila	2003	2003-09-23	2003-07-13 19:45:52	2003	4.21	Keiki	1.21	0.195004	4.95	keiki 2	2007-07-12 19:45:52	Not Mature	F2
Achatinella	lila	2003	2003-09-24	1999-12-15 18:00:00	1999	14.75	NonKeiki	5.25	3.77603	10.9	keiki	2003-12-14 18:00:00	Not Mature	F1
Achatinella	lila	2003	2003-09-24	2000-02-02	2000	14.5	NonKeiki	5	3.64384	11	keiki	2004-02-01	Not Mature	F1
Achatinella	lila	2003	2003-09-24	2000-02-23 05:31:12	2000	14.39	NonKeiki	4.89	3.58567	11.2	keiki	2004-02-22 05:31:12	Not Mature	F1
Achatinella	lila	2003	2003-09-24	2001-04-01 14:24:00	2001	12.3	NonKeiki	2.8	2.48055	7.9	keiki 3	2005-03-31 14:24:00	Not Mature	F1
Achatinella	lila	2003	2003-10-07	2003-02-19	2003	6.91	Keiki	3.91	0.630137	6.53	keiki 3	2007-02-18	Not Mature	F2
Achatinella	lila	2003	2003-11-03	2003-02-11 07:03:31	2003	7.5	Keiki	4.5	0.725222	6.2	keiki 2	2007-02-10 07:03:31	Not Mature	F2
Achatinella	lila	2003	2003-11-27	2003-06-24 02:49:24	2003	5.65	Keiki	2.65	0.427075	4.73	Adults	2007-06-23 02:49:24	Not Mature	F2
Achatinella	lila	2003	2003-11-27	2003-10-13 07:03:31	2003	3.76	Keiki	0.76	0.122482	3.55	Adults	2007-10-12 07:03:31	Not Mature	F2
Achatinella	lila	2003	2003-12-03	2003-07-20 02:49:24	2003	5.31	Keiki	2.31	0.37228	4.85	Adults	2007-07-19 02:49:24	Not Mature	F2
Achatinella	lila	2003	2003-12-03	2003-10-05 04:14:07	2003	4	Keiki	1	0.16116	4.25	Adults	2007-10-04 04:14:07	Not Mature	F2
Achatinella	lila	2003	2003-12-15	2003-12-09 02:49:24	2003	3.1	Keiki	0.1	0.016116	3	Adults	2007-12-08 02:49:24	Not Mature	F2
Achatinella	lila	2003	2003-12-15	2003-12-15	2003	2.8	Keiki		0	3.1	Adults	2007-12-14	Not Mature	F2
Achatinella	lila	2003	2003-12-16	2002-12-01 14:07:03	2002	9.45	Keiki	6.45	1.03948	7.6	keiki 3	2006-11-30 14:07:03	Not Mature	F1
Achatinella	lila	2003	2003-12-31	2003-12-07 11:17:38	2003	3.4	Keiki	0.4	0.0644641	2.5	Adults	2007-12-06 11:17:38	Not Mature	F2
Achatinella	lila	2004	2004-01-02	2002-11-20 12:57:36	2002	9.72	NonKeiki	0.22	1.11633	6.65	keiki 3	2006-11-19 12:57:36	Not Mature	F1
Achatinella	lila	2004	2004-01-02	2003-12-29 11:17:38	2003	3.06	Keiki	0.06	0.00966962	2.3	keiki 2	2007-12-28 11:17:38	Not Mature	F2
Achatinella	lila	2004	2004-01-30	2002-10-15 20:24:00	2002	10.05	NonKeiki	0.55	1.29082	7.6	keiki 5	2006-10-14 20:24:00	Not Mature	F1
Achatinella	lila	2004	2004-01-30	2003-03-24 05:38:49	2003	8.3	Keiki	5.3	0.85415	6.45	keiki 5	2007-03-23 05:38:49	Not Mature	F2
Achatinella	lila	2004	2004-01-30	2004-01-05 21:10:35	2004	3.41	Keiki	0.41	0.0660757	2.4	Adults	2008-01-04 21:10:35	Not Mature	F2
Achatinella	lila	2004	2004-02-10	2004-02-10	2004	2.8	Keiki		0	2.7	Adults	2008-02-09	Not Mature	F2
Achatinella	lila	2004	2004-02-12	2003-05-26 05:38:49	2003	7.45	Keiki	4.45	0.717164	3.32	keiki 5	2007-05-25 05:38:49	Not Mature	F2
Achatinella	lila	2004	2004-02-16	2004-02-16	2004	2.6	Keiki		0	2.1	Adults	2008-02-15	Not Mature	F2
Achatinella	lila	2004	2004-02-24	2001-10-19 20:24:00	2001	12.05	NonKeiki	2.55	2.34836	8.3	keiki 3	2005-10-18 20:24:00	Not Mature	F1
Achatinella	lila	2004	2004-02-24	2004-02-24	2004	2.5	Keiki		0	3.3	Adults	2008-02-23	Not Mature	F2
Achatinella	lila	2004	2004-03-08	2004-03-08	2004	2.58	Keiki		0		Adults	2008-03-07	Not Mature	F2
Achatinella	lila	2004	2004-04-24	2003-03-13 12:57:36	2003	9.72	NonKeiki	0.22	1.11633	7.41	keiki 5	2007-03-12 12:57:36	Not Mature	F2
Achatinella	lila	2004	2004-05-10	2003-12-09 01:24:42	2003	5.6	Keiki	2.6	0.419017	4.9	keiki 4	2007-12-08 01:24:42	Not Mature	F2
Achatinella	lila	2004	2004-05-10	2004-04-10 14:07:03	2004	3.5	Keiki	0.5	0.0805802	3.4	keiki 4	2008-04-09 14:07:03	Not Mature	F2
Achatinella	lila	2004	2004-05-19	2001-03-21 15:07:12	2001	13.59	NonKeiki	4.09	3.16266	8.61	keiki 3	2005-03-20 15:07:12	Not Mature	F1
Achatinella	lila	2004	2004-05-19	2001-07-13 12:00:00	2001	13	NonKeiki	3.5	2.85068	9.1	keiki	2005-07-12 12:00:00	Not Mature	F1
Achatinella	lila	2004	2004-06-04	2004-06-04	2004	3	Keiki	0	0	2.18	Adults	2008-06-03	Not Mature	F2
Achatinella	lila	2004	2004-06-15	2004-05-28 08:28:14	2004	3.3	Keiki	0.3	0.0483481	2.7	keiki	2008-05-27 08:28:14	Not Mature	F2
Achatinella	lila	2004	2004-06-15	2004-06-15	2004	2.6	Keiki		0	2.4	Adults	2008-06-14	Not Mature	F2
Achatinella	lila	2004	2004-07-02	2003-10-28 22:35:17	2003	7.2	Keiki	4.2	0.676873	5.4	keiki 4	2007-10-27 22:35:17	Not Mature	F2
Achatinella	lila	2004	2004-07-13	2004-07-07 02:49:24	2004	3.1	Keiki	0.1	0.016116	2.98	keiki 5	2008-07-06 02:49:24	Not Mature	F2
Achatinella	lila	2004	2004-07-14	2004-06-26 08:28:14	2004	3.3	Keiki	0.3	0.0483481	3.1	Adults	2008-06-25 08:28:14	Not Mature	F2
Achatinella	lila	2004	2004-07-17	2004-07-17	2004	2.9	Keiki		0	2.8	Adults	2008-07-16	Not Mature	F2
Achatinella	lila	2004	2004-07-27	2004-07-21 02:49:24	2004	3.1	Keiki	0.1	0.016116	3	Adults	2008-07-20 02:49:24	Not Mature	F2
Achatinella	lila	2004	2004-07-27	2004-07-27	2004	3	Keiki	0	0	2.9	keiki	2008-07-26	Not Mature	F2
Achatinella	lila	2004	2004-08-12	2004-05-12 19:45:52	2004	4.55	Keiki	1.55	0.249799	3.45	Adults	2008-05-11 19:45:52	Not Mature	F2
Achatinella	lila	2004	2004-08-12	2004-08-07 21:10:35	2004	3.07	Keiki	0.07	0.0112812	2.3	Adults	2008-08-06 21:10:35	Not Mature	F2
Achatinella	lila	2004	2004-08-12	2004-08-12	2004	2.5	Keiki		0	1.69	Adults	2008-08-11	Not Mature	F2
Achatinella	lila	2004	2004-08-13	2004-08-01 05:38:49	2004	3.2	Keiki	0.2	0.0322321	2.6	keiki 2	2008-07-31 05:38:49	Not Mature	F2
Achatinella	lila	2004	2004-08-25	2004-08-25	2004	2.81	Keiki		0	2.2	Adults	2008-08-24	Not Mature	F2
Achatinella	lila	2004	2004-08-25	2004-08-25	2004	2.75	Keiki		0	2.41	keiki 2	2008-08-24	Not Mature	F2
Achatinella	lila	2004	2004-09-22	2003-11-07	2003	8.44	Keiki	5.44	0.876712	6.18	Adults	2007-11-06	Not Mature	F2
Achatinella	lila	2004	2004-09-22	2004-08-08 07:03:31	2004	3.76	Keiki	0.76	0.122482	2.8	Adults	2008-08-07 07:03:31	Not Mature	F2
Achatinella	lila	2004	2004-09-23	2004-09-23	2004	2.35	Keiki		0	1.71	keiki	2008-09-22	Not Mature	F2
Achatinella	lila	2004	2004-10-04	2000-12-29 14:38:24	2000	14.73	NonKeiki	5.23	3.76545	8.74	keiki 3	2004-12-28 14:38:24	Not Mature	F1
Achatinella	lila	2004	2004-10-08	2004-10-08	2004	2.8	Keiki		0	2.01	keiki 2	2008-10-07	Not Mature	F2
Achatinella	lila	2004	2004-10-08	2004-10-08	2004	2.31	Keiki		0	2.07	keiki 2	2008-10-07	Not Mature	F2
Achatinella	lila	2004	2004-10-21	2004-09-15 16:56:28	2004	3.6	Keiki	0.6	0.0966962	3.1	keiki 2	2008-09-14 16:56:28	Not Mature	F2
Achatinella	lila	2004	2004-11-04	2004-09-11 11:17:38	2004	3.91	Keiki	0.91	0.146656	3.21	keiki 2	2008-09-10 11:17:38	Not Mature	F2
Achatinella	lila	2004	2004-11-04	2004-11-04	2004	2.98	Keiki		0	2.18	keiki 2	2008-11-03	Not Mature	F2
Achatinella	lila	2004	2004-12-02	2004-09-25 08:28:14	2004	4.15	Keiki	1.15	0.185334	3.6	keiki	2008-09-24 08:28:14	Not Mature	F2
Achatinella	lila	2004	2004-12-03	2004-10-31 01:24:42	2004	3.56	Keiki	0.56	0.0902498	2.66	keiki 2	2008-10-30 01:24:42	Not Mature	F2
Achatinella	lila	2004	2004-12-03	2004-11-20 15:31:45	2004	3.21	Keiki	0.21	0.0338437	2.5	keiki 2	2008-11-19 15:31:45	Not Mature	F2
Achatinella	lila	2004	2004-12-03	2004-12-03	2004	2.7	Keiki		0	2.15	keiki 2	2008-12-02	Not Mature	F2
Achatinella	lila	2004	2004-12-16	2004-10-29 08:28:14	2004	3.81	Keiki	0.81	0.13054	3.09	keiki	2008-10-28 08:28:14	Not Mature	F2
Achatinella	lila	2004	2004-12-16	2004-12-16	2004	2.45	Keiki		0	1.95	Adults	2008-12-15	Not Mature	F2
Achatinella	lila	2005	2005-01-26	2005-01-04 05:38:49	2005	3.37	Keiki	0.37	0.0596293	2.38	Adults	2009-01-03 05:38:49	Not Mature	F2
Achatinella	lila	2005	2005-01-26	2005-01-26	2005	2.91	Keiki		0	3.64	keiki 2	2009-01-25	Not Mature	F2
Achatinella	lila	2005	2005-02-09	2005-02-09	2005	2.45	Keiki		0	1.9	Adults	2009-02-08	Not Mature	F2
Achatinella	lila	2005	2005-02-10	2004-11-22	2004	4.36	Keiki	1.36	0.219178	3.65	keiki	2008-11-21	Not Mature	F2
Achatinella	lila	2005	2005-02-10	2004-12-13 04:14:07	2004	4	Keiki	1	0.16116	3.8	keiki 2	2008-12-12 04:14:07	Not Mature	F2
Achatinella	lila	2005	2005-02-10	2005-02-10	2005	2.74	Keiki		0	2.2	keiki 2	2009-02-09	Not Mature	F2
Achatinella	lila	2005	2005-02-10	2005-02-10	2005	2.3	Keiki		0	1.76	keiki 2	2009-02-09	Not Mature	F2
Achatinella	lila	2005	2005-02-24	2004-12-21 07:03:31	2004	4.1	Keiki	1.1	0.177276	3.42	keiki 2	2008-12-20 07:03:31	Not Mature	F2
Achatinella	lila	2005	2005-02-24	2005-02-20 11:17:38	2005	3.06	Keiki	0.06	0.00966962	2.12	keiki 2	2009-02-19 11:17:38	Not Mature	F2
Achatinella	lila	2005	2005-02-24	2005-02-24	2005	2.38	Keiki		0	1.98	keiki 2	2009-02-23	Not Mature	F2
Achatinella	lila	2005	2005-03-09	2001-09-25 11:31:12	2001	14.14	NonKeiki	4.64	3.45348	9.8	keiki 5	2005-09-24 11:31:12	Not Mature	F1
Achatinella	lila	2005	2005-03-09	2005-01-21 12:42:21	2005	3.79	Keiki	0.79	0.127317	3.05	keiki 2	2009-01-20 12:42:21	Not Mature	F2
Achatinella	lila	2005	2005-03-11	2002-08-11 22:19:12	2002	12.49	NonKeiki	2.99	2.58101	8.47	keiki 4	2006-08-10 22:19:12	Not Mature	F1
Achatinella	lila	2005	2005-03-24	2005-01-10 01:24:42	2005	4.24	Keiki	1.24	0.199839	3.2	keiki 3	2009-01-09 01:24:42	Not Mature	F2
Achatinella	lila	2005	2005-04-06	2005-04-06	2005	1.85	Keiki		0	1.44	Adults	2009-04-05	Not Mature	F2
Achatinella	lila	2005	2005-04-07	2004-12-05 15:31:45	2004	5.08	Keiki	2.08	0.335214	3.9	keiki 2	2008-12-04 15:31:45	Not Mature	F2
Achatinella	lila	2005	2005-04-07	2005-02-02 11:17:38	2005	4.08	Keiki	1.08	0.174053	2.84	keiki 2	2009-02-01 11:17:38	Not Mature	F2
Achatinella	lila	2005	2005-04-07	2005-02-20 02:49:24	2005	3.78	Keiki	0.78	0.125705	3	keiki 2	2009-02-19 02:49:24	Not Mature	F2
Achatinella	lila	2005	2005-04-07	2005-03-02 16:56:28	2005	3.6	Keiki	0.6	0.0966962	2.9	keiki 2	2009-03-01 16:56:28	Not Mature	F2
Achatinella	lila	2005	2005-04-07	2005-03-27 09:52:56	2005	3.18	Keiki	0.18	0.0290089	2.55	keiki	2009-03-26 09:52:56	Not Mature	F2
Achatinella	lila	2005	2005-04-19	2005-04-13 02:49:24	2005	3.1	Keiki	0.1	0.016116	2.5	keiki 3	2009-04-12 02:49:24	Not Mature	F2
Achatinella	lila	2005	2005-04-21	2005-01-12 18:21:10	2005	4.67	Keiki	1.67	0.269138	3	Adults	2009-01-11 18:21:10	Not Mature	F2
Achatinella	lila	2005	2005-04-21	2005-03-11 09:52:56	2005	3.69	Keiki	0.69	0.111201	2.4	Adults	2009-03-10 09:52:56	Not Mature	F2
Achatinella	lila	2005	2005-05-05	2005-03-22 11:17:38	2005	3.74	Keiki	0.74	0.119259	2.7	keiki 2	2009-03-21 11:17:38	Not Mature	F2
Achatinella	lila	2005	2005-05-05	2005-05-05	2005	2.4	Keiki		0	2.2	keiki 2	2009-05-04	Not Mature	F2
Achatinella	lila	2005	2005-05-05	2005-05-05	2005	2.16	Keiki		0	1.58	keiki 2	2009-05-04	Not Mature	F2
Achatinella	lila	2005	2005-05-22	2002-09-20 02:52:48	2002	12.66	NonKeiki	3.16	2.6709	8.14	keiki 2	2006-09-19 02:52:48	Not Mature	F1
Achatinella	lila	2005	2005-06-02	2005-04-07 16:56:28	2005	3.94	Keiki	0.94	0.151491	3.99	keiki 2	2009-04-06 16:56:28	Not Mature	F2
Achatinella	lila	2005	2005-06-15	2005-03-03 11:17:38	2005	4.76	Keiki	1.76	0.283642	3.26	keiki 5	2009-03-02 11:17:38	Not Mature	F2
Achatinella	lila	2005	2005-07-13	2005-07-13	2005	2.56	Keiki		0	2	Adults	2009-07-12	Not Mature	F2
Achatinella	lila	2005	2005-07-14	2002-07-11 14:24:00	2002	13.3	NonKeiki	3.8	3.00932	8.75	keiki 2	2006-07-10 14:24:00	Not Mature	F1
Achatinella	lila	2005	2005-07-25	2005-05-30 02:49:24	2005	3.95	Keiki	0.95	0.153102	2.85	keiki 3	2009-05-29 02:49:24	Not Mature	F2
Achatinella	lila	2005	2005-07-25	2005-07-22 01:24:42	2005	3.05	Keiki	0.05	0.00805802	2.5	keiki 3	2009-07-21 01:24:42	Not Mature	F2
Achatinella	lila	2005	2005-07-28	2005-07-28	2005	2.5	Keiki		0	2.05	keiki	2009-07-27	Not Mature	F2
Achatinella	lila	2005	2005-07-28	2005-07-28	2005	2.25	Keiki		0	2.6	keiki 2	2009-07-27	Not Mature	F2
Achatinella	lila	2005	2005-09-09	2003-12-04 03:36:00	2003	10.95	NonKeiki	1.45	1.76671	12.98	keiki 2	2007-12-03 03:36:00	Not Mature	F2
Achatinella	lila	2005	2005-09-09	2005-09-09	2005	2.8	Keiki		0	2.3	keiki 2	2009-09-08	Not Mature	F2
Achatinella	lila	2005	2005-09-19	2005-07-07 11:17:38	2005	4.25	Keiki	1.25	0.20145	3.44	keiki 3	2009-07-06 11:17:38	Not Mature	F2
Achatinella	lila	2005	2005-09-19	2005-07-31 14:07:03	2005	3.84	Keiki	0.84	0.135375	3.39	keiki 3	2009-07-30 14:07:03	Not Mature	F2
Achatinella	lila	2005	2005-09-19	2005-08-23 12:42:21	2005	3.45	Keiki	0.45	0.0725222	3.05	keiki 3	2009-08-22 12:42:21	Not Mature	F2
Achatinella	lila	2005	2005-09-22	2005-09-22	2005	2.16	Keiki		0	1.92	keiki 2	2009-09-21	Not Mature	F2
Achatinella	lila	2005	2005-10-02	2005-08-24 18:21:10	2005	3.65	Keiki	0.65	0.104754	2.9	keiki 2	2009-08-23 18:21:10	Not Mature	F2
Achatinella	lila	2005	2005-10-07	2005-09-16 09:52:56	2005	3.35	Keiki	0.35	0.0564061	2.57	Adults	2009-09-15 09:52:56	Not Mature	F2
Achatinella	lila	2005	2005-10-07	2005-09-25 19:45:52	2005	3.19	Keiki	0.19	0.0306205	2.4	keiki 2	2009-09-24 19:45:52	Not Mature	F2
Achatinella	lila	2005	2005-10-18	2005-07-05 07:03:31	2005	4.78	Keiki	1.78	0.286865	3.91	keiki 3	2009-07-04 07:03:31	Not Mature	F2
Achatinella	lila	2005	2005-10-18	2005-07-18 19:45:52	2005	4.55	Keiki	1.55	0.249799	3.35	keiki 3	2009-07-17 19:45:52	Not Mature	F2
Achatinella	lila	2005	2005-10-18	2005-07-24 16:56:28	2005	4.45	Keiki	1.45	0.233683	4.05	keiki 3	2009-07-23 16:56:28	Not Mature	F2
Achatinella	lila	2005	2005-10-18	2005-08-29	2005	3.85	Keiki	0.85	0.136986	2.66	keiki 3	2009-08-28	Not Mature	F2
Achatinella	lila	2005	2005-10-18	2005-08-30 04:14:07	2005	3.83	Keiki	0.83	0.133763	2.6	keiki 3	2009-08-29 04:14:07	Not Mature	F2
Achatinella	lila	2005	2005-10-19	2005-10-18 09:52:56	2005	3.01	Keiki	0.01	0.0016116	2.21	Adults	2009-10-17 09:52:56	Not Mature	F2
Achatinella	lila	2005	2005-10-20	2005-10-20	2005	2.5	Keiki		0	2.25	keiki 2	2009-10-19	Not Mature	F2
Achatinella	lila	2005	2005-11-04	2005-10-17 08:28:14	2005	3.3	Keiki	0.3	0.0483481	2.34	keiki 2	2009-10-16 08:28:14	Not Mature	F2
Achatinella	lila	2005	2005-11-11	2005-01-12 01:24:42	2005	8.15	Keiki	5.15	0.829976	3.6	keiki	2009-01-11 01:24:42	Not Mature	F2
Achatinella	lila	2005	2005-11-18	2005-11-18	2005	3	Keiki	0	0	2.38	keiki	2009-11-17	Not Mature	F2
Achatinella	lila	2005	2005-11-28	2005-11-28	2005	1.67	Keiki		0	1.15	keiki 3	2009-11-27	Not Mature	F2
Achatinella	lila	2006	2006-01-02	2005-12-30 01:24:42	2005	3.05	Keiki	0.05	0.00805802	2.79	keiki 4	2009-12-29 01:24:42	Not Mature	F2
Achatinella	lila	2006	2006-01-13	2006-01-13	2006	2.6	Keiki		0	2.58	keiki 5	2010-01-12	Not Mature	F2
Achatinella	lila	2006	2006-01-14	2002-08-19 20:24:00	2002	14.05	NonKeiki	4.55	3.40589	8.72	keiki 4	2006-08-18 20:24:00	Not Mature	F1
Achatinella	lila	2006	2006-01-24	2005-11-26 04:14:07	2005	4	Keiki	1	0.16116	3.18	keiki 3	2009-11-25 04:14:07	Not Mature	F2
Achatinella	lila	2006	2006-01-25	2006-01-25	2006	2.85	Keiki		0	2.1	keiki	2010-01-24	Not Mature	F2
Achatinella	lila	2006	2006-01-25	2006-01-25	2006	2.8	Keiki		0	2.71	keiki	2010-01-24	Not Mature	F2
Achatinella	lila	2006	2006-01-27	2006-01-27	2006	2.8	Keiki		0	2.2	keiki 5	2010-01-26	Not Mature	F2
Achatinella	lila	2006	2006-01-29	2002-10-25 23:02:24	2002	13.78	NonKeiki	4.28	3.26312	8.04	keiki 2	2006-10-24 23:02:24	Not Mature	F1
Achatinella	lila	2006	2006-01-29	2006-01-26 15:31:45	2006	3.04	Keiki	0.04	0.00644641	2.27	keiki 2	2010-01-25 15:31:45	Not Mature	F2
Achatinella	lila	2006	2006-02-10	2006-02-10	2006	2.7	Keiki		0	1.81	keiki 5	2010-02-09	Not Mature	F2
Achatinella	lila	2006	2006-02-21	2006-02-03 22:35:17	2006	3.29	Keiki	0.29	0.0467365	2.45	keiki	2010-02-02 22:35:17	Not Mature	F2
Achatinella	lila	2006	2006-02-27	2002-05-11 02:24:00	2002	14.8	NonKeiki	5.3	3.80247	8.9	keiki 2	2006-05-10 02:24:00	Not Mature	F1
Achatinella	lila	2006	2006-02-27	2005-11-27 19:45:52	2005	4.55	Keiki	1.55	0.249799	3.2	keiki 2	2009-11-26 19:45:52	Not Mature	F2
Achatinella	lila	2006	2006-02-27	2006-01-02 02:49:24	2006	3.95	Keiki	0.95	0.153102	2.5	keiki 2	2010-01-01 02:49:24	Not Mature	F2
Achatinella	lila	2006	2006-02-27	2006-01-19 18:21:10	2006	3.65	Keiki	0.65	0.104754	2.45	keiki 2	2010-01-18 18:21:10	Not Mature	F2
Achatinella	lila	2006	2006-02-27	2006-02-27	2006	1.95	Keiki		0	1.5	keiki 2	2010-02-26	Not Mature	F2
Achatinella	lila	2006	2006-03-07	2006-02-12 01:24:42	2006	3.39	Keiki	0.39	0.0628525	3.46	keiki 3	2010-02-11 01:24:42	Not Mature	F2
Achatinella	lila	2006	2006-03-27	2002-08-24 07:12:00	2002	14.4	NonKeiki	4.9	3.59096	8.5	keiki 2	2006-08-23 07:12:00	Not Mature	F1
Achatinella	lila	2006	2006-03-27	2003-12-29 10:48:00	2003	11.85	NonKeiki	2.35	2.2426	7.5	keiki 2	2007-12-28 10:48:00	Not Mature	F2
Achatinella	lila	2006	2006-03-27	2006-01-09 12:42:21	2006	4.3	Keiki	1.3	0.209508	2.8	keiki 2	2010-01-08 12:42:21	Not Mature	F2
Achatinella	lila	2006	2006-03-27	2006-03-27	2006	2.9	Keiki		0	2.2	keiki 2	2010-03-26	Not Mature	F2
Achatinella	lila	2006	2006-03-27	2006-03-27	2006	2.5	Keiki		0	1.9	keiki 2	2010-03-26	Not Mature	F2
Achatinella	lila	2006	2006-03-27	2006-03-27	2006	2.4	Keiki		0	1.8	keiki 2	2010-03-26	Not Mature	F2
Achatinella	lila	2006	2006-03-27	2006-03-27	2006	2.1	Keiki		0	1.8	keiki 2	2010-03-26	Not Mature	F2
Achatinella	lila	2006	2006-04-06	2006-04-05 09:52:56	2006	3.01	Keiki	0.01	0.0016116	2.41	keiki 5	2010-04-04 09:52:56	Not Mature	F2
Achatinella	lila	2006	2006-04-06	2006-04-06	2006	2.66	Keiki		0	1.76	keiki 5	2010-04-05	Not Mature	F2
Achatinella	lila	2006	2006-04-06	2006-04-06	2006	2.25	Keiki		0	1.94	keiki 5	2010-04-05	Not Mature	F2
Achatinella	lila	2006	2006-04-10	2005-12-01 14:07:03	2005	5.2	Keiki	2.2	0.354553	4.3	keiki 2	2009-11-30 14:07:03	Not Mature	F2
Achatinella	lila	2006	2006-04-19	2006-02-08	2006	4.19	Keiki	1.19	0.191781	3.9	Adults	2010-02-07	Not Mature	F2
Achatinella	lila	2006	2006-05-03	2006-05-03	2006	2.93	Keiki		0	2.4	keiki	2010-05-02	Not Mature	F2
Achatinella	lila	2006	2006-05-04	2006-05-04	2006	3	Keiki	0	0	2.54	keiki 5	2010-05-03	Not Mature	F2
Achatinella	lila	2006	2006-05-04	2006-05-04	2006	2.68	Keiki		0	1.85	keiki 5	2010-05-03	Not Mature	F2
Achatinella	lila	2006	2006-05-04	2006-05-04	2006	1.1	Keiki		0	1.7	keiki 5	2010-05-03	Not Mature	F2
Achatinella	lila	2006	2006-05-22	2005-11-30 15:31:45	2005	5.93	Keiki	2.93	0.4722	4.24	keiki 2	2009-11-29 15:31:45	Not Mature	F2
Achatinella	lila	2006	2006-05-22	2006-03-17 02:49:24	2006	4.12	Keiki	1.12	0.1805	3.15	keiki 2	2010-03-16 02:49:24	Not Mature	F2
Achatinella	lila	2006	2006-05-22	2006-03-30 01:24:42	2006	3.9	Keiki	0.9	0.145044	3.38	keiki 2	2010-03-29 01:24:42	Not Mature	F2
Achatinella	lila	2006	2006-05-22	2006-05-10 05:38:49	2006	3.2	Keiki	0.2	0.0322321	2.44	keiki 5	2010-05-09 05:38:49	Not Mature	F2
Achatinella	lila	2006	2006-05-31	2006-05-15 16:56:28	2006	3.26	Keiki	0.26	0.0419017	2.5	keiki 3	2010-05-14 16:56:28	Not Mature	F2
Achatinella	lila	2006	2006-06-01	2005-03-17 17:31:12	2005	9.89	NonKeiki	0.39	1.20622	7	keiki 5	2009-03-16 17:31:12	Not Mature	F2
Achatinella	lila	2006	2006-06-01	2006-02-15 16:56:28	2006	4.79	Keiki	1.79	0.288477	3.7	keiki 5	2010-02-14 16:56:28	Not Mature	F2
Achatinella	lila	2006	2006-07-02	2006-06-03 04:14:07	2006	3.49	Keiki	0.49	0.0789686	2.94	keiki 2	2010-06-02 04:14:07	Not Mature	F2
Achatinella	lila	2006	2006-07-10	2006-05-29 19:45:52	2006	3.7	Keiki	0.7	0.112812	2.7	keiki 2	2010-05-28 19:45:52	Not Mature	F2
Achatinella	lila	2006	2006-07-11	2004-01-29 04:19:12	2004	12.24	NonKeiki	2.74	2.44882	10.32	keiki 3	2008-01-28 04:19:12	Not Mature	F2
Achatinella	lila	2006	2006-07-17	2006-07-17	2006	2.9	Keiki		0	2.59	keiki 2	2010-07-16	Not Mature	F2
Achatinella	lila	2006	2006-07-24	2006-06-06 22:35:17	2006	3.8	Keiki	0.8	0.128928	3.2	keiki 3	2010-06-05 22:35:17	Not Mature	F2
Achatinella	lila	2006	2006-07-26	2006-07-26	2006	1.75	Keiki		0	1.95	Adults	2010-07-25	Not Mature	F2
Achatinella	lila	2006	2006-07-28	2003-04-29 18:00:00	2003	13.75	NonKeiki	4.25	3.24726	10.25	keiki 5	2007-04-28 18:00:00	Not Mature	F2
Achatinella	lila	2006	2006-08-08	2006-07-13 02:49:24	2006	3.44	Keiki	0.44	0.0709106	2.58	keiki 3	2010-07-12 02:49:24	Not Mature	F2
Achatinella	lila	2006	2006-08-09	2003-03-20 15:21:36	2003	14.02	NonKeiki	4.52	3.39003	8.6	Adults	2007-03-19 15:21:36	Not Mature	F2
Achatinella	lila	2006	2006-08-09	2006-07-01 18:21:10	2006	3.65	Keiki	0.65	0.104754	3.5	keiki	2010-06-30 18:21:10	Not Mature	F2
Achatinella	lila	2006	2006-08-10	2006-07-02 18:21:10	2006	3.65	Keiki	0.65	0.104754	3.7	keiki 5	2010-07-01 18:21:10	Not Mature	F2
Achatinella	lila	2006	2006-08-14	2006-07-21 11:17:38	2006	3.4	Keiki	0.4	0.0644641	3.25	keiki 2	2010-07-20 11:17:38	Not Mature	F2
Achatinella	lila	2006	2006-08-14	2006-08-14	2006	2.85	Keiki		0	3.15	keiki 2	2010-08-13	Not Mature	F2
Achatinella	lila	2006	2006-08-14	2006-08-14	2006	2.15	Keiki		0	2.2	keiki 2	2010-08-13	Not Mature	F2
Achatinella	lila	2006	2006-08-16	2006-02-11 16:56:28	2006	6.15	Keiki	3.15	0.507655	4.49	keiki	2010-02-10 16:56:28	Not Mature	F2
Achatinella	lila	2006	2006-08-24	2006-08-24	2006	2.95	Keiki		0	3	keiki 5	2010-08-23	Not Mature	F2
Achatinella	lila	2006	2006-08-28	2004-02-15 07:12:00	2004	12.4	NonKeiki	2.9	2.53342	8.9	keiki 2	2008-02-14 07:12:00	Not Mature	F2
Achatinella	lila	2006	2006-09-25	2006-06-19 22:35:17	2006	4.65	Keiki	1.65	0.265915	4.5	keiki 2	2010-06-18 22:35:17	Not Mature	F2
Achatinella	lila	2006	2006-09-25	2006-09-25	2006	2.5	Keiki		0	2.65	keiki 2	2010-09-24	Not Mature	F2
Achatinella	lila	2006	2006-10-03	2006-07-27 08:28:14	2006	4.15	Keiki	1.15	0.185334	4	keiki 3A	2010-07-26 08:28:14	Not Mature	F2
Achatinella	lila	2006	2006-10-03	2006-08-25 18:21:10	2006	3.65	Keiki	0.65	0.104754	3.7	keiki 3A	2010-08-24 18:21:10	Not Mature	F2
Achatinella	lila	2006	2006-10-03	2006-10-03	2006	2.4	Keiki		0	2.7	keiki 3	2010-10-02	Not Mature	F2
Achatinella	lila	2006	2006-10-10	2006-09-14 02:49:24	2006	3.44	Keiki	0.44	0.0709106	2.81	keiki 2	2010-09-13 02:49:24	Not Mature	F2
Achatinella	lila	2006	2006-10-23	2003-10-01 07:12:00	2003	13.4	NonKeiki	3.9	3.06219	11.05	keiki 2	2007-09-30 07:12:00	Not Mature	F2
Achatinella	lila	2006	2006-10-23	2004-08-24 09:36:00	2004	11.7	NonKeiki	2.2	2.16329	8.85	keiki 2	2008-08-23 09:36:00	Not Mature	F2
Achatinella	lila	2006	2006-11-06	2003-03-26 15:36:00	2003	14.45	NonKeiki	4.95	3.6174	9.03	keiki 2	2007-03-25 15:36:00	Not Mature	F2
Achatinella	lila	2006	2006-11-06	2003-04-01 10:33:36	2003	14.42	NonKeiki	4.92	3.60153	9.39	keiki 2	2007-03-31 10:33:36	Not Mature	F2
Achatinella	lila	2006	2006-11-15	2003-08-19 16:19:12	2003	13.74	NonKeiki	4.24	3.24197	9.9	Adults	2007-08-18 16:19:12	Not Mature	F2
Achatinella	lila	2006	2006-11-15	2006-09-17 04:14:07	2006	4	Keiki	1	0.16116	3.61	Adults	2010-09-16 04:14:07	Not Mature	F2
Achatinella	lila	2006	2006-11-15	2006-10-14 05:38:49	2006	3.54	Keiki	0.54	0.0870266	2.61	Adults	2010-10-13 05:38:49	Not Mature	F2
Achatinella	lila	2006	2006-11-15	2006-10-30 16:56:28	2006	3.26	Keiki	0.26	0.0419017	2.7	Adults	2010-10-29 16:56:28	Not Mature	F2
Achatinella	lila	2006	2006-11-17	2006-09-21 12:42:21	2006	3.96	Keiki	0.96	0.154714	2.37	keiki 5	2010-09-20 12:42:21	Not Mature	F2
Achatinella	lila	2006	2006-11-17	2006-10-10 22:35:17	2006	3.63	Keiki	0.63	0.101531	2.91	keiki 5	2010-10-09 22:35:17	Not Mature	F2
Achatinella	lila	2006	2006-11-20	2006-02-05 08:28:14	2006	7.89	Keiki	4.89	0.788074	6.06	keiki 2	2010-02-04 08:28:14	Not Mature	F2
Achatinella	lila	2006	2006-11-20	2006-06-28 07:03:31	2006	5.46	Keiki	2.46	0.396454	4.24	keiki 2	2010-06-27 07:03:31	Not Mature	F2
Achatinella	lila	2006	2006-11-28	2006-11-07 09:52:56	2006	3.35	Keiki	0.35	0.0564061	3.65	keiki 3	2010-11-06 09:52:56	Not Mature	F2
Achatinella	lila	2006	2006-12-01	2006-07-08 02:49:24	2006	5.48	Keiki	2.48	0.399678	4.45	keiki 5	2010-07-07 02:49:24	Not Mature	F2
Achatinella	lila	2006	2006-12-04	2006-09-06 18:21:10	2006	4.5	Keiki	1.5	0.241741	4.45	keiki 2	2010-09-05 18:21:10	Not Mature	F2
Achatinella	lila	2006	2006-12-04	2006-12-04	2006	2.1	Keiki		0	2.35	keiki 2	2010-12-03	Not Mature	F2
Achatinella	lila	2006	2006-12-15	2006-11-25	2006	3.34	Keiki	0.34	0.0547945	2.42	keiki	2010-11-24	Not Mature	F2
Achatinella	lila	2006	2006-12-18	2003-01-29 05:16:48	2003	14.96	NonKeiki	5.46	3.88707	9.56	keiki 2	2007-01-28 05:16:48	Not Mature	F2
Achatinella	lila	2006	2006-12-27	2006-12-27	2006	2.7	Keiki		0	2.7	keiki 3	2010-12-26	Not Mature	F2
Achatinella	lila	2006	2006-12-27	2006-12-27	2006	2.35	Keiki		0	2.35	keiki 3	2010-12-26	Not Mature	F2
Achatinella	lila	2006	2006-12-27	2006-12-27	2006	1.85	Keiki		0	1.6	keiki 3	2010-12-26	Not Mature	F2
Achatinella	lila	2006	2006-12-28	2003-06-09 19:26:24	2003	14.33	NonKeiki	4.83	3.55395	10.46	Adults	2007-06-08 19:26:24	Not Mature	F2
Achatinella	lila	2006	2006-12-28	2006-11-16 19:45:52	2006	3.7	Keiki	0.7	0.112812	3.45	keiki 5	2010-11-15 19:45:52	Not Mature	F2
Achatinella	lila	2006	2006-12-28	2006-12-04 11:17:38	2006	3.4	Keiki	0.4	0.0644641	3.35	keiki 5	2010-12-03 11:17:38	Not Mature	F2
Achatinella	lila	2006	2006-12-28	2006-12-07 09:52:56	2006	3.35	Keiki	0.35	0.0564061	3	keiki 5	2010-12-06 09:52:56	Not Mature	F2
Achatinella	lila	2006	2006-12-28	2006-12-07 09:52:56	2006	3.35	Keiki	0.35	0.0564061	3.1	keiki 5	2010-12-06 09:52:56	Not Mature	F2
Achatinella	lila	2007	2007-01-04	2006-10-25 09:52:56	2006	4.2	Keiki	1.2	0.193392	4	keiki 4	2010-10-24 09:52:56	Not Mature	F2
Achatinella	lila	2007	2007-01-04	2006-11-17 22:35:17	2006	3.8	Keiki	0.8	0.128928	3.85	keiki 4	2010-11-16 22:35:17	Not Mature	F2
Achatinella	lila	2007	2007-01-04	2006-12-02 15:31:45	2006	3.55	Keiki	0.55	0.0886382	3.4	keiki 4	2010-12-01 15:31:45	Not Mature	F2
Achatinella	lila	2007	2007-01-04	2006-12-02 15:31:45	2006	3.55	Keiki	0.55	0.0886382	3.3	keiki 4	2010-12-01 15:31:45	Not Mature	F2
Achatinella	lila	2007	2007-01-04	2006-12-08 12:42:21	2006	3.45	Keiki	0.45	0.0725222	3.4	keiki 4	2010-12-07 12:42:21	Not Mature	F2
Achatinella	lila	2007	2007-01-04	2006-12-11 11:17:38	2006	3.4	Keiki	0.4	0.0644641	3.4	keiki 4	2010-12-10 11:17:38	Not Mature	F2
Achatinella	lila	2007	2007-01-04	2006-12-14 09:52:56	2006	3.35	Keiki	0.35	0.0564061	3.2	keiki 4	2010-12-13 09:52:56	Not Mature	F2
Achatinella	lila	2007	2007-01-04	2006-12-17 08:28:14	2006	3.3	Keiki	0.3	0.0483481	3.2	keiki 4	2010-12-16 08:28:14	Not Mature	F2
Achatinella	lila	2007	2007-01-04	2006-12-26 04:14:07	2006	3.15	Keiki	0.15	0.0241741	3.05	keiki 4	2010-12-25 04:14:07	Not Mature	F2
Achatinella	lila	2007	2007-01-04	2007-01-04	2007	3	Keiki	0	0	2.85	keiki 4	2011-01-03	Not Mature	F2
Achatinella	lila	2007	2007-01-04	2007-01-04	2007	2.95	Keiki		0	2.8	keiki 4	2011-01-03	Not Mature	F2
Achatinella	lila	2007	2007-01-19	2007-01-10 04:14:07	2007	3.15	Keiki	0.15	0.0241741	2.6	keiki 4	2011-01-09 04:14:07	Not Mature	F2
Achatinella	lila	2007	2007-01-26	2007-01-23 01:24:42	2007	3.05	Keiki	0.05	0.00805802	2.48	keiki 5	2011-01-22 01:24:42	Not Mature	F2
Achatinella	lila	2007	2007-01-26	2007-01-26	2007	2.89	Keiki		0	2.25	keiki 5	2011-01-25	Not Mature	F2
Achatinella	lila	2007	2007-01-26	2007-01-26	2007	2.81	Keiki		0	2.32	keiki 5	2011-01-25	Not Mature	F2
Achatinella	lila	2007	2007-01-29	2003-11-08 11:16:48	2003	13.71	NonKeiki	4.21	3.22611	9.49	keiki 2	2007-11-07 11:16:48	Not Mature	F2
Achatinella	lila	2007	2007-01-31	2007-01-10 09:52:56	2007	3.35	Keiki	0.35	0.0564061	2.72	keiki 4	2011-01-09 09:52:56	Not Mature	F2
Achatinella	lila	2007	2007-01-31	2007-01-31	2007	2.69	Keiki		0	2.07	keiki 4	2011-01-30	Not Mature	F2
Achatinella	lila	2007	2007-02-02	2003-11-14 09:36:00	2003	13.7	NonKeiki	4.2	3.22082	9.33	keiki 2	2007-11-13 09:36:00	Not Mature	F2
Achatinella	lila	2007	2007-02-06	2006-08-04 16:56:28	2006	6.15	Keiki	3.15	0.507655	5	keiki 3	2010-08-03 16:56:28	Not Mature	F2
Achatinella	lila	2007	2007-02-08	2003-09-04 04:48:00	2003	14.1	NonKeiki	4.6	3.43233	9.4	Adults	2007-09-03 04:48:00	Not Mature	F2
Achatinella	lila	2007	2007-02-08	2003-09-21 13:40:48	2003	14.01	NonKeiki	4.51	3.38474	8.94	Adults	2007-09-20 13:40:48	Not Mature	F2
Achatinella	lila	2007	2007-02-12	2003-08-08 07:40:48	2003	14.26	NonKeiki	4.76	3.51693	9.54	keiki 2	2007-08-07 07:40:48	Not Mature	F2
Achatinella	lila	2007	2007-02-12	2003-08-29 13:12:00	2003	14.15	NonKeiki	4.65	3.45877	9.79	keiki 2	2007-08-28 13:12:00	Not Mature	F2
Achatinella	lila	2007	2007-02-12	2006-03-26 15:31:45	2006	8.48	Keiki	5.48	0.883159	5.99	keiki 2	2010-03-25 15:31:45	Not Mature	F2
Achatinella	lila	2007	2007-02-12	2006-11-27 12:42:21	2006	4.3	Keiki	1.3	0.209508	3.57	keiki 2	2010-11-26 12:42:21	Not Mature	F2
Achatinella	lila	2007	2007-02-12	2007-02-12	2007	2.07	Keiki		0	2.01	keiki 2	2011-02-11	Not Mature	F2
Achatinella	lila	2007	2007-02-14	2006-09-07	2006	5.72	Keiki	2.72	0.438356	3.75	keiki 4	2010-09-06	Not Mature	F2
Achatinella	lila	2007	2007-02-14	2007-01-12 15:31:45	2007	3.55	Keiki	0.55	0.0886382	2.7	keiki 4	2011-01-11 15:31:45	Not Mature	F2
Achatinella	lila	2007	2007-02-14	2007-01-23 19:45:52	2007	3.36	Keiki	0.36	0.0580177	2.55	keiki 4	2011-01-22 19:45:52	Not Mature	F2
Achatinella	lila	2007	2007-02-14	2007-01-23 19:45:52	2007	3.36	Keiki	0.36	0.0580177	2.6	keiki 4	2011-01-22 19:45:52	Not Mature	F2
Achatinella	lila	2007	2007-02-14	2007-02-05 04:14:07	2007	3.15	Keiki	0.15	0.0241741	2.6	keiki 4	2011-02-04 04:14:07	Not Mature	F2
Achatinella	lila	2007	2007-02-14	2007-02-08 02:49:24	2007	3.1	Keiki	0.1	0.016116	2.65	keiki 4	2011-02-07 02:49:24	Not Mature	F2
Achatinella	lila	2007	2007-02-14	2007-02-14	2007	2.96	Keiki		0	2.25	keiki 4	2011-02-13	Not Mature	F2
Achatinella	lila	2007	2007-02-15	2007-01-25 09:52:56	2007	3.35	Keiki	0.35	0.0564061	3.3	keiki 4	2011-01-24 09:52:56	Not Mature	F2
Achatinella	lila	2007	2007-02-23	2003-07-15 13:55:12	2003	14.44	NonKeiki	4.94	3.61211	9.25	keiki 2	2007-07-14 13:55:12	Not Mature	F2
Achatinella	lila	2007	2007-02-23	2003-10-06 13:40:48	2003	14.01	NonKeiki	4.51	3.38474	10.67	keiki 2	2007-10-05 13:40:48	Not Mature	F2
Achatinella	lila	2007	2007-02-23	2006-11-23 19:45:52	2006	4.55	Keiki	1.55	0.249799	3.49	Adults	2010-11-22 19:45:52	Not Mature	F2
Achatinella	lila	2007	2007-02-23	2007-01-10 11:17:38	2007	3.74	Keiki	0.74	0.119259	3.32	Adults	2011-01-09 11:17:38	Not Mature	F2
Achatinella	lila	2007	2007-02-23	2007-02-23	2007	2.67	Keiki		0	2.45	keiki 5	2011-02-22	Not Mature	F2
Achatinella	lila	2007	2007-02-26	2004-11-06 06:57:36	2004	11.97	NonKeiki	2.47	2.30605	7.85	keiki 3	2008-11-05 06:57:36	Not Mature	F2
Achatinella	lila	2007	2007-02-26	2005-03-29 02:38:24	2005	11.23	NonKeiki	1.73	1.91477	7.91	keiki 3	2009-03-28 02:38:24	Not Mature	F2
Achatinella	lila	2007	2007-02-26	2005-04-01 23:16:48	2005	11.21	NonKeiki	1.71	1.90419	8.41	keiki 3	2009-03-31 23:16:48	Not Mature	F2
Achatinella	lila	2007	2007-02-26	2005-05-10 13:40:48	2005	11.01	NonKeiki	1.51	1.79844	7.16	keiki 3	2009-05-09 13:40:48	Not Mature	F2
Achatinella	lila	2007	2007-02-26	2005-09-03 08:52:48	2005	10.41	NonKeiki	0.91	1.48118	7.24	keiki 3	2009-09-02 08:52:48	Not Mature	F2
Achatinella	lila	2007	2007-02-26	2006-03-13 14:07:03	2006	8.94	Keiki	5.94	0.957293	6.84	keiki 3	2010-03-12 14:07:03	Not Mature	F2
Achatinella	lila	2007	2007-02-26	2006-03-21 05:38:49	2006	8.81	Keiki	5.81	0.936342	5	keiki 3	2010-03-20 05:38:49	Not Mature	F2
Achatinella	lila	2007	2007-02-26	2006-05-03 04:14:07	2006	8.08	Keiki	5.08	0.818695	6.75	keiki 3	2010-05-02 04:14:07	Not Mature	F2
Achatinella	lila	2007	2007-02-26	2006-09-28 09:52:56	2006	5.56	Keiki	2.56	0.412571	4.9	keiki 3	2010-09-27 09:52:56	Not Mature	F2
Achatinella	lila	2007	2007-03-01	2007-03-01	2007	2.8	Keiki		0	2.64	keiki 4	2011-02-28	Not Mature	F2
Achatinella	lila	2007	2007-03-05	2006-10-08 22:35:17	2006	5.5	Keiki	2.5	0.402901	5.05	keiki 3	2010-10-07 22:35:17	Not Mature	F2
Achatinella	lila	2007	2007-03-05	2007-03-05	2007	2.9	Keiki		0	3.2	keiki 3	2011-03-04	Not Mature	F2
Achatinella	lila	2007	2007-03-07	2007-01-17 18:21:10	2007	3.82	Keiki	0.82	0.132151	2.71	keiki 3	2011-01-16 18:21:10	Not Mature	F2
Achatinella	lila	2007	2007-03-07	2007-01-30 16:56:28	2007	3.6	Keiki	0.6	0.0966962	3.22	keiki 3	2011-01-29 16:56:28	Not Mature	F2
Achatinella	lila	2007	2007-03-07	2007-03-07	2007	2.84	Keiki		0	2.2	keiki	2011-03-06	Not Mature	F2
Achatinella	lila	2007	2007-03-08	2007-02-08 08:28:14	2007	3.47	Keiki	0.47	0.0757454	3.11	keiki 5	2011-02-07 08:28:14	Not Mature	F2
Achatinella	lila	2007	2007-03-12	2006-06-11 11:17:38	2006	7.65	Keiki	4.65	0.749396	5.77	keiki 2	2010-06-10 11:17:38	Not Mature	F2
Achatinella	lila	2007	2007-03-12	2006-06-17 22:35:17	2006	7.54	Keiki	4.54	0.731668	5.59	keiki 5	2010-06-16 22:35:17	Not Mature	F2
Achatinella	lila	2007	2007-03-12	2006-11-03 18:21:10	2006	5.18	Keiki	2.18	0.35133	4.44	keiki 5	2010-11-02 18:21:10	Not Mature	F2
Achatinella	lila	2007	2007-03-12	2006-11-26 02:49:24	2006	4.8	Keiki	1.8	0.290089	3.99	keiki 5	2010-11-25 02:49:24	Not Mature	F2
Achatinella	lila	2007	2007-03-12	2006-12-02 14:07:03	2006	4.69	Keiki	1.69	0.272361	4.5	keiki 5	2010-12-01 14:07:03	Not Mature	F2
Achatinella	lila	2007	2007-03-12	2006-12-10 05:38:49	2006	4.56	Keiki	1.56	0.25141	3.76	keiki 5	2010-12-09 05:38:49	Not Mature	F2
Achatinella	lila	2007	2007-03-12	2007-01-12 18:21:10	2007	3.99	Keiki	0.99	0.159549	3.38	keiki 5	2011-01-11 18:21:10	Not Mature	F2
Achatinella	lila	2007	2007-03-12	2007-01-26 07:03:31	2007	3.76	Keiki	0.76	0.122482	3.5	keiki 5	2011-01-25 07:03:31	Not Mature	F2
Achatinella	lila	2007	2007-03-12	2007-02-22 08:28:14	2007	3.3	Keiki	0.3	0.0483481	3.5	keiki 5	2011-02-21 08:28:14	Not Mature	F2
Achatinella	lila	2007	2007-03-12	2007-02-28 05:38:49	2007	3.2	Keiki	0.2	0.0322321	3.34	keiki 5	2011-02-27 05:38:49	Not Mature	F2
Achatinella	lila	2007	2007-03-15	2007-03-15	2007	2.6	Keiki		0	2.65	keiki 4	2011-03-14	Not Mature	F2
Achatinella	lila	2007	2007-03-21	2006-12-04 12:42:21	2006	4.81	Keiki	1.81	0.2917	3.64	keiki	2010-12-03 12:42:21	Not Mature	F2
Achatinella	lila	2007	2007-03-21	2007-02-01 08:28:14	2007	3.81	Keiki	0.81	0.13054	3.62	keiki 3	2011-01-31 08:28:14	Not Mature	F2
Achatinella	lila	2007	2007-03-21	2007-02-17 19:45:52	2007	3.53	Keiki	0.53	0.085415	3.5	keiki 3	2011-02-16 19:45:52	Not Mature	F2
Achatinella	lila	2007	2007-03-23	2004-09-09 07:12:00	2004	12.4	NonKeiki	2.9	2.53342	9.55	Adults	2008-09-08 07:12:00	Not Mature	F2
Achatinella	lila	2007	2007-03-27	2005-08-13 04:33:36	2005	10.67	NonKeiki	1.17	1.61866	8.41	keiki 2	2009-08-12 04:33:36	Not Mature	F2
Achatinella	lila	2007	2007-03-27	2005-09-05 08:24:00	2005	10.55	NonKeiki	1.05	1.55521	8.9	keiki 2	2009-09-04 08:24:00	Not Mature	F2
Achatinella	lila	2007	2007-03-28	2007-02-02 11:17:38	2007	3.91	Keiki	0.91	0.146656	3.49	keiki 5	2011-02-01 11:17:38	Not Mature	F2
Achatinella	lila	2007	2007-03-28	2007-03-19 18:21:10	2007	3.14	Keiki	0.14	0.0225624	2.84	keiki 5	2011-03-18 18:21:10	Not Mature	F2
Achatinella	lila	2007	2007-04-05	2007-03-24 05:38:49	2007	3.2	Keiki	0.2	0.0322321	3.4	keiki 5	2011-03-23 05:38:49	Not Mature	F2
Achatinella	lila	2007	2007-04-05	2007-04-05	2007	2.6	Keiki		0	2.57	keiki	2011-04-04	Not Mature	F2
Achatinella	lila	2007	2007-04-09	2005-01-10 10:48:00	2005	11.85	NonKeiki	2.35	2.2426	8.09	keiki 2	2009-01-09 10:48:00	Not Mature	F2
Achatinella	lila	2007	2007-04-12	2007-02-12 18:21:10	2007	3.99	Keiki	0.99	0.159549	3.65	keiki 4	2011-02-11 18:21:10	Not Mature	F2
Achatinella	lila	2007	2007-04-12	2007-03-01 19:45:52	2007	3.7	Keiki	0.7	0.112812	3.42	keiki 4	2011-02-28 19:45:52	Not Mature	F2
Achatinella	lila	2007	2007-04-12	2007-04-03 04:14:07	2007	3.15	Keiki	0.15	0.0241741	3.08	keiki 4	2011-04-02 04:14:07	Not Mature	F2
Achatinella	lila	2007	2007-05-02	2006-12-11 19:45:52	2006	5.4	Keiki	2.4	0.386785	4.26	keiki 5	2010-12-10 19:45:52	Not Mature	F2
Achatinella	lila	2007	2007-05-04	2005-07-16 13:40:48	2005	11.01	NonKeiki	1.51	1.79844	9.61	Adults	2009-07-15 13:40:48	Not Mature	F2
Achatinella	lila	2007	2007-05-04	2007-04-28 02:49:24	2007	3.1	Keiki	0.1	0.016116	2.6	Adults	2011-04-27 02:49:24	Not Mature	F2
Achatinella	lila	2007	2007-05-07	2007-01-26 09:52:56	2007	4.71	Keiki	1.71	0.275584	3.76	keiki 5	2011-01-25 09:52:56	Not Mature	F2
Achatinella	lila	2007	2007-05-10	2007-04-20	2007	3.34	Keiki	0.34	0.0547945	2.78	keiki 4	2011-04-19	Not Mature	F2
Achatinella	lila	2007	2007-05-11	2007-05-11	2007	2.77	Keiki		0	2.16	keiki 4	2011-05-10	Not Mature	F2
Achatinella	lila	2007	2007-05-14	2007-05-08 02:49:24	2007	3.1	Keiki	0.1	0.016116	3.1	keiki 3	2011-05-07 02:49:24	Not Mature	F2
Achatinella	lila	2007	2007-05-14	2007-05-14	2007	2.75	Keiki		0	2.55	keiki 3	2011-05-13	Not Mature	F2
Achatinella	lila	2007	2007-05-17	2007-05-17	2007	2.95	Keiki		0	2.6	keiki 5	2011-05-16	Not Mature	F2
Achatinella	lila	2007	2007-05-17	2007-05-17	2007	2.65	Keiki		0	2.87	keiki 5	2011-05-16	Not Mature	F2
Achatinella	lila	2007	2007-05-24	2007-05-14	2007	3.17	Keiki	0.17	0.0273973	2.48	keiki 4	2011-05-13	Not Mature	F2
Achatinella	lila	2007	2007-05-24	2007-05-14	2007	3.17	Keiki	0.17	0.0273973	2.48	keiki 4	2011-05-13	Not Mature	F2
Achatinella	lila	2007	2007-05-24	2007-05-24	2007	2.76	Keiki		0	2.16	keiki 4	2011-05-23	Not Mature	F2
Achatinella	lila	2007	2007-05-30	2007-05-06 11:17:38	2007	3.4	Keiki	0.4	0.0644641	2.41	keiki	2011-05-05 11:17:38	Not Mature	F2
Achatinella	lila	2007	2007-05-31	2007-05-16 07:03:31	2007	3.25	Keiki	0.25	0.0402901	3.4	keiki 5	2011-05-15 07:03:31	Not Mature	F2
Achatinella	lila	2007	2007-05-31	2007-05-16 07:03:31	2007	3.25	Keiki	0.25	0.0402901	3.55	keiki 5	2011-05-15 07:03:31	Not Mature	F2
Achatinella	lila	2007	2007-05-31	2007-05-31	2007	1.7	Keiki		0	1.95	keiki 5	2011-05-30	Not Mature	F2
Achatinella	lila	2007	2007-06-04	2004-02-23 04:04:48	2004	13.81	NonKeiki	4.31	3.27899	9.61	keiki 2	2008-02-22 04:04:48	Not Mature	F2
Achatinella	lila	2007	2007-06-05	2007-06-05	2007	2.2	Keiki		0	2.2	keiki 4	2011-06-04	Not Mature	F2
Achatinella	lila	2007	2007-06-24	2007-06-24	2007	2.41	Keiki		0	2	keiki 4	2011-06-23	Not Mature	F2
Achatinella	lila	2007	2007-07-06	2007-05-19 08:28:14	2007	3.81	Keiki	0.81	0.13054	3.1	keiki 4	2011-05-18 08:28:14	Not Mature	F2
Achatinella	lila	2007	2007-07-06	2007-06-08 22:35:17	2007	3.46	Keiki	0.46	0.0741338	2.71	keiki 4	2011-06-07 22:35:17	Not Mature	F2
Achatinella	lila	2007	2007-07-12	2007-07-12	2007	2.26	Keiki		0	1.68	keiki 5	2011-07-11	Not Mature	F2
Achatinella	lila	2007	2007-07-19	2004-01-04 14:24:00	2004	14.3	NonKeiki	4.8	3.53808	10.65	keiki 4	2008-01-03 14:24:00	Not Mature	F2
Achatinella	lila	2007	2007-08-08	2007-07-26 15:31:45	2007	3.21	Keiki	0.21	0.0338437	2.67	keiki 5	2011-07-25 15:31:45	Not Mature	F2
Achatinella	lila	2007	2007-08-31	2007-08-17 11:17:38	2007	3.23	Keiki	0.23	0.0370669	2.62	keiki 4	2011-08-16 11:17:38	Not Mature	F2
Achatinella	lila	2007	2007-09-06	2007-07-16 19:45:52	2007	3.87	Keiki	0.87	0.14021	2.94	keiki 3	2011-07-15 19:45:52	Not Mature	F2
Achatinella	lila	2007	2007-09-08	2007-09-02 16:56:28	2007	3.09	Keiki	0.09	0.0145044	2.62	keiki 5	2011-09-01 16:56:28	Not Mature	F2
Achatinella	lila	2007	2007-09-13	2004-05-07 03:36:00	2004	13.95	NonKeiki	4.45	3.35301	10.95	keiki	2008-05-06 03:36:00	Not Mature	F2
Achatinella	lila	2007	2007-09-13	2007-09-13	2007	2.97	Keiki		0	2.42	keiki 4	2011-09-12	Not Mature	F2
Achatinella	lila	2007	2007-09-14	2007-08-22 01:24:42	2007	3.39	Keiki	0.39	0.0628525	2.79	keiki 4	2011-08-21 01:24:42	Not Mature	F2
Achatinella	lila	2007	2007-09-14	2007-09-14	2007	2.65	Keiki		0	2.25	keiki 4	2011-09-13	Not Mature	F2
Achatinella	lila	2007	2007-10-04	2007-10-04	2007	2.78	Keiki		0	2.25	keiki 5	2011-10-03	Not Mature	F2
Achatinella	lila	2007	2007-10-12	2007-10-12	2007	2.48	Keiki		0	2.19	keiki 4	2011-10-11	Not Mature	F2
Achatinella	lila	2007	2007-10-12	2007-10-12	2007	1.96	Keiki		0	1.54	keiki 4	2011-10-11	Not Mature	F2
Achatinella	lila	2007	2007-10-18	2004-08-31 05:02:24	2004	13.53	NonKeiki	4.03	3.13093	10.13	Adults	2008-08-30 05:02:24	Not Mature	F2
Achatinella	lila	2007	2007-10-18	2007-10-18	2007	2.3	Keiki		0	1.82	Adults	2011-10-17	Not Mature	F2
Achatinella	lila	2007	2007-10-26	2007-08-29 22:35:17	2007	3.97	Keiki	0.97	0.156326	2.94	keiki 4	2011-08-28 22:35:17	Not Mature	F2
Achatinella	lila	2007	2007-10-26	2007-09-30 02:49:24	2007	3.44	Keiki	0.44	0.0709106	2.95	keiki 4	2011-09-29 02:49:24	Not Mature	F2
Achatinella	lila	2007	2007-10-26	2007-09-30 02:49:24	2007	3.44	Keiki	0.44	0.0709106	2.95	keiki 4	2011-09-29 02:49:24	Not Mature	F2
Achatinella	lila	2007	2007-11-12	2007-07-26 04:14:07	2007	4.85	Keiki	1.85	0.298147	3.62	keiki 4	2011-07-25 04:14:07	Not Mature	F2
Achatinella	lila	2007	2007-11-12	2007-11-04 08:28:14	2007	3.13	Keiki	0.13	0.0209508	2.55	keiki 4	2011-11-03 08:28:14	Not Mature	F2
Achatinella	lila	2007	2007-11-12	2007-11-06 16:56:28	2007	3.09	Keiki	0.09	0.0145044	2.5	keiki 4	2011-11-05 16:56:28	Not Mature	F2
Achatinella	lila	2007	2007-11-15	2007-10-31 07:03:31	2007	3.25	Keiki	0.25	0.0402901	2.65	Adults	2011-10-30 07:03:31	Not Mature	F2
Achatinella	lila	2007	2007-11-16	2007-09-02 07:03:31	2007	4.27	Keiki	1.27	0.204674	3.5	keiki 5	2011-09-01 07:03:31	Not Mature	F2
Achatinella	lila	2007	2007-12-16	2007-11-24 19:45:52	2007	3.36	Keiki	0.36	0.0580177	2.59	keiki 5	2011-11-23 19:45:52	Not Mature	F2
Achatinella	lila	2007	2007-12-16	2007-12-11 21:10:35	2007	3.07	Keiki	0.07	0.0112812	2.46	keiki 5	2011-12-10 21:10:35	Not Mature	F2
Achatinella	lila	2008	2008-01-02	2007-11-18 21:10:35	2007	3.75	Keiki	0.75	0.12087	3.37	keiki 5	2011-11-17 21:10:35	Not Mature	F2
Achatinella	lila	2008	2008-01-02	2007-11-24 18:21:10	2007	3.65	Keiki	0.65	0.104754	3.15	keiki 5	2011-11-23 18:21:10	Not Mature	F2
Achatinella	lila	2008	2008-01-02	2007-12-08 21:10:35	2007	3.41	Keiki	0.41	0.0660757	2.9	keiki 5	2011-12-07 21:10:35	Not Mature	F2
Achatinella	lila	2008	2008-01-02	2007-12-12 09:52:56	2007	3.35	Keiki	0.35	0.0564061	3.17	keiki 5	2011-12-11 09:52:56	Not Mature	F2
Achatinella	lila	2008	2008-01-02	2007-12-26 12:42:21	2007	3.11	Keiki	0.11	0.0177276	2.56	keiki 5	2011-12-25 12:42:21	Not Mature	F2
Achatinella	lila	2008	2008-01-02	2008-01-02	2008	2	Keiki		0	1.87	keiki 5	2012-01-01	Not Mature	F2
Achatinella	lila	2008	2008-01-09	2008-01-09	2008	2.51	Keiki		0	2.5	keiki 5	2012-01-08	Not Mature	F2
Achatinella	lila	2008	2008-01-18	2008-01-18	2008	2.78	Keiki		0	2.03	keiki 4	2012-01-17	Not Mature	F2
Achatinella	lila	2008	2008-01-28	2007-01-17 02:49:24	2007	9.39	Keiki	6.39	1.02981	7.7	keiki	2011-01-16 02:49:24	Not Mature	F2
Achatinella	lila	2008	2008-02-08	2008-01-26 01:24:42	2008	3.22	Keiki	0.22	0.0354553	2.48	keiki	2012-01-25 01:24:42	Not Mature	F2
Achatinella	lila	2008	2008-02-11	2005-10-12 15:21:36	2005	12.02	NonKeiki	2.52	2.33249	9	keiki 2	2009-10-11 15:21:36	Not Mature	F2
Achatinella	lila	2008	2008-03-07	2008-01-05 05:38:49	2008	4.05	Keiki	1.05	0.169218	3.15	keiki	2012-01-04 05:38:49	Not Mature	F2
Achatinella	lila	2008	2008-03-24	2008-02-09 11:17:38	2008	3.74	Keiki	0.74	0.119259	2.8	keiki 5	2012-02-08 11:17:38	Not Mature	F2
Achatinella	lila	2008	2008-03-24	2008-02-21 05:38:49	2008	3.54	Keiki	0.54	0.0870266	2.58	keiki 5	2012-02-20 05:38:49	Not Mature	F2
Achatinella	lila	2008	2008-03-24	2008-03-24	2008	2.9	Keiki		0	2.8	keiki 5	2012-03-23	Not Mature	F2
Achatinella	lila	2008	2008-04-16	2008-03-12 21:10:35	2008	3.58	Keiki	0.58	0.093473	2.99	keiki 5	2012-03-11 21:10:35	Not Mature	F2
Achatinella	lila	2008	2008-04-23	2008-04-23	2008	2.68	Keiki		0	2.17	keiki	2012-04-22	Not Mature	F2
Achatinella	lila	2008	2008-05-08	2008-04-11 12:42:21	2008	3.45	Keiki	0.45	0.0725222	3.02	keiki 4	2012-04-10 12:42:21	Not Mature	F2
Achatinella	lila	2008	2008-05-08	2008-05-08	2008	2.94	Keiki		0	2.66	keiki 4	2012-05-07	Not Mature	F2
Achatinella	lila	2008	2008-05-13	2004-08-09 12:57:36	2004	14.72	NonKeiki	5.22	3.76016	9.15	keiki	2008-08-08 12:57:36	Not Mature	F2
Achatinella	lila	2008	2008-05-13	2006-09-03 04:04:48	2006	10.81	NonKeiki	1.31	1.69268	7.98	Adults	2010-09-02 04:04:48	Not Mature	F2
Achatinella	lila	2008	2008-05-22	2008-05-22	2008	2.96	Keiki		0	2.6	keiki 4	2012-05-21	Not Mature	F2
Achatinella	lila	2008	2008-06-02	2008-04-18 21:10:35	2008	3.75	Keiki	0.75	0.12087	2.91	keiki 5	2012-04-17 21:10:35	Not Mature	F2
Achatinella	lila	2008	2008-06-02	2008-05-03 14:07:03	2008	3.5	Keiki	0.5	0.0805802	2.69	Adults	2012-05-02 14:07:03	Not Mature	F2
Achatinella	lila	2008	2008-06-02	2008-05-30 15:31:45	2008	3.04	Keiki	0.04	0.00644641	2.5	keiki 5	2012-05-29 15:31:45	Not Mature	F2
Achatinella	lila	2008	2008-06-19	2008-06-19	2008	2.66	Keiki		0	2.71	keiki 4	2012-06-18	Not Mature	F2
Achatinella	lila	2008	2008-06-25	2006-07-13 14:24:00	2006	11.3	NonKeiki	1.8	1.95178	7.81	keiki 3	2010-07-12 14:24:00	Not Mature	F2
Achatinella	lila	2008	2008-06-26	2008-04-14 15:31:45	2008	4.23	Keiki	1.23	0.198227	3.35	Adults	2012-04-13 15:31:45	Not Mature	F2
Achatinella	lila	2008	2008-06-26	2008-04-29 22:35:17	2008	3.97	Keiki	0.97	0.156326	2.86	keiki 5	2012-04-28 22:35:17	Not Mature	F2
Achatinella	lila	2008	2008-06-26	2008-06-24 19:45:52	2008	3.02	Keiki	0.02	0.00322321	2.36	Adults	2012-06-23 19:45:52	Not Mature	F2
Achatinella	lila	2008	2008-06-26	2008-06-26	2008	2.2	Keiki		0	1.85	Adults	2012-06-25	Not Mature	F2
Achatinella	lila	2008	2008-06-30	2008-05-05 02:49:24	2008	3.95	Keiki	0.95	0.153102	3.09	keiki 2	2012-05-04 02:49:24	Not Mature	F2
Achatinella	lila	2008	2008-06-30	2008-05-09 05:38:49	2008	3.88	Keiki	0.88	0.141821	2.76	keiki	2012-05-08 05:38:49	Not Mature	F2
Achatinella	lila	2008	2008-07-03	2008-06-02 09:52:56	2008	3.52	Keiki	0.52	0.0838034	3.28	keiki 4	2012-06-01 09:52:56	Not Mature	F2
Achatinella	lila	2008	2008-07-08	2008-05-10 04:14:07	2008	4	Keiki	1	0.16116	2.94	keiki 3	2012-05-09 04:14:07	Not Mature	F2
Achatinella	lila	2008	2008-07-09	2008-06-06 01:24:42	2008	3.56	Keiki	0.56	0.0902498	2.73	Adults	2012-06-05 01:24:42	Not Mature	F2
Achatinella	lila	2008	2008-07-09	2008-07-07 19:45:52	2008	3.02	Keiki	0.02	0.00322321	2.32	Adults	2012-07-06 19:45:52	Not Mature	F2
Achatinella	lila	2008	2008-07-09	2008-07-09	2008	2.87	Keiki		0	1.79	Adults	2012-07-08	Not Mature	F2
Achatinella	lila	2008	2008-07-16	2008-05-25 19:45:52	2008	3.87	Keiki	0.87	0.14021	3.05	Adults	2012-05-24 19:45:52	Not Mature	F2
Achatinella	lila	2008	2008-07-16	2008-06-26	2008	3.34	Keiki	0.34	0.0547945	2.65	Adults	2012-06-25	Not Mature	F2
Achatinella	lila	2008	2008-07-16	2008-07-16	2008	2.05	Keiki		0	1.5	Adults	2012-07-15	Not Mature	F2
Achatinella	lila	2008	2008-07-31	2008-07-31	2008	1.82	Keiki		0	1.56	keiki 4	2012-07-30	Not Mature	F2
Achatinella	lila	2008	2008-08-08	2008-06-10 04:14:07	2008	4	Keiki	1	0.16116	3.05	keiki	2012-06-09 04:14:07	Not Mature	F2
Achatinella	lila	2008	2008-08-08	2008-07-20 04:14:07	2008	3.32	Keiki	0.32	0.0515713	2.84	keiki 5	2012-07-19 04:14:07	Not Mature	F2
Achatinella	lila	2008	2008-08-12	2005-04-21 14:09:36	2005	13.87	NonKeiki	4.37	3.31071	11.01	keiki 2	2009-04-20 14:09:36	Not Mature	F2
Achatinella	lila	2008	2008-08-12	2008-08-12	2008	2.48	Keiki		0	1.74	keiki 2	2012-08-11	Not Mature	F3
Achatinella	lila	2008	2008-08-14	2008-07-02 15:31:45	2008	3.72	Keiki	0.72	0.116035	3.26	keiki 4	2012-07-01 15:31:45	Not Mature	F2
Achatinella	lila	2008	2008-08-14	2008-08-14	2008	2.96	Keiki		0	2.19	keiki 4	2012-08-13	Not Mature	F3
Achatinella	lila	2008	2008-08-21	2008-06-22 14:07:03	2008	4.01	Keiki	1.01	0.162772	3.35	keiki	2012-06-21 14:07:03	Not Mature	F2
Achatinella	lila	2008	2008-08-21	2008-08-21	2008	2.81	Keiki		0	2.2	keiki 5	2012-08-20	Not Mature	F3
Achatinella	lila	2008	2008-08-28	2008-08-01 12:42:21	2008	3.45	Keiki	0.45	0.0725222	3.03	keiki 4	2012-07-31 12:42:21	Not Mature	F3
Achatinella	lila	2008	2008-09-04	2005-03-15 18:14:24	2005	14.18	NonKeiki	4.68	3.47463	11.29	Adults	2009-03-14 18:14:24	Not Mature	F2
Achatinella	lila	2008	2008-09-07	2005-02-12 00:28:48	2005	14.36	NonKeiki	4.86	3.56981	9.96	keiki 2	2009-02-11 00:28:48	Not Mature	F2
Achatinella	lila	2008	2008-09-08	2008-08-01 22:35:17	2008	3.63	Keiki	0.63	0.101531	2.83	keiki 4	2012-07-31 22:35:17	Not Mature	F3
Achatinella	lila	2008	2008-09-16	2008-08-12 21:10:35	2008	3.58	Keiki	0.58	0.093473	2.76	keiki 3	2012-08-11 21:10:35	Not Mature	F3
Achatinella	lila	2008	2008-09-18	2004-11-18 12:28:48	2004	14.86	NonKeiki	5.36	3.83419	10.02	Adults	2008-11-17 12:28:48	Not Mature	F2
Achatinella	lila	2008	2008-09-18	2005-03-14 07:40:48	2005	14.26	NonKeiki	4.76	3.51693	10.18	Adults	2009-03-13 07:40:48	Not Mature	F2
Achatinella	lila	2008	2008-09-18	2008-09-18	2008	3	Keiki	0	0	2.48	Adults	2012-09-17	Not Mature	F3
Achatinella	lila	2008	2008-09-18	2008-09-18	2008	2.28	Keiki		0	2.34	Adults	2012-09-17	Not Mature	F3
Achatinella	lila	2008	2008-09-19	2008-09-19	2008	2.86	Keiki		0	2.38	keiki 4	2012-09-18	Not Mature	F3
Achatinella	lila	2008	2008-10-03	2008-10-03	2008	2.35	Keiki		0	2.04	keiki 5	2012-10-02	Not Mature	F3
Achatinella	lila	2008	2008-10-09	2008-08-24 02:49:24	2008	3.78	Keiki	0.78	0.125705	3.11	keiki 4	2012-08-23 02:49:24	Not Mature	F3
Achatinella	lila	2008	2008-10-09	2008-09-29	2008	3.17	Keiki	0.17	0.0273973	2.47	keiki 2	2012-09-28	Not Mature	F3
Achatinella	lila	2008	2008-10-09	2008-10-09	2008	2.77	Keiki		0	2.27	keiki 4	2012-10-08	Not Mature	F3
Achatinella	lila	2008	2008-10-14	2005-09-24 05:31:12	2005	13.39	NonKeiki	3.89	3.0569	9.4	keiki 3	2009-09-23 05:31:12	Not Mature	F2
Achatinella	lila	2008	2008-10-20	2008-01-22 19:45:52	2008	7.61	Keiki	4.61	0.742949	5.66	keiki 2	2012-01-21 19:45:52	Not Mature	F2
Achatinella	lila	2008	2008-10-30	2008-07-30 05:38:49	2008	4.56	Keiki	1.56	0.25141	2.66	keiki 5	2012-07-29 05:38:49	Not Mature	F2
Achatinella	lila	2008	2008-10-30	2008-09-16 11:17:38	2008	3.74	Keiki	0.74	0.119259	3.12	keiki 5	2012-09-15 11:17:38	Not Mature	F3
Achatinella	lila	2008	2008-11-06	2008-08-07 09:52:56	2008	4.54	Keiki	1.54	0.248187	4.28	keiki 4	2012-08-06 09:52:56	Not Mature	F3
Achatinella	lila	2008	2008-11-06	2008-09-10 12:42:21	2008	3.96	Keiki	0.96	0.154714	4.1	keiki 4	2012-09-09 12:42:21	Not Mature	F3
Achatinella	lila	2008	2008-11-06	2008-09-27	2008	3.68	Keiki	0.68	0.109589	3.42	keiki 4	2012-09-26	Not Mature	F3
Achatinella	lila	2008	2008-11-06	2008-11-06	2008	2.81	Keiki		0	3.6	keiki 4	2012-11-05	Not Mature	F3
Achatinella	lila	2008	2008-11-06	2008-11-06	2008	2.8	Keiki		0	2.6	keiki 4	2012-11-05	Not Mature	F3
Achatinella	lila	2008	2008-12-01	2008-09-14 08:28:14	2008	4.32	Keiki	1.32	0.212732	4.06	keiki 5	2012-09-13 08:28:14	Not Mature	F3
Achatinella	lila	2008	2008-12-01	2008-10-22	2008	3.68	Keiki	0.68	0.109589	3.1	keiki 5	2012-10-21	Not Mature	F3
Achatinella	lila	2008	2008-12-01	2008-10-31 09:52:56	2008	3.52	Keiki	0.52	0.0838034	3.16	keiki	2012-10-30 09:52:56	Not Mature	F3
Achatinella	lila	2008	2008-12-01	2008-11-09 19:45:52	2008	3.36	Keiki	0.36	0.0580177	2.77	keiki 5	2012-11-08 19:45:52	Not Mature	F3
Achatinella	lila	2008	2008-12-01	2008-11-11	2008	3.34	Keiki	0.34	0.0547945	2.78	keiki 5	2012-11-10	Not Mature	F3
Achatinella	lila	2008	2008-12-15	2007-07-08 19:26:24	2007	10.33	NonKeiki	0.83	1.43888	7.51	keiki 5	2011-07-07 19:26:24	Not Mature	F2
Achatinella	lila	2008	2008-12-15	2008-01-31 04:14:07	2008	8.42	Keiki	5.42	0.873489	5.84	keiki 5	2012-01-30 04:14:07	Not Mature	F2
Achatinella	lila	2008	2008-12-23	2008-12-10 01:24:42	2008	3.22	Keiki	0.22	0.0354553	2.76	keiki 4	2012-12-09 01:24:42	Not Mature	F3
Achatinella	lila	2009	2009-01-03	2008-12-18 16:56:28	2008	3.26	Keiki	0.26	0.0419017	2.84	keiki	2012-12-17 16:56:28	Not Mature	F3
Achatinella	lila	2009	2009-01-04	2008-10-20 16:56:28	2008	4.28	Keiki	1.28	0.206285	4.62	keiki 4	2012-10-19 16:56:28	Not Mature	F3
Achatinella	lila	2009	2009-01-04	2008-12-26 18:21:10	2008	3.14	Keiki	0.14	0.0225624	2.76	keiki 4	2012-12-25 18:21:10	Not Mature	F3
Achatinella	lila	2009	2009-01-08	2008-10-16 11:17:38	2008	4.42	Keiki	1.42	0.228848	4.12	keiki 3	2012-10-15 11:17:38	Not Mature	F3
Achatinella	lila	2009	2009-01-12	2008-11-03 14:07:03	2008	4.18	Keiki	1.18	0.190169	3.66	HD keiki 2	2012-11-02 14:07:03	Not Mature	F3
Achatinella	lila	2009	2009-01-16	2008-11-28 18:21:10	2008	3.82	Keiki	0.82	0.132151	2.84	keiki 4	2012-11-27 18:21:10	Not Mature	F3
Achatinella	lila	2009	2009-01-16	2009-01-16	2009	2.64	Keiki		0	1.98	keiki 4	2013-01-15	Not Mature	F3
Achatinella	lila	2009	2009-01-16	2009-01-16	2009	2.48	Keiki		0	2.16	keiki 4	2013-01-15	Not Mature	F3
Achatinella	lila	2009	2009-01-19	2008-04-05 18:21:10	2008	7.9	Keiki	4.9	0.789686	5.84	keiki 5	2012-04-04 18:21:10	Not Mature	F2
Achatinella	lila	2009	2009-01-23	2008-07-29 08:28:14	2008	6.02	Keiki	3.02	0.486704	4.54	keiki	2012-07-28 08:28:14	Not Mature	F2
Achatinella	lila	2009	2009-01-23	2008-11-24 14:07:03	2008	4.01	Keiki	1.01	0.162772	4.02	keiki	2012-11-23 14:07:03	Not Mature	F3
Achatinella	lila	2009	2009-01-26	2009-01-26	2009	2.72	Keiki		0	2.28	keiki 2	2013-01-25	Not Mature	F3
Achatinella	lila	2009	2009-02-06	2008-11-09 18:21:10	2008	4.5	Keiki	1.5	0.241741	3.62	keiki	2012-11-08 18:21:10	Not Mature	F3
Achatinella	lila	2009	2009-02-16	2009-02-16	2009	2.66	Keiki		0	2.38		2013-02-15	Not Mature	F3
Achatinella	lila	2009	2009-02-18	2009-02-18	2009	2.92	Keiki		0	2.16	keiki 4	2013-02-17	Not Mature	F3
Achatinella	lila	2009	2009-02-25	2009-01-08 08:28:14	2009	3.81	Keiki	0.81	0.13054	2.79	keiki	2013-01-07 08:28:14	Not Mature	F3
Achatinella	lila	2009	2009-03-03	2007-01-03 09:36:00	2007	11.7	NonKeiki	2.2	2.16329	9.42	keiki 4	2011-01-02 09:36:00	Not Mature	F2
Achatinella	lila	2009	2009-03-03	2008-12-02 09:52:56	2008	4.54	Keiki	1.54	0.248187	4.48	keiki 4	2012-12-01 09:52:56	Not Mature	F3
Achatinella	lila	2009	2009-03-04	2009-02-12	2009	3.34	Keiki	0.34	0.0547945	2.38	keiki	2013-02-11	Not Mature	F3
Achatinella	lila	2009	2009-03-13	2009-01-28 11:17:38	2009	3.74	Keiki	0.74	0.119259	3.24	keiki	2013-01-27 11:17:38	Not Mature	F3
Achatinella	lila	2009	2009-03-20	2009-02-13 21:10:35	2009	3.58	Keiki	0.58	0.093473	3.14	keiki 5	2013-02-12 21:10:35	Not Mature	F3
Achatinella	lila	2009	2009-03-23	2009-03-23	2009	2.8	Keiki		0	2.2	keiki 4	2013-03-22	Not Mature	F3
Achatinella	lila	2009	2009-03-24	2005-08-13 13:55:12	2005	14.44	NonKeiki	4.94	3.61211	10.28	Adults	2009-08-12 13:55:12	Not Mature	F2
Achatinella	lila	2009	2009-04-09	2009-04-09	2009	2.5	Keiki		0	2.12	Adults 4	2013-04-08	Not Mature	F3
Achatinella	lila	2009	2009-04-09	2009-04-09	2009	2.48	Keiki		0	1.92	Adults 4	2013-04-08	Not Mature	F3
Achatinella	lila	2009	2009-04-12	2006-04-01 21:07:12	2006	13.34	NonKeiki	3.84	3.03047	9.46	LD keiki 2	2010-03-31 21:07:12	Not Mature	F2
Achatinella	lila	2009	2009-04-24	2009-02-20 15:31:45	2009	4.06	Keiki	1.06	0.17083	3.73	keiki 3	2013-02-19 15:31:45	Not Mature	F3
Achatinella	lila	2009	2009-04-24	2009-04-09 07:03:31	2009	3.25	Keiki	0.25	0.0402901	2.85	Adults 2	2013-04-08 07:03:31	Not Mature	F3
Achatinella	lila	2009	2009-04-25	2006-01-25 18:00:00	2006	13.75	NonKeiki	4.25	3.24726	8.73	HD keiki 2	2010-01-24 18:00:00	Not Mature	F2
Achatinella	lila	2009	2009-05-06	2008-04-27 11:17:38	2008	9.35	Keiki	6.35	1.02337	5.9	Adults 1	2012-04-26 11:17:38	Not Mature	F2
Achatinella	lila	2009	2009-05-06	2009-04-23 15:31:45	2009	3.21	Keiki	0.21	0.0338437	2.85	Adults 1	2013-04-22 15:31:45	Not Mature	F3
Achatinella	lila	2009	2009-05-21	2006-06-20 09:50:24	2006	13.13	NonKeiki	3.63	2.91942	9.9	Adults 4	2010-06-19 09:50:24	Not Mature	F2
Achatinella	lila	2009	2009-05-21	2009-05-07 11:17:38	2009	3.23	Keiki	0.23	0.0370669	2.61	Adults 4	2013-05-06 11:17:38	Not Mature	F3
Achatinella	lila	2009	2009-05-21	2009-05-21	2009	2.95	Keiki		0	2.45	Adults 4	2013-05-20	Not Mature	F3
Achatinella	lila	2009	2009-05-22	2009-04-30 19:45:52	2009	3.36	Keiki	0.36	0.0580177	2.6	keiki 5	2013-04-29 19:45:52	Not Mature	F3
Achatinella	lila	2009	2009-05-22	2009-05-22	2009	2.98	Keiki		0	2.22	keiki 4	2013-05-21	Not Mature	F3
Achatinella	lila	2009	2009-06-02	2009-05-22 09:52:56	2009	3.18	Keiki	0.18	0.0290089	2.43	Adults 5	2013-05-21 09:52:56	Not Mature	F3
Achatinella	lila	2009	2009-06-03	2009-06-03	2009	2.98	Keiki		0	3.06	Adults 6	2013-06-02	Not Mature	F3
Achatinella	lila	2009	2009-06-10	2009-04-20 09:52:56	2009	3.86	Keiki	0.86	0.138598	3.52	Adults 2	2013-04-19 09:52:56	Not Mature	F3
Achatinella	lila	2009	2009-06-10	2009-05-11 14:07:03	2009	3.5	Keiki	0.5	0.0805802	2.66	Adults 1	2013-05-10 14:07:03	Not Mature	F3
Achatinella	lila	2009	2009-06-16	2005-08-04 22:33:36	2005	14.92	NonKeiki	5.42	3.86592	9.94	Adults 4	2009-08-03 22:33:36	Not Mature	F2
Achatinella	lila	2009	2009-06-16	2008-12-16 19:45:52	2008	6.08	Keiki	3.08	0.496374	5.28	keiki 5	2012-12-15 19:45:52	Not Mature	F3
Achatinella	lila	2009	2009-06-23	2005-08-23 12:28:48	2005	14.86	NonKeiki	5.36	3.83419	8.51	Adults 5	2009-08-22 12:28:48	Not Mature	F2
Achatinella	lila	2009	2009-06-26	2009-04-08 04:14:07	2009	4.34	Keiki	1.34	0.215955	3.63	Extra Mixed	2013-04-07 04:14:07	Not Mature	F3
Achatinella	lila	2009	2009-06-26	2009-06-14 05:38:49	2009	3.2	Keiki	0.2	0.0322321	2.41	Extra Mixed	2013-06-13 05:38:49	Not Mature	F3
Achatinella	lila	2009	2009-06-26	2009-06-14 05:38:49	2009	3.2	Keiki	0.2	0.0322321	2.67	Extra snails 2	2013-06-13 05:38:49	Not Mature	F3
Achatinella	lila	2009	2009-06-30	2009-06-30	2009	2.92	Keiki		0	2.38	Extra snails 2	2013-06-29	Not Mature	F3
Achatinella	lila	2009	2009-07-09	2009-06-18 09:52:56	2009	3.35	Keiki	0.35	0.0564061	2.3	HD keiki 3	2013-06-17 09:52:56	Not Mature	F3
Achatinella	lila	2009	2009-07-14	2009-07-14	2009	2.52	Keiki		0	2.26	Extra snails 1	2013-07-13	Not Mature	F3
Achatinella	lila	2009	2009-07-24	2009-05-30 07:03:31	2009	3.93	Keiki	0.93	0.149879	3.21	HD keiki 3	2013-05-29 07:03:31	Not Mature	F3
Achatinella	lila	2009	2009-07-31	2009-07-23 22:35:17	2009	3.12	Keiki	0.12	0.0193392	2.48	Extra snails 2	2013-07-22 22:35:17	Not Mature	F3
Achatinella	lila	2009	2009-08-06	2009-06-24 01:24:42	2009	3.73	Keiki	0.73	0.117647	3.08	HD keiki 2	2013-06-23 01:24:42	Not Mature	F3
Achatinella	lila	2009	2009-08-07	2009-07-08 14:07:03	2009	3.5	Keiki	0.5	0.0805802	2.97	HD keiki 3	2013-07-07 14:07:03	Not Mature	F3
Achatinella	lila	2009	2009-08-07	2009-07-10 22:35:17	2009	3.46	Keiki	0.46	0.0741338	2.78	HD keiki 3	2013-07-09 22:35:17	Not Mature	F3
Achatinella	lila	2009	2009-08-12	2009-08-04 22:35:17	2009	3.12	Keiki	0.12	0.0193392	2.08	Extra snails 2	2013-08-03 22:35:17	Not Mature	F3
Achatinella	lila	2009	2009-08-20	2009-08-02 08:28:14	2009	3.3	Keiki	0.3	0.0483481	2.28	HD keiki 1	2013-08-01 08:28:14	Not Mature	F3
Achatinella	lila	2009	2009-08-28	2009-06-23 02:49:24	2009	4.12	Keiki	1.12	0.1805	2.94	Extra snails 2	2013-06-22 02:49:24	Not Mature	F3
Achatinella	lila	2009	2009-08-28	2009-07-10 18:21:10	2009	3.82	Keiki	0.82	0.132151	2.6	Extra snails 2	2013-07-09 18:21:10	Not Mature	F3
Achatinella	lila	2009	2009-08-31	2009-07-17 07:03:31	2009	3.76	Keiki	0.76	0.122482	2.72	HD keiki 3	2013-07-16 07:03:31	Not Mature	F3
Achatinella	lila	2009	2009-09-01	2009-03-13 05:38:49	2009	5.92	Keiki	2.92	0.470588	4.55	HD keiki 3	2013-03-12 05:38:49	Not Mature	F3
Achatinella	lila	2009	2009-09-01	2009-08-27 21:10:35	2009	3.07	Keiki	0.07	0.0112812	2.46	HD keiki 2	2013-08-26 21:10:35	Not Mature	F3
Achatinella	lila	2009	2009-09-11	2009-09-11	2009	2.94	Keiki		0	2.61	Extra snails 2	2013-09-10	Not Mature	F3
Achatinella	lila	2009	2009-09-11	2009-09-11	2009	2.61	Keiki		0	1.69	Extra snails 2	2013-09-10	Not Mature	F3
Achatinella	lila	2009	2009-09-11	2009-09-11	2009	2.58	Keiki		0	2.21	Extra snails 2	2013-09-10	Not Mature	F3
Achatinella	lila	2009	2009-09-15	2009-08-08 08:28:14	2009	3.64	Keiki	0.64	0.103143	2.62	LD keiki 3	2013-08-07 08:28:14	Not Mature	F3
Achatinella	lila	2009	2009-09-18	2009-06-06 11:17:38	2009	4.76	Keiki	1.76	0.283642	3.54	HD keiki 1	2013-06-05 11:17:38	Not Mature	F3
Achatinella	lila	2009	2009-09-18	2009-07-31 18:21:10	2009	3.82	Keiki	0.82	0.132151	2.72	Adults 1	2013-07-30 18:21:10	Not Mature	F3
Achatinella	lila	2009	2009-09-18	2009-08-01 08:28:14	2009	3.81	Keiki	0.81	0.13054	3.02	LD keiki 1	2013-07-31 08:28:14	Not Mature	F3
Achatinella	lila	2009	2009-09-18	2009-08-13 16:56:28	2009	3.6	Keiki	0.6	0.0966962	2.73	HD keiki 1	2013-08-12 16:56:28	Not Mature	F3
Achatinella	lila	2009	2009-09-18	2009-08-30 18:21:10	2009	3.31	Keiki	0.31	0.0499597	2.51	HD keiki 1	2013-08-29 18:21:10	Not Mature	F3
Achatinella	lila	2009	2009-09-18	2009-09-18	2009	2.91	Keiki		0	2.11	HD keiki 1	2013-09-17	Not Mature	F3
Achatinella	lila	2009	2009-09-21	2006-04-22 23:45:36	2006	14.07	NonKeiki	4.57	3.41647	9.91	Adults 1	2010-04-21 23:45:36	Not Mature	F2
Achatinella	lila	2009	2009-09-21	2009-02-21 05:38:49	2009	6.6	Keiki	3.6	0.580177	5.35	HD keiki 2	2013-02-20 05:38:49	Not Mature	F3
Achatinella	lila	2009	2009-09-21	2009-06-03 14:07:03	2009	4.86	Keiki	1.86	0.299758	3.37	HD keiki 2	2013-06-02 14:07:03	Not Mature	F3
Achatinella	lila	2009	2009-09-21	2009-06-12 09:52:56	2009	4.71	Keiki	1.71	0.275584	3.75	HD keiki 3	2013-06-11 09:52:56	Not Mature	F3
Achatinella	lila	2009	2009-09-21	2009-08-25 12:42:21	2009	3.45	Keiki	0.45	0.0725222	2.7	LD keiki 2	2013-08-24 12:42:21	Not Mature	F3
Achatinella	lila	2009	2009-09-21	2009-09-18 15:31:45	2009	3.04	Keiki	0.04	0.00644641	2.22	LD keiki 2	2013-09-17 15:31:45	Not Mature	F3
Achatinella	lila	2009	2009-09-23	2008-02-06 07:55:12	2008	10.69	NonKeiki	1.19	1.62923	7.56	Extra snails 1	2012-02-05 07:55:12	Not Mature	F2
Achatinella	lila	2009	2009-09-23	2009-07-14 09:52:56	2009	4.2	Keiki	1.2	0.193392	2.96	LD keiki 1	2013-07-13 09:52:56	Not Mature	F3
Achatinella	lila	2009	2009-09-23	2009-09-14 04:14:07	2009	3.15	Keiki	0.15	0.0241741	2.61	LD keiki 2	2013-09-13 04:14:07	Not Mature	F3
Achatinella	lila	2009	2009-09-28	2009-01-05 02:49:24	2009	7.52	Keiki	4.52	0.728445	4.85	HD keiki 2	2013-01-04 02:49:24	Not Mature	F3
Achatinella	lila	2009	2009-09-28	2009-05-08 15:31:45	2009	5.42	Keiki	2.42	0.390008	3.55	HD keiki 2	2013-05-07 15:31:45	Not Mature	F3
Achatinella	lila	2009	2009-09-28	2009-08-11 22:35:17	2009	3.8	Keiki	0.8	0.128928	2.7	HD keiki 2	2013-08-10 22:35:17	Not Mature	F3
Achatinella	lila	2009	2009-09-28	2009-08-21 08:28:14	2009	3.64	Keiki	0.64	0.103143	2.43	HD keiki 2	2013-08-20 08:28:14	Not Mature	F3
Achatinella	lila	2009	2009-09-28	2009-09-13 21:10:35	2009	3.24	Keiki	0.24	0.0386785	2.99	HD keiki 2	2013-09-12 21:10:35	Not Mature	F3
Achatinella	lila	2009	2009-09-28	2009-09-23 21:10:35	2009	3.07	Keiki	0.07	0.0112812	2.64	HD keiki 2	2013-09-22 21:10:35	Not Mature	F3
Achatinella	lila	2009	2009-09-29	2009-08-13 12:42:21	2009	3.79	Keiki	0.79	0.127317	2.99	HD keiki 2	2013-08-12 12:42:21	Not Mature	F3
Achatinella	lila	2009	2009-10-10	2006-06-21 12:28:48	2006	13.86	NonKeiki	4.36	3.30542	9.88	HD keiki 1	2010-06-20 12:28:48	Not Mature	F2
Achatinella	lila	2009	2009-10-10	2007-01-15 23:02:24	2007	12.78	NonKeiki	3.28	2.73436	9.01	Extra snails adults	2011-01-14 23:02:24	Not Mature	F2
Achatinella	lila	2009	2009-10-10	2009-09-18 19:45:52	2009	3.36	Keiki	0.36	0.0580177	2.78	Extra snails 2	2013-09-17 19:45:52	Not Mature	F3
Achatinella	lila	2009	2009-10-15	2009-10-08 12:42:21	2009	3.11	Keiki	0.11	0.0177276	2.89	HD keiki 2	2013-10-07 12:42:21	Not Mature	F3
Achatinella	lila	2009	2009-10-16	2009-05-14 21:10:35	2009	5.62	Keiki	2.62	0.42224	4.89	HD keiki 1	2013-05-13 21:10:35	Not Mature	F3
Achatinella	lila	2009	2009-10-16	2009-08-15 05:38:49	2009	4.05	Keiki	1.05	0.169218	3.91	HD keiki 1	2013-08-14 05:38:49	Not Mature	F3
Achatinella	lila	2009	2009-10-16	2009-08-24 01:24:42	2009	3.9	Keiki	0.9	0.145044	3.32	HD keiki 2	2013-08-23 01:24:42	Not Mature	F3
Achatinella	lila	2009	2009-10-16	2009-09-21 07:03:31	2009	3.42	Keiki	0.42	0.0676873	3.21	HD keiki 2	2013-09-20 07:03:31	Not Mature	F3
Achatinella	lila	2009	2009-10-16	2009-10-09 12:42:21	2009	3.11	Keiki	0.11	0.0177276	2.46	HD keiki 1	2013-10-08 12:42:21	Not Mature	F3
Achatinella	lila	2009	2009-10-16	2009-10-16	2009	2.86	Keiki		0	2.33	HD keiki 2	2013-10-15	Not Mature	F3
Achatinella	lila	2009	2009-10-23	2008-11-27 14:07:03	2008	8.6	Keiki	5.6	0.902498	6.98	HD keiki 2	2012-11-26 14:07:03	Not Mature	F3
Achatinella	lila	2009	2009-10-23	2009-04-18 22:35:17	2009	6.18	Keiki	3.18	0.51249	5.17	HD keiki 2	2013-04-17 22:35:17	Not Mature	F3
Achatinella	lila	2009	2009-10-23	2009-07-24 09:52:56	2009	4.54	Keiki	1.54	0.248187	4.19	HD keiki 2	2013-07-23 09:52:56	Not Mature	F3
Achatinella	lila	2009	2009-10-23	2009-08-20 11:17:38	2009	4.08	Keiki	1.08	0.174053	3.62	HD keiki 2	2013-08-19 11:17:38	Not Mature	F3
Achatinella	lila	2009	2009-10-23	2009-08-31 01:24:42	2009	3.9	Keiki	0.9	0.145044	3.44	HD keiki 2	2013-08-30 01:24:42	Not Mature	F3
Achatinella	lila	2009	2009-10-23	2009-09-05 22:35:17	2009	3.8	Keiki	0.8	0.128928	3.74	HD keiki 2	2013-09-04 22:35:17	Not Mature	F3
Achatinella	lila	2009	2009-10-23	2009-09-28 21:10:35	2009	3.41	Keiki	0.41	0.0660757	3.5	HD keiki 2	2013-09-27 21:10:35	Not Mature	F3
Achatinella	lila	2009	2009-10-23	2009-10-14 18:21:10	2009	3.14	Keiki	0.14	0.0225624	3.14	HD keiki 2	2013-10-13 18:21:10	Not Mature	F3
Achatinella	lila	2009	2009-10-24	2006-03-04	2006	14.5	NonKeiki	5	3.64384	9.74	Adults 1	2010-03-03	Not Mature	F2
Achatinella	lila	2009	2009-10-31	2006-04-30 04:19:12	2006	14.24	NonKeiki	4.74	3.50636	9.4	LD keiki 2	2010-04-29 04:19:12	Not Mature	F2
Achatinella	lila	2009	2009-10-31	2009-07-23 14:07:03	2009	4.69	Keiki	1.69	0.272361	4.16	HD keiki 3	2013-07-22 14:07:03	Not Mature	F3
Achatinella	lila	2009	2009-10-31	2009-07-28 21:10:35	2009	4.6	Keiki	1.6	0.257857	4.66	HD keiki 1	2013-07-27 21:10:35	Not Mature	F3
Achatinella	lila	2009	2009-10-31	2009-08-04 08:28:14	2009	4.49	Keiki	1.49	0.240129	4.29	LD keiki 2	2013-08-03 08:28:14	Not Mature	F3
Achatinella	lila	2009	2009-10-31	2009-08-04 22:35:17	2009	4.48	Keiki	1.48	0.238517	4.2	LD keiki 2	2013-08-03 22:35:17	Not Mature	F3
Achatinella	lila	2009	2009-10-31	2009-09-12 18:21:10	2009	3.82	Keiki	0.82	0.132151	3.38	HD keiki 1	2013-09-11 18:21:10	Not Mature	F3
Achatinella	lila	2009	2009-10-31	2009-09-24 12:42:21	2009	3.62	Keiki	0.62	0.0999194	3.48	HD keiki 3	2013-09-23 12:42:21	Not Mature	F3
Achatinella	lila	2009	2009-10-31	2009-10-31	2009	2.74	Keiki		0	2.88	LD keiki 1	2013-10-30	Not Mature	F3
Achatinella	lila	2009	2009-10-31	2009-10-31	2009	2.5	Keiki		0	2.5	Adults 3	2013-10-30	Not Mature	F3
Achatinella	lila	2009	2009-10-31	2009-10-31	2009	2.36	Keiki		0	2.51	HD keiki 3	2013-10-30	Not Mature	F3
Achatinella	lila	2009	2009-10-31	2009-10-31	2009	1.61	Keiki		0	1.5	HD keiki 2	2013-10-30	Not Mature	F3
Achatinella	lila	2009	2009-11-02	2009-07-25	2009	4.7	Keiki	1.7	0.273973	4.24	Extra snails 2	2013-07-24	Not Mature	F3
Achatinella	lila	2009	2009-11-02	2009-08-21 15:31:45	2009	4.23	Keiki	1.23	0.198227	3.92	Extra snails 2	2013-08-20 15:31:45	Not Mature	F3
Achatinella	lila	2009	2009-11-02	2009-08-29 07:03:31	2009	4.1	Keiki	1.1	0.177276	4.03	Extra snails 2	2013-08-28 07:03:31	Not Mature	F3
Achatinella	lila	2009	2009-11-02	2009-09-22 09:52:56	2009	3.69	Keiki	0.69	0.111201	4	Extra snails 2	2013-09-21 09:52:56	Not Mature	F3
Achatinella	lila	2009	2009-11-02	2009-09-22 09:52:56	2009	3.69	Keiki	0.69	0.111201	3.67	Extra snails 2	2013-09-21 09:52:56	Not Mature	F3
Achatinella	lila	2009	2009-11-02	2009-09-26 12:42:21	2009	3.62	Keiki	0.62	0.0999194	2.95	Extra snails 2	2013-09-25 12:42:21	Not Mature	F3
Achatinella	lila	2009	2009-11-02	2009-09-30 01:24:42	2009	3.56	Keiki	0.56	0.0902498	3.16	Extra snails 2	2013-09-29 01:24:42	Not Mature	F3
Achatinella	lila	2009	2009-11-02	2009-10-02 09:52:56	2009	3.52	Keiki	0.52	0.0838034	3.39	Extra snails 2	2013-10-01 09:52:56	Not Mature	F3
Achatinella	lila	2009	2009-11-02	2009-10-03 14:07:03	2009	3.5	Keiki	0.5	0.0805802	2.91	Extra snails 2	2013-10-02 14:07:03	Not Mature	F3
Achatinella	lila	2009	2009-11-02	2009-10-11 05:38:49	2009	3.37	Keiki	0.37	0.0596293	3.24	Extra snails 2	2013-10-10 05:38:49	Not Mature	F3
Achatinella	lila	2009	2009-11-02	2009-10-13	2009	3.34	Keiki	0.34	0.0547945	3.19	Extra snails 2	2013-10-12	Not Mature	F3
Achatinella	lila	2009	2009-11-02	2009-10-30 15:31:45	2009	3.04	Keiki	0.04	0.00644641	3.94	Extra snails 2	2013-10-29 15:31:45	Not Mature	F3
Achatinella	lila	2009	2009-11-06	2009-10-08 18:21:10	2009	3.48	Keiki	0.48	0.077357	3.38	LD keiki 2	2013-10-07 18:21:10	Not Mature	F3
Achatinella	lila	2009	2009-11-06	2009-10-24 15:31:45	2009	3.21	Keiki	0.21	0.0338437	3.27	LD keiki 1	2013-10-23 15:31:45	Not Mature	F3
Achatinella	lila	2009	2009-11-09	2007-12-05 07:40:48	2007	11.26	NonKeiki	1.76	1.93063	8.15	Extra snails 1	2011-12-04 07:40:48	Not Mature	F2
Achatinella	lila	2009	2009-11-12	2006-03-11 10:04:48	2006	14.56	NonKeiki	5.06	3.67556	9.84	Adults 1	2010-03-10 10:04:48	Not Mature	F2
Achatinella	lila	2009	2009-11-12	2006-09-03 01:12:00	2006	13.65	NonKeiki	4.15	3.19438	9.51	LD keiki 2	2010-09-02 01:12:00	Not Mature	F2
Achatinella	lila	2009	2009-11-13	2006-05-20 21:36:00	2006	14.2	NonKeiki	4.7	3.48521	9.89	Adults 3	2010-05-19 21:36:00	Not Mature	F2
Achatinella	lila	2009	2009-11-13	2009-09-22 05:38:49	2009	3.88	Keiki	0.88	0.141821	3.75	HD keiki 3	2013-09-21 05:38:49	Not Mature	F3
Achatinella	lila	2009	2009-11-24	2009-11-01 15:31:45	2009	3.38	Keiki	0.38	0.0612409	3.23	LD keiki 1	2013-10-31 15:31:45	Not Mature	F3
Achatinella	lila	2009	2009-11-25	2006-09-10 06:14:24	2006	13.68	NonKeiki	4.18	3.21025	9.24	HD keiki 2	2010-09-09 06:14:24	Not Mature	F2
Achatinella	lila	2009	2009-11-25	2008-11-14 02:49:24	2008	9.39	Keiki	6.39	1.02981	7.48	Extra snails 3	2012-11-13 02:49:24	Not Mature	F3
Achatinella	lila	2009	2009-11-25	2009-02-08 14:07:03	2009	7.92	Keiki	4.92	0.792909	6.84	HD keiki 2	2013-02-07 14:07:03	Not Mature	F3
Achatinella	lila	2009	2009-11-25	2009-06-19 04:14:07	2009	5.7	Keiki	2.7	0.435133	4.74	Extra snails 3	2013-06-18 04:14:07	Not Mature	F3
Achatinella	lila	2009	2009-11-25	2009-08-22 21:10:35	2009	4.6	Keiki	1.6	0.257857	4.18	Extra snails 3	2013-08-21 21:10:35	Not Mature	F3
Achatinella	lila	2009	2009-11-25	2009-09-18 08:28:14	2009	4.15	Keiki	1.15	0.185334	3.96	HD keiki 3	2013-09-17 08:28:14	Not Mature	F3
Achatinella	lila	2009	2009-11-25	2009-09-19 12:42:21	2009	4.13	Keiki	1.13	0.182111	4.03	HD keiki 2	2013-09-18 12:42:21	Not Mature	F3
Achatinella	lila	2009	2009-11-25	2009-10-03 01:24:42	2009	3.9	Keiki	0.9	0.145044	3.83	HD keiki 1	2013-10-02 01:24:42	Not Mature	F3
Achatinella	lila	2009	2009-11-25	2009-10-13 01:24:42	2009	3.73	Keiki	0.73	0.117647	3.72	HD keiki 2	2013-10-12 01:24:42	Not Mature	F3
Achatinella	lila	2009	2009-11-25	2009-10-14 19:45:52	2009	3.7	Keiki	0.7	0.112812	3.36	HD keiki 1	2013-10-13 19:45:52	Not Mature	F3
Achatinella	lila	2009	2009-11-25	2009-10-16 14:07:03	2009	3.67	Keiki	0.67	0.107977	3.34	HD keiki 1	2013-10-15 14:07:03	Not Mature	F3
Achatinella	lila	2009	2009-11-25	2009-10-23 01:24:42	2009	3.56	Keiki	0.56	0.0902498	2.83	HD keiki 2	2013-10-22 01:24:42	Not Mature	F3
Achatinella	lila	2009	2009-11-25	2009-10-23 15:31:45	2009	3.55	Keiki	0.55	0.0886382	3.33	HD keiki 2	2013-10-22 15:31:45	Not Mature	F3
Achatinella	lila	2009	2009-11-25	2009-11-12 01:24:42	2009	3.22	Keiki	0.22	0.0354553	3.05	HD keiki 2	2013-11-11 01:24:42	Not Mature	F3
Achatinella	lila	2009	2009-12-07	2008-01-17 18:14:24	2008	11.18	NonKeiki	1.68	1.88833	7.85	Extra snails 1	2012-01-16 18:14:24	Not Mature	F2
Achatinella	lila	2009	2009-12-07	2008-02-15 17:02:24	2008	11.03	NonKeiki	1.53	1.80901	8.12	Extra snails 1	2012-02-14 17:02:24	Not Mature	F2
Achatinella	lila	2009	2009-12-11	2006-08-03 05:16:48	2006	13.96	NonKeiki	4.46	3.3583	9.3	HD keiki 2	2010-08-02 05:16:48	Not Mature	F2
Achatinella	lila	2009	2009-12-11	2006-09-03 02:24:00	2006	13.8	NonKeiki	4.3	3.2737	8.29	Adults 1	2010-09-02 02:24:00	Not Mature	F2
Achatinella	lila	2009	2009-12-11	2009-09-24 08:28:14	2009	4.32	Keiki	1.32	0.212732	3.39	HD keiki 2	2013-09-23 08:28:14	Not Mature	F3
Achatinella	lila	2009	2009-12-11	2009-09-29 01:24:42	2009	4.24	Keiki	1.24	0.199839	3.62	HD keiki 3	2013-09-28 01:24:42	Not Mature	F3
Achatinella	lila	2009	2009-12-11	2009-10-08 11:17:38	2009	4.08	Keiki	1.08	0.174053	2.56	HD keiki 3	2013-10-07 11:17:38	Not Mature	F3
Achatinella	lila	2009	2009-12-11	2009-10-17 07:03:31	2009	3.93	Keiki	0.93	0.149879	2.91	HD keiki 1	2013-10-16 07:03:31	Not Mature	F3
Achatinella	lila	2009	2009-12-11	2009-10-23 04:14:07	2009	3.83	Keiki	0.83	0.133763	3.02	HD keiki 2	2013-10-22 04:14:07	Not Mature	F3
Achatinella	lila	2009	2009-12-11	2009-11-01	2009	3.68	Keiki	0.68	0.109589	3.06	LD keiki 2	2013-10-31	Not Mature	F3
Achatinella	lila	2009	2009-12-11	2009-11-14 12:42:21	2009	3.45	Keiki	0.45	0.0725222	2.96	HD keiki 3	2013-11-13 12:42:21	Not Mature	F3
Achatinella	lila	2009	2009-12-11	2009-11-19 19:45:52	2009	3.36	Keiki	0.36	0.0580177	2.56	LD keiki 2	2013-11-18 19:45:52	Not Mature	F3
Achatinella	lila	2009	2009-12-11	2009-12-11	2009	2.82	Keiki		0	2.16	HD keiki 3	2013-12-10	Not Mature	F3
Achatinella	lila	2009	2009-12-11	2009-12-11	2009	2.73	Keiki		0	2.3	HD keiki 1	2013-12-10	Not Mature	F3
Achatinella	lila	2009	2009-12-24	2009-10-31 11:17:38	2009	3.91	Keiki	0.91	0.146656	3.27	Extra snails 2	2013-10-30 11:17:38	Not Mature	F3
Achatinella	lila	2009	2009-12-24	2009-11-13 09:52:56	2009	3.69	Keiki	0.69	0.111201	2.75	Extra snails 3	2013-11-12 09:52:56	Not Mature	F3
Achatinella	lila	2009	2009-12-24	2009-11-18 16:56:28	2009	3.6	Keiki	0.6	0.0966962	2.55	Extra snails 3	2013-11-17 16:56:28	Not Mature	F3
Achatinella	lila	2009	2009-12-29	2006-04-06 04:33:36	2006	14.67	NonKeiki	5.17	3.73373	9.18	LD keiki 2	2010-04-05 04:33:36	Not Mature	F2
Achatinella	lila	2009	2009-12-29	2009-10-27 15:31:45	2009	4.06	Keiki	1.06	0.17083	2.73	HD keiki 2	2013-10-26 15:31:45	Not Mature	F3
Achatinella	lila	2009	2009-12-29	2009-11-09	2009	3.85	Keiki	0.85	0.136986	2.92	HD keiki 1	2013-11-08	Not Mature	F3
Achatinella	lila	2009	2009-12-29	2009-11-10 18:21:10	2009	3.82	Keiki	0.82	0.132151	3.03	HD keiki 1	2013-11-09 18:21:10	Not Mature	F3
Achatinella	lila	2009	2009-12-29	2009-11-10 18:21:10	2009	3.82	Keiki	0.82	0.132151	2.9	HD keiki 1	2013-11-09 18:21:10	Not Mature	F3
Achatinella	lila	2009	2009-12-29	2009-11-20 04:14:07	2009	3.66	Keiki	0.66	0.106366	2.75	HD keiki 1	2013-11-19 04:14:07	Not Mature	F3
Achatinella	lila	2009	2009-12-29	2009-12-07 19:45:52	2009	3.36	Keiki	0.36	0.0580177	2.35	HD keiki 1	2013-12-06 19:45:52	Not Mature	F3
Achatinella	lila	2009	2009-12-29	2009-12-16 01:24:42	2009	3.22	Keiki	0.22	0.0354553	2.53	HD keiki 1	2013-12-15 01:24:42	Not Mature	F3
Achatinella	lila	2009	2009-12-29	2009-12-27 19:45:52	2009	3.02	Keiki	0.02	0.00322321	2.92	HD keiki 1	2013-12-26 19:45:52	Not Mature	F3
Achatinella	lila	2009	2009-12-29	2009-12-29	2009	2.91	Keiki		0	2.16	HD keiki 1	2013-12-28	Not Mature	F3
Achatinella	lila	2010	2010-01-08	2008-05-15 14:38:24	2008	10.73	NonKeiki	1.23	1.65038	6.99	Extra snails 1	2012-05-14 14:38:24	Not Mature	F2
Achatinella	lila	2010	2010-01-08	2008-11-28 11:16:48	2008	9.71	NonKeiki	0.21	1.11104	6.89	Extra snails 1	2012-11-27 11:16:48	Not Mature	F3
Achatinella	lila	2010	2010-01-10	2010-01-10	2010	2.87	Keiki		0	2.32	LR Juve 1	2014-01-09	Not Mature	F3
Achatinella	lila	2010	2010-01-12	2006-03-20 07:26:24	2006	14.83	NonKeiki	5.33	3.81833	8.88	LD keiki 3	2010-03-19 07:26:24	Not Mature	F2
Achatinella	lila	2010	2010-01-12	2009-05-02 07:03:31	2009	7.33	Keiki	4.33	0.697824	5.26	HD keiki 3	2013-05-01 07:03:31	Not Mature	F3
Achatinella	lila	2010	2010-01-12	2009-08-19 16:56:28	2009	5.47	Keiki	2.47	0.398066	4.21	HD keiki 3	2013-08-18 16:56:28	Not Mature	F3
Achatinella	lila	2010	2010-01-12	2009-08-28 12:42:21	2009	5.32	Keiki	2.32	0.373892	4.07	HD keiki 3	2013-08-27 12:42:21	Not Mature	F3
Achatinella	lila	2010	2010-01-12	2009-10-08 02:49:24	2009	4.63	Keiki	1.63	0.262691	3.64	HD keiki 3	2013-10-07 02:49:24	Not Mature	F3
Achatinella	lila	2010	2010-01-12	2009-10-13 09:52:56	2009	4.54	Keiki	1.54	0.248187	3.69	HD keiki 3	2013-10-12 09:52:56	Not Mature	F3
Achatinella	lila	2010	2010-01-12	2009-11-13	2009	4.02	Keiki	1.02	0.164384	3.53	HD keiki 3	2013-11-12	Not Mature	F3
Achatinella	lila	2010	2010-01-12	2009-11-13 14:07:03	2009	4.01	Keiki	1.01	0.162772	3.08	HD keiki 3	2013-11-12 14:07:03	Not Mature	F3
Achatinella	lila	2010	2010-01-12	2009-11-30 15:31:45	2009	3.72	Keiki	0.72	0.116035	3.22	HD keiki 3	2013-11-29 15:31:45	Not Mature	F3
Achatinella	lila	2010	2010-01-12	2009-12-11 19:45:52	2009	3.53	Keiki	0.53	0.085415	2.89	LD keiki 3	2013-12-10 19:45:52	Not Mature	F3
Achatinella	lila	2010	2010-01-14	2009-10-30 02:49:24	2009	4.29	Keiki	1.29	0.207897	3.33	HD keiki 2	2013-10-29 02:49:24	Not Mature	F3
Achatinella	lila	2010	2010-01-14	2009-12-20 07:03:31	2009	3.42	Keiki	0.42	0.0676873	2.84	HD keiki 2	2013-12-19 07:03:31	Not Mature	F3
Achatinella	lila	2010	2010-01-14	2010-01-14	2010	2.71	Keiki		0	2.37	LD keiki 2	2014-01-13	Not Mature	F3
Achatinella	lila	2010	2010-01-15	2006-03-09 19:12:00	2006	14.9	NonKeiki	5.4	3.85534	9.24	HD keiki 1	2010-03-08 19:12:00	Not Mature	F2
Achatinella	lila	2010	2010-01-15	2006-04-27 01:12:00	2006	14.65	NonKeiki	5.15	3.72315	8.99	LD keiki 1	2010-04-26 01:12:00	Not Mature	F2
Achatinella	lila	2010	2010-01-15	2006-05-24 01:40:48	2006	14.51	NonKeiki	5.01	3.64912	8.63	HD keiki 1	2010-05-23 01:40:48	Not Mature	F2
Achatinella	lila	2010	2010-01-15	2006-08-28 13:40:48	2006	14.01	NonKeiki	4.51	3.38474	8.61	Adults 2	2010-08-27 13:40:48	Not Mature	F2
Achatinella	lila	2010	2010-01-15	2009-11-08 22:35:17	2009	4.14	Keiki	1.14	0.183723	3.27	HD keiki 1	2013-11-07 22:35:17	Not Mature	F3
Achatinella	lila	2010	2010-01-15	2009-12-14 19:45:52	2009	3.53	Keiki	0.53	0.085415	2.56	HD keiki 1	2013-12-13 19:45:52	Not Mature	F3
Achatinella	lila	2010	2010-01-15	2009-12-17 04:14:07	2009	3.49	Keiki	0.49	0.0789686	2.88	HD keiki 1	2013-12-16 04:14:07	Not Mature	F3
Achatinella	lila	2010	2010-01-15	2009-12-19 12:42:21	2009	3.45	Keiki	0.45	0.0725222	2.67	HD keiki 1	2013-12-18 12:42:21	Not Mature	F3
Achatinella	lila	2010	2010-01-15	2009-12-29 12:42:21	2009	3.28	Keiki	0.28	0.0451249	2.72	HD keiki 1	2013-12-28 12:42:21	Not Mature	F3
Achatinella	lila	2010	2010-01-24	2009-01-10 11:45:36	2009	9.57	NonKeiki	0.07	1.03701	6.67	Extra snails 2	2013-01-09 11:45:36	Not Mature	F3
Achatinella	lila	2010	2010-01-24	2009-03-17 15:31:45	2009	8.31	Keiki	5.31	0.855761	6.42	Extra snails 1	2013-03-16 15:31:45	Not Mature	F3
Achatinella	lila	2010	2010-01-24	2009-08-29 08:28:14	2009	5.51	Keiki	2.51	0.404512	4.28	Extra snails 2	2013-08-28 08:28:14	Not Mature	F3
Achatinella	lila	2010	2010-01-24	2009-11-04 09:52:56	2009	4.37	Keiki	1.37	0.22079	3.45	Extra snails 2	2013-11-03 09:52:56	Not Mature	F3
Achatinella	lila	2010	2010-01-24	2009-11-05 14:07:03	2009	4.35	Keiki	1.35	0.217566	3.66	Extra snails 2	2013-11-04 14:07:03	Not Mature	F3
Achatinella	lila	2010	2010-01-24	2009-11-12 01:24:42	2009	4.24	Keiki	1.24	0.199839	3.02	Extra snails 2	2013-11-11 01:24:42	Not Mature	F3
Achatinella	lila	2010	2010-01-24	2009-12-10 21:10:35	2009	3.75	Keiki	0.75	0.12087	2.78	Extra snails 2	2013-12-09 21:10:35	Not Mature	F3
Achatinella	lila	2010	2010-01-24	2009-12-30 21:10:35	2009	3.41	Keiki	0.41	0.0660757	2.67	Extra snails 2	2013-12-29 21:10:35	Not Mature	F3
Achatinella	lila	2010	2010-01-24	2010-01-04 14:07:03	2010	3.33	Keiki	0.33	0.0531829	2.57	Extra snails 2	2014-01-03 14:07:03	Not Mature	F3
Achatinella	lila	2010	2010-02-02	2009-04-30 22:35:17	2009	7.71	Keiki	4.71	0.759065	4.98	HD keiki 3	2013-04-29 22:35:17	Not Mature	F3
Achatinella	lila	2010	2010-02-02	2009-08-07 04:14:07	2009	6.04	Keiki	3.04	0.489927	4.08	HD keiki 3	2013-08-06 04:14:07	Not Mature	F3
Achatinella	lila	2010	2010-02-02	2009-10-06 18:21:10	2009	5.01	Keiki	2.01	0.323932	3.69	LD keiki 3	2013-10-05 18:21:10	Not Mature	F3
Achatinella	lila	2010	2010-02-02	2009-12-28 02:49:24	2009	3.61	Keiki	0.61	0.0983078	2.71	LD keiki 1	2013-12-27 02:49:24	Not Mature	F3
Achatinella	lila	2010	2010-02-02	2010-01-08 07:03:31	2010	3.42	Keiki	0.42	0.0676873	2.8	HD keiki 3	2014-01-07 07:03:31	Not Mature	F3
Achatinella	lila	2010	2010-02-02	2010-01-20 15:31:45	2010	3.21	Keiki	0.21	0.0338437	2.42	HD keiki 3	2014-01-19 15:31:45	Not Mature	F3
Achatinella	lila	2010	2010-02-02	2010-02-02	2010	2.99	Keiki		0	2.45	HD keiki 3	2014-02-01	Not Mature	F3
Achatinella	lila	2010	2010-02-02	2010-02-02	2010	2.6	Keiki		0	2.11	HD keiki 3	2014-02-01	Not Mature	F3
Achatinella	lila	2010	2010-02-02	2010-02-02	2010	1.98	Keiki		0	1.49	LD keiki 1	2014-02-01	Not Mature	F3
Achatinella	lila	2010	2010-02-02	2010-02-02	2010	1.63	Keiki		0	1.29	LD keiki 1	2014-02-01	Not Mature	F3
Achatinella	lila	2010	2010-02-05	2007-08-10 17:45:36	2007	12.32	NonKeiki	2.82	2.49112	7.47	Extra snails 1	2011-08-09 17:45:36	Not Mature	F2
Achatinella	lila	2010	2010-02-05	2007-10-26 22:33:36	2007	11.92	NonKeiki	2.42	2.27962	7.16	Extra snails 1	2011-10-25 22:33:36	Not Mature	F2
Achatinella	lila	2010	2010-02-05	2009-12-06 09:52:56	2009	4.03	Keiki	1.03	0.165995	3.35	HD keiki 1	2013-12-05 09:52:56	Not Mature	F3
Achatinella	lila	2010	2010-02-05	2009-12-08 04:14:07	2009	4	Keiki	1	0.16116	3.05	HD keiki 1	2013-12-07 04:14:07	Not Mature	F3
Achatinella	lila	2010	2010-02-05	2009-12-20 12:42:21	2009	3.79	Keiki	0.79	0.127317	2.85	HD keiki 1	2013-12-19 12:42:21	Not Mature	F3
Achatinella	lila	2010	2010-02-05	2010-01-14 19:45:52	2010	3.36	Keiki	0.36	0.0580177	2.36	HD keiki 1	2014-01-13 19:45:52	Not Mature	F3
Achatinella	lila	2010	2010-02-05	2010-01-21 21:10:35	2010	3.24	Keiki	0.24	0.0386785	2.32	HD keiki 1	2014-01-20 21:10:35	Not Mature	F3
Achatinella	lila	2010	2010-02-05	2010-02-05	2010	2.89	Keiki		0	2.06	HD keiki 1	2014-02-04	Not Mature	F3
Achatinella	lila	2010	2010-02-05	2010-02-05	2010	2.87	Keiki		0	2.33	HD keiki 1	2014-02-04	Not Mature	F3
Achatinella	lila	2010	2010-02-05	2010-02-05	2010	2.51	Keiki		0	2.02	HD keiki 1	2014-02-04	Not Mature	F3
Achatinella	lila	2010	2010-02-09	2009-11-19 05:38:49	2009	4.39	Keiki	1.39	0.224013	3.44	Extra snails 1	2013-11-18 05:38:49	Not Mature	F3
Achatinella	lila	2010	2010-02-18	2006-04-28 05:45:36	2006	14.82	NonKeiki	5.32	3.81304	10.14	No Juves 1	2010-04-27 05:45:36	Not Mature	F2
Achatinella	lila	2010	2010-02-18	2006-05-11 18:00:00	2006	14.75	NonKeiki	5.25	3.77603	10.8	No Juves 1	2010-05-10 18:00:00	Not Mature	F2
Achatinella	lila	2010	2010-02-18	2006-06-09 16:48:00	2006	14.6	NonKeiki	5.1	3.69671	9.07	Adults 3	2010-06-08 16:48:00	Not Mature	F2
Achatinella	lila	2010	2010-02-18	2006-08-16 06:00:00	2006	14.25	NonKeiki	4.75	3.51164	10.01	No Juves 1	2010-08-15 06:00:00	Not Mature	F2
Achatinella	lila	2010	2010-02-18	2006-12-21 15:07:12	2006	13.59	NonKeiki	4.09	3.16266	9.67	No Juves 1	2010-12-20 15:07:12	Not Mature	F2
Achatinella	lila	2010	2010-02-18	2010-02-10 08:28:14	2010	3.13	Keiki	0.13	0.0209508	3.18	HD keiki 1	2014-02-09 08:28:14	Not Mature	F3
Achatinella	lila	2010	2010-02-19	2006-09-30 15:21:36	2006	14.02	NonKeiki	4.52	3.39003	8.58	HD keiki 3	2010-09-29 15:21:36	Not Mature	F2
Achatinella	lila	2010	2010-02-19	2009-05-05 14:07:03	2009	7.92	Keiki	4.92	0.792909	5.76	HD keiki 3	2013-05-04 14:07:03	Not Mature	F3
Achatinella	lila	2010	2010-02-19	2009-09-23 04:14:07	2009	5.53	Keiki	2.53	0.407736	4.47	HD keiki 3	2013-09-22 04:14:07	Not Mature	F3
Achatinella	lila	2010	2010-02-19	2009-10-04 08:28:14	2009	5.34	Keiki	2.34	0.377115	4.64	HD keiki 3	2013-10-03 08:28:14	Not Mature	F3
Achatinella	lila	2010	2010-02-19	2009-10-20 19:45:52	2009	5.06	Keiki	2.06	0.33199	3.51	HD keiki 3	2013-10-19 19:45:52	Not Mature	F3
Achatinella	lila	2010	2010-02-19	2009-12-06 21:10:35	2009	4.26	Keiki	1.26	0.203062	3.36	HD keiki 3	2013-12-05 21:10:35	Not Mature	F3
Achatinella	lila	2010	2010-02-19	2009-12-10 09:52:56	2009	4.2	Keiki	1.2	0.193392	3.15	Adults 2	2013-12-09 09:52:56	Not Mature	F3
Achatinella	lila	2010	2010-02-19	2009-12-21 14:07:03	2009	4.01	Keiki	1.01	0.162772	3.04	HD keiki 3	2013-12-20 14:07:03	Not Mature	F3
Achatinella	lila	2010	2010-02-19	2009-12-24 12:42:21	2009	3.96	Keiki	0.96	0.154714	3.01	LD keiki 2	2013-12-23 12:42:21	Not Mature	F3
Achatinella	lila	2010	2010-02-19	2009-12-28 01:24:42	2009	3.9	Keiki	0.9	0.145044	2.54	LD keiki 2	2013-12-27 01:24:42	Not Mature	F3
Achatinella	lila	2010	2010-02-19	2009-12-31	2009	3.85	Keiki	0.85	0.136986	2.73	LD keiki 3	2013-12-30	Not Mature	F3
Achatinella	lila	2010	2010-02-19	2010-01-11 18:21:10	2010	3.65	Keiki	0.65	0.104754	2.37	HD keiki 3	2014-01-10 18:21:10	Not Mature	F3
Achatinella	lila	2010	2010-02-19	2010-01-17 15:31:45	2010	3.55	Keiki	0.55	0.0886382	2.41	HD keiki 3	2014-01-16 15:31:45	Not Mature	F3
Achatinella	lila	2010	2010-02-19	2010-02-19	2010	2.75	Keiki		0	2.48	HD keiki 3	2014-02-18	Not Mature	F3
Achatinella	lila	2010	2010-02-19	2010-02-19	2010	2.12	Keiki		0	1.91	Adults 2	2014-02-18	Not Mature	F3
Achatinella	lila	2010	2010-03-04	2006-08-14 19:26:24	2006	14.33	NonKeiki	4.83	3.55395	8.8	Adults 1	2010-08-13 19:26:24	Not Mature	F2
Achatinella	lila	2010	2010-03-04	2009-10-05 14:07:03	2009	5.54	Keiki	2.54	0.409347	4.62	LD keiki 3	2013-10-04 14:07:03	Not Mature	F3
Achatinella	lila	2010	2010-03-04	2010-01-01 05:38:49	2010	4.05	Keiki	1.05	0.169218	2.86	HD keiki 2	2013-12-31 05:38:49	Not Mature	F3
Achatinella	lila	2010	2010-03-04	2010-01-09 11:17:38	2010	3.91	Keiki	0.91	0.146656	2.88	LD keiki 2	2014-01-08 11:17:38	Not Mature	F3
Achatinella	lila	2010	2010-03-04	2010-01-20 15:31:45	2010	3.72	Keiki	0.72	0.116035	2.76	LD keiki 2	2014-01-19 15:31:45	Not Mature	F3
Achatinella	lila	2010	2010-03-04	2010-01-21 19:45:52	2010	3.7	Keiki	0.7	0.112812	3.01	HD keiki 2	2014-01-20 19:45:52	Not Mature	F3
Achatinella	lila	2010	2010-03-04	2010-03-04	2010	2.2	Keiki		0	1.57	HD keiki 2	2014-03-03	Not Mature	F3
Achatinella	lila	2010	2010-03-05	2010-01-11 01:24:42	2010	3.9	Keiki	0.9	0.145044	2.67	LD keiki 1	2014-01-10 01:24:42	Not Mature	F3
Achatinella	lila	2010	2010-03-05	2010-03-05	2010	2.91	Keiki		0	2.48	LD keiki 1	2014-03-04	Not Mature	F3
Achatinella	lila	2010	2010-03-05	2010-03-05	2010	2.57	Keiki		0	2.08	LD keiki 1	2014-03-04	Not Mature	F3
Achatinella	lila	2010	2010-03-05	2010-03-05	2010	1.27	Keiki		0	1.39	LD keiki 1	2014-03-04	Not Mature	F3
Achatinella	lila	2010	2010-03-20	2008-03-20 05:31:12	2008	11.39	NonKeiki	1.89	1.99937	8.43	Extra snails1	2012-03-19 05:31:12	Not Mature	F2
Achatinella	lila	2010	2010-03-20	2008-05-17 03:07:12	2008	11.09	NonKeiki	1.59	1.84074	6.61	Extra snails 1	2012-05-16 03:07:12	Not Mature	F2
Achatinella	lila	2010	2010-03-20	2008-09-23 10:33:36	2008	10.42	NonKeiki	0.92	1.48647	7.23	Extra snails 1	2012-09-22 10:33:36	Not Mature	F3
Achatinella	lila	2010	2010-03-20	2008-10-30 02:38:24	2008	10.23	NonKeiki	0.73	1.386	7.13	Extra snails 1	2012-10-29 02:38:24	Not Mature	F3
Achatinella	lila	2010	2010-03-20	2009-03-05 14:07:03	2009	9.45	Keiki	6.45	1.03948	6.21	Extra snails1	2013-03-04 14:07:03	Not Mature	F3
Achatinella	lila	2010	2010-03-20	2009-03-13 19:45:52	2009	9.31	Keiki	6.31	1.01692	6.84	Extra snails 1	2013-03-12 19:45:52	Not Mature	F3
Achatinella	lila	2010	2010-03-20	2009-03-25 14:07:03	2009	9.11	Keiki	6.11	0.98469	5.84	Extra snails1	2013-03-24 14:07:03	Not Mature	F3
Achatinella	lila	2010	2010-03-20	2009-03-27 22:35:17	2009	9.07	Keiki	6.07	0.978243	5.83	Extra snails1	2013-03-26 22:35:17	Not Mature	F3
Achatinella	lila	2010	2010-03-20	2009-04-08 16:56:28	2009	8.87	Keiki	5.87	0.946011	6.31	Extra snails 1	2013-04-07 16:56:28	Not Mature	F3
Achatinella	lila	2010	2010-03-20	2009-05-16 22:35:17	2009	8.22	Keiki	5.22	0.841257	5.33	Extra snails 1	2013-05-15 22:35:17	Not Mature	F3
Achatinella	lila	2010	2010-03-20	2009-11-21 18:21:10	2009	5.01	Keiki	2.01	0.323932	4.36	Extra snails 1	2013-11-20 18:21:10	Not Mature	F3
Achatinella	lila	2010	2010-03-20	2010-01-11 08:28:14	2010	4.15	Keiki	1.15	0.185334	3.11	Extra snails1	2014-01-10 08:28:14	Not Mature	F3
Achatinella	lila	2010	2010-03-20	2010-01-14 07:03:31	2010	4.1	Keiki	1.1	0.177276	3.49	HD keiki 1	2014-01-13 07:03:31	Not Mature	F3
Achatinella	lila	2010	2010-03-20	2010-01-24 21:10:35	2010	3.92	Keiki	0.92	0.148268	3.18	Adults 2	2014-01-23 21:10:35	Not Mature	F3
Achatinella	lila	2010	2010-03-20	2010-03-20	2010	2.97	Keiki		0	2.34	Extra snails1	2014-03-19	Not Mature	F3
Achatinella	lila	2010	2010-03-20	2010-03-20	2010	2.94	Keiki		0	2.51	Extra snails 1	2014-03-19	Not Mature	F3
Achatinella	lila	2010	2010-03-20	2010-03-20	2010	2.54	Keiki		0	2.06	Adults 3	2014-03-19	Not Mature	F3
Achatinella	lila	2010	2010-03-22	2009-08-22 05:38:49	2009	6.6	Keiki	3.6	0.580177	3.82	HD keiki 3	2013-08-21 05:38:49	Not Mature	F3
Achatinella	lila	2010	2010-03-22	2010-01-02 18:21:10	2010	4.33	Keiki	1.33	0.214343	3.22	HD keiki 3	2014-01-01 18:21:10	Not Mature	F3
Achatinella	lila	2010	2010-04-02	2006-06-21 19:40:48	2006	14.76	NonKeiki	5.26	3.78132	8.96	Adults 1	2010-06-20 19:40:48	Not Mature	F2
Achatinella	lila	2010	2010-04-02	2006-08-07 03:21:36	2006	14.52	NonKeiki	5.02	3.65441	9.14	Adults 1	2010-08-06 03:21:36	Not Mature	F2
Achatinella	lila	2010	2010-04-02	2006-09-14 17:45:36	2006	14.32	NonKeiki	4.82	3.54866	8.38	LD keiki 2	2010-09-13 17:45:36	Not Mature	F2
Achatinella	lila	2010	2010-04-02	2010-03-06 12:42:21	2010	3.45	Keiki	0.45	0.0725222	2.64	LD keiki 2	2014-03-05 12:42:21	Not Mature	F3
Achatinella	lila	2010	2010-04-05	2006-08-06 06:43:12	2006	14.54	NonKeiki	5.04	3.66499	9.01	HD keiki 1	2010-08-05 06:43:12	Not Mature	F2
Achatinella	lila	2010	2010-04-05	2006-11-10 18:43:12	2006	14.04	NonKeiki	4.54	3.4006	8.35	LD keiki 1	2010-11-09 18:43:12	Not Mature	F2
Achatinella	lila	2010	2010-04-05	2009-08-28	2009	6.74	Keiki	3.74	0.60274	4.82	HD keiki 1	2013-08-27	Not Mature	F3
Achatinella	lila	2010	2010-04-05	2010-03-08 22:35:17	2010	3.46	Keiki	0.46	0.0741338	2.82	HD keiki 3	2014-03-07 22:35:17	Not Mature	F3
Achatinella	lila	2010	2010-04-05	2010-03-29 12:42:21	2010	3.11	Keiki	0.11	0.0177276	2.16	HD keiki 3	2014-03-28 12:42:21	Not Mature	F3
Achatinella	lila	2010	2010-04-06	2010-02-06 18:21:10	2010	3.99	Keiki	0.99	0.159549	2.88	Extra snails 1	2014-02-05 18:21:10	Not Mature	F3
Achatinella	lila	2010	2010-04-06	2010-03-09 08:28:14	2010	3.47	Keiki	0.47	0.0757454	2.72	Extra snails 1	2014-03-08 08:28:14	Not Mature	F3
Achatinella	lila	2010	2010-04-06	2010-04-06	2010	2.83	Keiki		0	2.29	Extra snails 1	2014-04-05	Not Mature	F3
Achatinella	lila	2010	2010-04-06	2010-04-06	2010	2.59	Keiki		0	2.24	Extra snails 1	2014-04-05	Not Mature	F3
Achatinella	lila	2010	2010-04-09	2006-08-27 15:36:00	2006	14.45	NonKeiki	4.95	3.6174	8.27		2010-08-26 15:36:00	Not Mature	F2
Achatinella	lila	2010	2010-04-15	2010-02-26 22:35:17	2010	3.8	Keiki	0.8	0.128928	2.96	LD keiki 3	2014-02-25 22:35:17	Not Mature	F3
Achatinella	lila	2010	2010-04-16	2006-08-23 01:40:48	2006	14.51	NonKeiki	5.01	3.64912	7.9	LD keiki 1	2010-08-22 01:40:48	Not Mature	F2
Achatinella	lila	2010	2010-04-17	2007-06-21 03:36:00	2007	12.95	NonKeiki	3.45	2.82425	8.35	LD keiki 2	2011-06-20 03:36:00	Not Mature	F2
Achatinella	lila	2010	2010-04-17	2010-01-29 22:35:17	2010	4.31	Keiki	1.31	0.21112	3.14	HD keiki 2	2014-01-28 22:35:17	Not Mature	F3
Achatinella	lila	2010	2010-04-17	2010-02-27 18:21:10	2010	3.82	Keiki	0.82	0.132151	2.92	LD keiki 2	2014-02-26 18:21:10	Not Mature	F3
Achatinella	lila	2010	2010-04-17	2010-04-08 04:14:07	2010	3.15	Keiki	0.15	0.0241741	2.46	LD keiki 2	2014-04-07 04:14:07	Not Mature	F3
Achatinella	lila	2010	2010-04-17	2010-04-17	2010	2.82	Keiki		0	2.38	HD keiki 2	2014-04-16	Not Mature	F3
Achatinella	lila	2010	2010-04-19	2006-05-29 06:57:36	2006	14.97	NonKeiki	5.47	3.89236	8.78	HD keiki 3	2010-05-28 06:57:36	Not Mature	F2
Achatinella	lila	2010	2010-04-19	2006-06-02 03:36:00	2006	14.95	NonKeiki	5.45	3.88178	7.9	HD keiki 3	2010-06-01 03:36:00	Not Mature	F2
Achatinella	lila	2010	2010-04-19	2010-02-15 01:24:42	2010	4.07	Keiki	1.07	0.172442	2.8	HD keiki 1	2014-02-14 01:24:42	Not Mature	F3
Achatinella	lila	2010	2010-04-19	2010-03-15 07:03:31	2010	3.59	Keiki	0.59	0.0950846	2.6	HD keiki 1	2014-03-14 07:03:31	Not Mature	F3
Achatinella	lila	2010	2010-04-19	2010-03-31 18:21:10	2010	3.31	Keiki	0.31	0.0499597	2.59	HD keiki 3	2014-03-30 18:21:10	Not Mature	F3
Achatinella	lila	2010	2010-04-19	2010-04-15 11:17:38	2010	3.06	Keiki	0.06	0.00966962	2.49	HD keiki 1	2014-04-14 11:17:38	Not Mature	F3
Achatinella	lila	2010	2010-04-19	2010-04-18 09:52:56	2010	3.01	Keiki	0.01	0.0016116	2.37	HD keiki 1	2014-04-17 09:52:56	Not Mature	F3
Achatinella	lila	2010	2010-04-19	2010-04-19	2010	2.93	Keiki		0	2.28	HD keiki 1	2014-04-18	Not Mature	F3
Achatinella	lila	2010	2010-04-19	2010-04-19	2010	2.45	Keiki		0	1.81	Adults 3	2014-04-18	Not Mature	F3
Achatinella	lila	2010	2010-04-27	2009-03-15 12:57:36	2009	9.72	NonKeiki	0.22	1.11633	7.46	Extra snails 1	2013-03-14 12:57:36	Not Mature	F3
Achatinella	lila	2010	2010-04-27	2010-04-25 19:45:52	2010	3.02	Keiki	0.02	0.00322321	2.54	Extra snails 1	2014-04-24 19:45:52	Not Mature	F3
Achatinella	lila	2010	2010-04-27	2010-04-27	2010	2.83	Keiki		0	2.44	Extra snails 1	2014-04-26	Not Mature	F3
Achatinella	lila	2010	2010-04-29	2006-07-01 10:48:00	2006	14.85	NonKeiki	5.35	3.8289	8.55	Adults 3	2010-06-30 10:48:00	Not Mature	F2
Achatinella	lila	2010	2010-04-29	2010-04-16 15:31:45	2010	3.21	Keiki	0.21	0.0338437	2.61	HD keiki 3	2014-04-15 15:31:45	Not Mature	F3
Achatinella	lila	2010	2010-04-29	2010-04-29	2010	2.99	Keiki		0	2.25	HD keiki 3	2014-04-28	Not Mature	F3
Achatinella	lila	2010	2010-04-30	2009-08-14 04:14:07	2009	7.4	Keiki	4.4	0.709106	5.84	HD keiki 1	2013-08-13 04:14:07	Not Mature	F3
Achatinella	lila	2010	2010-04-30	2010-03-23 22:35:17	2010	3.63	Keiki	0.63	0.101531	2.5	LD keiki 2	2014-03-22 22:35:17	Not Mature	F3
Achatinella	lila	2010	2010-04-30	2010-04-22 22:35:17	2010	3.12	Keiki	0.12	0.0193392	2.45	HD keiki 1	2014-04-21 22:35:17	Not Mature	F3
Achatinella	lila	2010	2010-04-30	2010-04-30	2010	2.6	Keiki		0	2.2	LD keiki 3	2014-04-29	Not Mature	F3
Achatinella	lila	2010	2010-05-14	2009-11-16 18:21:10	2009	6.03	Keiki	3.03	0.488316	4	LD keiki 3	2013-11-15 18:21:10	Not Mature	F3
Achatinella	lila	2010	2010-05-14	2010-04-16 22:35:17	2010	3.46	Keiki	0.46	0.0741338	2.52	LD keiki 3	2014-04-15 22:35:17	Not Mature	F3
Achatinella	lila	2010	2010-05-14	2010-04-26 22:35:17	2010	3.29	Keiki	0.29	0.0467365	2.73	HD keiki 3	2014-04-25 22:35:17	Not Mature	F3
Achatinella	lila	2010	2010-05-14	2010-05-14	2010	2.85	Keiki		0	2.26	LD keiki 2	2014-05-13	Not Mature	F3
Achatinella	lila	2010	2010-05-15	2006-11-19 21:36:00	2006	14.2	NonKeiki	4.7	3.48521	8.8	LD keiki 1	2010-11-18 21:36:00	Not Mature	F2
Achatinella	lila	2010	2010-05-15	2010-04-19 02:49:24	2010	3.44	Keiki	0.44	0.0709106	2.64	HD keiki 1	2014-04-18 02:49:24	Not Mature	F3
Achatinella	lila	2010	2010-05-18	2009-04-20 23:31:12	2009	9.64	NonKeiki	0.14	1.07403	5.93	Extra snails 1	2013-04-19 23:31:12	Not Mature	F3
Achatinella	lila	2010	2010-05-18	2010-04-09 18:21:10	2010	3.65	Keiki	0.65	0.104754	2.59	Extra snails 1	2014-04-08 18:21:10	Not Mature	F3
Achatinella	lila	2010	2010-05-18	2010-04-09 18:21:10	2010	3.65	Keiki	0.65	0.104754	2.17	Extra snails 1	2014-04-08 18:21:10	Not Mature	F3
Achatinella	lila	2010	2010-05-18	2010-05-09 04:14:07	2010	3.15	Keiki	0.15	0.0241741	2.17	Extra snails 1	2014-05-08 04:14:07	Not Mature	F3
Achatinella	lila	2010	2010-05-28	2009-12-21 08:28:14	2009	5.68	Keiki	2.68	0.43191	4.72	HR Juve 2	2013-12-20 08:28:14	Not Mature	F3
Achatinella	lila	2010	2010-05-28	2010-04-01 12:42:21	2010	3.96	Keiki	0.96	0.154714	2.75	HR Juve 1	2014-03-31 12:42:21	Not Mature	F3
Achatinella	lila	2010	2010-05-28	2010-05-04 11:17:38	2010	3.4	Keiki	0.4	0.0644641	2.5	HR Juve 2	2014-05-03 11:17:38	Not Mature	F3
Achatinella	lila	2010	2010-06-02	2010-02-16 16:56:28	2010	4.79	Keiki	1.79	0.288477	3.94	Extra snails 1	2014-02-15 16:56:28	Not Mature	F3
Achatinella	lila	2010	2010-06-02	2010-05-06 12:42:21	2010	3.45	Keiki	0.45	0.0725222	2.48	Extra snails 1	2014-05-05 12:42:21	Not Mature	F3
Achatinella	lila	2010	2010-06-09	2010-06-09	2010	2.65	Keiki		0	2.2	No Juve 2	2014-06-08	Not Mature	F3
Achatinella	lila	2010	2010-06-10	2006-09-10 09:36:00	2006	14.7	NonKeiki	5.2	3.74959	9.24	LR Juve 2	2010-09-09 09:36:00	Not Mature	F2
Achatinella	lila	2010	2010-06-10	2009-09-10 15:31:45	2009	7.63	Keiki	4.63	0.746172	5.79	LR Juve 3	2013-09-09 15:31:45	Not Mature	F3
Achatinella	lila	2010	2010-06-10	2010-05-22 04:14:07	2010	3.32	Keiki	0.32	0.0515713	2.59	HR Juve 3	2014-05-21 04:14:07	Not Mature	F3
Achatinella	lila	2010	2010-06-10	2010-06-10	2010	2.23	Keiki		0	1.87	HR Juve 3	2014-06-09	Not Mature	F3
Achatinella	lila	2010	2010-06-28	2010-04-24 21:10:35	2010	4.09	Keiki	1.09	0.175665	3.34	LR Juve 2	2014-04-23 21:10:35	Not Mature	F3
Achatinella	lila	2010	2010-06-28	2010-06-28	2010	2.47	Keiki		0	2.09	LR Juve 2	2014-06-27	Not Mature	F3
Achatinella	lila	2010	2010-07-01	2008-04-09 05:45:36	2008	11.82	NonKeiki	2.32	2.22674	7.74	Extra snails 1	2012-04-08 05:45:36	Not Mature	F2
Achatinella	lila	2010	2010-07-01	2008-05-23 15:07:12	2008	11.59	NonKeiki	2.09	2.10512	7.84	Extra snails 1	2012-05-22 15:07:12	Not Mature	F2
Achatinella	lila	2010	2010-07-01	2008-12-18 01:40:48	2008	10.51	NonKeiki	1.01	1.53405	7.11	Extra snails 1	2012-12-17 01:40:48	Not Mature	F3
Achatinella	lila	2010	2010-07-01	2009-08-30 21:10:35	2009	8.17	Keiki	5.17	0.833199	6.71	Extra snails 1	2013-08-29 21:10:35	Not Mature	F3
Achatinella	lila	2010	2010-07-01	2010-06-29 19:45:52	2010	3.02	Keiki	0.02	0.00322321	2.32	Extra snails 1	2014-06-28 19:45:52	Not Mature	F3
Achatinella	lila	2010	2010-07-06	2010-07-06	2010	2.58	Keiki		0	1.95	No Juves 2	2014-07-05	Not Mature	F3
Achatinella	lila	2010	2010-07-06	2010-07-06	2010	2.58	Keiki		0	2.05	HR Juve 2	2014-07-05	Not Mature	F3
Achatinella	lila	2010	2010-07-06	2010-07-06	2010	2.46	Keiki		0	1.9	HR Juve 1	2014-07-05	Not Mature	F3
Achatinella	lila	2010	2010-07-07	2010-05-25 01:24:42	2010	3.73	Keiki	0.73	0.117647	2.91	LR Juve 3	2014-05-24 01:24:42	Not Mature	F3
Achatinella	lila	2010	2010-07-07	2010-06-27 14:07:03	2010	3.16	Keiki	0.16	0.0257857	2.41	LR Juve 3	2014-06-26 14:07:03	Not Mature	F3
Achatinella	lila	2010	2010-07-07	2010-07-07	2010	2.71	Keiki		0	2.21	LR Juve 3	2014-07-06	Not Mature	F3
Achatinella	lila	2010	2010-07-19	2009-12-12 18:21:10	2009	6.71	Keiki	3.71	0.597905	5.1	HR Juve 2	2013-12-11 18:21:10	Not Mature	F3
Achatinella	lila	2010	2010-07-19	2010-05-31 04:14:07	2010	3.83	Keiki	0.83	0.133763	2.71	HR Juve 1	2014-05-30 04:14:07	Not Mature	F3
Achatinella	lila	2010	2010-07-19	2010-06-15 11:17:38	2010	3.57	Keiki	0.57	0.0918614	2.9	LR Juve 1	2014-06-14 11:17:38	Not Mature	F3
Achatinella	lila	2010	2010-07-19	2010-06-21 22:35:17	2010	3.46	Keiki	0.46	0.0741338	2.64	Extra snails 1	2014-06-20 22:35:17	Not Mature	F3
Achatinella	lila	2010	2010-07-19	2010-06-25 11:17:38	2010	3.4	Keiki	0.4	0.0644641	2.43	HR Juve 3	2014-06-24 11:17:38	Not Mature	F3
Achatinella	lila	2010	2010-07-19	2010-07-09	2010	3.17	Keiki	0.17	0.0273973	2.38	LR Juve 2	2014-07-08	Not Mature	F3
Achatinella	lila	2010	2010-07-19	2010-07-19	2010	2.75	Keiki		0	2.34	Extra snails 1	2014-07-18	Not Mature	F3
Achatinella	lila	2010	2010-07-19	2010-07-19	2010	2.37	Keiki		0	1.93	LR Juve 3	2014-07-18	Not Mature	F3
Achatinella	lila	2010	2010-07-19	2010-07-19	2010	2.05	Keiki		0	1.57	LR Juve 3	2014-07-18	Not Mature	F3
Achatinella	lila	2010	2010-08-02	2006-11-21 16:48:00	2006	14.6	NonKeiki	5.1	3.69671	9.79	No Juves 3	2010-11-20 16:48:00	Not Mature	F2
Achatinella	lila	2010	2010-08-02	2010-07-17 16:56:28	2010	3.26	Keiki	0.26	0.0419017	3.08	No Juves 3	2014-07-16 16:56:28	Not Mature	F3
Achatinella	lila	2010	2010-08-02	2010-07-21 05:38:49	2010	3.2	Keiki	0.2	0.0322321	3.25	LR Juve 3	2014-07-20 05:38:49	Not Mature	F3
Achatinella	lila	2010	2010-08-03	2010-06-19 07:03:31	2010	3.76	Keiki	0.76	0.122482	3.27	LR Juve 1	2014-06-18 07:03:31	Not Mature	F3
Achatinella	lila	2010	2010-08-03	2010-06-28 02:49:24	2010	3.61	Keiki	0.61	0.0983078	3.5	Extra snails 1	2014-06-27 02:49:24	Not Mature	F3
Achatinella	lila	2010	2010-08-09	2010-07-23 12:42:21	2010	3.28	Keiki	0.28	0.0451249	2.83	Cuttle Bone 2	2014-07-22 12:42:21	Not Mature	F3
Achatinella	lila	2010	2010-08-17	2010-07-04 11:17:38	2010	3.74	Keiki	0.74	0.119259	3.2	HR Juve 2	2014-07-03 11:17:38	Not Mature	F3
Achatinella	lila	2010	2010-08-17	2010-07-05 15:31:45	2010	3.72	Keiki	0.72	0.116035	3.36	HR Juve 2	2014-07-04 15:31:45	Not Mature	F3
Achatinella	lila	2010	2010-08-17	2010-08-02 07:03:31	2010	3.25	Keiki	0.25	0.0402901	2.78	HR Juve 2	2014-08-01 07:03:31	Not Mature	F3
Achatinella	lila	2010	2010-08-17	2010-08-17	2010	2.82	Keiki		0	2.25	HR Juve 1	2014-08-16	Not Mature	F3
Achatinella	lila	2010	2010-08-18	2010-08-09 04:14:07	2010	3.15	Keiki	0.15	0.0241741	2.58	LR Juve 3	2014-08-08 04:14:07	Not Mature	F3
Achatinella	lila	2010	2010-08-31	2010-08-13 08:28:14	2010	3.3	Keiki	0.3	0.0483481	2.9	HR Juve 2	2014-08-12 08:28:14	Not Mature	F3
Achatinella	lila	2010	2010-08-31	2010-08-31	2010	2.95	Keiki		0	2.67	HR Juve 2	2014-08-30	Not Mature	F3
Achatinella	lila	2010	2010-08-31	2010-08-31	2010	2.87	Keiki		0	2.2	LR Juve 2	2014-08-30	Not Mature	F3
Achatinella	lila	2010	2010-09-02	2010-06-29 07:03:31	2010	4.1	Keiki	1.1	0.177276	3.61	HR Juve 1	2014-06-28 07:03:31	Not Mature	F3
Achatinella	lila	2010	2010-09-02	2010-08-18 07:03:31	2010	3.25	Keiki	0.25	0.0402901	2.92	HR Juve 1	2014-08-17 07:03:31	Not Mature	F3
Achatinella	lila	2010	2010-09-16	2010-08-30 12:42:21	2010	3.28	Keiki	0.28	0.0451249	2.7	HR Juve 1	2014-08-29 12:42:21	Not Mature	F3
Achatinella	lila	2010	2010-09-16	2010-09-08 22:35:17	2010	3.12	Keiki	0.12	0.0193392	2.65	LR Juve 1	2014-09-07 22:35:17	Not Mature	F3
Achatinella	lila	2010	2010-09-16	2010-09-14 05:38:49	2010	3.03	Keiki	0.03	0.00483481	2.5	LR Juve 1	2014-09-13 05:38:49	Not Mature	F3
Achatinella	lila	2010	2010-09-16	2010-09-16	2010	1.7	Keiki		0	1.4	LR Juve 1	2014-09-15	Not Mature	F3
Achatinella	lila	2010	2010-09-17	2008-05-10 22:04:48	2008	12.06	NonKeiki	2.56	2.35364	8	Extra snails 1	2012-05-09 22:04:48	Not Mature	F2
Achatinella	lila	2010	2010-09-22	2010-07-23 09:52:56	2010	4.03	Keiki	1.03	0.165995	3.18	HR Juve 3	2014-07-22 09:52:56	Not Mature	F3
Achatinella	lila	2010	2010-09-22	2010-08-08 07:03:31	2010	3.76	Keiki	0.76	0.122482	3.37	HR Juve 3	2014-08-07 07:03:31	Not Mature	F3
Achatinella	lila	2010	2010-10-15	2010-10-15	2010	2.54	Keiki		0	2.46	LR Juve 3	2014-10-14	Not Mature	F3
Achatinella	lila	2010	2010-10-25	2010-10-03 05:38:49	2010	3.37	Keiki	0.37	0.0596293	3.1	LR Juve 2	2014-10-02 05:38:49	Not Mature	F3
Achatinella	lila	2010	2010-10-25	2010-10-25	2010	2.89	Keiki		0	2.58	LR Juve 2	2014-10-24	Not Mature	F3
Achatinella	lila	2010	2010-11-01	2010-08-21 05:38:49	2010	4.22	Keiki	1.22	0.196616	3.87	No Juves 2	2014-08-20 05:38:49	Not Mature	F3
Achatinella	lila	2010	2010-11-01	2010-11-01	2010	2.8	Keiki		0	2.81	No Juves 2	2014-10-31	Not Mature	F3
Achatinella	lila	2010	2010-11-02	2007-11-13 02:38:24	2007	13.23	NonKeiki	3.73	2.9723	8.05	Extra snails 1	2011-11-12 02:38:24	Not Mature	F2
Achatinella	lila	2010	2010-11-09	2010-09-05 07:03:31	2010	4.1	Keiki	1.1	0.177276	3.3	HR Juve 1	2014-09-04 07:03:31	Not Mature	F3
Achatinella	lila	2010	2010-11-09	2010-10-28 05:38:49	2010	3.2	Keiki	0.2	0.0322321	2.62	No Juves 1	2014-10-27 05:38:49	Not Mature	F3
Achatinella	lila	2010	2010-11-09	2010-11-09	2010	2.71	Keiki		0	2.26	No Juves 1	2014-11-08	Not Mature	F3
Achatinella	lila	2010	2010-11-11	2007-07-19 15:50:24	2007	13.88	NonKeiki	4.38	3.316	8.61	HR Juve 2	2011-07-18 15:50:24	Not Mature	F2
Achatinella	lila	2010	2010-11-11	2010-11-11	2010	2.83	Keiki		0	2.95	HR Juve 2	2014-11-10	Not Mature	F3
Achatinella	lila	2010	2010-11-11	2010-11-11	2010	2.42	Keiki		0	2.01	HR Juve 2	2014-11-10	Not Mature	F3
Achatinella	lila	2010	2010-11-11	2010-11-11	2010	2.21	Keiki		0	2.81	HR Juve 2	2014-11-10	Not Mature	F3
Achatinella	lila	2010	2010-11-12	2007-01-04 19:12:00	2007	14.9	NonKeiki	5.4	3.85534	8.85	HR Juve 3	2011-01-03 19:12:00	Not Mature	F2
Achatinella	lila	2010	2010-11-12	2010-03-01 02:49:24	2010	7.35	Keiki	4.35	0.701048	5.42	HR Juve 3	2014-02-28 02:49:24	Not Mature	F3
Achatinella	lila	2010	2010-11-12	2010-11-12	2010	2.66	Keiki		0	2.23	HR Juve 3	2014-11-11	Not Mature	F3
Achatinella	lila	2010	2010-11-18	2010-11-18	2010	2.6	Keiki		0	2.42	No Juves 2	2014-11-17	Not Mature	F3
Achatinella	lila	2010	2010-11-22	2007-12-16 14:52:48	2007	13.16	NonKeiki	3.66	2.93529	8.25	Extra snails 1	2011-12-15 14:52:48	Not Mature	F2
Achatinella	lila	2010	2010-11-22	2008-05-09 08:52:48	2008	12.41	NonKeiki	2.91	2.53871	7.87	Extra snails 1	2012-05-08 08:52:48	Not Mature	F2
Achatinella	lila	2010	2010-11-22	2008-12-21 04:19:12	2008	11.24	NonKeiki	1.74	1.92005	7.75	Extra snails 1	2012-12-20 04:19:12	Not Mature	F3
Achatinella	lila	2010	2010-11-22	2010-03-24 15:31:45	2010	7.12	Keiki	4.12	0.663981	5.34	Extra snails1	2014-03-23 15:31:45	Not Mature	F3
Achatinella	lila	2010	2010-11-22	2010-09-06 12:42:21	2010	4.3	Keiki	1.3	0.209508	3.36	Extra snails 1	2014-09-05 12:42:21	Not Mature	F3
Achatinella	lila	2010	2010-11-22	2010-10-06 12:42:21	2010	3.79	Keiki	0.79	0.127317	3.2	Extra snails 1	2014-10-05 12:42:21	Not Mature	F3
Achatinella	lila	2010	2010-11-22	2010-10-25 22:35:17	2010	3.46	Keiki	0.46	0.0741338	2.94	Extra snails 1	2014-10-24 22:35:17	Not Mature	F3
Achatinella	lila	2010	2010-11-22	2010-11-07 07:03:31	2010	3.25	Keiki	0.25	0.0402901	2.86	Extra snails 1	2014-11-06 07:03:31	Not Mature	F3
Achatinella	lila	2010	2010-11-22	2010-11-11 09:52:56	2010	3.18	Keiki	0.18	0.0290089	2.75	LR Juve 3	2014-11-10 09:52:56	Not Mature	F3
Achatinella	lila	2010	2010-12-07	2010-11-13 11:17:38	2010	3.4	Keiki	0.4	0.0644641	3.29	HR Juve 1	2014-11-12 11:17:38	Not Mature	F3
Achatinella	lila	2010	2010-12-07	2010-11-25 05:38:49	2010	3.2	Keiki	0.2	0.0322321	2.2	HR Juve 1	2014-11-24 05:38:49	Not Mature	F3
Achatinella	lila	2010	2010-12-07	2010-11-27 14:07:03	2010	3.16	Keiki	0.16	0.0257857	2.52	LR Juve 1	2014-11-26 14:07:03	Not Mature	F3
Achatinella	lila	2010	2010-12-07	2010-12-07	2010	2.75	Keiki		0	2.29	HR Juve 1	2014-12-06	Not Mature	F3
Achatinella	lila	2010	2010-12-09	2007-11-26 22:48:00	2007	13.35	NonKeiki	3.85	3.03575	8.28	Extra snails1	2011-11-25 22:48:00	Not Mature	F2
Achatinella	lila	2010	2010-12-09	2008-04-15 20:09:36	2008	12.62	NonKeiki	3.12	2.64975	8.48	Extra snails 1	2012-04-14 20:09:36	Not Mature	F2
Achatinella	lila	2010	2010-12-09	2008-04-17 18:28:48	2008	12.61	NonKeiki	3.11	2.64447	8.7	Extra snails 1	2012-04-16 18:28:48	Not Mature	F2
Achatinella	lila	2010	2010-12-09	2008-09-23 00:43:12	2008	11.79	NonKeiki	2.29	2.21088	6.92	Extra snails1	2012-09-22 00:43:12	Not Mature	F3
Achatinella	lila	2010	2010-12-09	2008-11-12 05:02:24	2008	11.53	NonKeiki	2.03	2.0734	8.12	Extra snails1	2012-11-11 05:02:24	Not Mature	F3
Achatinella	lila	2010	2010-12-09	2009-01-12 23:16:48	2009	11.21	NonKeiki	1.71	1.90419	7.61	Extra snails 1	2013-01-11 23:16:48	Not Mature	F3
Achatinella	lila	2010	2010-12-09	2009-03-13 19:12:00	2009	10.9	NonKeiki	1.4	1.74027	7.46	Extra snails1	2013-03-12 19:12:00	Not Mature	F3
Achatinella	lila	2010	2010-12-09	2009-11-30 11:17:38	2009	9.35	Keiki	6.35	1.02337	7.05	Extra snails 1	2013-11-29 11:17:38	Not Mature	F3
Achatinella	lila	2010	2010-12-09	2010-01-14 18:21:10	2010	8.58	Keiki	5.58	0.899275	6.69	Extra snails 1	2014-01-13 18:21:10	Not Mature	F3
Achatinella	lila	2010	2010-12-09	2010-01-19 11:17:38	2010	8.5	Keiki	5.5	0.886382	5.61	Extra snails1	2014-01-18 11:17:38	Not Mature	F3
Achatinella	lila	2010	2010-12-09	2010-03-16 08:28:14	2010	7.55	Keiki	4.55	0.73328	5.31	HR Juve 3	2014-03-15 08:28:14	Not Mature	F3
Achatinella	lila	2010	2010-12-09	2010-05-27 16:56:28	2010	6.32	Keiki	3.32	0.535052	4.91	Extra snails1	2014-05-26 16:56:28	Not Mature	F3
Achatinella	lila	2010	2010-12-09	2010-06-27 07:03:31	2010	5.8	Keiki	2.8	0.451249	4.54	HR Juve 3	2014-06-26 07:03:31	Not Mature	F3
Achatinella	lila	2010	2010-12-09	2010-07-07 07:03:31	2010	5.63	Keiki	2.63	0.423852	4.16	HR Juve 3	2014-07-06 07:03:31	Not Mature	F3
Achatinella	lila	2010	2010-12-09	2010-09-20	2010	4.36	Keiki	1.36	0.219178	3.75	Extra snails1	2014-09-19	Not Mature	F3
Achatinella	lila	2010	2010-12-09	2010-09-28 05:38:49	2010	4.22	Keiki	1.22	0.196616	3.58	Extra snails 1	2014-09-27 05:38:49	Not Mature	F3
Achatinella	lila	2010	2010-12-09	2010-10-18 05:38:49	2010	3.88	Keiki	0.88	0.141821	3.1	Extra snails1	2014-10-17 05:38:49	Not Mature	F3
Achatinella	lila	2010	2010-12-09	2010-12-09	2010	2.74	Keiki		0	2.2	No Juves 3	2014-12-08	Not Mature	F3
Achatinella	lila	2010	2010-12-09	2010-12-09	2010	2.43	Keiki		0	2.2	No Juves 3	2014-12-08	Not Mature	F3
Achatinella	lila	2010	2010-12-28	2010-09-21 22:35:17	2010	4.65	Keiki	1.65	0.265915	3.68	No Juve 1	2014-09-20 22:35:17	Not Mature	F3
Achatinella	lila	2010	2010-12-28	2010-12-28	2010	2.84	Keiki		0	2.83	HR Juve 3	2014-12-27	Not Mature	F3
Achatinella	lila	2010	2010-12-28	2010-12-28	2010	2.42	Keiki		0	2.34	HR Juve 1	2014-12-27	Not Mature	F3
Achatinella	lila	2010	2010-12-28	2010-12-28	2010	2.22	Keiki		0	2.45	HR Juve 3	2014-12-27	Not Mature	F3
Achatinella	lila	2010	2010-12-30	2007-02-23 17:31:12	2007	14.89	NonKeiki	5.39	3.85005	8.8	LR Juve 3	2011-02-22 17:31:12	Not Mature	F2
Achatinella	lila	2010	2010-12-30	2007-03-15 00:43:12	2007	14.79	NonKeiki	5.29	3.79718	9.44	HR Juve 2	2011-03-14 00:43:12	Not Mature	F2
Achatinella	lila	2010	2010-12-30	2007-06-17 14:24:00	2007	14.3	NonKeiki	4.8	3.53808	8.66	LR Juve 3	2011-06-16 14:24:00	Not Mature	F2
Achatinella	lila	2010	2010-12-30	2010-09-18 15:31:45	2010	4.74	Keiki	1.74	0.280419	4.31	No Juve 2	2014-09-17 15:31:45	Not Mature	F3
Achatinella	lila	2010	2010-12-30	2010-11-02 08:28:14	2010	3.98	Keiki	0.98	0.157937	3.5	HR Juve 2	2014-11-01 08:28:14	Not Mature	F3
Achatinella	lila	2010	2010-12-30	2010-11-14 16:56:28	2010	3.77	Keiki	0.77	0.124093	3.7	LR Juve 3	2014-11-13 16:56:28	Not Mature	F3
Achatinella	lila	2010	2010-12-30	2010-11-17 01:24:42	2010	3.73	Keiki	0.73	0.117647	2.91	HR Juve 2	2014-11-16 01:24:42	Not Mature	F3
Achatinella	lila	2010	2010-12-30	2010-12-05 07:03:31	2010	3.42	Keiki	0.42	0.0676873	3.1	LR Juve 3	2014-12-04 07:03:31	Not Mature	F3
Achatinella	lila	2010	2010-12-30	2010-12-18 05:38:49	2010	3.2	Keiki	0.2	0.0322321	2.7	LR Juve 3	2014-12-17 05:38:49	Not Mature	F3
Achatinella	lila	2010	2010-12-30	2010-12-20 14:07:03	2010	3.16	Keiki	0.16	0.0257857	2.65	HR Juve 2	2014-12-19 14:07:03	Not Mature	F3
Achatinella	lila	2010	2010-12-30	2010-12-21 04:14:07	2010	3.15	Keiki	0.15	0.0241741	2.72	LR Juve 3	2014-12-20 04:14:07	Not Mature	F3
Achatinella	lila	2010	2010-12-30	2010-12-29 09:52:56	2010	3.01	Keiki	0.01	0.0016116	2.73	HR Juve 2	2014-12-28 09:52:56	Not Mature	F3
Achatinella	lila	2010	2010-12-30	2010-12-30	2010	2.99	Keiki		0	2.4	HR Juve 2	2014-12-29	Not Mature	F3
Achatinella	lila	2010	2010-12-30	2010-12-30	2010	2.75	Keiki		0	2.27	LR Juve 3	2014-12-29	Not Mature	F3
Achatinella	lila	2010	2010-12-30	2010-12-30	2010	2.7	Keiki		0	3.05	No Juve 2	2014-12-29	Not Mature	F3
Achatinella	lila	2010	2010-12-30	2010-12-30	2010	2.56	Keiki		0	2.35	LR Juve 3	2014-12-29	Not Mature	F3
Achatinella	lila	2010	2010-12-30	2010-12-30	2010	2.1	Keiki		0	2.43	No Juve 2	2014-12-29	Not Mature	F3
Achatinella	lila	2011	2011-01-05	2010-11-03 01:24:42	2010	4.07	Keiki	1.07	0.172442	3.39	Population 3	2014-11-02 01:24:42	Not Mature	F3
Achatinella	lila	2011	2011-01-10	2010-11-29 05:38:49	2010	3.71	Keiki	0.71	0.114424	3	HR Juve 1	2014-11-28 05:38:49	Not Mature	F3
Achatinella	lila	2011	2011-01-10	2011-01-10	2011	2.59	Keiki		0	2.41	HR Juve 2	2015-01-09	Not Mature	F3
Achatinella	lila	2011	2011-01-10	2011-01-10	2011	2.57	Keiki		0	2.14	HR Juve 2	2015-01-09	Not Mature	F3
Achatinella	lila	2011	2011-01-10	2011-01-10	2011	1.95	Keiki		0	1.61	HR Juve 1	2015-01-09	Not Mature	F3
Achatinella	lila	2011	2011-01-11	2007-09-24 10:48:00	2007	13.85	NonKeiki	4.35	3.30014	8.82		2011-09-23 10:48:00	Not Mature	F2
Achatinella	lila	2011	2011-01-11	2007-10-09 21:21:36	2007	13.77	NonKeiki	4.27	3.25784	8.63		2011-10-08 21:21:36	Not Mature	F2
Achatinella	lila	2011	2011-01-11	2008-01-31 18:14:24	2008	13.18	NonKeiki	3.68	2.94586	8.57		2012-01-30 18:14:24	Not Mature	F2
Achatinella	lila	2011	2011-01-11	2008-02-16 04:48:00	2008	13.1	NonKeiki	3.6	2.90356	8.56		2012-02-15 04:48:00	Not Mature	F2
Achatinella	lila	2011	2011-01-11	2008-04-02 12:28:48	2008	12.86	NonKeiki	3.36	2.77666	8.33		2012-04-01 12:28:48	Not Mature	F2
Achatinella	lila	2011	2011-01-11	2008-04-04 10:48:00	2008	12.85	NonKeiki	3.35	2.77137	8.7		2012-04-03 10:48:00	Not Mature	F2
Achatinella	lila	2011	2011-01-11	2008-04-04 10:48:00	2008	12.85	NonKeiki	3.35	2.77137	8.4		2012-04-03 10:48:00	Not Mature	F2
Achatinella	lila	2011	2011-01-11	2008-04-27 14:38:24	2008	12.73	NonKeiki	3.23	2.70792	8.14		2012-04-26 14:38:24	Not Mature	F2
Achatinella	lila	2011	2011-01-11	2008-09-27 01:55:12	2008	11.94	NonKeiki	2.44	2.29019	8		2012-09-26 01:55:12	Not Mature	F3
Achatinella	lila	2011	2011-01-11	2009-03-15 22:04:48	2009	11.06	NonKeiki	1.56	1.82488	7.45		2013-03-14 22:04:48	Not Mature	F3
Achatinella	lila	2011	2011-01-11	2010-03-23 11:17:38	2010	7.99	Keiki	4.99	0.80419	5.89		2014-03-22 11:17:38	Not Mature	F3
Achatinella	lila	2011	2011-01-11	2010-07-11 11:17:38	2010	6.12	Keiki	3.12	0.50282	5		2014-07-10 11:17:38	Not Mature	F3
Achatinella	lila	2011	2011-01-11	2010-10-30 01:24:42	2010	4.24	Keiki	1.24	0.199839	3.9		2014-10-29 01:24:42	Not Mature	F3
Achatinella	lila	2011	2011-01-11	2011-01-01	2011	3.17	Keiki	0.17	0.0273973	2.62	No Juve 2	2014-12-31	Not Mature	F3
Achatinella	lila	2011	2011-01-24	2008-07-28 17:45:36	2008	12.32	NonKeiki	2.82	2.49112	8.04	Population 1	2012-07-27 17:45:36	Not Mature	F2
Achatinella	lila	2011	2011-01-24	2009-02-18 07:40:48	2009	11.26	NonKeiki	1.76	1.93063	7.72	Population 1	2013-02-17 07:40:48	Not Mature	F3
Achatinella	lila	2011	2011-01-24	2011-01-15 04:14:07	2011	3.15	Keiki	0.15	0.0241741	2.6	Population 1	2015-01-14 04:14:07	Not Mature	F3
Achatinella	lila	2011	2011-01-25	2010-11-03 01:24:42	2010	4.41	Keiki	1.41	0.227236	3.23	Supplement	2014-11-02 01:24:42	Not Mature	F3
Achatinella	lila	2011	2011-01-25	2010-12-04 19:45:52	2010	3.87	Keiki	0.87	0.14021	3.03	Control	2014-12-03 19:45:52	Not Mature	F3
Achatinella	lila	2011	2011-01-25	2011-01-25	2011	2.95	Keiki		0	2.26	Control	2015-01-24	Not Mature	F3
Achatinella	lila	2011	2011-01-26	2008-12-30 05:02:24	2008	11.53	NonKeiki	2.03	2.0734	8.07	Population 3	2012-12-29 05:02:24	Not Mature	F3
Achatinella	lila	2011	2011-01-26	2010-08-20 18:21:10	2010	5.69	Keiki	2.69	0.433521	4.47	Population 4	2014-08-19 18:21:10	Not Mature	F3
Achatinella	lila	2011	2011-01-31	2008-04-28 07:26:24	2008	12.83	NonKeiki	3.33	2.76079	8.53	Population 8	2012-04-27 07:26:24	Not Mature	F2
Achatinella	lila	2011	2011-01-31	2008-07-06 18:57:36	2008	12.47	NonKeiki	2.97	2.57044	8.47	Population 8	2012-07-05 18:57:36	Not Mature	F2
Achatinella	lila	2011	2011-01-31	2010-09-26 12:42:21	2010	5.15	Keiki	2.15	0.346495	4	Population 8	2014-09-25 12:42:21	Not Mature	F3
Achatinella	lila	2011	2011-02-07	2008-01-06 15:36:00	2008	13.45	NonKeiki	3.95	3.08863	8.64	Population 7	2012-01-05 15:36:00	Not Mature	F2
Achatinella	lila	2011	2011-02-07	2008-03-18 01:26:24	2008	13.08	NonKeiki	3.58	2.89299	7.9	Population 7	2012-03-17 01:26:24	Not Mature	F2
Achatinella	lila	2011	2011-02-07	2010-12-11 22:35:17	2010	3.97	Keiki	0.97	0.156326	2.96	Population 3	2014-12-10 22:35:17	Not Mature	F3
Achatinella	lila	2011	2011-02-07	2011-01-03 21:10:35	2011	3.58	Keiki	0.58	0.093473	2.65	Population 3	2015-01-02 21:10:35	Not Mature	F3
Achatinella	lila	2011	2011-02-10	2008-10-03 22:04:48	2008	12.06	NonKeiki	2.56	2.35364	7.64	Supplement	2012-10-02 22:04:48	Not Mature	F3
Achatinella	lila	2011	2011-02-10	2010-10-24 18:21:10	2010	4.84	Keiki	1.84	0.296535	3.83	Supplement	2014-10-23 18:21:10	Not Mature	F3
Achatinella	lila	2011	2011-02-10	2010-11-10 05:38:49	2010	4.56	Keiki	1.56	0.25141	3.63	Supplement	2014-11-09 05:38:49	Not Mature	F3
Achatinella	lila	2011	2011-02-10	2010-11-23 04:14:07	2010	4.34	Keiki	1.34	0.215955	3.55	Supplement	2014-11-22 04:14:07	Not Mature	F3
Achatinella	lila	2011	2011-02-23	2007-04-10 01:55:12	2007	14.94	NonKeiki	5.44	3.87649	19.71	Population 8	2011-04-09 01:55:12	Not Mature	F2
Achatinella	lila	2011	2011-02-23	2010-12-23 05:38:49	2010	4.05	Keiki	1.05	0.169218	3.92	Population 8	2014-12-22 05:38:49	Not Mature	F3
Achatinella	lila	2011	2011-02-23	2011-01-02 05:38:49	2011	3.88	Keiki	0.88	0.141821	3.67	Population 8	2015-01-01 05:38:49	Not Mature	F3
Achatinella	lila	2011	2011-02-23	2011-01-18 16:56:28	2011	3.6	Keiki	0.6	0.0966962	3.61	Population 8	2015-01-17 16:56:28	Not Mature	F3
Achatinella	lila	2011	2011-02-24	2008-04-19 12:00:00	2008	13	NonKeiki	3.5	2.85068	8.29	Population 9	2012-04-18 12:00:00	Not Mature	F2
Achatinella	lila	2011	2011-02-24	2008-06-18 07:55:12	2008	12.69	NonKeiki	3.19	2.68677	9.24	Population 5	2012-06-17 07:55:12	Not Mature	F2
Achatinella	lila	2011	2011-02-24	2009-04-15 09:50:24	2009	11.13	NonKeiki	1.63	1.86189	7.4	Population 6	2013-04-14 09:50:24	Not Mature	F3
Achatinella	lila	2011	2011-02-24	2010-12-30 16:56:28	2010	3.94	Keiki	0.94	0.151491	3.6	Population 6	2014-12-29 16:56:28	Not Mature	F3
Achatinella	lila	2011	2011-02-24	2011-02-24	2011	2.83	Keiki		0	3.11	Population 6	2015-02-23	Not Mature	F3
Achatinella	lila	2011	2011-02-24	2011-02-24	2011	2.12	Keiki		0	2.01	Population 4	2015-02-23	Not Mature	F3
Achatinella	lila	2011	2011-03-02	2011-02-09 09:52:56	2011	3.35	Keiki	0.35	0.0564061	3.47	Population 2	2015-02-08 09:52:56	Not Mature	F3
Achatinella	lila	2011	2011-03-02	2011-03-02	2011	2.4	Keiki		0	2.15	Population 2	2015-03-01	Not Mature	F3
Achatinella	lila	2011	2011-03-04	2010-12-11 01:24:42	2010	4.41	Keiki	1.41	0.227236	4.2	Supplement	2014-12-10 01:24:42	Not Mature	F3
Achatinella	lila	2011	2011-03-08	2010-11-12 16:56:28	2010	4.96	Keiki	1.96	0.315874	4.41	Population 4	2014-11-11 16:56:28	Not Mature	F3
Achatinella	lila	2011	2011-03-09	2011-02-08 18:21:10	2011	3.48	Keiki	0.48	0.077357	3.4	Population 9	2015-02-07 18:21:10	Not Mature	F3
Achatinella	lila	2011	2011-03-09	2011-02-10 12:42:21	2011	3.45	Keiki	0.45	0.0725222	3.5	Population 9	2015-02-09 12:42:21	Not Mature	F3
Achatinella	lila	2011	2011-03-15	2009-01-14 09:36:00	2009	11.7	NonKeiki	2.2	2.16329	7.78	Supplement	2013-01-13 09:36:00	Not Mature	F3
Achatinella	lila	2011	2011-03-16	2011-02-20 11:17:38	2011	3.4	Keiki	0.4	0.0644641	3.3	Population 2	2015-02-19 11:17:38	Not Mature	F3
Achatinella	lila	2011	2011-03-16	2011-02-21 01:24:42	2011	3.39	Keiki	0.39	0.0628525	3.17	Population 1	2015-02-20 01:24:42	Not Mature	F3
Achatinella	lila	2011	2011-03-17	2008-04-07 16:33:36	2008	13.17	NonKeiki	3.67	2.94058	8.96	Population 6	2012-04-06 16:33:36	Not Mature	F2
Achatinella	lila	2011	2011-03-17	2010-09-23 07:03:31	2010	5.97	Keiki	2.97	0.478646	5.17	Population 7	2014-09-22 07:03:31	Not Mature	F3
Achatinella	lila	2011	2011-03-17	2011-02-07 22:35:17	2011	3.63	Keiki	0.63	0.101531	3.47	Population 4	2015-02-06 22:35:17	Not Mature	F3
Achatinella	lila	2011	2011-03-17	2011-03-03 11:17:38	2011	3.23	Keiki	0.23	0.0370669	3.04	Population 5	2015-03-02 11:17:38	Not Mature	F3
Achatinella	lila	2011	2011-03-18	2010-12-26 19:45:52	2010	4.38	Keiki	1.38	0.222401	3.8	Population 8	2014-12-25 19:45:52	Not Mature	F3
Achatinella	lila	2011	2011-03-18	2011-03-18	2011	2.64	Keiki		0	2.48	Population 9	2015-03-17	Not Mature	F3
Achatinella	lila	2011	2011-04-01	2009-12-23 13:40:48	2009	10.01	NonKeiki	0.51	1.26967	7.17	Population 6	2013-12-22 13:40:48	Not Mature	F3
Achatinella	lila	2011	2011-04-01	2010-12-27 07:03:31	2010	4.61	Keiki	1.61	0.259468	3.94	Population 2	2014-12-26 07:03:31	Not Mature	F3
Achatinella	lila	2011	2011-04-01	2011-02-17 01:24:42	2011	3.73	Keiki	0.73	0.117647	3.64	Population 4	2015-02-16 01:24:42	Not Mature	F3
Achatinella	lila	2011	2011-04-01	2011-04-01	2011	2.21	Keiki		0	2.34	Population 4	2015-03-31	Not Mature	F3
Achatinella	lila	2011	2011-04-11	2011-02-12 22:35:17	2011	3.97	Keiki	0.97	0.156326	3.21	Population 8	2015-02-11 22:35:17	Not Mature	F3
Achatinella	lila	2011	2011-04-11	2011-03-17 07:03:31	2011	3.42	Keiki	0.42	0.0676873	3.18	Population 8	2015-03-16 07:03:31	Not Mature	F3
Achatinella	lila	2011	2011-04-12	2011-01-12 14:07:03	2011	4.52	Keiki	1.52	0.244964	4.14	Supplement	2015-01-11 14:07:03	Not Mature	F3
Achatinella	lila	2011	2011-04-13	2011-04-13	2011	2.97	Keiki		0	3.05	Population 1	2015-04-12	Not Mature	F3
Achatinella	lila	2011	2011-04-15	2010-05-18 05:38:49	2010	8.64	Keiki	5.64	0.908944	7.1	Population 8	2014-05-17 05:38:49	Not Mature	F3
Achatinella	lila	2011	2011-04-15	2011-04-02 15:31:45	2011	3.21	Keiki	0.21	0.0338437	2.95	Population 8	2015-04-01 15:31:45	Not Mature	F3
Achatinella	lila	2011	2011-04-25	2009-04-02 01:40:48	2009	11.51	NonKeiki	2.01	2.06282	8.83	Control	2013-04-01 01:40:48	Not Mature	F3
Achatinella	lila	2011	2011-04-26	2011-04-26	2011	3	Keiki	0	0	2.91	Population 9	2015-04-25	Not Mature	F3
Achatinella	lila	2011	2011-04-28	2008-01-13 07:26:24	2008	13.83	NonKeiki	4.33	3.28956	8.51	Population 6	2012-01-12 07:26:24	Not Mature	F2
Achatinella	lila	2011	2011-04-29	2011-04-22 12:42:21	2011	3.11	Keiki	0.11	0.0177276	2.56	Population 8	2015-04-21 12:42:21	Not Mature	F3
Achatinella	lila	2011	2011-04-29	2011-04-29	2011	2.82	Keiki		0	2.77	Population 8	2015-04-28	Not Mature	F3
Achatinella	lila	2011	2011-04-29	2011-04-29	2011	2.75	Keiki		0	2.5	Population 7	2015-04-28	Not Mature	F3
Achatinella	lila	2011	2011-05-11	2010-07-09 02:49:24	2010	8.2	Keiki	5.2	0.838034	6.66	Population 8	2014-07-08 02:49:24	Not Mature	F3
Achatinella	lila	2011	2011-05-11	2011-04-17 11:17:38	2011	3.4	Keiki	0.4	0.0644641	3.13	Population 8	2015-04-16 11:17:38	Not Mature	F3
Achatinella	lila	2011	2011-05-16	2008-11-13 21:07:12	2008	12.34	NonKeiki	2.84	2.5017	8.19	Population 5	2012-11-12 21:07:12	Not Mature	F3
Achatinella	lila	2011	2011-05-16	2010-09-13 07:03:31	2010	7.16	Keiki	4.16	0.670427	5.84	Population 5	2014-09-12 07:03:31	Not Mature	F3
Achatinella	lila	2011	2011-05-23	2010-11-25 18:21:10	2010	6.03	Keiki	3.03	0.488316	5.14	Control	2014-11-24 18:21:10	Not Mature	F3
Achatinella	lila	2011	2011-06-04	2011-03-10 16:56:28	2011	4.45	Keiki	1.45	0.233683	4.03	Population 6	2015-03-09 16:56:28	Not Mature	F3
Achatinella	lila	2011	2011-06-04	2011-03-23 01:24:42	2011	4.24	Keiki	1.24	0.199839	4.06	Population 6	2015-03-22 01:24:42	Not Mature	F3
Achatinella	lila	2011	2011-06-08	2010-10-22 18:21:10	2010	6.88	Keiki	3.88	0.625302	5.39	Supplement	2014-10-21 18:21:10	Not Mature	F3
Achatinella	lila	2011	2011-06-08	2010-11-19 09:52:56	2010	6.41	Keiki	3.41	0.549557	4.81	Population 2	2014-11-18 09:52:56	Not Mature	F3
Achatinella	lila	2011	2011-06-08	2011-06-08	2011	2.75	Keiki		0	2.7	Population 2	2015-06-07	Not Mature	F3
Achatinella	lila	2011	2011-06-14	2007-08-20 07:26:24	2007	14.83	NonKeiki	5.33	3.81833	9.86	Population 6	2011-08-19 07:26:24	Not Mature	F2
Achatinella	lila	2011	2011-06-21	2011-04-03 04:14:07	2011	4.34	Keiki	1.34	0.215955	4.07	Control	2015-04-02 04:14:07	Not Mature	F3
Achatinella	lila	2011	2011-06-21	2011-06-09 05:38:49	2011	3.2	Keiki	0.2	0.0322321	3.3	Supplement	2015-06-08 05:38:49	Not Mature	F3
Achatinella	lila	2011	2011-06-25	2011-04-01 21:10:35	2011	4.43	Keiki	1.43	0.230459	4.32	Population 8	2015-03-31 21:10:35	Not Mature	F3
Achatinella	lila	2011	2011-06-25	2011-06-02 15:31:45	2011	3.38	Keiki	0.38	0.0612409	3.35	Population 8	2015-06-01 15:31:45	Not Mature	F3
Achatinella	lila	2011	2011-07-09	2010-10-07 07:03:31	2010	7.67	Keiki	4.67	0.752619	6.16	Population 4	2014-10-06 07:03:31	Not Mature	F3
Achatinella	lila	2011	2011-07-11	2010-12-02 09:52:56	2010	6.75	Keiki	3.75	0.604351	5.65	Population 9	2014-12-01 09:52:56	Not Mature	F3
Achatinella	lila	2011	2011-07-19	2011-04-07 01:24:42	2011	4.75	Keiki	1.75	0.282031	4.12	Population 2	2015-04-06 01:24:42	Not Mature	F3
Achatinella	lila	2011	2011-07-19	2011-07-19	2011	2.94	Keiki		0	2.88	Population 1	2015-07-18	Not Mature	F3
Achatinella	lila	2011	2011-07-19	2011-07-19	2011	2.7	Keiki		0	2.66	Population 1	2015-07-18	Not Mature	F3
Achatinella	lila	2011	2011-07-19	2011-07-19	2011	2.59	Keiki		0	2.85	Population 1	2015-07-18	Not Mature	F3
Achatinella	lila	2011	2011-07-25	2010-10-19 18:21:10	2010	7.73	Keiki	4.73	0.762288	5.9	Population 6	2014-10-18 18:21:10	Not Mature	F3
Achatinella	lila	2011	2011-07-25	2011-07-23 05:38:49	2011	3.03	Keiki	0.03	0.00483481	2.17	Population 6	2015-07-22 05:38:49	Not Mature	F3
Achatinella	lila	2011	2011-07-26	2010-11-23 21:10:35	2010	7.15	Keiki	4.15	0.668815	6.04	Population 9	2014-11-22 21:10:35	Not Mature	F3
Achatinella	lila	2011	2011-07-26	2011-05-31 02:49:24	2011	3.95	Keiki	0.95	0.153102	3.03	Population 9	2015-05-30 02:49:24	Not Mature	F3
Achatinella	lila	2011	2011-07-26	2011-07-10 02:49:24	2011	3.27	Keiki	0.27	0.0435133	2.83	Population 9	2015-07-09 02:49:24	Not Mature	F3
Achatinella	lila	2011	2011-07-26	2011-07-26	2011	2.88	Keiki		0	2.93	Population 9	2015-07-25	Not Mature	F3
Achatinella	lila	2011	2011-08-04	2011-06-27 08:28:14	2011	3.64	Keiki	0.64	0.103143	2.8	Population 7	2015-06-26 08:28:14	Not Mature	F3
Achatinella	lila	2011	2011-08-09	2010-10-02 09:52:56	2010	8.28	Keiki	5.28	0.850927	6.56		2014-10-01 09:52:56	Not Mature	F3
Achatinella	lila	2011	2011-08-09	2011-07-27 15:31:45	2011	3.21	Keiki	0.21	0.0338437	3.01	Population 4	2015-07-26 15:31:45	Not Mature	F3
Achatinella	lila	2011	2011-08-22	2011-07-22 09:52:56	2011	3.52	Keiki	0.52	0.0838034	3.19	Population 8	2015-07-21 09:52:56	Not Mature	F3
Achatinella	lila	2011	2011-08-22	2011-07-29 11:17:38	2011	3.4	Keiki	0.4	0.0644641	3.11	Population 8	2015-07-28 11:17:38	Not Mature	F3
Achatinella	lila	2011	2011-09-03	2011-06-19 16:56:28	2011	4.28	Keiki	1.28	0.206285	4.19	Population 2	2015-06-18 16:56:28	Not Mature	F3
Achatinella	lila	2011	2011-09-06	2011-07-06 19:45:52	2011	4.04	Keiki	1.04	0.167607	3.96	Population 7	2015-07-05 19:45:52	Not Mature	F3
Achatinella	lila	2011	2011-09-06	2011-07-11 12:42:21	2011	3.96	Keiki	0.96	0.154714	3.72	Population 7	2015-07-10 12:42:21	Not Mature	F3
Achatinella	lila	2011	2011-09-06	2011-07-11 12:42:21	2011	3.96	Keiki	0.96	0.154714	3.57	Population 7	2015-07-10 12:42:21	Not Mature	F3
Achatinella	lila	2011	2011-09-06	2011-09-06	2011	2.89	Keiki		0	2.83	Population 4	2015-09-05	Not Mature	F3
Achatinella	lila	2011	2011-09-06	2011-09-06	2011	2.8	Keiki		0	2.8	Population 4	2015-09-05	Not Mature	F3
Achatinella	lila	2011	2011-09-06	2011-09-06	2011	2.63	Keiki		0	2.61	Population 4	2015-09-05	Not Mature	F3
Achatinella	lila	2011	2011-09-06	2011-09-06	2011	2.53	Keiki		0	2.63	Population 5	2015-09-05	Not Mature	F3
Achatinella	lila	2011	2011-09-16	2011-07-20 08:28:14	2011	3.98	Keiki	0.98	0.157937	3.77	Population 6	2015-07-19 08:28:14	Not Mature	F3
Achatinella	lila	2011	2011-09-16	2011-08-02 07:03:31	2011	3.76	Keiki	0.76	0.122482	3.45	Population 6	2015-08-01 07:03:31	Not Mature	F3
Achatinella	lila	2011	2011-09-20	2011-05-17 16:56:28	2011	5.13	Keiki	2.13	0.343272	4.78	Population 9	2015-05-16 16:56:28	Not Mature	F3
Achatinella	lila	2011	2011-09-22	2010-08-14 09:36:00	2010	9.7	NonKeiki	0.2	1.10575	7.88		2014-08-13 09:36:00	Not Mature	F3
Achatinella	lila	2011	2011-10-28	2008-04-12 16:04:48	2008	14.31	NonKeiki	4.81	3.54337	10.63	Population 3	2012-04-11 16:04:48	Not Mature	F2
Achatinella	lila	2011	2011-10-28	2011-07-15 21:10:35	2011	4.77	Keiki	1.77	0.285254	4.1	Population 4	2015-07-14 21:10:35	Not Mature	F3
Achatinella	lila	2011	2011-10-28	2011-10-28	2011	2.18	Keiki		0	2.29	Population 2	2015-10-27	Not Mature	F3
Achatinella	lila	2011	2011-11-08	2011-11-08	2011	2.66	Keiki		0	2.65	Supplement	2015-11-07	Not Mature	F3
Achatinella	lila	2011	2011-11-10	2011-07-21 05:38:49	2011	4.9	Keiki	1.9	0.306205	4.39	Population 5	2015-07-20 05:38:49	Not Mature	F3
Achatinella	lila	2011	2011-11-10	2011-11-04 02:49:24	2011	3.1	Keiki	0.1	0.016116	4.3	Population 3	2015-11-03 02:49:24	Not Mature	F3
Achatinella	lila	2011	2011-11-10	2011-11-10	2011	2.83	Keiki		0	2.64	Population 5	2015-11-09	Not Mature	F3
Achatinella	lila	2011	2011-11-11	2011-09-19 15:31:45	2011	3.89	Keiki	0.89	0.143433	3.53	Population 8	2015-09-18 15:31:45	Not Mature	F3
Achatinella	lila	2011	2011-11-23	2011-11-23	2011	3	Keiki	0	0	2.6	Population 2	2015-11-22	Not Mature	F3
Achatinella	lila	2011	2011-11-28	2009-12-07 21:07:12	2009	11.34	NonKeiki	1.84	1.97293	7.96	Population 7	2013-12-06 21:07:12	Not Mature	F3
Achatinella	lila	2011	2011-11-28	2011-10-24 21:10:35	2011	3.58	Keiki	0.58	0.093473	3.61	Population 6	2015-10-23 21:10:35	Not Mature	F3
Achatinella	lila	2011	2011-11-28	2011-11-18 14:07:03	2011	3.16	Keiki	0.16	0.0257857	3.56	Population 7	2015-11-17 14:07:03	Not Mature	F3
Achatinella	lila	2011	2011-11-28	2011-11-28	2011	2.72	Keiki		0	2.02	Population 9	2015-11-27	Not Mature	F3
Achatinella	lila	2011	2011-12-12	2011-09-27 02:49:24	2011	4.29	Keiki	1.29	0.207897	4.1	Population 7	2015-09-26 02:49:24	Not Mature	F3
Achatinella	lila	2011	2011-12-12	2011-10-27 02:49:24	2011	3.78	Keiki	0.78	0.125705	2.61	Population 1	2015-10-26 02:49:24	Not Mature	F3
Achatinella	lila	2011	2011-12-12	2011-11-15 12:42:21	2011	3.45	Keiki	0.45	0.0725222	3.16	Population 9	2015-11-14 12:42:21	Not Mature	F3
Achatinella	lila	2011	2011-12-12	2011-12-09 01:24:42	2011	3.05	Keiki	0.05	0.00805802	3	Population 4	2015-12-08 01:24:42	Not Mature	F3
Achatinella	lila	2011	2011-12-13	2011-11-24 18:21:10	2011	3.31	Keiki	0.31	0.0499597	3.18	Population 5	2015-11-23 18:21:10	Not Mature	F3
Achatinella	lila	2011	2011-12-22	2011-10-12 09:52:56	2011	4.2	Keiki	1.2	0.193392	4.16	Population 4	2015-10-11 09:52:56	Not Mature	F3
Achatinella	lila	2011	2011-12-22	2011-12-22	2011	2.44	Keiki		0	2.48	Population 4	2015-12-21	Not Mature	F3
Achatinella	lila	2012	2012-01-04	2011-12-29 02:49:24	2011	3.1	Keiki	0.1	0.016116	2.79	Population 1	2015-12-28 02:49:24	Not Mature	F3
Achatinella	lila	2012	2012-01-06	2008-09-24 05:45:36	2008	13.82	NonKeiki	4.32	3.28427	9.63	Population 7	2012-09-23 05:45:36	Not Mature	F3
Achatinella	lila	2012	2012-01-20	2011-12-31 14:07:03	2011	3.33	Keiki	0.33	0.0531829	2.99	Supplement	2015-12-30 14:07:03	Not Mature	F3
Achatinella	lila	2012	2012-01-24	2012-01-14 14:07:03	2012	3.16	Keiki	0.16	0.0257857	2.73	Population 5	2016-01-13 14:07:03	Not Mature	F3
Achatinella	lila	2012	2012-01-25	2011-03-26 07:03:31	2011	8.18	Keiki	5.18	0.834811	5.68	Population 7	2015-03-25 07:03:31	Not Mature	F3
Achatinella	lila	2012	2012-01-25	2011-10-23 11:17:38	2011	4.59	Keiki	1.59	0.256245	4.15	Population 7	2015-10-22 11:17:38	Not Mature	F3
Achatinella	lila	2012	2012-01-25	2011-11-17 04:14:07	2011	4.17	Keiki	1.17	0.188558	3.98	Population 7	2015-11-16 04:14:07	Not Mature	F3
Achatinella	lila	2012	2012-01-29	2011-12-08 05:38:49	2011	3.88	Keiki	0.88	0.141821	3.03	Population 7	2015-12-07 05:38:49	Not Mature	F3
Achatinella	lila	2012	2012-02-03	2011-09-28 22:35:17	2011	5.16	Keiki	2.16	0.348106	4.55	Population 7	2015-09-27 22:35:17	Not Mature	F3
Achatinella	lila	2012	2012-02-03	2011-11-10 21:10:35	2011	4.43	Keiki	1.43	0.230459	4.21	Population 7	2015-11-09 21:10:35	Not Mature	F3
Achatinella	lila	2012	2012-02-03	2011-11-18 12:42:21	2011	4.3	Keiki	1.3	0.209508	4	Population 8	2015-11-17 12:42:21	Not Mature	F3
Achatinella	lila	2012	2012-02-03	2011-12-15	2011	3.85	Keiki	0.85	0.136986	3.61	Population 7	2015-12-14	Not Mature	F3
Achatinella	lila	2012	2012-02-03	2012-01-02 05:38:49	2012	3.54	Keiki	0.54	0.0870266	3.54	Population 7	2016-01-01 05:38:49	Not Mature	F3
Achatinella	lila	2012	2012-02-11	2012-01-16 02:49:24	2012	3.44	Keiki	0.44	0.0709106	2.87	Control 1	2016-01-15 02:49:24	Not Mature	F3
Achatinella	lila	2012	2012-02-19	2011-12-29 19:45:52	2011	3.87	Keiki	0.87	0.14021	3.2	Control 3	2015-12-28 19:45:52	Not Mature	F3
Achatinella	lila	2012	2012-02-19	2012-02-19	2012	2.46	Keiki		0	2.46	Control 2	2016-02-18	Not Mature	F3
Achatinella	lila	2012	2012-02-21	2011-11-01 19:45:52	2011	4.89	Keiki	1.89	0.304593	4.46	Cuttle Bone 1	2015-10-31 19:45:52	Not Mature	F3
Achatinella	lila	2012	2012-02-21	2012-01-11 09:52:56	2012	3.69	Keiki	0.69	0.111201	3.64	Cuttle Bone 3	2016-01-10 09:52:56	Not Mature	F3
Achatinella	lila	2012	2012-02-21	2012-02-18 01:24:42	2012	3.05	Keiki	0.05	0.00805802	2.5	Cuttle Bone 3	2016-02-17 01:24:42	Not Mature	F3
Achatinella	lila	2012	2012-02-22	2012-02-22	2012	2.75	Keiki		0	2.42	Cuttle Bone 3	2016-02-21	Not Mature	F3
Achatinella	lila	2012	2012-02-22	2012-02-22	2012	2.55	Keiki		0	2.86	Cuttle Bone 1	2016-02-21	Not Mature	F3
Achatinella	lila	2012	2012-03-02	2008-05-23 18:00:00	2008	14.75	NonKeiki	5.25	3.77603	9.6	Cuttle Bone 2	2012-05-22 18:00:00	Not Mature	F2
Achatinella	lila	2012	2012-03-02	2008-07-24 12:14:24	2008	14.43	NonKeiki	4.93	3.60682	9.97	Cuttle Bone 3	2012-07-23 12:14:24	Not Mature	F2
Achatinella	lila	2012	2012-03-02	2012-01-10 19:45:52	2012	3.87	Keiki	0.87	0.14021	5.76	Cuttle Bone 2	2016-01-09 19:45:52	Not Mature	F3
Achatinella	lila	2012	2012-03-02	2012-01-14 22:35:17	2012	3.8	Keiki	0.8	0.128928	2.9	Cuttle Bone 3	2016-01-13 22:35:17	Not Mature	F3
Achatinella	lila	2012	2012-03-02	2012-02-06 21:10:35	2012	3.41	Keiki	0.41	0.0660757	3.12	Cuttle Bone 1	2016-02-05 21:10:35	Not Mature	F3
Achatinella	lila	2012	2012-03-02	2012-03-02	2012	2.98	Keiki		0	2.64	Cuttle Bone 2	2016-03-01	Not Mature	F3
Achatinella	lila	2012	2012-03-02	2012-03-02	2012	2.52	Keiki		0	2.7	Population 2	2016-03-01	Not Mature	F3
Achatinella	lila	2012	2012-03-13	2012-03-13	2012	2.32	Keiki		0	3.28	Population 1	2016-03-12	Not Mature	F3
Achatinella	lila	2012	2012-03-14	2012-03-14	2012	1.95	Keiki		0	1.65	Control 1	2016-03-13	Not Mature	F3
Achatinella	lila	2012	2012-03-16	2012-01-11 07:03:31	2012	4.1	Keiki	1.1	0.177276	3.81	Cuttle Bone 3	2016-01-10 07:03:31	Not Mature	F3
Achatinella	lila	2012	2012-03-29	2012-02-24 11:17:38	2012	3.57	Keiki	0.57	0.0918614	3.42	Cuttle Bone 3	2016-02-23 11:17:38	Not Mature	F3
Achatinella	lila	2012	2012-03-29	2012-02-28 14:07:03	2012	3.5	Keiki	0.5	0.0805802	3.4	Cuttle Bone 3	2016-02-27 14:07:03	Not Mature	F3
Achatinella	lila	2012	2012-03-29	2012-03-29	2012	2.5	Keiki		0	2.57	Cuttle Bone 2	2016-03-28	Not Mature	F3
Achatinella	lila	2012	2012-03-29	2012-03-29	2012	2.27	Keiki		0	2.42	Population 1	2016-03-28	Not Mature	F3
Achatinella	lila	2012	2012-04-09	2012-03-06 11:17:38	2012	3.57	Keiki	0.57	0.0918614	3.14	Population 2	2016-03-05 11:17:38	Not Mature	F3
Achatinella	lila	2012	2012-04-11	2012-02-03 08:28:14	2012	4.15	Keiki	1.15	0.185334	3.78	Population 1	2016-02-02 08:28:14	Not Mature	F3
Achatinella	lila	2012	2012-04-11	2012-04-02 04:14:07	2012	3.15	Keiki	0.15	0.0241741	3.02	Population 1	2016-04-01 04:14:07	Not Mature	F3
Achatinella	lila	2012	2012-04-11	2012-04-02 18:21:10	2012	3.14	Keiki	0.14	0.0225624	3.02	Population 1	2016-04-01 18:21:10	Not Mature	F3
Achatinella	lila	2012	2012-04-12	2008-10-25 14:52:48	2008	14.16	NonKeiki	4.66	3.46405	9.61	Control 2	2012-10-24 14:52:48	Not Mature	F3
Achatinella	lila	2012	2012-04-12	2012-03-15 22:35:17	2012	3.46	Keiki	0.46	0.0741338	3.4	Control 1	2016-03-14 22:35:17	Not Mature	F3
Achatinella	lila	2012	2012-04-14	2012-02-06 22:35:17	2012	4.14	Keiki	1.14	0.183723	3.89	Cuttle Bone 2	2016-02-05 22:35:17	Not Mature	F3
Achatinella	lila	2012	2012-04-14	2012-04-14	2012	2.99	Keiki		0	2.85	Cuttle Bone 1	2016-04-13	Not Mature	F3
Achatinella	lila	2012	2012-04-14	2012-04-14	2012	2.84	Keiki		0	2.76	Cuttle Bone 2	2016-04-13	Not Mature	F3
Achatinella	lila	2012	2012-04-20	2008-07-11 18:00:00	2008	14.75	NonKeiki	5.25	3.77603	10.23	Population 1	2012-07-10 18:00:00	Not Mature	F2
Achatinella	lila	2012	2012-04-20	2008-09-30 19:26:24	2008	14.33	NonKeiki	4.83	3.55395	9.76	Population 1	2012-09-29 19:26:24	Not Mature	F3
Achatinella	lila	2012	2012-04-20	2009-01-09 04:04:48	2009	13.81	NonKeiki	4.31	3.27899	9.33	Population 1	2013-01-08 04:04:48	Not Mature	F3
Achatinella	lila	2012	2012-04-20	2009-04-13 17:45:36	2009	13.32	NonKeiki	3.82	3.01989	9.17	Population 1	2013-04-12 17:45:36	Not Mature	F3
Achatinella	lila	2012	2012-04-20	2009-07-19 05:45:36	2009	12.82	NonKeiki	3.32	2.75551	8.85	Population 1	2013-07-18 05:45:36	Not Mature	F3
Achatinella	lila	2012	2012-04-20	2010-01-16 15:50:24	2010	11.88	NonKeiki	2.38	2.25847	7.56	Population 1	2014-01-15 15:50:24	Not Mature	F3
Achatinella	lila	2012	2012-04-20	2010-03-11 16:48:00	2010	11.6	NonKeiki	2.1	2.11041	8.53	Population 1	2014-03-10 16:48:00	Not Mature	F3
Achatinella	lila	2012	2012-04-20	2010-05-22 02:38:24	2010	11.23	NonKeiki	1.73	1.91477	8.02	Population 1	2014-05-21 02:38:24	Not Mature	F3
Achatinella	lila	2012	2012-04-20	2010-06-25 20:24:00	2010	11.05	NonKeiki	1.55	1.81959	8.42	Population 2	2014-06-24 20:24:00	Not Mature	F3
Achatinella	lila	2012	2012-04-20	2010-06-29 17:02:24	2010	11.03	NonKeiki	1.53	1.80901	8.74	Population 1	2014-06-28 17:02:24	Not Mature	F3
Achatinella	lila	2012	2012-04-20	2010-08-28 12:57:36	2010	10.72	NonKeiki	1.22	1.6451	7.07	Population 1	2014-08-27 12:57:36	Not Mature	F3
Achatinella	lila	2012	2012-04-20	2012-03-13 08:28:14	2012	3.64	Keiki	0.64	0.103143	3.57	Population 1	2016-03-12 08:28:14	Not Mature	F3
Achatinella	lila	2012	2012-04-27	2011-03-14 14:38:24	2011	9.73	NonKeiki	0.23	1.12162	6.46	Cuttle Bone 1	2015-03-13 14:38:24	Not Mature	F3
Achatinella	lila	2012	2012-04-27	2011-04-20 06:43:12	2011	9.54	NonKeiki	0.04	1.02115	6.25	Cuttle Bone 3	2015-04-19 06:43:12	Not Mature	F3
Achatinella	lila	2012	2012-04-27	2012-03-06 19:45:52	2012	3.87	Keiki	0.87	0.14021	3.9	Cuttle Bone 2	2016-03-05 19:45:52	Not Mature	F3
Achatinella	lila	2012	2012-04-27	2012-04-08 04:14:07	2012	3.32	Keiki	0.32	0.0515713	3.41	Cuttle Bone 3	2016-04-07 04:14:07	Not Mature	F3
Achatinella	lila	2012	2012-04-27	2012-04-27	2012	2.81	Keiki		0	3.08	Cuttle Bone 1	2016-04-26	Not Mature	F3
Achatinella	lila	2012	2012-05-01	2011-04-24 06:43:12	2011	9.54	NonKeiki	0.04	1.02115	7.56	Pop 8	2015-04-23 06:43:12	Not Mature	F3
Achatinella	lila	2012	2012-05-03	2012-03-21 01:24:42	2012	3.73	Keiki	0.73	0.117647	3.09	Orphans	2016-03-20 01:24:42	Not Mature	F3
Achatinella	lila	2012	2012-05-08	2008-12-17 15:21:36	2008	14.02	NonKeiki	4.52	3.39003	9.54	Population 1	2012-12-16 15:21:36	Not Mature	F3
Achatinella	lila	2012	2012-05-08	2012-04-09 04:14:07	2012	3.49	Keiki	0.49	0.0789686	3.32	Population 1	2016-04-08 04:14:07	Not Mature	F3
Achatinella	lila	2012	2012-05-08	2012-05-08	2012	2.83	Keiki		0	2.98	Control 1	2016-05-07	Not Mature	F3
Achatinella	lila	2012	2012-05-09	2012-03-23 12:42:21	2012	3.79	Keiki	0.79	0.127317	3.85	Population 2	2016-03-22 12:42:21	Not Mature	F3
Achatinella	lila	2012	2012-05-09	2012-05-09	2012	2.91	Keiki		0	2.49	Population 2	2016-05-08	Not Mature	F3
Achatinella	lila	2012	2012-05-10	2011-06-02 15:31:45	2011	8.82	Keiki	5.82	0.937953	7.75	Control 2	2015-06-01 15:31:45	Not Mature	F3
Achatinella	lila	2012	2012-05-10	2011-06-09 16:56:28	2011	8.7	Keiki	5.7	0.918614	6.73	Control 2	2015-06-08 16:56:28	Not Mature	F3
Achatinella	lila	2012	2012-05-11	2012-02-24 12:42:21	2012	4.3	Keiki	1.3	0.209508	3.83	Control 3	2016-02-23 12:42:21	Not Mature	F3
Achatinella	lila	2012	2012-05-11	2012-04-13 22:35:17	2012	3.46	Keiki	0.46	0.0741338	3.12	Control 3	2016-04-12 22:35:17	Not Mature	F3
Achatinella	lila	2012	2012-05-11	2012-04-16 21:10:35	2012	3.41	Keiki	0.41	0.0660757	2.9	Control 3	2016-04-15 21:10:35	Not Mature	F3
Achatinella	lila	2012	2012-05-11	2012-04-23 08:28:14	2012	3.3	Keiki	0.3	0.0483481	2.71	Control 3	2016-04-22 08:28:14	Not Mature	F3
Achatinella	lila	2012	2012-05-14	2011-05-11 18:21:10	2011	9.26	Keiki	6.26	1.00886	7.24	Cuttle Bone 1	2015-05-10 18:21:10	Not Mature	F3
Achatinella	lila	2012	2012-05-14	2012-02-09 21:10:35	2012	4.6	Keiki	1.6	0.257857	4.01	Cuttle Bone 1	2016-02-08 21:10:35	Not Mature	F3
Achatinella	lila	2012	2012-05-14	2012-02-14 14:07:03	2012	4.52	Keiki	1.52	0.244964	3.44	Cuttle Bone 3	2016-02-13 14:07:03	Not Mature	F3
Achatinella	lila	2012	2012-05-14	2012-04-16 08:28:14	2012	3.47	Keiki	0.47	0.0757454	3.44	Cuttle Bone 1	2016-04-15 08:28:14	Not Mature	F3
Achatinella	lila	2012	2012-05-14	2012-04-19 07:03:31	2012	3.42	Keiki	0.42	0.0676873	3.27	Cuttle Bone 1	2016-04-18 07:03:31	Not Mature	F3
Achatinella	lila	2012	2012-05-14	2012-05-12 19:45:52	2012	3.02	Keiki	0.02	0.00322321	2.94	Cuttle Bone 1	2016-05-11 19:45:52	Not Mature	F3
Achatinella	lila	2012	2012-05-14	2012-05-14	2012	2.88	Keiki		0	2.57	Cuttle Bone 3	2016-05-13	Not Mature	F3
Achatinella	lila	2012	2012-05-14	2012-05-14	2012	2.59	Keiki		0	1.92	Cuttle Bone 3	2016-05-13	Not Mature	F3
Achatinella	lila	2012	2012-05-14	2012-05-14	2012	2.07	Keiki		0	1.97	Cuttle Bone 2	2016-05-13	Not Mature	F3
Achatinella	lila	2012	2012-05-22	2012-03-07 16:56:28	2012	4.28	Keiki	1.28	0.206285	4.13	Population 1	2016-03-06 16:56:28	Not Mature	F3
Achatinella	lila	2012	2012-05-22	2012-04-30 05:38:49	2012	3.37	Keiki	0.37	0.0596293	2.88	Population 1	2016-04-29 05:38:49	Not Mature	F3
Achatinella	lila	2012	2012-05-22	2012-05-08 11:17:38	2012	3.23	Keiki	0.23	0.0370669	2.55	Control 2	2016-05-07 11:17:38	Not Mature	F3
Achatinella	lila	2012	2012-05-23	2011-08-18 04:14:07	2011	7.74	Keiki	4.74	0.7639	5.51	Control 1	2015-08-17 04:14:07	Not Mature	F3
Achatinella	lila	2012	2012-05-23	2012-05-23	2012	2.75	Keiki		0	2.4	Population 2	2016-05-22	Not Mature	F3
Achatinella	lila	2012	2012-05-24	2012-05-14	2012	3.17	Keiki	0.17	0.0273973	3.1	Cuttle Bone 3	2016-05-13	Not Mature	F3
Achatinella	lila	2012	2012-05-25	2009-04-10 03:21:36	2009	13.52	NonKeiki	4.02	3.12564	8.94	Cuttle Bone 1	2013-04-09 03:21:36	Not Mature	F3
Achatinella	lila	2012	2012-06-05	2012-05-27 18:21:10	2012	3.14	Keiki	0.14	0.0225624	3.09	Population 2	2016-05-26 18:21:10	Not Mature	F3
Achatinella	lila	2012	2012-06-05	2012-05-28 22:35:17	2012	3.12	Keiki	0.12	0.0193392	2.97	Population 2	2016-05-27 22:35:17	Not Mature	F3
Achatinella	lila	2012	2012-06-05	2012-06-05	2012	2.82	Keiki		0	2.89	Population 2	2016-06-04	Not Mature	F3
Achatinella	lila	2012	2012-06-05	2012-06-05	2012	2.77	Keiki		0	2.75	Population 2	2016-06-04	Not Mature	F3
Achatinella	lila	2012	2012-06-06	2010-02-28 19:12:00	2010	11.9	NonKeiki	2.4	2.26904	8.54	Control 2	2014-02-27 19:12:00	Not Mature	F3
Achatinella	lila	2012	2012-06-06	2010-06-24 14:24:00	2010	11.3	NonKeiki	1.8	1.95178	8.89	Control 2	2014-06-23 14:24:00	Not Mature	F3
Achatinella	lila	2012	2012-06-06	2011-09-07 15:31:45	2011	7.63	Keiki	4.63	0.746172	6.11	Control 2	2015-09-06 15:31:45	Not Mature	F3
Achatinella	lila	2012	2012-06-06	2011-12-03 02:49:24	2011	6.16	Keiki	3.16	0.509267	4.9	Control 2	2015-12-02 02:49:24	Not Mature	F3
Achatinella	lila	2012	2012-06-06	2012-03-15 15:31:45	2012	4.4	Keiki	1.4	0.225624	4	Control 2	2016-03-14 15:31:45	Not Mature	F3
Achatinella	lila	2012	2012-06-06	2012-06-06	2012	2.19	Keiki		0	2.23	Control 2	2016-06-05	Not Mature	F3
Achatinella	lila	2012	2012-06-07	2012-06-07	2012	2.1	Keiki		0	1.64	Control 3	2016-06-06	Not Mature	F3
Achatinella	lila	2012	2012-06-07	2012-06-07	2012	1.97	Keiki		0	1.86	Control 3	2016-06-06	Not Mature	F3
Achatinella	lila	2012	2012-06-08	2012-03-11 18:21:10	2012	4.5	Keiki	1.5	0.241741	4.21	Cuttle Bone 1	2016-03-10 18:21:10	Not Mature	F3
Achatinella	lila	2012	2012-06-20	2010-09-02 13:40:48	2010	11.01	NonKeiki	1.51	1.79844	7.57	Population 2	2014-09-01 13:40:48	Not Mature	F3
Achatinella	lila	2012	2012-06-20	2011-09-10 11:17:38	2011	7.82	Keiki	4.82	0.776793	6.91	Control 2	2015-09-09 11:17:38	Not Mature	F3
Achatinella	lila	2012	2012-06-20	2012-02-26 07:03:31	2012	4.95	Keiki	1.95	0.314263	3.77	Cuttle Bone 2	2016-02-25 07:03:31	Not Mature	F3
Achatinella	lila	2012	2012-06-20	2012-03-05 12:42:21	2012	4.81	Keiki	1.81	0.2917	4.58	Control 2	2016-03-04 12:42:21	Not Mature	F3
Achatinella	lila	2012	2012-06-20	2012-04-08 01:24:42	2012	4.24	Keiki	1.24	0.199839	3.89	Population 2	2016-04-07 01:24:42	Not Mature	F3
Achatinella	lila	2012	2012-06-20	2012-05-20 09:52:56	2012	3.52	Keiki	0.52	0.0838034	3.57	Population 2	2016-05-19 09:52:56	Not Mature	F3
Achatinella	lila	2012	2012-06-20	2012-06-07 15:31:45	2012	3.21	Keiki	0.21	0.0338437	2.82	Population 1	2016-06-06 15:31:45	Not Mature	F3
Achatinella	lila	2012	2012-06-20	2012-06-20	2012	2.63	Keiki		0	2.37	Cuttle Bone 3	2016-06-19	Not Mature	F3
Achatinella	lila	2012	2012-06-20	2012-06-20	2012	1.9	Keiki		0	1.96	Control 1	2016-06-19	Not Mature	F3
Achatinella	lila	2012	2012-06-20	2012-06-20	2012	1.19	Keiki		0	1.15	Control 1	2016-06-19	Not Mature	F3
Achatinella	lila	2012	2012-06-21	2011-07-30 12:42:21	2011	8.55	Keiki	5.55	0.89444	6.01	Cuttle Bone 1	2015-07-29 12:42:21	Not Mature	F3
Achatinella	lila	2012	2012-06-21	2011-08-28 22:35:17	2011	8.05	Keiki	5.05	0.81386	6.46	Cuttle Bone 1	2015-08-27 22:35:17	Not Mature	F3
Achatinella	lila	2012	2012-06-21	2011-10-08 12:42:21	2011	7.36	Keiki	4.36	0.702659	6.1	Cuttle Bone 1	2015-10-07 12:42:21	Not Mature	F3
Achatinella	lila	2012	2012-06-25	2012-02-28 22:35:17	2012	4.99	Keiki	1.99	0.320709	4.47	Population 1	2016-02-27 22:35:17	Not Mature	F3
Achatinella	lila	2012	2012-07-05	2009-11-26 06:43:12	2009	12.54	NonKeiki	3.04	2.60745	8.92	Control 2	2013-11-25 06:43:12	Not Mature	F3
Achatinella	lila	2012	2012-07-05	2011-01-01 17:16:48	2011	10.46	NonKeiki	0.96	1.50762	8.12	Control 2	2014-12-31 17:16:48	Not Mature	F3
Achatinella	lila	2012	2012-07-09	2012-07-03 02:49:24	2012	3.1	Keiki	0.1	0.016116	2.9	CaCO3 2	2016-07-02 02:49:24	Not Mature	F3
Achatinella	lila	2012	2012-07-13	2009-03-12 22:33:36	2009	13.92	NonKeiki	4.42	3.33715	9.48	Population 2	2013-03-11 22:33:36	Not Mature	F3
Achatinella	lila	2012	2012-07-13	2009-04-01 05:45:36	2009	13.82	NonKeiki	4.32	3.28427	9.8	Control	2013-03-31 05:45:36	Not Mature	F3
Achatinella	lila	2012	2012-07-13	2009-05-25 06:43:12	2009	13.54	NonKeiki	4.04	3.13622	8.34	CaCO3 1	2013-05-24 06:43:12	Not Mature	F3
Achatinella	lila	2012	2012-07-13	2009-08-22 01:26:24	2009	13.08	NonKeiki	3.58	2.89299	9.32	Population 2	2013-08-21 01:26:24	Not Mature	F3
Achatinella	lila	2012	2012-07-13	2010-08-16 00:57:36	2010	11.22	NonKeiki	1.72	1.90948	8.24	Population 2	2014-08-15 00:57:36	Not Mature	F3
Achatinella	lila	2012	2012-07-13	2010-09-27 12:00:00	2010	11	NonKeiki	1.5	1.79315	8.62	Population 1	2014-09-26 12:00:00	Not Mature	F3
Achatinella	lila	2012	2012-07-13	2011-08-20 08:28:14	2011	8.57	Keiki	5.57	0.897663	6.85	Control 2	2015-08-19 08:28:14	Not Mature	F3
Achatinella	lila	2012	2012-07-13	2011-12-18 08:28:14	2011	6.53	Keiki	3.53	0.568896	5.38	Population 1	2015-12-17 08:28:14	Not Mature	F3
Achatinella	lila	2012	2012-07-13	2012-01-26 18:21:10	2012	5.86	Keiki	2.86	0.460919	3.86	Population 1	2016-01-25 18:21:10	Not Mature	F3
Achatinella	lila	2012	2012-07-13	2012-06-14 18:21:10	2012	3.48	Keiki	0.48	0.077357	3.78	Population 1	2016-06-13 18:21:10	Not Mature	F3
Achatinella	lila	2012	2012-07-13	2012-07-13	2012	2.88	Keiki		0	3.06	Control 2	2016-07-12	Not Mature	F3
Achatinella	lila	2012	2012-07-13	2012-07-13	2012	2.27	Keiki		0	2.18	Control 2	2016-07-12	Not Mature	F3
Achatinella	lila	2012	2012-07-13	2012-07-13	2012	1.79	Keiki		0	2.08	Control 2	2016-07-12	Not Mature	F3
Achatinella	lila	2012	2012-07-20	2009-01-13 07:40:48	2009	14.26	NonKeiki	4.76	3.51693	4.07	Cuttle Bone 2	2013-01-12 07:40:48	Not Mature	F3
Achatinella	lila	2012	2012-07-20	2010-07-17 08:52:48	2010	11.41	NonKeiki	1.91	2.00995	7.16	Control 2	2014-07-16 08:52:48	Not Mature	F3
Achatinella	lila	2012	2012-07-20	2012-06-02 22:35:17	2012	3.8	Keiki	0.8	0.128928	3.34	Cuttle Bone 1	2016-06-01 22:35:17	Not Mature	F3
Achatinella	lila	2012	2012-07-20	2012-07-14 02:49:24	2012	3.1	Keiki	0.1	0.016116	3.03	Cuttle Bone 3	2016-07-13 02:49:24	Not Mature	F3
Achatinella	lila	2012	2012-07-27	2011-03-05 06:00:00	2011	10.25	NonKeiki	0.75	1.39658	7.92	Control 2	2015-03-04 06:00:00	Not Mature	F3
Achatinella	lila	2012	2012-07-27	2012-03-09	2012	5.38	Keiki	2.38	0.383562	4.77	Population 1	2016-03-08	Not Mature	F3
Achatinella	lila	2012	2012-07-27	2012-04-22 16:56:28	2012	4.62	Keiki	1.62	0.26108	3.93	Population 1	2016-04-21 16:56:28	Not Mature	F3
Achatinella	lila	2012	2012-07-27	2012-07-27	2012	2.51	Keiki		0	2.23	Control 3	2016-07-26	Not Mature	F3
Achatinella	lila	2012	2012-07-28	2012-06-30 22:35:17	2012	3.46	Keiki	0.46	0.0741338	3.21	Cuttle Bone 2	2016-06-29 22:35:17	Not Mature	F3
Achatinella	lila	2012	2012-07-28	2012-07-28	2012	2.91	Keiki		0	2.64	Cuttle Bone 1	2016-07-27	Not Mature	F3
Achatinella	lila	2012	2012-08-01	2008-10-15 00:43:12	2008	14.79	NonKeiki	5.29	3.79718	9.4	Pop 8	2012-10-14 00:43:12	Not Mature	F3
Achatinella	lila	2012	2012-08-07	2009-11-03 07:26:24	2009	12.83	NonKeiki	3.33	2.76079	7.48	Population 2	2013-11-02 07:26:24	Not Mature	F3
Achatinella	lila	2012	2012-08-07	2011-11-02 18:21:10	2011	7.73	Keiki	4.73	0.762288	6.26	Population 1	2015-11-01 18:21:10	Not Mature	F3
Achatinella	lila	2012	2012-08-07	2012-01-15 07:03:31	2012	6.48	Keiki	3.48	0.560838	5.82	Population 2	2016-01-14 07:03:31	Not Mature	F3
Achatinella	lila	2012	2012-08-07	2012-03-27 01:24:42	2012	5.26	Keiki	2.26	0.364222	4.62	Population 2	2016-03-26 01:24:42	Not Mature	F3
Achatinella	lila	2012	2012-08-07	2012-06-20 22:35:17	2012	3.8	Keiki	0.8	0.128928	3.49	Population 2	2016-06-19 22:35:17	Not Mature	F3
Achatinella	lila	2012	2012-08-07	2012-08-07	2012	2.19	Keiki		0	1.97	Population 2	2016-08-06	Not Mature	F3
Achatinella	lila	2012	2012-08-07	2012-08-07	2012	2.03	Keiki		0	2.16	Population 2	2016-08-06	Not Mature	F3
Achatinella	lila	2012	2012-08-07	2012-08-07	2012	2.01	Keiki		0	2.14	Population 2	2016-08-06	Not Mature	F3
Achatinella	lila	2012	2012-08-09	2008-09-24 01:55:12	2008	14.94	NonKeiki	5.44	3.87649	9.39	Control 2	2012-09-23 01:55:12	Not Mature	F3
Achatinella	lila	2012	2012-08-09	2010-10-03 06:28:48	2010	11.11	NonKeiki	1.61	1.85132	7.41	Control 2	2014-10-02 06:28:48	Not Mature	F3
Achatinella	lila	2012	2012-08-09	2012-08-09	2012	2.72	Keiki		0	2.62	Control 2	2016-08-08	Not Mature	F3
Achatinella	lila	2012	2012-08-09	2012-08-09	2012	1.74	Keiki		0	1.29	Cuttle Bone 1	2016-08-08	Not Mature	F3
Achatinella	lila	2012	2012-08-10	2009-01-26 14:24:00	2009	14.3	NonKeiki	4.8	3.53808	9.2	Cuttle Bone 1	2013-01-25 14:24:00	Not Mature	F3
Achatinella	lila	2012	2012-08-10	2011-02-12 12:14:24	2011	10.43	NonKeiki	0.93	1.49175	6.87	Cuttle Bone 1	2015-02-11 12:14:24	Not Mature	F3
Achatinella	lila	2012	2012-08-10	2012-08-05 21:10:35	2012	3.07	Keiki	0.07	0.0112812	2.93	Control 1	2016-08-04 21:10:35	Not Mature	F3
Achatinella	lila	2012	2012-08-16	2012-03-24 07:03:31	2012	5.46	Keiki	2.46	0.396454	4.77	Population 2	2016-03-23 07:03:31	Not Mature	F3
Achatinella	lila	2012	2012-08-16	2012-08-02 11:17:38	2012	3.23	Keiki	0.23	0.0370669	2.7	Population 2	2016-08-01 11:17:38	Not Mature	F3
Achatinella	lila	2012	2012-08-17	2011-04-12 14:52:48	2011	10.16	NonKeiki	0.66	1.34899	6.65	Control 3	2015-04-11 14:52:48	Not Mature	F3
Achatinella	lila	2012	2012-08-17	2012-08-17	2012	2.7	Keiki		0	1.47	Control 1	2016-08-16	Not Mature	F3
Achatinella	lila	2012	2012-08-17	2012-08-17	2012	2.63	Keiki		0	1.9	Control 1	2016-08-16	Not Mature	F3
Achatinella	lila	2012	2012-08-19	2012-08-19	2012	2.68	Keiki		0	2.1	Cuttle Bone 3	2016-08-18	Not Mature	F3
Achatinella	lila	2012	2012-08-20	2009-05-15 00:43:12	2009	13.79	NonKeiki	4.29	3.26841	8.67	Population 1	2013-05-14 00:43:12	Not Mature	F3
Achatinella	lila	2012	2012-08-27	2011-02-17 22:19:12	2011	10.49	NonKeiki	0.99	1.52348	8.16	Control 3	2015-02-16 22:19:12	Not Mature	F3
Achatinella	lila	2012	2012-08-27	2012-03-23 12:42:21	2012	5.66	Keiki	2.66	0.428687	5.22	Cuttle Bone 1	2016-03-22 12:42:21	Not Mature	F3
Achatinella	lila	2012	2012-08-27	2012-04-10 18:21:10	2012	5.35	Keiki	2.35	0.378727	4.85	Cuttle Bone 1	2016-04-09 18:21:10	Not Mature	F3
Achatinella	lila	2012	2012-08-27	2012-05-10 04:14:07	2012	4.85	Keiki	1.85	0.298147	4.31	Cuttle Bone 1	2016-05-09 04:14:07	Not Mature	F3
Achatinella	lila	2012	2012-08-27	2012-07-15 01:24:42	2012	3.73	Keiki	0.73	0.117647	3.61	Cuttle Bone 1	2016-07-14 01:24:42	Not Mature	F3
Achatinella	lila	2012	2012-08-27	2012-07-18	2012	3.68	Keiki	0.68	0.109589	3.08	Control 3	2016-07-17	Not Mature	F3
Achatinella	lila	2012	2012-08-27	2012-07-28	2012	3.51	Keiki	0.51	0.0821918	3.38	Control 3	2016-07-27	Not Mature	F3
Achatinella	lila	2012	2012-08-27	2012-08-11 16:56:28	2012	3.26	Keiki	0.26	0.0419017	2.92	Cuttle Bone 1	2016-08-10 16:56:28	Not Mature	F3
Achatinella	lila	2012	2012-08-27	2012-08-27	2012	2.5	Keiki		0	2.16	Control 3	2016-08-26	Not Mature	F3
Achatinella	lila	2012	2012-09-01	2012-07-05 22:35:17	2012	3.97	Keiki	0.97	0.156326	3.56	Control 2	2016-07-04 22:35:17	Not Mature	F3
Achatinella	lila	2012	2012-09-02	2012-08-08 07:03:31	2012	3.42	Keiki	0.42	0.0676873	3.03	Population 1	2016-08-07 07:03:31	Not Mature	F3
Achatinella	lila	2012	2012-09-02	2012-08-24 18:21:10	2012	3.14	Keiki	0.14	0.0225624	3	Population 2	2016-08-23 18:21:10	Not Mature	F3
Achatinella	lila	2012	2012-09-03	2011-02-01 18:28:48	2011	10.61	NonKeiki	1.11	1.58693	7.2	Cuttle Bone 1	2015-01-31 18:28:48	Not Mature	F3
Achatinella	lila	2012	2012-09-03	2012-07-22 15:31:45	2012	3.72	Keiki	0.72	0.116035	2.83	Cuttle Bone 1	2016-07-21 15:31:45	Not Mature	F3
Achatinella	lila	2012	2012-09-03	2012-08-16 08:28:14	2012	3.3	Keiki	0.3	0.0483481	2.47	Control 3	2016-08-15 08:28:14	Not Mature	F3
Achatinella	lila	2012	2012-09-03	2012-08-27 12:42:21	2012	3.11	Keiki	0.11	0.0177276	2.69	Control 3	2016-08-26 12:42:21	Not Mature	F3
Achatinella	lila	2012	2012-09-14	2010-05-30 03:36:00	2010	11.95	NonKeiki	2.45	2.29548	8.79	Population 1	2014-05-29 03:36:00	Not Mature	F3
Achatinella	lila	2012	2012-09-14	2011-11-30 18:21:10	2011	7.9	Keiki	4.9	0.789686	6.38	Population 1	2015-11-29 18:21:10	Not Mature	F3
Achatinella	lila	2012	2012-09-14	2012-08-28 12:42:21	2012	3.28	Keiki	0.28	0.0451249	2.51	Population 1	2016-08-27 12:42:21	Not Mature	F3
Achatinella	lila	2012	2012-09-16	2009-07-04 04:33:36	2009	13.67	NonKeiki	4.17	3.20496	8.89	Cuttle Bone 1	2013-07-03 04:33:36	Not Mature	F3
Achatinella	lila	2012	2012-09-16	2011-08-13 06:14:24	2011	9.68	NonKeiki	0.18	1.09518	6.66	Cuttle Bone 1	2015-08-12 06:14:24	Not Mature	F3
Achatinella	lila	2012	2012-09-16	2012-04-18 09:52:56	2012	5.56	Keiki	2.56	0.412571	4.7	Cuttle Bone 1	2016-04-17 09:52:56	Not Mature	F3
Achatinella	lila	2012	2012-09-19	2012-09-19	2012	2.63	Keiki		0	2.11	Cage 1	2016-09-18	Not Mature	F3
Achatinella	lila	2012	2012-09-20	2008-12-27 04:33:36	2008	14.67	NonKeiki	5.17	3.73373	9.3	Cuttle Bone 1	2012-12-26 04:33:36	Not Mature	F3
Achatinella	lila	2012	2012-09-20	2010-07-06 00:43:12	2010	11.79	NonKeiki	2.29	2.21088	8.66	Cuttle Bone 1	2014-07-05 00:43:12	Not Mature	F3
Achatinella	lila	2012	2012-09-21	2012-07-27 02:49:24	2012	3.95	Keiki	0.95	0.153102	3.59	Population 1	2016-07-26 02:49:24	Not Mature	F3
Achatinella	lila	2012	2012-09-25	2011-01-29 16:19:12	2011	10.74	NonKeiki	1.24	1.65567	8.34	Control 3	2015-01-28 16:19:12	Not Mature	F3
Achatinella	lila	2012	2012-09-25	2011-08-12 14:38:24	2011	9.73	NonKeiki	0.23	1.12162	6	Control 3	2015-08-11 14:38:24	Not Mature	F3
Achatinella	lila	2012	2012-09-25	2011-09-08 15:07:12	2011	9.59	NonKeiki	0.09	1.04759	7.87	Control 3	2015-09-07 15:07:12	Not Mature	F3
Achatinella	lila	2012	2012-09-25	2011-11-10 14:07:03	2011	8.43	Keiki	5.43	0.875101	7.3	Control 2	2015-11-09 14:07:03	Not Mature	F3
Achatinella	lila	2012	2012-09-25	2012-04-20 08:28:14	2012	5.68	Keiki	2.68	0.43191	5.17	Control 3	2016-04-19 08:28:14	Not Mature	F3
Achatinella	lila	2012	2012-09-25	2012-05-10 22:35:17	2012	5.33	Keiki	2.33	0.375504	5.03	Control 3	2016-05-09 22:35:17	Not Mature	F3
Achatinella	lila	2012	2012-09-26	2009-03-22 07:40:48	2009	14.26	NonKeiki	4.76	3.51693	9.12	Control 2	2013-03-21 07:40:48	Not Mature	F3
Achatinella	lila	2012	2012-09-26	2010-08-15 18:28:48	2010	11.61	NonKeiki	2.11	2.1157	8.23	Cuttle Bone 1	2014-08-14 18:28:48	Not Mature	F3
Achatinella	lila	2012	2012-09-26	2011-01-03 15:50:24	2011	10.88	NonKeiki	1.38	1.7297	7.53	Cuttle Bone 1	2015-01-02 15:50:24	Not Mature	F3
Achatinella	lila	2012	2012-09-26	2011-12-17 11:17:38	2011	7.82	Keiki	4.82	0.776793	6.69	Cuttle Bone 1	2015-12-16 11:17:38	Not Mature	F3
Achatinella	lila	2012	2012-09-26	2012-02-02 12:42:21	2012	7.02	Keiki	4.02	0.647865	5.19	Cuttle Bone 1	2016-02-01 12:42:21	Not Mature	F3
Achatinella	lila	2012	2012-09-26	2012-02-13 16:56:28	2012	6.83	Keiki	3.83	0.617244	5.1	Cuttle Bone 1	2016-02-12 16:56:28	Not Mature	F3
Achatinella	lila	2012	2012-09-26	2012-02-14 21:10:35	2012	6.81	Keiki	3.81	0.614021	5.21	Cuttle Bone 1	2016-02-13 21:10:35	Not Mature	F3
Achatinella	lila	2012	2012-09-26	2012-09-26	2012	2.24	Keiki		0	1.83	Cuttle Bone 1	2016-09-25	Not Mature	F3
Achatinella	lila	2012	2012-09-28	2009-11-22 12:00:00	2009	13	NonKeiki	3.5	2.85068	8.02	CaCO3 2	2013-11-21 12:00:00	Not Mature	F3
Achatinella	lila	2012	2012-09-28	2011-07-09 22:33:36	2011	9.92	NonKeiki	0.42	1.22208	7.41	CaCO3 2	2015-07-08 22:33:36	Not Mature	F3
Achatinella	lila	2012	2012-09-28	2011-10-09 21:10:35	2011	9.02	Keiki	6.02	0.970185	7.3	CaCO3 2	2015-10-08 21:10:35	Not Mature	F3
Achatinella	lila	2012	2012-09-28	2011-10-22 19:45:52	2011	8.8	Keiki	5.8	0.93473	7.3	CaCO3 2	2015-10-21 19:45:52	Not Mature	F3
Achatinella	lila	2012	2012-09-28	2011-11-13 14:07:03	2011	8.43	Keiki	5.43	0.875101	7.39	CaCO3 2	2015-11-12 14:07:03	Not Mature	F3
Achatinella	lila	2012	2012-09-28	2011-12-05 08:28:14	2011	8.06	Keiki	5.06	0.815471	6.68	CaCO3 2	2015-12-04 08:28:14	Not Mature	F3
Achatinella	lila	2012	2012-09-28	2012-01-14 22:35:17	2012	7.37	Keiki	4.37	0.704271	6.48	CaCO3 2	2016-01-13 22:35:17	Not Mature	F3
Achatinella	lila	2012	2012-10-05	2011-04-21 02:09:36	2011	10.37	NonKeiki	0.87	1.46003	7.23	Population 2	2015-04-20 02:09:36	Not Mature	F3
Achatinella	lila	2012	2012-10-05	2012-09-29 02:49:24	2012	3.1	Keiki	0.1	0.016116	3.43	Population 1	2016-09-28 02:49:24	Not Mature	F3
Achatinella	lila	2012	2012-10-09	2009-02-13 03:21:36	2009	14.52	NonKeiki	5.02	3.65441	9.15	Control 3	2013-02-12 03:21:36	Not Mature	F3
Achatinella	lila	2012	2012-10-09	2011-01-10 20:52:48	2011	10.91	NonKeiki	1.41	1.74556	7.12	Control 3	2015-01-09 20:52:48	Not Mature	F3
Achatinella	lila	2012	2012-10-09	2011-01-26 07:26:24	2011	10.83	NonKeiki	1.33	1.70326	8.02	Control 3	2015-01-25 07:26:24	Not Mature	F3
Achatinella	lila	2012	2012-10-09	2012-02-19 15:31:45	2012	6.95	Keiki	3.95	0.636583	5.48	Control 3	2016-02-18 15:31:45	Not Mature	F3
Achatinella	lila	2012	2012-10-09	2012-04-02	2012	6.23	Keiki	3.23	0.520548	5.27	Control 3	2016-04-01	Not Mature	F3
Achatinella	lila	2012	2012-10-09	2012-04-03 18:21:10	2012	6.2	Keiki	3.2	0.515713	4.77	Control 3	2016-04-02 18:21:10	Not Mature	F3
Achatinella	lila	2012	2012-10-09	2012-05-31 09:52:56	2012	5.22	Keiki	2.22	0.357776	5.23	Control 2	2016-05-30 09:52:56	Not Mature	F3
Achatinella	lila	2012	2012-10-09	2012-08-21 18:21:10	2012	3.82	Keiki	0.82	0.132151	3.76	Control 2	2016-08-20 18:21:10	Not Mature	F3
Achatinella	lila	2012	2012-10-09	2012-08-27 01:24:42	2012	3.73	Keiki	0.73	0.117647	3.66	Control 2	2016-08-26 01:24:42	Not Mature	F3
Achatinella	lila	2012	2012-10-09	2012-09-19	2012	3.34	Keiki	0.34	0.0547945	2.44	Cuttlebone 1	2016-09-18	Not Mature	F3
Achatinella	lila	2012	2012-10-09	2012-10-07 19:45:52	2012	3.02	Keiki	0.02	0.00322321	2.93	Control 3	2016-10-06 19:45:52	Not Mature	F3
Achatinella	lila	2012	2012-10-10	2009-06-23 10:48:00	2009	13.85	NonKeiki	4.35	3.30014	9.27	Cuttle Bone 2	2013-06-22 10:48:00	Not Mature	F3
Achatinella	lila	2012	2012-10-10	2010-08-22 01:12:00	2010	11.65	NonKeiki	2.15	2.13685	7.59	Cuttle Bone 2	2014-08-21 01:12:00	Not Mature	F3
Achatinella	lila	2012	2012-10-10	2011-11-05 14:07:03	2011	8.77	Keiki	5.77	0.929895	7.37	Cuttle Bone 2	2015-11-04 14:07:03	Not Mature	F3
Achatinella	lila	2012	2012-10-10	2012-03-24	2012	6.4	Keiki	3.4	0.547945	9.8	Cuttle Bone 2	2016-03-23	Not Mature	F3
Achatinella	lila	2012	2012-10-10	2012-06-17 07:03:31	2012	4.95	Keiki	1.95	0.314263	4.01	Cuttle Bone 3	2016-06-16 07:03:31	Not Mature	F3
Achatinella	lila	2012	2012-10-10	2012-10-10	2012	2.42	Keiki		0	2.2	Cuttle Bone 2	2016-10-09	Not Mature	F3
Achatinella	lila	2012	2012-10-11	2009-06-07 01:55:12	2009	13.94	NonKeiki	4.44	3.34773	9.61	Cuttle Bone 2	2013-06-06 01:55:12	Not Mature	F3
Achatinella	lila	2012	2012-10-11	2009-11-08 11:31:12	2009	13.14	NonKeiki	3.64	2.92471	9.32	Cuttle Bone 2	2013-11-07 11:31:12	Not Mature	F3
Achatinella	lila	2012	2012-10-11	2010-06-01 01:26:24	2010	12.08	NonKeiki	2.58	2.36422	8.74	Cuttle Bone 2	2014-05-31 01:26:24	Not Mature	F3
Achatinella	lila	2012	2012-10-11	2011-11-02 11:17:38	2011	8.84	Keiki	5.84	0.941176	6.56	Cuttle Bone 2	2015-11-01 11:17:38	Not Mature	F3
Achatinella	lila	2012	2012-10-11	2011-11-30 16:56:28	2011	8.36	Keiki	5.36	0.86382	6.56	Cuttle Bone 2	2015-11-29 16:56:28	Not Mature	F3
Achatinella	lila	2012	2012-10-11	2012-02-06 22:35:17	2012	7.2	Keiki	4.2	0.676873	5.9	Cuttle Bone 2	2016-02-05 22:35:17	Not Mature	F3
Achatinella	lila	2012	2012-10-11	2012-04-21 01:24:42	2012	5.94	Keiki	2.94	0.473811	4.74	Cuttle Bone 2	2016-04-20 01:24:42	Not Mature	F3
Achatinella	lila	2012	2012-10-11	2012-06-29 11:17:38	2012	4.76	Keiki	1.76	0.283642	4.45	Cuttle Bone 1	2016-06-28 11:17:38	Not Mature	F3
Achatinella	lila	2012	2012-10-11	2012-09-09 05:38:49	2012	3.54	Keiki	0.54	0.0870266	2.95	Cuttle Bone 2	2016-09-08 05:38:49	Not Mature	F3
Achatinella	lila	2012	2012-10-12	2010-03-07 05:02:24	2010	12.53	NonKeiki	3.03	2.60216	8.77	Cuttle Bone 3	2014-03-06 05:02:24	Not Mature	F3
Achatinella	lila	2012	2012-10-12	2011-09-15 23:31:12	2011	9.64	NonKeiki	0.14	1.07403	7.02	Control 2	2015-09-14 23:31:12	Not Mature	F3
Achatinella	lila	2012	2012-10-12	2012-02-09 02:49:24	2012	7.18	Keiki	4.18	0.67365	6.35	Control 2	2016-02-08 02:49:24	Not Mature	F3
Achatinella	lila	2012	2012-10-12	2012-08-25 22:35:17	2012	3.8	Keiki	0.8	0.128928	3.04	Cuttle Bone 3	2016-08-24 22:35:17	Not Mature	F3
Achatinella	lila	2012	2012-10-12	2012-09-30 05:38:49	2012	3.2	Keiki	0.2	0.0322321	3	Cuttle Bone 3	2016-09-29 05:38:49	Not Mature	F3
Achatinella	lila	2012	2012-10-19	2010-01-01 19:12:00	2010	12.9	NonKeiki	3.4	2.79781	9.11	Population 2	2013-12-31 19:12:00	Not Mature	F3
Achatinella	lila	2012	2012-10-19	2012-08-21 04:14:07	2012	4	Keiki	1	0.16116	3.64	Orphans	2016-08-20 04:14:07	Not Mature	F3
Achatinella	lila	2012	2012-10-23	2008-12-04 05:16:48	2008	14.96	NonKeiki	5.46	3.88707	8.63	Control 1	2012-12-03 05:16:48	Not Mature	F3
Achatinella	lila	2012	2012-10-24	2009-04-23 04:19:12	2009	14.24	NonKeiki	4.74	3.50636	8.83	Cuttlebone 1	2013-04-22 04:19:12	Not Mature	F3
Achatinella	lila	2012	2012-10-24	2010-12-18 06:28:48	2010	11.11	NonKeiki	1.61	1.85132	7.47	Cuttlebone 1	2014-12-17 06:28:48	Not Mature	F3
Achatinella	lila	2012	2012-10-24	2011-12-11 22:35:17	2011	8.39	Keiki	5.39	0.868654	5.81	Cuttlebone 1	2015-12-10 22:35:17	Not Mature	F3
Achatinella	lila	2012	2012-10-24	2012-10-18 02:49:24	2012	3.1	Keiki	0.1	0.016116	2.86	Cuttlebone 1	2016-10-17 02:49:24	Not Mature	F3
Achatinella	lila	2012	2012-10-25	2009-04-24 04:19:12	2009	14.24	NonKeiki	4.74	3.50636	10.12	Cuttle Bone 1	2013-04-23 04:19:12	Not Mature	F3
Achatinella	lila	2012	2012-10-25	2011-03-08 09:36:00	2011	10.7	NonKeiki	1.2	1.63452	7.43	Cuttlebone 2	2015-03-07 09:36:00	Not Mature	F3
Achatinella	lila	2012	2012-10-25	2011-08-09 19:12:00	2011	9.9	NonKeiki	0.4	1.21151	7.65	Cuttle Bone 3	2015-08-08 19:12:00	Not Mature	F3
Achatinella	lila	2012	2012-10-25	2011-12-18 19:45:52	2011	8.29	Keiki	5.29	0.852538	7.01	Cuttlebone 2	2015-12-17 19:45:52	Not Mature	F3
Achatinella	lila	2012	2012-10-25	2011-12-30	2011	8.1	Keiki	5.1	0.821918	6.54	Cuttlebone 2	2015-12-29	Not Mature	F3
Achatinella	lila	2012	2012-10-25	2012-01-04 21:10:35	2012	8	Keiki	5	0.805802	7	Cuttlebone 2	2016-01-03 21:10:35	Not Mature	F3
Achatinella	lila	2012	2012-10-25	2012-04-02 16:56:28	2012	6.49	Keiki	3.49	0.56245	6.03	Cuttlebone 2	2016-04-01 16:56:28	Not Mature	F3
Achatinella	lila	2012	2012-10-25	2012-06-05 19:45:52	2012	5.4	Keiki	2.4	0.386785	5.64	Cuttlebone 2	2016-06-04 19:45:52	Not Mature	F3
Achatinella	lila	2012	2012-10-25	2012-06-16 09:52:56	2012	5.22	Keiki	2.22	0.357776	4.93	Cuttlebone 2	2016-06-15 09:52:56	Not Mature	F3
Achatinella	lila	2012	2012-10-25	2012-09-09 16:56:28	2012	3.77	Keiki	0.77	0.124093	3.06	Cuttlebone 2	2016-09-08 16:56:28	Not Mature	F3
Achatinella	lila	2012	2012-10-25	2012-10-25	2012	2.49	Keiki		0	1.94	Cuttlebone 2	2016-10-24	Not Mature	F3
Achatinella	lila	2012	2012-10-26	2010-02-12 12:57:36	2010	12.72	NonKeiki	3.22	2.70263	11.3	CaCO3 2	2014-02-11 12:57:36	Not Mature	F3
Achatinella	lila	2012	2012-10-26	2010-06-04 11:31:12	2010	12.14	NonKeiki	2.64	2.39595	8.06	CaCO3 3	2014-06-03 11:31:12	Not Mature	F3
Achatinella	lila	2012	2012-10-26	2010-11-29 00:57:36	2010	11.22	NonKeiki	1.72	1.90948	8.91	CaCO3 2	2014-11-28 00:57:36	Not Mature	F3
Achatinella	lila	2012	2012-10-26	2012-08-28 04:14:07	2012	4	Keiki	1	0.16116	3.69	CaCO3 3	2016-08-27 04:14:07	Not Mature	F3
Achatinella	lila	2012	2012-10-26	2012-10-01 07:03:31	2012	3.42	Keiki	0.42	0.0676873	3.24	CaCO3 3	2016-09-30 07:03:31	Not Mature	F3
Achatinella	lila	2012	2012-11-05	2011-08-26 14:09:36	2011	9.87	NonKeiki	0.37	1.19564	7.86	Population 1	2015-08-25 14:09:36	Not Mature	F3
Achatinella	lila	2012	2012-11-05	2011-10-21 09:52:56	2011	9.47	Keiki	6.47	1.04271	7.09	Population	2015-10-20 09:52:56	Not Mature	F3
Achatinella	lila	2012	2012-11-05	2011-11-06	2011	9.5	NonKeiki	0	1	7.32	Control 2	2015-11-05	Not Mature	F3
Achatinella	lila	2012	2012-11-05	2012-01-07 01:24:42	2012	8.15	Keiki	5.15	0.829976	6.56	Population 1	2016-01-06 01:24:42	Not Mature	F3
Achatinella	lila	2012	2012-11-05	2012-05-08 09:52:56	2012	6.07	Keiki	3.07	0.494762	5.26	Population 1	2016-05-07 09:52:56	Not Mature	F3
Achatinella	lila	2012	2012-11-05	2012-08-25 19:45:52	2012	4.21	Keiki	1.21	0.195004	3.9	Control 1	2016-08-24 19:45:52	Not Mature	F3
Achatinella	lila	2012	2012-11-05	2012-11-05	2012	2.69	Keiki		0	2.57	Control 1	2016-11-04	Not Mature	F3
Achatinella	lila	2012	2012-11-07	2009-07-19 12:28:48	2009	13.86	NonKeiki	4.36	3.30542	9.87	Cuttlebone 2	2013-07-18 12:28:48	Not Mature	F3
Achatinella	lila	2012	2012-11-07	2009-10-22 02:09:36	2009	13.37	NonKeiki	3.87	3.04633	8.33	Cuttlebone 2	2013-10-21 02:09:36	Not Mature	F3
Achatinella	lila	2012	2012-11-07	2009-12-17 01:26:24	2009	13.08	NonKeiki	3.58	2.89299	9.06	Cuttlebone 2	2013-12-16 01:26:24	Not Mature	F3
Achatinella	lila	2012	2012-11-07	2010-10-02 13:26:24	2010	11.58	NonKeiki	2.08	2.09984	7.73	Cuttlebone 2	2014-10-01 13:26:24	Not Mature	F3
Achatinella	lila	2012	2012-11-07	2011-08-26 15:50:24	2011	9.88	NonKeiki	0.38	1.20093	6.5	Cuttlebone 2	2015-08-25 15:50:24	Not Mature	F3
Achatinella	lila	2012	2012-11-07	2012-04-12 04:14:07	2012	6.55	Keiki	3.55	0.572119	5.83	Cuttlebone 2	2016-04-11 04:14:07	Not Mature	F3
Achatinella	lila	2012	2012-11-07	2012-05-03 22:35:17	2012	6.18	Keiki	3.18	0.51249	4.8	Cuttlebone 2	2016-05-02 22:35:17	Not Mature	F3
[truncated: 312 more rows]
