# Supplementary material for: Demographic and genetic factors in the recovery or demise of ex situ populations following a severe bottleneck in fifteen species of Hawaiian tree snails
Source: PeerJ. 2015 Nov 12;3:e1406. doi: 10.7717/peerj.1406 (PMC4647602; doi:10.7717/peerj.1406)
Supplement: Supplemental Information 8 [file peerj-03-1406-s012.xls]

## Sheet: Sheet1
GENUS	SPECIES	ID	YEAR COLLECTED	DATE COLLECTED	BIRTHDATE	BIRTHYEAR	LENGTH	Age Class	Calc1	Age_Calc	WIDTH	Generation	CAGE	Maturity	AliveAtMaturity?	1998	1999	2000	2001	2002	2003	2004	2005	2006	2007	2008	2009	2010	2011	2012	SUMMat	LivedToMaturity?
Achatinella	sowerbyana	NONE	1997	1997-02-05	1991-09-05	1991	17	NonKeiki	2	5.42466		FOUNDER	Peahinaia	1995-09-04	MATURE
Achatinella	sowerbyana	116 SM	1997	1997-08-19	1992-06-17	1992	16.65	NonKeiki	1.65	5.17534	11.06	FOUNDER	Peahinaia	1996-06-16	MATURE
Achatinella	sowerbyana	59 SM	2000	2000-07-21	1993-12-29	1993	18.6	NonKeiki	3.6	6.56438	9.9	FOUNDER	Peahinaia	1997-12-28	MATURE
Achatinella	sowerbyana	114 SM	2000	2000-07-21	1993-12-29	1993	18.6	NonKeiki	3.6	6.56438		FOUNDER	Peahinaia	1997-12-28	MATURE
Achatinella	sowerbyana	55SM	2000	2000-01-15	1994-05-28	1994	17.3	NonKeiki	2.3	5.63836		FOUNDER	Peahinaia	1998-05-27	MATURE
Achatinella	sowerbyana	121 SM	2002	2002-09-12	1996-04-01 14:24:00	1996	18.44	NonKeiki	3.44	6.45041	11.14	FOUNDER	Pulcherima	2000-03-31 14:24:00	MATURE
Achatinella	sowerbyana	25SM	2002	2002-07-01	1996-05-13	1996	18	NonKeiki	3	6.13699	10.49	FOUNDER	Pulcherima	2000-05-12	MATURE
Achatinella	sowerbyana	57SM	2001	2001-02-12	1996-08-15	1996	15.7	NonKeiki	0.7	4.49863	9.9	FOUNDER	Pulcherima	2000-08-14	MATURE
Achatinella	sowerbyana	56SM	2001	2001-01-18	1996-10-27 19:12:00	1996	15.32	NonKeiki	0.32	4.22795	9.55	FOUNDER	Peahinaia	2000-10-26 19:12:00	MATURE
Achatinella	sowerbyana	15SM	2002	2002-06-17	1997-04-02	1997	16.7	NonKeiki	1.7	5.21096	10.59	F1	Pulcherima	2001-04-01	MATURE
Achatinella	sowerbyana	117 SM	2002	2002-04-18	1997-06-24	1997	16.15	NonKeiki	1.15	4.81918	9.15	F1	Peahinaia	2001-06-23	MATURE
Achatinella	sowerbyana	58SM	2000	2000-08-03	1997-06-30 17:16:48	1997	13.46	NonKeiki	3.96	3.09392	8.84	F1	Peahinaia	2001-06-29 17:16:48	IMMATURE
Achatinella	sowerbyana	4 SM	2002	2002-07-16	1997-10-30	1997	16	NonKeiki	1	4.71233	9.72	F1	Pulcherima	2001-10-29	MATURE
Achatinella	sowerbyana	42SM	2004	2004-06-15	1997-12-16 09:36:00	1997	18.51	NonKeiki	3.51	6.50027	10.25	F1	Peahinaia	2001-12-15 09:36:00	MATURE
Achatinella	sowerbyana	NONE	1997	1997-12-23	1997-12-23	1997	3	Keiki	0	0		F1	Peahinaia	2001-12-22	IMMATURE
Achatinella	sowerbyana	46SM	2004	2004-06-13	1998-03-12 19:12:00	1998	18.17	NonKeiki	3.17	6.25808	11.3	F1	Peahinaia	2002-03-11 19:12:00	MATURE
Achatinella	sowerbyana	1SM	2004	2004-01-07	1998-06-02	1998	17.25	NonKeiki	2.25	5.60274	11.1	F1	Pulcherima	2002-06-01	MATURE
Achatinella	sowerbyana	36SM	2004	2004-05-05	1998-08-21	1998	17.4	NonKeiki	2.4	5.70959	9.3	F1	Peahinaia	2002-08-20	MATURE
Achatinella	sowerbyana	111 SM	1998	1998-09-01	1998-09-01	1998	3	Keiki	0	0	2.7	F1	Peahinaia	2002-08-31	IMMATURE
Achatinella	sowerbyana	38SM	2005	2005-01-24	1998-10-21 04:48:00	1998	18.18	NonKeiki	3.18	6.26521	10.23	F1	Peahinaia	2002-10-20 04:48:00	MATURE
Achatinella	sowerbyana	48SM	2002	2002-06-18	1998-11-07 13:55:12	1998	14.44	NonKeiki	4.94	3.61211	10.17	F1	Peahinaia	2002-11-06 13:55:12	IMMATURE
Achatinella	sowerbyana	108 SM	1999	1999-02-02	1998-11-26 08:28:14	1998	4.15	Keiki	1.15	0.185334		F1	Peahinaia	2002-11-25 08:28:14	IMMATURE
Achatinella	sowerbyana	110 SM	1998	1998-12-22	1998-12-10 05:38:49	1998	3.2	Keiki	0.2	0.0322321	3.2	F1	Peahinaia	2002-12-09 05:38:49	IMMATURE
Achatinella	sowerbyana	49SM	2004	2004-05-05	1999-04-12	1999	16.5	NonKeiki	1.5	5.06849	9	F1	Peahinaia	2003-04-11	MATURE
Achatinella	sowerbyana	118 SM	2003	2003-11-06	1999-06-30	1999	15.5	NonKeiki	0.5	4.35616	10.2	F1		2003-06-29	MATURE
Achatinella	sowerbyana	24SM	2002	2002-07-01	1999-09-11 20:52:48	1999	12.91	NonKeiki	3.41	2.8031	8.78	F1	Pulcherima	2003-09-10 20:52:48	IMMATURE
Achatinella	sowerbyana	106 SM	1999	1999-11-19	1999-11-16 01:24:42	1999	3.05	Keiki	0.05	0.00805802		F1	Peahinaia	2003-11-15 01:24:42	IMMATURE
Achatinella	sowerbyana	50SM	2005	2005-06-15	1999-12-23 04:48:00	1999	17.08	NonKeiki	2.08	5.48164	9.84	F1	Peahinaia	2003-12-22 04:48:00	MATURE
Achatinella	sowerbyana	52SM	2002	2002-06-08	2000-01-23 04:48:00	2000	12.1	NonKeiki	2.6	2.37479	8.68	F1	Peahinaia	2004-01-22 04:48:00	IMMATURE
Achatinella	sowerbyana	95 SM	2000	2000-02-29	2000-02-10 18:21:10	2000	3.31	Keiki	0.31	0.0499597		F1	Peahinaia	2004-02-09 18:21:10	IMMATURE
Achatinella	sowerbyana	97 SM	2000	2000-08-16	2000-04-19 18:21:10	2000	5.01	Keiki	2.01	0.323932		F1	Pulcherima	2004-04-18 18:21:10	IMMATURE
Achatinella	sowerbyana	94 SM	2000	2000-11-06	2000-07-26 01:24:42	2000	4.75	Keiki	1.75	0.282031		F1	Pulcherima	2004-07-25 01:24:42	IMMATURE
Achatinella	sowerbyana	123 SM	2006	2006-03-07	2000-08-23 09:36:00	2000	17.16	NonKeiki	2.16	5.53863	10.24	F1	Pulcherima	2004-08-22 09:36:00	MATURE
Achatinella	sowerbyana	2SM	2002	2002-08-27	2000-08-29 03:50:24	2000	11.38	NonKeiki	1.88	1.99408	8.29	F1	Pulcherima	2004-08-28 03:50:24	IMMATURE
Achatinella	sowerbyana	3SM	2002	2002-08-27	2000-10-29 22:04:48	2000	11.06	NonKeiki	1.56	1.82488	7.46	F1	Pulcherima	2004-10-28 22:04:48	IMMATURE
Achatinella	sowerbyana	113 SM	2002	2002-01-04	2001-01-13 02:49:24	2001	9.05	Keiki	6.05	0.97502	6.6	F1	Peahinaia	2005-01-12 02:49:24	IMMATURE
Achatinella	sowerbyana	51SM	2002	2002-02-15	2001-03-31 09:52:56	2001	8.45	Keiki	5.45	0.878324	6.42	F1	Peahinaia	2005-03-30 09:52:56	IMMATURE
Achatinella	sowerbyana	11SM	2007	2007-04-03	2001-06-10	2001	17.55	NonKeiki	2.55	5.81644	10.3	F1	Pulcherima	2005-06-09	MATURE
Achatinella	sowerbyana	72 SM'	2001	2001-07-02	2001-07-02	2001	3	Keiki	0	0	3.6	F1	Pulcherima	2005-07-01	IMMATURE
Achatinella	sowerbyana	54SM	2002	2002-01-04	2001-07-04 11:17:38	2001	6.12	Keiki	3.12	0.50282	5.12	F1	Peahinaia	2005-07-03 11:17:38	IMMATURE
Achatinella	sowerbyana	27SM	2002	2002-08-13	2001-08-30 08:28:14	2001	8.91	Keiki	5.91	0.952458	7.09	F1	Pulcherima	2005-08-29 08:28:14	IMMATURE
Achatinella	sowerbyana	120 SM	2002	2002-09-24	2001-09-30 04:14:07	2001	9.1	Keiki	6.1	0.983078	6.48	F1	Pulcherima	2005-09-29 04:14:07	IMMATURE
Achatinella	sowerbyana	NONE	2002	2002-04-18	2001-10-14 16:56:28	2001	6.15	Keiki	3.15	0.507655	4.15	F1	Peahinaia	2005-10-13 16:56:28	IMMATURE
Achatinella	sowerbyana	53SM	2002	2002-03-01	2001-11-28 01:24:42	2001	4.58	Keiki	1.58	0.254633	3.95	F1	Peahinaia	2005-11-27 01:24:42	IMMATURE
Achatinella	sowerbyana	112 SM	2001	2001-12-20	2001-12-20	2001	2.31	Keiki	0	0		F1	Poamoho	2005-12-19	IMMATURE
Achatinella	sowerbyana	107 SM	2002	2002-03-25	2001-12-29 16:56:28	2001	4.45	Keiki	1.45	0.233683	4.32	F1	Pulcherima	2005-12-28 16:56:28	IMMATURE
Achatinella	sowerbyana	99 SM	2002	2002-06-04	2002-02-05 18:21:10	2002	5.01	Keiki	2.01	0.323932	4.31	F2	Peahinaia	2006-02-04 18:21:10	IMMATURE
Achatinella	sowerbyana	16SM	2007	2007-03-07	2002-02-18 19:12:00	2002	16.47	NonKeiki	1.47	5.04712	11.5	F2	Pulcherima	2006-02-17 19:12:00	MATURE
Achatinella	sowerbyana	92 SM	2002	2002-06-17	2002-03-06 15:31:45	2002	4.74	Keiki	1.74	0.280419	3.28	F2	Pulcherima	2006-03-05 15:31:45	IMMATURE
Achatinella	sowerbyana	14SM	2006	2006-04-03	2002-04-04	2002	15	NonKeiki	0	4	10.2	F2	Pulcherima	2006-04-03	IMMATURE
Achatinella	sowerbyana	62 SM	2002	2002-07-16	2002-04-24 15:31:45	2002	4.4	Keiki	1.4	0.225624	3.91	F2	Pulcherima	2006-04-23 15:31:45	IMMATURE
Achatinella	sowerbyana	103 SM	2002	2002-08-02	2002-07-08 21:10:35	2002	3.41	Keiki	0.41	0.0660757	3.23	F2	Peahinaia	2006-07-07 21:10:35	IMMATURE
Achatinella	sowerbyana	22SM	2005	2005-10-07	2002-10-14 06:00:00	2002	13.25	NonKeiki	3.75	2.98288	9.55	F2	Pulcherima	2006-10-13 06:00:00	IMMATURE
Achatinella	sowerbyana	102 SM	2002	2002-12-16	2002-10-18 04:14:07	2002	4	Keiki	1	0.16116	3.56	F2	Pulcherima	2006-10-17 04:14:07	IMMATURE
Achatinella	sowerbyana	10SM	2006	2006-09-19	2002-11-09 20:52:48	2002	14.91	NonKeiki	5.41	3.86063	9.82	F2	Pulcherima	2006-11-08 20:52:48	IMMATURE
Achatinella	sowerbyana	96 SM	2002	2002-12-30	2002-12-23 12:42:21	2002	3.11	Keiki	0.11	0.0177276	2.65	F2	Pulcherima	2006-12-22 12:42:21	IMMATURE
Achatinella	sowerbyana	41SM	2008	2008-08-21	2003-01-17 14:24:00	2003	17.24	NonKeiki	2.24	5.59562	11.33	F2	Peahinaia	2007-01-16 14:24:00	MATURE
Achatinella	sowerbyana	5SM	2006	2006-11-29	2003-02-06 05:45:36	2003	14.82	NonKeiki	5.32	3.81304	10.06	F2	Pulcherima	2007-02-05 05:45:36	IMMATURE
Achatinella	sowerbyana	20SM	2007	2007-05-14	2003-02-13	2003	15.35	NonKeiki	0.35	4.24932	10.1	F2	Pulcherima	2007-02-12	MATURE
Achatinella	sowerbyana	122 SM	2006	2006-05-02	2003-03-02 16:48:00	2003	13.6	NonKeiki	4.1	3.16795	8.95	F2	Pulcherima	2007-03-01 16:48:00	IMMATURE
Achatinella	sowerbyana	90 SM	2003	2003-04-16	2003-04-10 16:56:28	2003	3.09	Keiki	0.09	0.0145044	3.1	F2	Peahinaia	2007-04-09 16:56:28	IMMATURE
Achatinella	sowerbyana	91 SM	2003	2003-04-16	2003-04-16	2003	2.9	Keiki	0	0	3.15	F2	Peahinaia	2007-04-15	IMMATURE
Achatinella	sowerbyana	85 SM	2003	2003-06-27	2003-05-13 21:10:35	2003	3.75	Keiki	0.75	0.12087	3.61	F2	Peahinaia	2007-05-12 21:10:35	IMMATURE
Achatinella	sowerbyana	78 SM	2003	2003-10-07	2003-05-18 05:38:49	2003	5.41	Keiki	2.41	0.388396	4.7	F2	Peahinaia	2007-05-17 05:38:49	IMMATURE
Achatinella	sowerbyana	NONE	2008	2008-10-29	2003-05-18 14:24:00	2003	17.04	NonKeiki	2.04	5.45315	9.15	F2	Poamoho	2007-05-17 14:24:00	MATURE
Achatinella	sowerbyana	89 SM	2003	2003-07-16	2003-05-24 01:24:42	2003	3.9	Keiki	0.9	0.145044	3.54	F2	Peahinaia	2007-05-23 01:24:42	IMMATURE
Achatinella	sowerbyana	88 SM	2003	2003-05-27	2003-05-27	2003	2.14	Keiki	0	0	2.13	F2	Peahinaia	2007-05-26	IMMATURE
Achatinella	sowerbyana	67 SM	2003	2003-08-04	2003-06-17 08:28:14	2003	3.81	Keiki	0.81	0.13054	3.91	F2	Peahinaia	2007-06-16 08:28:14	IMMATURE
Achatinella	sowerbyana	131 SM	2009	2009-08-10	2003-06-25 14:24:00	2003	17.99	NonKeiki	2.99	6.12986	9.92	F2	Peahinaia	2007-06-24 14:24:00	MATURE
Achatinella	sowerbyana	104 SM	2003	2003-10-07	2003-07-20 18:21:10	2003	4.33	Keiki	1.33	0.214343	3.5	F2	Peahinaia	2007-07-19 18:21:10	IMMATURE
Achatinella	sowerbyana	105 SM	2003	2003-10-21	2003-08-24 08:28:14	2003	3.98	Keiki	0.98	0.157937	3.09	F2		2007-08-23 08:28:14	IMMATURE
Achatinella	sowerbyana	47SM	2003	2003-12-04	2003-09-27 08:28:14	2003	4.15	Keiki	1.15	0.185334	3.95	F2	Peahinaia	2007-09-26 08:28:14	IMMATURE
Achatinella	sowerbyana	109 SM	2003	2003-11-03	2003-10-04	2003	3.51	Keiki	0.51	0.0821918	3.31	F2	Pulcherima	2007-10-03	IMMATURE
Achatinella	sowerbyana	29SM	2004	2004-01-07	2003-10-22 12:42:21	2003	4.3	Keiki	1.3	0.209508	3.4	F2	Pulcherima	2007-10-21 12:42:21	IMMATURE
Achatinella	sowerbyana	93 SM	2003	2003-11-29	2003-11-29	2003	2.85	Keiki	0	0	2.82	F2	Peahinaia	2007-11-28	IMMATURE
Achatinella	sowerbyana	130 SM	2009	2009-09-17	2003-12-10 14:24:00	2003	17.49	NonKeiki	2.49	5.7737	6.91	F2	Peahinaia	2007-12-09 14:24:00	MATURE
Achatinella	sowerbyana	124 SM	2006	2006-03-22	2003-12-16 17:31:12	2003	11.89	NonKeiki	2.39	2.26375	6.74	F2	Peahinaia	2007-12-15 17:31:12	IMMATURE
Achatinella	sowerbyana	82 SM	2004	2004-01-30	2004-01-27 01:24:42	2004	3.05	Keiki	0.05	0.00805802	2.9	F2	Peahinaia	2008-01-26 01:24:42	IMMATURE
Achatinella	sowerbyana	63 SM	2004	2004-03-29	2004-01-28 09:52:56	2004	4.03	Keiki	1.03	0.165995	3.81	F2	Peahinaia	2008-01-27 09:52:56	IMMATURE
Achatinella	sowerbyana	43SM	2004	2004-04-22	2004-03-05 22:35:17	2004	3.8	Keiki	0.8	0.128928	3.63	F2	Peahinaia	2008-03-04 22:35:17	IMMATURE
Achatinella	sowerbyana	98 SM	2004	2004-05-20	2004-03-16 07:03:31	2004	4.1	Keiki	1.1	0.177276	3.05	F2	Peahinaia	2008-03-15 07:03:31	IMMATURE
Achatinella	sowerbyana	28SM	2004	2004-06-07	2004-03-23 02:49:24	2004	4.29	Keiki	1.29	0.207897	3.3	F2	Pulcherima	2008-03-22 02:49:24	IMMATURE
Achatinella	sowerbyana	45SM	2004	2004-10-20	2004-03-27 12:42:21	2004	6.51	Keiki	3.51	0.565673	4.03	F2	Peahinaia	2008-03-26 12:42:21	IMMATURE
Achatinella	sowerbyana	86 SM	2004	2004-05-05	2004-05-04 09:52:56	2004	3.01	Keiki	0.01	0.0016116	2.95	F2	Peahinaia	2008-05-03 09:52:56	IMMATURE
Achatinella	sowerbyana	61 SM	2004	2004-07-14	2004-05-26 04:14:07	2004	3.83	Keiki	0.83	0.133763	3	F2	Peahinaia	2008-05-25 04:14:07	IMMATURE
Achatinella	sowerbyana	60 SM	2004	2004-06-20	2004-06-20	2004	2.78	Keiki	0	0	2.11	F2	Peahinaia	2008-06-19	IMMATURE
Achatinella	sowerbyana	37SM	2009	2009-07-06	2004-06-27 14:24:00	2004	16.44	NonKeiki	1.44	5.02575	7.26	F2	Peahinaia	2008-06-26 14:24:00	MATURE
Achatinella	sowerbyana	133 SM	2010	2010-11-29	2004-06-29	2004	18.4	NonKeiki	3.4	6.42192	10.59	F2	Pulcherima	2008-06-28	MATURE
Achatinella	sowerbyana	68 SM	2004	2004-06-30	2004-06-30	2004	2.41	Keiki	0	0	1.8	F2	Peahinaia	2008-06-29	IMMATURE
Achatinella	sowerbyana	32SM	2007	2007-02-22	2004-07-13 08:24:00	2004	12.55	NonKeiki	3.05	2.61274	7.85	F2	Pulcherima	2008-07-12 08:24:00	IMMATURE
Achatinella	sowerbyana	135 SM	2010	2010-06-03	2004-08-02 04:48:00	2004	17.58	NonKeiki	2.58	5.83781	9.98	F2	Peahinaia	2008-08-01 04:48:00	MATURE
Achatinella	sowerbyana	19SM	2007	2007-03-07	2004-08-10 18:57:36	2004	12.47	NonKeiki	2.97	2.57044	8.4	F2	Pulcherima	2008-08-09 18:57:36	IMMATURE
Achatinella	sowerbyana	21SM	2005	2005-01-26	2004-08-29	2004	5.55	Keiki	2.55	0.410959	4.16	F2	Pulcherima	2008-08-28	IMMATURE
Achatinella	sowerbyana	127 SM	2009	2009-10-14	2004-09-07	2004	16.55	NonKeiki	1.55	5.10411	7.74	F2	Peahinaia	2008-09-06	MATURE
Achatinella	sowerbyana	13SM	2004	2004-12-16	2004-10-18 04:14:07	2004	4	Keiki	1	0.16116	3.18	F2	Pulcherima	2008-10-17 04:14:07	IMMATURE
Achatinella	sowerbyana	44SM	2006	2006-11-29	2004-10-19 16:48:00	2004	11.6	NonKeiki	2.1	2.11041	7.76	F2	Peahinaia	2008-10-18 16:48:00	IMMATURE
Achatinella	sowerbyana	65 SM	2004	2004-12-01	2004-11-07 11:17:38	2004	3.4	Keiki	0.4	0.0644641	2.55	F2	Peahinaia	2008-11-06 11:17:38	IMMATURE
Achatinella	sowerbyana	30SM	2007	2007-02-22	2004-12-12 19:40:48	2004	11.76	NonKeiki	2.26	2.19501	7.85	F2	Pulcherima	2008-12-11 19:40:48	IMMATURE
Achatinella	sowerbyana	101 SM	2004	2004-12-15	2004-12-15	2004	2.88	Keiki	0	0	2.45	F2	Peahinaia	2008-12-14	IMMATURE
Achatinella	sowerbyana	19SM	2007	2007-02-22	2005-04-11 11:31:12	2005	11.14	NonKeiki	1.64	1.86718	7.45	F2	Pulcherima	2009-04-10 11:31:12	IMMATURE
Achatinella	sowerbyana	8SM	2006	2006-03-07	2005-05-16 21:10:35	2005	8	Keiki	5	0.805802	7.01	F2	Pulcherima	2009-05-15 21:10:35	IMMATURE
Achatinella	sowerbyana	33SM	2010	2010-02-10	2005-08-13	2005	15.7	NonKeiki	0.7	4.49863	8.5	F2	Peahinaia	2009-08-12	MATURE
Achatinella	sowerbyana	18SM	2007	2007-02-22	2005-09-16 17:45:36	2005	10.32	NonKeiki	0.82	1.43359	7.4	F2	Pulcherima	2009-09-15 17:45:36	IMMATURE
Achatinella	sowerbyana	35SM	2011	2011-12-13	2005-09-29	2005	18.1	NonKeiki	3.1	6.20822	10.98	F2	Peahinaia	2009-09-28	MATURE
Achatinella	sowerbyana	7SM	2007	2007-02-22	2005-10-29 04:48:00	2005	10.1	NonKeiki	0.6	1.31726	6.49	F2	Pulcherima	2009-10-28 04:48:00	IMMATURE
Achatinella	sowerbyana	74 SM	2006	2006-05-02	2006-01-30 19:45:52	2006	4.55	Keiki	1.55	0.249799	3.61	F2	Pulcherima	2010-01-29 19:45:52	IMMATURE
Achatinella	sowerbyana	71 SM	2006	2006-05-02	2006-02-14 12:42:21	2006	4.3	Keiki	1.3	0.209508	3.22	F2	Pulcherima	2010-02-13 12:42:21	IMMATURE
Achatinella	sowerbyana	125 SM	2009	2009-10-29	2006-04-01 03:50:24	2006	14.38	NonKeiki	4.88	3.58038	8.62	F2	Peahinaia	2010-03-31 03:50:24	IMMATURE
Achatinella	sowerbyana	132 SM	2009	2009-04-20	2006-04-27 06:00:00	2006	13.25	NonKeiki	3.75	2.98288	8.43	F2	Peahinaia	2010-04-26 06:00:00	IMMATURE
Achatinella	sowerbyana	129 SM	2010	2010-11-02	2006-05-18	2006	15.65	NonKeiki	0.65	4.46301	10.12	F2	Pulcherima	2010-05-17	MATURE
Achatinella	sowerbyana	138 SM	2012	2012-01-03	2006-08-12 09:36:00	2006	16.96	NonKeiki	1.96	5.39616	10.2	F2	Peahinaia	2010-08-11 09:36:00	MATURE
Achatinella	sowerbyana	6SM	2011	2011-08-23	2006-09-22 14:24:00	2006	16.29	NonKeiki	1.29	4.9189	9.72	F2	Pulcherima	2010-09-21 14:24:00	MATURE
Achatinella	sowerbyana	17SM	2011	2011-11-21	2006-11-04 19:12:00	2006	16.47	NonKeiki	1.47	5.04712	11.54	F2	Pulcherima	2010-11-03 19:12:00	MATURE
Achatinella	sowerbyana	136 SM	2011	2011-11-07	2006-11-29 19:12:00	2006	16.32	NonKeiki	1.32	4.94027	10.78	F2	Peahinaia	2010-11-28 19:12:00	MATURE
Achatinella	sowerbyana	26SM	2007	2007-01-10	2006-12-11 14:07:03	2006	3.5	Keiki	0.5	0.0805802	3.5	F2	Pulcherima	2010-12-10 14:07:03	IMMATURE
Achatinella	sowerbyana	80 SM	2007	2007-03-22	2007-03-16 02:49:24	2007	3.1	Keiki	0.1	0.016116	3	F3	Peahinaia	2011-03-15 02:49:24	IMMATURE
Achatinella	sowerbyana	128 SM	2011	2011-09-27	2007-03-19 14:24:00	2007	15.74	NonKeiki	0.74	4.52712	9.53	F3	Peahinaia	2011-03-18 14:24:00	MATURE
Achatinella	sowerbyana	70 SM	2007	2007-04-03	2007-04-03	2007	3	Keiki	0	0	2.7	F3	Pulcherima	2011-04-02	IMMATURE
Achatinella	sowerbyana	NONE	2009	2009-08-10	2007-04-17 10:19:12	2007	11.99	NonKeiki	2.49	2.31663	6.92	F3	Peahinaia	2011-04-16 10:19:12	IMMATURE
Achatinella	sowerbyana	134 SM	2010	2010-01-25	2007-05-14 12:57:36	2007	12.72	NonKeiki	3.22	2.70263	9.69	F3	Pulcherima	2011-05-13 12:57:36	IMMATURE
Achatinella	sowerbyana	23SM	2011	2011-01-03	2007-05-21 17:16:48	2007	14.46	NonKeiki	4.96	3.62268	9.1	F3	Pulcherima	2011-05-20 17:16:48	IMMATURE
Achatinella	sowerbyana	12SM	2011	2011-01-03	2007-07-10 21:36:00	2007	14.2	NonKeiki	4.7	3.48521	10.31	F3	Pulcherima	2011-07-09 21:36:00	IMMATURE
Achatinella	sowerbyana	137 SM	2011	2011-11-15	2007-08-11 19:12:00	2007	15.37	NonKeiki	0.37	4.26356	10.18	F3	Peahinaia	2011-08-10 19:12:00	MATURE
Achatinella	sowerbyana	31SM	2010	2010-10-19	2007-09-21 12:14:24	2007	13.43	NonKeiki	3.93	3.07805	8.62	F3	Pulcherima	2011-09-20 12:14:24	IMMATURE
Achatinella	sowerbyana	83 SM	2008	2008-01-08	2007-10-21 18:21:10	2007	4.33	Keiki	1.33	0.214343	3.61	F3	Peahinaia	2011-10-20 18:21:10	IMMATURE
Achatinella	sowerbyana	66 SM	2007	2007-11-16	2007-10-28 04:14:07	2007	3.32	Keiki	0.32	0.0515713	2.68	F3	Peahinaia	2011-10-27 04:14:07	IMMATURE
Achatinella	sowerbyana	39SM	2011	2011-11-15	2008-02-01 21:21:36	2008	14.77	NonKeiki	5.27	3.7866	9.48	F3	Peahinaia	2012-01-31 21:21:36	IMMATURE
Achatinella	sowerbyana	69 SM	2009	2009-02-26	2008-02-20 05:38:49	2008	9.32	Keiki	6.32	1.01853	5.44	F3	Peahinaia	2012-02-19 05:38:49	IMMATURE
Achatinella	sowerbyana	84 SM	2008	2008-04-15	2008-03-04 19:45:52	2008	3.7	Keiki	0.7	0.112812	2.71	F3	Peahinaia	2012-03-03 19:45:52	IMMATURE
Achatinella	sowerbyana	NONE	2008	2008-09-10	2008-09-10	2008	2.9	Keiki	0	0	2.1	F3	Poamoho	2012-09-09	IMMATURE
Achatinella	sowerbyana	73 SM	2008	2008-10-30	2008-10-30	2008	2.61	Keiki	0	0	2.14	F3	Peahinaia	2012-10-29	IMMATURE
Achatinella	sowerbyana	75 SM	2008	2008-12-01	2008-12-01	2008	2.7	Keiki	0	0	2.74	F3	Peahinaia	2012-11-30	IMMATURE
Achatinella	sowerbyana	126 SM	2009	2009-12-18	2008-12-12 09:52:56	2008	9.3	Keiki	6.3	1.01531	6.88	F3	Peahinaia	2012-12-11 09:52:56	IMMATURE
Achatinella	sowerbyana	81 SM	2008	2008-12-29	2008-12-29	2008	2.9	Keiki	0	0	2.3	F3	Hypalon	2012-12-28	IMMATURE
Achatinella	sowerbyana	76 SM	2009	2009-01-26	2009-01-20 02:49:24	2009	3.1	Keiki	0.1	0.016116	2.6	F3	Poamoho	2013-01-19 02:49:24	IMMATURE
Achatinella	sowerbyana	77 SM	2009	2009-04-03	2009-03-22 19:45:52	2009	3.19	Keiki	0.19	0.0306205	2.53	F3	Peahinaia	2013-03-21 19:45:52	IMMATURE
Achatinella	sowerbyana	34SM	2012	2012-01-24	2009-06-24	2009	12.5	NonKeiki	3	2.5863	9.35	F3	Peahinaia	2013-06-23	IMMATURE
Achatinella	sowerbyana	64 SM	2009	2009-09-17	2009-09-17	2009	2.75	Keiki	0	0	1.91	F3	Peahinaia	2013-09-16	IMMATURE
Achatinella	sowerbyana	79 SM	2012	2012-06-17	2012-04-16 05:38:49	2012	4.05	Keiki	1.05	0.169218	3.22	F4	Pulcherima	2016-04-15 05:38:49	IMMATURE
Achatinella	sowerbyana	NONE	2012	2012-10-24	2012-07-10 16:56:28	2012	4.79	Keiki	1.79	0.288477	4.31	F4	Peahinaia	2016-07-09 16:56:28	IMMATURE
