# Supplementary material for: Demographic and genetic factors in the recovery or demise of ex situ populations following a severe bottleneck in fifteen species of Hawaiian tree snails
Source: PeerJ. 2015 Nov 12;3:e1406. doi: 10.7717/peerj.1406 (PMC4647602; doi:10.7717/peerj.1406)
Supplement: Supplemental Information 10 [file peerj-03-1406-s014.xls]

## Sheet: Sheet1
GENUS	SPECIES	ID	YEAR COLLECTED	DATE COLLECTED	BIRTHDATE	BIRTHYEAR	LENGTH	Age Class	Calc1	Age_Calc	WIDTH	Generation	CAGE	Maturity	AliveAtMaturity?
Partulina	perdix	NONE	2001	2001-02-13	1995-06-01	1995	19.55	NonKeiki	9.55	5.70959		FOUNDER		1998-11-29 12:00:00	yes
Partulina	perdix	NONE	2002	2002-12-17	1997-04-15 14:24:00	1997	19.48	NonKeiki	9.48	5.67507	10.51	FOUNDER		2000-10-14 02:24:00	yes
Partulina	perdix	NONE	2002	2002-11-21	2001-11-12 14:24:00	2001	10.06	NonKeiki	0.06	1.02301	5.71	F1		2005-05-13 02:24:00	no
Partulina	perdix	NONE	2003	2003-01-26	2001-07-30 19:12:00	2001	11.28	NonKeiki	1.28	1.49096	7.1	F1		2005-01-28 07:12:00	no
Partulina	perdix	NONE	2002	2002-03-13	2002-01-12 16:00:00	2002	5.89	Keiki	0.89	0.162557	4.25	F1		2005-07-13 04:00:00	no
Partulina	perdix	NONE	2002	2002-05-22	2002-03-20 08:00:00	2002	5.94	Keiki	0.94	0.171689	3.25	F1		2005-09-17 20:00:00	no
Partulina	perdix	NONE	2007	2007-04-08	2003-07-03 04:48:00	2003	15.61	NonKeiki	5.61	3.76658	10.15	F1		2006-12-31 16:48:00	yes
Partulina	perdix	NONE	2008	2008-08-11	2004-09-10 09:36:00	2004	15.92	NonKeiki	5.92	3.91945	9.75	F1		2008-03-10 21:36:00	yes
Partulina	perdix	NONE	2005	2005-04-03	2005-04-03	2005	3.65	Keiki	0	0	2.55	F1		2008-10-01 12:00:00	no
Partulina	perdix	NONE	2005	2005-12-30	2005-12-14	2005	5.24	Keiki	0.24	0.0438356	3	F1		2009-06-13 12:00:00	no
Partulina	perdix	NONE	2010	2010-09-08	2005-01-02	2005	19.5	NonKeiki	9.5	5.68493	9.29	F1		2008-07-02 12:00:00	yes
Partulina	perdix	NONE	2006	2006-12-01	2006-12-01	2006	4.2	Keiki	0	0	2.94	F2		2010-05-31 12:00:00	no
Partulina	perdix	NONE	2006	2006-02-23	2006-02-23	2006	4.25	Keiki	0	0	2.01	F2		2009-08-23 12:00:00	no
Partulina	perdix	NONE	2006	2006-05-22	2006-05-22	2006	4.55	Keiki	0	0	3.06	F2		2009-11-19 12:00:00	no
Partulina	perdix	NONE	2010	2010-10-19	2006-04-05 14:24:00	2006	17.18	NonKeiki	7.18	4.54082	10.15	F2		2009-10-04 02:24:00	yes
Partulina	perdix	NONE	2007	2007-05-18	2007-05-18	2007	1.68	Keiki	0	0	1.64	F2		2010-11-15 12:00:00	no
Partulina	perdix	NONE	2007	2007-10-07	2007-10-07	2007	3.52	Keiki	0	0	3.66	F2		2011-04-06 12:00:00	no
Partulina	perdix	NONE	2007	2007-04-08	2007-04-08	2007	4.45	Keiki	0	0	2.74	F2		2010-10-06 12:00:00	no
Partulina	perdix	NONE	2008	2008-06-26	2008-06-22	2008	5.06	Keiki	0.06	0.0109589	2.9	F2		2011-12-21 12:00:00	no
Partulina	perdix	NONE	2013	2013-10-18	2008-04-15	2008	19.15	NonKeiki	9.15	5.51233	11	F2		2011-10-14 12:00:00	yes
