# Supplementary material for: Demographic and genetic factors in the recovery or demise of ex situ populations following a severe bottleneck in fifteen species of Hawaiian tree snails
Source: PeerJ. 2015 Nov 12;3:e1406. doi: 10.7717/peerj.1406 (PMC4647602; doi:10.7717/peerj.1406)
Supplement: Supplemental Information 12 [file peerj-03-1406-s016.xls]

## Sheet: Sheet1
GENUS	SPECIES	ID	YEAR COLLECTED	DATE COLLECTED	BIRTHDATE	BIRTHYEAR	LENGTH	Age Class	Calc1	Age_Calc	WIDTH	Generation	Maturity	AliveAtMaturity?	DATE COLLECTED	1998	1999	2000	2001	2002	2003	2004	2005	2006	2007	2008	2009	2010	2011	2012	SUMMat	LivedToMaturity?
Partulina	proxima	NONE	1996	1996-10-27	1989-09-07 19:12:00	1989	21.21	NonKeiki	5.21	7.14027	13.3	FOUNDER	1993-09-06 19:12:00	YES	1996-10-27
Partulina	proxima	NONE	1996	1996-11-16	1990-07-15 04:48:00	1990	19.89	NonKeiki	3.89	6.34466	11.84	FOUNDER	1994-07-14 04:48:00	YES	1996-11-16
Partulina	proxima	NONE	1997	1997-05-01	1990-12-04	1990	20	NonKeiki	4	6.41096		FOUNDER	1994-12-03	YES	1997-05-01
Partulina	proxima	NONE	1991	1991-08-22	1991-06-24 04:14:07	1991	4	Keiki	1	0.16116		F1	1995-06-23 04:14:07	NO	1991-08-22
Partulina	proxima	NONE	1991	1991-08-11	1991-08-11	1991	3	Keiki	0	0		F1	1995-08-10	NO	1991-08-11
Partulina	proxima	NONE	1998	1998-03-17	1992-05-27	1992	19	NonKeiki	3	5.80822		F1	1996-05-26	YES	1998-03-17
Partulina	proxima	NONE	1998	1998-09-14	1992-11-24	1992	19	NonKeiki	3	5.80822		F1	1996-11-23	YES	1998-09-14
Partulina	proxima	NONE	2000	2000-08-31	1994-09-06	1994	19.3	NonKeiki	3.3	5.98904	11.4	F1	1998-09-05	YES	2000-08-31
Partulina	proxima	NONE	2002	2002-06-20	1995-09-21 19:12:00	1995	20.56	NonKeiki	4.56	6.74849	10.91	F1	1999-09-20 19:12:00	YES	2002-06-20
Partulina	proxima	NONE	2002	2002-02-15	1995-12-25 19:12:00	1995	19.56	NonKeiki	3.56	6.14575	11.4	F1	1999-12-24 19:12:00	YES	2002-02-15
Partulina	proxima	NONE	2002	2002-02-15	1996-06-21	1996	18.75	NonKeiki	2.75	5.65753	10.93	F1	2000-06-20	YES	2002-02-15
Partulina	proxima	NONE	1996	1996-10-27	1996-08-29 04:14:07	1996	4	Keiki	1	0.16116		F1	2000-08-28 04:14:07	NO	1996-10-27
Partulina	proxima	NONE	1996	1996-10-27	1996-10-27	1996	3	Keiki	0	0		F1	2000-10-26	NO	1996-10-27
Partulina	proxima	NONE	2001	2001-11-21	1997-02-06 19:12:00	1997	17.31	NonKeiki	1.31	4.78959	10.84	F2	2001-02-05 19:12:00	YES	2001-11-21
Partulina	proxima	NONE	2002	2002-05-23	1997-08-08 19:12:00	1997	17.31	NonKeiki	1.31	4.78959	11.56	F2	2001-08-07 19:12:00	YES	2002-05-23
Partulina	proxima	NONE	1997	1997-10-28	1997-10-28	1997	3	Keiki	0	0		F2	2001-10-27	NO	1997-10-28
Partulina	proxima	NONE	1998	1998-01-08	1998-01-08	1998	3	Keiki	0	0		F2	2002-01-07	NO	1998-01-08
Partulina	proxima	NONE	1998	1998-01-08	1998-01-08	1998	3	Keiki	0	0		F2	2002-01-07	NO	1998-01-08
Partulina	proxima	NONE	2002	2002-11-21	1998-04-02 19:12:00	1998	17.06	NonKeiki	1.06	4.6389	11.14	F2	2002-04-01 19:12:00	YES	2002-11-21
Partulina	proxima	NONE	2002	2002-05-23	1998-05-19 14:24:00	1998	16.02	NonKeiki	0.02	4.01205	9.65	F2	2002-05-18 14:24:00	YES	2002-05-23
Partulina	proxima	NONE	2002	2002-02-15	1999-03-20 12:00:00	1999	14.65	NonKeiki	4.65	2.91096	8.8	F2	2003-03-19 12:00:00	NO	2002-02-15
Partulina	proxima	NONE	2002	2002-05-23	1999-03-29	1999	15.24	NonKeiki	5.24	3.15342	9.66	F2	2003-03-28	NO	2002-05-23
Partulina	proxima	NONE	2001	2001-08-15	1999-05-23	1999	13	NonKeiki	3	2.23288	8.98	F2	2003-05-22	NO	2001-08-15
Partulina	proxima	NONE	2002	2002-03-01	1999-06-10	1999	14.2	NonKeiki	4.2	2.72603	9.85	F2	2003-06-09	NO	2002-03-01
Partulina	proxima	NONE	2001	2001-12-21	1999-07-31 12:00:00	1999	13.39	NonKeiki	3.39	2.39315	8.81	F2	2003-07-30 12:00:00	NO	2001-12-21
Partulina	proxima	NONE	2002	2002-01-18	1999-08-21	1999	13.44	NonKeiki	3.44	2.4137	8.5	F2	2003-08-20	NO	2002-01-18
Partulina	proxima	NONE	2005	2005-04-21	1999-11-17 14:24:00	1999	18.37	NonKeiki	2.37	5.42849	10.86	F2	2003-11-16 14:24:00	YES	2005-04-21
Partulina	proxima	NONE	2002	2002-11-23	2000-05-08	2000	13.76	NonKeiki	3.76	2.54521	8.5	F2	2004-05-07	NO	2002-11-23
Partulina	proxima	NONE	2002	2002-02-15	2000-07-20	2000	11.4	NonKeiki	1.4	1.57534	7.13	F2	2004-07-19	NO	2002-02-15
Partulina	proxima	NONE	2002	2002-03-01	2000-09-02	2000	11.2	NonKeiki	1.2	1.49315	7.66	F2	2004-09-01	NO	2002-03-01
Partulina	proxima	NONE	2002	2002-09-10	2000-10-18	2000	12.18	NonKeiki	2.18	1.89589	8.59	F2	2004-10-17	NO	2002-09-10
Partulina	proxima	NONE	2002	2002-06-06	2000-10-25 12:00:00	2000	11.49	NonKeiki	1.49	1.61233	8.36	F2	2004-10-24 12:00:00	NO	2002-06-06
Partulina	proxima	NONE	2002	2002-06-06	2001-01-07	2001	11	NonKeiki	1	1.41096	8.05	F2	2005-01-06	NO	2002-06-06
Partulina	proxima	NONE	2002	2002-03-01	2001-01-15	2001	10.3	NonKeiki	0.3	1.12329	7.14	F2	2005-01-14	NO	2002-03-01
Partulina	proxima	NONE	2005	2005-04-21	2001-02-26	2001	16.25	NonKeiki	0.25	4.15068	11	F2	2005-02-25	YES	2005-04-21
Partulina	proxima	NONE	2006	2006-06-29	2001-06-05 14:24:00	2001	17.77	NonKeiki	1.77	5.06685	10.29	F2	2005-06-04 14:24:00	YES	2006-06-29
Partulina	proxima	NONE	2002	2002-06-06	2001-06-08 15:31:45	2001	9.16	Keiki	6.16	0.992748	6.09	F2	2005-06-07 15:31:45	NO	2002-06-06
Partulina	proxima	NONE	2002	2002-06-20	2001-06-19 16:56:28	2001	9.21	Keiki	6.21	1.00081	6.21	F2	2005-06-18 16:56:28	NO	2002-06-20
Partulina	proxima	NONE	2001	2001-12-21	2001-06-25 18:21:10	2001	6.03	Keiki	3.03	0.488316	4.6	F2	2005-06-24 18:21:10	NO	2001-12-21
Partulina	proxima	NONE	2001	2001-08-15	2001-08-15	2001	2.2	Keiki	0	0		F3	2005-08-14	NO	2001-08-15
Partulina	proxima	NONE	2001	2001-12-21	2001-08-21 19:45:52	2001	5.06	Keiki	2.06	0.33199	3.55	F3	2005-08-20 19:45:52	NO	2001-12-21
Partulina	proxima	NONE	2002	2002-07-19	2001-08-25 22:35:17	2001	8.56	Keiki	5.56	0.896052	5.49	F3	2005-08-24 22:35:17	NO	2002-07-19
Partulina	proxima	NONE	2006	2006-05-04	2001-09-05	2001	17.1	NonKeiki	1.1	4.66301	10.2	F3	2005-09-04	YES	2006-05-04
Partulina	proxima	NONE	2006	2006-06-29	2001-09-30 04:48:00	2001	17.24	NonKeiki	1.24	4.7474	9.66	F3	2005-09-29 04:48:00	YES	2006-06-29
Partulina	proxima	NONE	2006	2006-05-18	2001-10-11	2001	17	NonKeiki	1	4.60274		F3	2005-10-10	YES	2006-05-18
Partulina	proxima	NONE	2002	2002-07-18	2001-10-26 21:10:35	2001	7.49	Keiki	4.49	0.72361	4.99	F3	2005-10-25 21:10:35	NO	2002-07-18
Partulina	proxima	NONE	2002	2002-09-27	2001-10-27 07:03:31	2001	8.69	Keiki	5.69	0.917002	5.88	F3	2005-10-26 07:03:31	NO	2002-09-27
Partulina	proxima	NONE	2001	2001-12-21	2001-11-18 15:31:45	2001	3.55	Keiki	0.55	0.0886382		F3	2005-11-17 15:31:45	NO	2001-12-21
Partulina	proxima	NONE	2006	2006-06-29	2001-11-22	2001	17	NonKeiki	1	4.60274	6.25	F3	2005-11-21	YES	2006-06-29
Partulina	proxima	NONE	2006	2006-07-13	2001-12-17	2001	16.95	NonKeiki	0.95	4.5726	10.2	F3	2005-12-16	YES	2006-07-13
Partulina	proxima	NONE	2006	2006-02-09	2002-02-01 04:48:00	2002	16.04	NonKeiki	0.04	4.02411	9.21	F3	2006-01-31 04:48:00	YES	2006-02-09
Partulina	proxima	NONE	2006	2006-05-18	2002-05-19	2002	16	NonKeiki	0	4		F3	2006-05-18	NO	2006-05-18
Partulina	proxima	NONE	2005	2005-07-27	2002-05-24	2002	15.3	NonKeiki	5.3	3.17808	10.3	F3	2006-05-23	NO	2005-07-27
Partulina	proxima	NONE	2002	2002-12-04	2002-09-04 09:52:56	2002	4.54	Keiki	1.54	0.248187	3.46	F3	2006-09-03 09:52:56	NO	2002-12-04
Partulina	proxima	NONE	2003	2003-01-29	2002-11-17 15:31:45	2002	4.23	Keiki	1.23	0.198227	2.85	F3	2006-11-16 15:31:45	NO	2003-01-29
Partulina	proxima	NONE	2006	2006-02-22	2002-11-27 12:00:00	2002	15.45	NonKeiki	5.45	3.23973	9.6	F3	2006-11-26 12:00:00	NO	2006-02-22
Partulina	proxima	NONE	2006	2006-10-06	2003-04-27 12:00:00	2003	15.95	NonKeiki	5.95	3.44521	9.41	F3	2007-04-26 12:00:00	NO	2006-10-06
Partulina	proxima	NONE	2003	2003-05-15	2003-05-15	2003	2.45	Keiki	0	0	2.24	F3	2007-05-14	NO	2003-05-15
Partulina	proxima	NONE	2005	2005-04-21	2003-08-13	2003	11.68	NonKeiki	1.68	1.69041	10	F3	2007-08-12	NO	2005-04-21
Partulina	proxima	NONE	2007	2007-02-23	2003-10-04	2003	15.82	NonKeiki	5.82	3.39178	10.05	F3	2007-10-03	NO	2007-02-23
Partulina	proxima	NONE	2004	2004-01-30	2003-11-13 22:35:17	2003	4.31	Keiki	1.31	0.21112	2.62	F3	2007-11-12 22:35:17	NO	2004-01-30
Partulina	proxima	NONE	2004	2004-08-12	2004-05-06 22:35:17	2004	4.65	Keiki	1.65	0.265915	2.79	F3	2008-05-05 22:35:17	NO	2004-08-12
Partulina	proxima	NONE	2006	2006-02-22	2004-07-12	2004	11.5	NonKeiki	1.5	1.61644	7.6	F3	2008-07-11	NO	2006-02-22
Partulina	proxima	NONE	2005	2005-02-23	2004-09-30 02:49:24	2004	5.48	Keiki	2.48	0.399678	3.94	F3	2008-09-29 02:49:24	NO	2005-02-23
Partulina	proxima	NONE	2005	2005-02-23	2004-09-30 02:49:24	2004	5.48	Keiki	2.48	0.399678	3.94	F3	2008-09-29 02:49:24	NO	2005-02-23
Partulina	proxima	NONE	2005	2005-02-23	2004-11-12 01:24:42	2004	4.75	Keiki	1.75	0.282031	3.4	F3	2008-11-11 01:24:42	NO	2005-02-23
Partulina	proxima	NONE	2005	2005-03-09	2004-12-07 19:45:52	2004	4.55	Keiki	1.55	0.249799	3.15	F3	2008-12-06 19:45:52	NO	2005-03-09
Partulina	proxima	NONE	2011	2011-01-05	2004-12-16 19:12:00	2004	19.41	NonKeiki	3.41	6.05534	11.2	F3	2008-12-15 19:12:00	YES	2011-01-05
Partulina	proxima	NONE	2006	2006-11-17	2004-12-29 12:00:00	2004	12.15	NonKeiki	2.15	1.88356	5.85	F3	2008-12-28 12:00:00	NO	2006-11-17
Partulina	proxima	NONE	2009	2009-02-26	2005-02-11 14:24:00	2005	16.07	NonKeiki	0.07	4.04219	9.97	F3	2009-02-10 14:24:00	YES	2009-02-26
Partulina	proxima	NONE	2005	2005-03-24	2005-02-19 01:24:42	2005	3.56	Keiki	0.56	0.0902498	2.82	F3	2009-02-18 01:24:42	NO	2005-03-24
Partulina	proxima	NONE	2005	2005-04-21	2005-03-22 14:07:03	2005	3.5	Keiki	0.5	0.0805802	2.25	F3	2009-03-21 14:07:03	NO	2005-04-21
Partulina	proxima	NONE	2005	2005-04-21	2005-03-28 11:17:38	2005	3.4	Keiki	0.4	0.0644641	2.1	F3	2009-03-27 11:17:38	NO	2005-04-21
Partulina	proxima	NONE	2005	2005-05-24	2005-04-21 01:24:42	2005	3.56	Keiki	0.56	0.0902498	2.82	F3	2009-04-20 01:24:42	NO	2005-05-24
Partulina	proxima	NONE	2005	2005-07-12	2005-04-26 12:42:21	2005	4.3	Keiki	1.3	0.209508	2.95	F3	2009-04-25 12:42:21	NO	2005-07-12
Partulina	proxima	NONE	2005	2005-07-27	2005-06-15 05:38:49	2005	3.71	Keiki	0.71	0.114424	2.72	F3	2009-06-14 05:38:49	NO	2005-07-27
Partulina	proxima	NONE	2007	2007-09-08	2005-08-06 12:00:00	2005	12.65	NonKeiki	2.65	2.08904	13.83	F3	2009-08-05 12:00:00	NO	2007-09-08
Partulina	proxima	NONE	2005	2005-10-07	2005-08-15 01:24:42	2005	3.9	Keiki	0.9	0.145044	2.75	F3	2009-08-14 01:24:42	NO	2005-10-07
Partulina	proxima	NONE	2005	2005-10-07	2005-08-15 01:24:42	2005	3.9	Keiki	0.9	0.145044	2.52	F3	2009-08-14 01:24:42	NO	2005-10-07
Partulina	proxima	NONE	2005	2005-11-18	2005-08-25 21:10:35	2005	4.43	Keiki	1.43	0.230459	2.59	F3	2009-08-24 21:10:35	NO	2005-11-18
Partulina	proxima	NONE	2005	2005-11-18	2005-08-28 19:45:52	2005	4.38	Keiki	1.38	0.222401	2.75	F3	2009-08-27 19:45:52	NO	2005-11-18
Partulina	proxima	NONE	2005	2005-12-30	2005-10-14 12:42:21	2005	4.3	Keiki	1.3	0.209508	2.95	F3	2009-10-13 12:42:21	NO	2005-12-30
Partulina	proxima	NONE	2010	2010-06-03	2005-11-02 14:24:00	2005	16.97	NonKeiki	0.97	4.58466	9.99	F3	2009-11-01 14:24:00	YES	2010-06-03
Partulina	proxima	NONE	2006	2006-02-09	2005-11-07 11:17:38	2005	4.59	Keiki	1.59	0.256245	2.3	F3	2009-11-06 11:17:38	NO	2006-02-09
Partulina	proxima	NONE	2005	2005-12-30	2005-11-09 09:52:56	2005	3.86	Keiki	0.86	0.138598	2.89	F3	2009-11-08 09:52:56	NO	2005-12-30
Partulina	proxima	NONE	2006	2006-02-09	2005-11-09 19:45:52	2005	4.55	Keiki	1.55	0.249799	2.56	F3	2009-11-08 19:45:52	NO	2006-02-09
Partulina	proxima	NONE	2006	2006-02-09	2005-11-22 18:21:10	2005	4.33	Keiki	1.33	0.214343	2.26	F3	2009-11-21 18:21:10	NO	2006-02-09
Partulina	proxima	NONE	2010	2010-10-19	2006-01-24 14:24:00	2006	17.22	NonKeiki	1.22	4.73534	10.15	F3	2010-01-23 14:24:00	YES	2010-10-19
Partulina	proxima	NONE	2008	2008-01-02	2006-02-12	2006	12.16	NonKeiki	2.16	1.88767	10.25	F3	2010-02-11	NO	2008-01-02
Partulina	proxima	NONE	2006	2006-03-10	2006-03-10	2006	3	Keiki	0	0	2.4	F3	2010-03-09	NO	2006-03-10
Partulina	proxima	NONE	2009	2009-08-11	2006-03-10	2006	15.9	NonKeiki	5.9	3.42466	6.98	F3	2010-03-09	NO	2009-08-11
Partulina	proxima	NONE	2007	2007-05-04	2006-04-25 11:17:38	2006	9.35	Keiki	6.35	1.02337	6.23	F3	2010-04-24 11:17:38	NO	2007-05-04
Partulina	proxima	NONE	2007	2007-06-13	2006-06-05 01:24:42	2006	9.34	Keiki	6.34	1.02176	6.99	F3	2010-06-04 01:24:42	NO	2007-06-13
Partulina	proxima	NONE	2006	2006-10-06	2006-06-19 04:14:07	2006	4.85	Keiki	1.85	0.298147	2.91	F3	2010-06-18 04:14:07	NO	2006-10-06
Partulina	proxima	NONE	2006	2006-07-13	2006-06-25 08:28:14	2006	3.3	Keiki	0.3	0.0483481	2.7	F3	2010-06-24 08:28:14	NO	2006-07-13
Partulina	proxima	NONE	2006	2006-07-13	2006-07-13	2006	3	Keiki	0	0		F3	2010-07-12	NO	2006-07-13
Partulina	proxima	NONE	2006	2006-12-29	2006-07-17 21:10:35	2006	5.79	Keiki	2.79	0.449637	4.51	F3	2010-07-16 21:10:35	NO	2006-12-29
Partulina	proxima	NONE	2009	2009-08-11	2006-09-12	2006	14.66	NonKeiki	4.66	2.91507	7.01	F3	2010-09-11	NO	2009-08-11
Partulina	proxima	NONE	2007	2007-11-16	2006-10-18 12:00:00	2006	10.19	NonKeiki	0.19	1.07808	9.36	F3	2010-10-17 12:00:00	NO	2007-11-16
Partulina	proxima	NONE	2012	2012-01-13	2006-10-31	2006	18	NonKeiki	2	5.20548	12.24	F3	2010-10-30	YES	2012-01-13
Partulina	proxima	NONE	2006	2006-12-29	2006-12-01 22:35:17	2006	3.46	Keiki	0.46	0.0741338	3.25	F3	2010-11-30 22:35:17	NO	2006-12-29
Partulina	proxima	NONE	2008	2008-12-30	2007-01-11	2007	12.36	NonKeiki	2.36	1.96986	5.38	F4	2011-01-10	NO	2008-12-30
Partulina	proxima	NONE	2010	2010-06-18	2007-10-31 12:00:00	2007	13.97	NonKeiki	3.97	2.63151	8.99	F4	2011-10-30 12:00:00	NO	2010-06-18
Partulina	proxima	NONE	2009	2009-04-03	2007-12-15 12:00:00	2007	10.73	NonKeiki	0.73	1.3	7.35	F4	2011-12-14 12:00:00	NO	2009-04-03
Partulina	proxima	NONE	2012	2012-01-20	2007-12-25 14:24:00	2007	16.12	NonKeiki	0.12	4.07233	10.52	F4	2011-12-24 14:24:00	YES	2012-01-20
Partulina	proxima	NONE	2010	2010-10-19	2008-04-19 12:00:00	2008	13.65	NonKeiki	3.65	2.5	9.06	F4	2012-04-18 12:00:00	NO	2010-10-19
Partulina	proxima	NONE	2010	2010-10-19	2008-06-14	2008	13.28	NonKeiki	3.28	2.34795	8.94	F4	2012-06-13	NO	2010-10-19
Partulina	proxima	NONE	2012	2012-09-07	2008-06-29 14:24:00	2008	16.32	NonKeiki	0.32	4.19288	9.69	F4	2012-06-28 14:24:00	YES	2012-09-07
Partulina	proxima	NONE	2012	2012-09-11	2009-10-04	2009	14.72	NonKeiki	4.72	2.93973	8.76	F4	2013-10-03	NO	2012-09-11
Partulina	proxima	NONE	2010	2010-06-18	2010-03-22 08:28:14	2010	4.49	Keiki	1.49	0.240129	3.24	F4	2014-03-21 08:28:14	NO	2010-06-18
Partulina	proxima	NONE	2010	2010-11-02	2010-04-04 19:45:52	2010	6.59	Keiki	3.59	0.578566	4.3	F4	2014-04-03 19:45:52	NO	2010-11-02
Partulina	proxima	NONE	2010	2010-10-19	2010-07-03 22:35:17	2010	4.82	Keiki	1.82	0.293312	3.35	F4	2014-07-02 22:35:17	NO	2010-10-19
Partulina	proxima	NONE	2012	2012-01-13	2011-08-17 04:14:07	2011	5.53	Keiki	2.53	0.407736	3.95	F5	2015-08-16 04:14:07	NO	2012-01-13
Partulina	proxima	NONE	2012	2012-03-16	2012-02-17 08:28:14	2012	3.47	Keiki	0.47	0.0757454	4.52	F5	2016-02-16 08:28:14	NO	2012-03-16
Partulina	proxima	NONE	2012	2012-08-14	2012-05-20 02:49:24	2012	4.46	Keiki	1.46	0.235294	3.62	F5	2016-05-19 02:49:24	NO	2012-08-14
