# Supplementary material for: Demographic and genetic factors in the recovery or demise of ex situ populations following a severe bottleneck in fifteen species of Hawaiian tree snails
Source: PeerJ. 2015 Nov 12;3:e1406. doi: 10.7717/peerj.1406 (PMC4647602; doi:10.7717/peerj.1406)
Supplement: Supplemental Information 15 [file peerj-03-1406-s019.xls]

## Sheet: Sheet1
GENUS	SPECIES	ID	YEAR COLLECTED	DATE COLLECTED	BIRTHDATE	BIRTHYEAR	LENGTH	Age Class	Calc1	Age_Calc	WIDTH	Generation	CAGE	Maturity	AliveAtMaturity?
Partulina	mighelsiana	NONE	2001	2001-09-03	2001-09-03	2001	1.05	Keiki	0	0		F3		2004-09-02	No
Partulina	mighelsiana	NONE	1992	1992-06-12	1992-06-12	1992	2	Keiki	0	0		F1		1995-06-12	No
Partulina	mighelsiana	NONE	1994	1994-07-19	1994-07-19	1994	2	Keiki	0	0		F1		1997-07-18	No
Partulina	mighelsiana	NONE	1992	1992-12-20	1992-12-20	1992	2.5	Keiki	0	0		F1		1995-12-20	No
Partulina	mighelsiana	NONE	1995	1995-11-22	1995-11-22	1995	2.5	Keiki	0	0		F2		1998-11-21	No
Partulina	mighelsiana	NONE	1997	1997-03-31	1997-03-31	1997	2.5	Keiki	0	0		F2		2000-03-30	No
Partulina	mighelsiana	NONE	2004	2004-06-22	2004-06-22	2004	2.8	Keiki	0	0	2.22	F4		2007-06-22	No
Partulina	mighelsiana	NONE	2004	2004-09-03	2004-09-03	2004	2.8	Keiki	0	0	2.28	F4		2007-09-03	No
Partulina	mighelsiana	NONE	2004	2004-07-07	2004-06-25 16:00:00	2004	2.97	Keiki	0.17	0.0310502	2.31	F4		2007-06-25 16:00:00	No
Partulina	mighelsiana	NONE	1992	1992-12-07	1992-11-23 16:00:00	1992	3	Keiki	0.2	0.0365297		F1		1995-11-23 16:00:00	No
Partulina	mighelsiana	NONE	1993	1993-07-07	1993-06-23 16:00:00	1993	3	Keiki	0.2	0.0365297		F1		1996-06-22 16:00:00	No
Partulina	mighelsiana	NONE	1993	1993-09-09	1993-08-26 16:00:00	1993	3	Keiki	0.2	0.0365297		F1		1996-08-25 16:00:00	No
Partulina	mighelsiana	NONE	1996	1996-01-16	1996-01-02 16:00:00	1996	3	Keiki	0.2	0.0365297		F2		1999-01-01 16:00:00	No
Partulina	mighelsiana	NONE	1996	1996-01-16	1996-01-02 16:00:00	1996	3	Keiki	0.2	0.0365297		F2		1999-01-01 16:00:00	No
Partulina	mighelsiana	NONE	1996	1996-10-27	1996-10-13 16:00:00	1996	3	Keiki	0.2	0.0365297		F2		1999-10-13 16:00:00	No
Partulina	mighelsiana	NONE	1997	1997-03-31	1997-03-17 16:00:00	1997	3	Keiki	0.2	0.0365297		F2		2000-03-16 16:00:00	No
Partulina	mighelsiana	NONE	2008	2008-06-20	2008-06-06 16:00:00	2008	3	Keiki	0.2	0.0365297		F5		2011-06-06 16:00:00	No
Partulina	mighelsiana	NONE	1996	1996-04-02	1996-03-16 08:00:00	1996	3.05	Keiki	0.25	0.0456621		F2		1999-03-16 08:00:00	No
Partulina	mighelsiana	NONE	2004	2004-01-20	2003-12-28 08:00:00	2003	3.14	Keiki	0.34	0.0621005	2.56	F4		2006-12-27 08:00:00	No
Partulina	mighelsiana	NONE	2004	2004-01-20	2003-12-11	2003	3.4	Keiki	0.6	0.109589	2.52	F4		2006-12-10	No
Partulina	mighelsiana	NONE	1996	1996-04-02	1996-02-20 16:00:00	1996	3.42	Keiki	0.62	0.113242		F2		1999-02-19 16:00:00	No
Partulina	mighelsiana	NONE	1995	1995-10-19	1995-09-03	1995	3.49	Keiki	0.69	0.126027	2.97	F2		1998-09-02	No
Partulina	mighelsiana	NONE	1993	1993-03-25	1993-02-06 08:00:00	1993	3.5	Keiki	0.7	0.127854		F1		1996-02-06 08:00:00	No
Partulina	mighelsiana	NONE	1997	1997-09-17	1997-08-01 08:00:00	1997	3.5	Keiki	0.7	0.127854		F2		2000-07-31 08:00:00	No
Partulina	mighelsiana	NONE	1991	1991-08-24	1991-06-05	1991	4	Keiki	1.2	0.219178		F1		1994-06-04	No
Partulina	mighelsiana	NONE	1992	1992-07-20	1992-05-01	1992	4	Keiki	1.2	0.219178		F1		1995-05-01	No
Partulina	mighelsiana	NONE	1992	1992-08-14	1992-05-26	1992	4	Keiki	1.2	0.219178		F1		1995-05-26	No
Partulina	mighelsiana	NONE	1992	1992-09-01	1992-06-13	1992	4	Keiki	1.2	0.219178		F1		1995-06-13	No
Partulina	mighelsiana	NONE	1992	1992-09-01	1992-06-13	1992	4	Keiki	1.2	0.219178		F1		1995-06-13	No
Partulina	mighelsiana	NONE	1995	1995-11-22	1995-09-03	1995	4	Keiki	1.2	0.219178		F2		1998-09-02	No
Partulina	mighelsiana	NONE	1996	1996-04-02	1995-12-18 16:00:00	1995	4.38	Keiki	1.58	0.288584		F2		1998-12-17 16:00:00	No
Partulina	mighelsiana	NONE	1992	1992-06-26	1992-01-31 08:00:00	1992	5	Keiki	2.2	0.401826		F1		1995-01-30 08:00:00	No
Partulina	mighelsiana	NONE	1992	1992-06-26	1992-01-31 08:00:00	1992	5	Keiki	2.2	0.401826		F1		1995-01-30 08:00:00	No
Partulina	mighelsiana	NONE	1996	1996-10-27	1996-06-02 08:00:00	1996	5	Keiki	2.2	0.401826		F2		1999-06-02 08:00:00	No
Partulina	mighelsiana	NONE	1992	1992-07-20	1992-01-22	1992	5.5	Keiki	2.7	0.493151		F1		1995-01-21	No
Partulina	mighelsiana	NONE	1992	1992-08-14	1992-02-16	1992	5.5	Keiki	2.7	0.493151		F1		1995-02-15	No
Partulina	mighelsiana	NONE	1997	1997-05-01	1996-11-02	1996	5.5	Keiki	2.7	0.493151		F2		1999-11-02	No
Partulina	mighelsiana	NONE	1992	1992-07-20	1991-12-19 16:00:00	1991	6	Keiki	3.2	0.584475		F1		1994-12-18 16:00:00	No
Partulina	mighelsiana	NONE	2005	2005-09-29	2004-05-26	2004	10.2	NonKeiki	0.7	1.34521	5.68	F4		2007-05-26	No
Partulina	mighelsiana	NONE	2007	2007-08-03	2005-07-03	2005	11.7	NonKeiki	2.2	2.08493	7.72	F4		2008-07-02	No
Partulina	mighelsiana	NONE	2001	2001-09-27	1998-04-09	1998	13.6	NonKeiki	4.1	3.47123	9.35	F2		2001-04-08	Yes
Partulina	mighelsiana	NONE	1997	1997-02-28	1992-12-20	1992	14.8	NonKeiki	5.3	4.19452		F1		1995-12-20	Yes
Partulina	mighelsiana	NONE	2008	2008-08-28	2004-06-03 14:24:00	2004	14.87	NonKeiki	5.37	4.23671	8.05	F4		2007-06-03 14:24:00	Yes
Partulina	mighelsiana	NONE	2004	2004-10-29	2000-05-13	2000	15.25	NonKeiki	5.75	4.46575	7.92	F3		2003-05-13	Yes
Partulina	mighelsiana	NONE	1997	1997-09-17	1993-02-05	1993	15.5	NonKeiki	6	4.61644		F1		1996-02-05	Yes
Partulina	mighelsiana	NONE	1994	1994-07-19	1989-08-19	1989	16	NonKeiki	6.5	4.91781		FOUNDER		1992-08-18	Yes
Partulina	mighelsiana	NONE	1997	1997-07-21	1992-08-21	1992	16	NonKeiki	6.5	4.91781		F1		1995-08-21	Yes
Partulina	mighelsiana	NONE	1997	1997-09-17	1992-06-30	1992	16.5	NonKeiki	7	5.21918		F1		1995-06-30	Yes
Partulina	mighelsiana	NONE	1996	1996-10-27	1991-06-13 19:12:00	1991	16.76	NonKeiki	7.26	5.37589	9.79	F1		1994-06-12 19:12:00	Yes
Partulina	mighelsiana	NONE	1992	1992-11-05	1987-05-01	1987	17	NonKeiki	7.5	5.52055		FOUNDER		1990-04-30	Yes
